# Supplementary material for: Quantitative metaproteomics reveals composition and metabolism characteristics of microbial communities in Chinese liquor fermentation starters
Source: Front Microbiol. 2023 Jan 9;13:1098268. doi: 10.3389/fmicb.2022.1098268 (PMC9868298; doi:10.3389/fmicb.2022.1098268)
Supplement: Supplementary file 5 [file Data_Sheet_5.XLSX]

## Sheet: differential_protein_annotation
Supplementary Data 5: The 857 differential proteins in black Daqu microbiota across seasons with annotated taxonomy information.
protein	mean.Sp	mean.Su	mean.Au	FC.Su_Sp	FC.Au_Sp	FC.Au_Su	pvalue_Su.Sp	pvalue.Au_Sp	pvalue.Au_Su	adjusted_pvalue.Su_Sp	adjusted_pvalue.Au_Sp	adjusted_pvalue.Au_Su	pvalue.KW	adjusted_pvalue.KW	significance	evalue	eggNOG_OGs	max_annot_lvl	COG_category	Description	EC	KEGG_ko
qaub_gene_15065	9357.03	6535.89	13124.6	0.6985	1.40265	2.00809	0.00388621	0.739364	0.00519604	0.114323	0.889301	0.0276405	0.00560988	0.0402866	Au+	1.16e-223	COG1363@1|root,COG1363@2|Bacteria,1TQ86@1239|Firmicutes,4HBDK@91061|Bacilli,23JIP@182709|Oceanobacillus	91061|Bacilli	G	M42 glutamyl aminopeptidase	-	-
qaub_gene_20173	260668	55944.6	173837	0.21462	0.666889	3.1073	0.00150469	0.314999	0.00388621	0.10398	0.599784	0.0222394	0.00236319	0.0261936	Au+	9.15e-285	COG0719@1|root,COG0719@2|Bacteria,1TRT0@1239|Firmicutes,4HB6W@91061|Bacilli,27BJK@186824|Thermoactinomycetaceae	91061|Bacilli	O	Uncharacterized protein family (UPF0051)	-	K07033,K09015
qaub_gene_25636	243352	57791	311022	0.237478	1.27807	5.38185	0.00105003	0.578742	4.33004e-05	0.103939	0.797908	0.00102315	0.000395196	0.0172216	Au+	1.23e-36	2BBDR@1|root,324WV@2|Bacteria,1UAIT@1239|Firmicutes,4IKX9@91061|Bacilli,1ZI6G@1386|Bacillus	91061|Bacilli	-	-	-	-
qaub_gene_30303	152838	70010.9	321099	0.458074	2.10091	4.58641	0.0892096	0.035463	0.000205677	0.396036	0.214861	0.00258863	0.00160053	0.0221777	Au+	1.1e-161	COG0214@1|root,COG0214@2|Bacteria,1TPSZ@1239|Firmicutes,4H9RA@91061|Bacilli,4C4Q5@84406|Virgibacillus	91061|Bacilli	H	Catalyzes the formation of pyridoxal 5'-phosphate from ribose 5-phosphate (RBP), glyceraldehyde 3-phosphate (G3P) and ammonia. The ammonia is provided by the PdxT subunit. Can also use ribulose 5-phosphate and dihydroxyacetone phosphate as substrates, resulting from enzyme-catalyzed isomerization of RBP and G3P, respectively	4.3.3.6	K06215
qaub_gene_76150	202529	97060	298917	0.479241	1.47592	3.07971	0.0432571	0.14314	2.16502e-05	0.279663	0.394322	0.000724144	0.00108121	0.0198991	Au+	0	COG0021@1|root,COG0021@2|Bacteria,1TPIB@1239|Firmicutes,4HADA@91061|Bacilli	91061|Bacilli	G	Catalyzes the transfer of a two-carbon ketol group from a ketose donor to an aldose acceptor, via a covalent intermediate with the cofactor thiamine pyrophosphate	2.2.1.1	K00615
qaub_gene_87609	191209	82545.6	242096	0.431703	1.26613	2.93288	0.00287947	0.247451	0.000487129	0.109855	0.528602	0.00477035	0.00112388	0.0199913	Au+	5.88e-242	COG0151@1|root,COG0151@2|Bacteria,1UHN9@1239|Firmicutes,4HA70@91061|Bacilli,27BDR@186824|Thermoactinomycetaceae	91061|Bacilli	F	Phosphoribosylglycinamide synthetase, C domain	6.3.4.13	K01945
qaub_gene_87612	46891.2	12379.7	37440.4	0.264009	0.798452	3.02434	4.33004e-05	0.190316	0.14314	0.0198234	0.459935	0.378384	0.0030393	0.0294068	Sp+	3.32e-124	COG0299@1|root,COG0299@2|Bacteria,1V3RJ@1239|Firmicutes,4HGY5@91061|Bacilli,27BQW@186824|Thermoactinomycetaceae	91061|Bacilli	F	Formyl transferase	2.1.2.2	K11175
qaub_gene_116296	24744	11984.1	26354.5	0.484322	1.06509	2.19913	0.0288056	0.352681	0.00150469	0.230602	0.637402	0.0106594	0.00641554	0.0437152	Au+	7.11e-194	COG0667@1|root,COG0667@2|Bacteria,2GMT5@201174|Actinobacteria,4DX8D@85010|Pseudonocardiales	201174|Actinobacteria	C	aldo keto reductase	-	-
qaub_gene_116922	92385.5	16499	67770.3	0.178589	0.73356	4.10754	0.000324753	0.578742	0.000205677	0.0792938	0.797908	0.00258863	0.000435914	0.0172216	Au+	2.72e-266	COG2079@1|root,COG2079@2|Bacteria,1TRR8@1239|Firmicutes,4HAUS@91061|Bacilli,26VRI@186822|Paenibacillaceae	91061|Bacilli	S	MmgE/PrpD family	4.2.1.79	K01720
qauw_gene_93753	30056.3	5990.79	11937.3	0.199319	0.397165	1.99261	1.08251e-05	0.0288056	0.190316	0.0113277	0.203276	0.464378	0.000835281	0.0179939	Sp+	2.67e-60	2E85N@1|root,332J6@2|Bacteria,1VFSE@1239|Firmicutes,4HNIY@91061|Bacilli,1ZISW@1386|Bacillus	91061|Bacilli	S	Spore coat associated protein JA (CotJA)	-	K06332
qauw_gene_93754	36960.6	6620.34	16002.4	0.179119	0.43296	2.41717	7.57756e-05	0.0114962	0.481251	0.0292135	0.17917	0.779731	0.00140678	0.0214234	Sp+	1.62e-61	2E34J@1|root,32Y4N@2|Bacteria,1VESM@1239|Firmicutes,4HKID@91061|Bacilli,1ZI8X@1386|Bacillus	91061|Bacilli	S	CotJB protein	-	K06333
qauw_gene_108870	172036	40891.2	123755	0.237689	0.719354	3.02645	0.00388621	0.578742	0.00519604	0.114323	0.797908	0.0276405	0.00524583	0.0389713	Au+	1.72e-43	COG2002@1|root,COG2002@2|Bacteria,1VA3H@1239|Firmicutes,4HKCH@91061|Bacilli,3IY77@400634|Lysinibacillus	91061|Bacilli	K	Transition state regulator Abh	-	K06284
qauw_gene_150903	90474.7	12168.5	66720.6	0.134496	0.73745	5.48306	0.0089307	0.393048	0.00105003	0.140682	0.669242	0.00838767	0.00393921	0.0334488	Au+	9.15e-284	COG1960@1|root,COG1960@2|Bacteria,1TP57@1239|Firmicutes,4HAKV@91061|Bacilli,27BD9@186824|Thermoactinomycetaceae	91061|Bacilli	I	Acyl-CoA dehydrogenase, C-terminal domain	1.3.8.1,1.3.8.7	K00248,K00249
qauw_gene_158447	35620.5	5881.34	20598.5	0.165111	0.578276	3.50234	4.33004e-05	0.0089307	0.481251	0.0198234	0.177283	0.779731	0.00102814	0.0193855	Sp+	3.23e-274	COG1388@1|root,COG3858@1|root,COG1388@2|Bacteria,COG3858@2|Bacteria,1TQK2@1239|Firmicutes,4HBJC@91061|Bacilli,1ZBQC@1386|Bacillus	91061|Bacilli	M	Glycoside Hydrolase Family	-	K06306
qauw_gene_260985	796882	279995	1.99726e+06	0.351364	2.50635	7.13321	0.00684146	0.105122	0.00287947	0.131532	0.338025	0.0177096	0.00282378	0.0282571	Au+	2.02e-270	COG0045@1|root,COG0045@2|Bacteria,1TQG4@1239|Firmicutes,4HA3W@91061|Bacilli,1ZB9P@1386|Bacillus	91061|Bacilli	C	Succinyl-CoA synthetase functions in the citric acid cycle (TCA), coupling the hydrolysis of succinyl-CoA to the synthesis of either ATP or GTP and thus represents the only step of substrate-level phosphorylation in the TCA. The beta subunit provides nucleotide specificity of the enzyme and binds the substrate succinate, while the binding sites for coenzyme A and phosphate are found in the alpha …	6.2.1.5	K01903
qauy_gene_6532	30048.1	6248.77	75835.7	0.207959	2.52381	12.1361	0.0185434	0.14314	0.00287947	0.188391	0.394322	0.0177096	0.00489275	0.0375282	Au+	1.04e-72	28IM7@1|root,2QQY3@2759|Eukaryota,38EBQ@33154|Opisthokonta,3NVS8@4751|Fungi,3QKHJ@4890|Ascomycota,20BZV@147545|Eurotiomycetes,3S3S4@5042|Eurotiales	4751|Fungi	S	oxidative stress	-	-
qauy_gene_13552	10525.1	5660.8	37535.9	0.537837	3.56631	6.63083	0.853428	0.0114962	0.000725281	0.959386	0.17917	0.00633972	0.00431158	0.0348206	Au+	9.33e-17	COG0491@1|root,KOG0813@2759|Eukaryota,38RE4@33154|Opisthokonta,3NW99@4751|Fungi,3QKWF@4890|Ascomycota,20D9X@147545|Eurotiomycetes,3B2CE@33183|Onygenales,3FNC2@34383|Onygenales incertae sedis	4751|Fungi	S	Hydroxyacylglutathione hydrolase	3.1.2.6	K01069
qauy_gene_14806	21021.2	9362.72	69477.2	0.445395	3.30511	7.42062	0.528849	0.0146896	0.000725281	0.821246	0.182685	0.00633972	0.00387869	0.0333467	Au+	8.26e-36	COG0045@1|root,KOG1254@2759|Eukaryota,38CW6@33154|Opisthokonta,3BBF9@33208|Metazoa,3CYPS@33213|Bilateria,48ACP@7711|Chordata,4950Z@7742|Vertebrata,3J9C5@40674|Mammalia,35JKW@314146|Euarchontoglires,4MEST@9443|Primates,35W4E@314294|Cercopithecoidea	33208|Metazoa	C	ATP-citrate synthase is the primary enzyme responsible for the synthesis of cytosolic acetyl-CoA in many tissues	2.3.3.8	K01648
qauy_gene_21588	94472.2	37566.3	169455	0.397644	1.7937	4.51082	0.00684146	0.00684146	2.16502e-05	0.131532	0.177283	0.000724144	0.000111163	0.0172216	Au+	2.91e-21	COG0096@1|root,KOG1754@2759|Eukaryota,3A1RU@33154|Opisthokonta,3P2XK@4751|Fungi,3QTZW@4890|Ascomycota,201QT@147541|Dothideomycetes,4KF9X@92860|Pleosporales	4751|Fungi	J	Belongs to the universal ribosomal protein uS8 family	-	K02957
qauy_gene_24955	474919	205470	1.04978e+06	0.432641	2.21044	5.10917	0.795936	0.0232306	0.000324753	0.941727	0.192276	0.00350857	0.00493715	0.0377501	Au+	3.25e-23	COG0234@1|root,KOG1641@2759|Eukaryota,3A5MZ@33154|Opisthokonta,3P5D4@4751|Fungi,3QW4M@4890|Ascomycota,20HRZ@147545|Eurotiomycetes,3S98Q@5042|Eurotiales	4751|Fungi	O	Belongs to the GroES chaperonin family	-	K04078
qauy_gene_30115	185948	98458.9	302058	0.529496	1.62442	3.06786	0.0630128	0.0432571	0.000324753	0.339389	0.228284	0.00350857	0.00178837	0.0232678	Au+	7.21e-35	COG0081@1|root,KOG1570@2759|Eukaryota,38FV6@33154|Opisthokonta,3NUHC@4751|Fungi,3QJR2@4890|Ascomycota,20AXD@147545|Eurotiomycetes,3S7G7@5042|Eurotiales	4751|Fungi	J	Belongs to the universal ribosomal protein uL1 family	-	K02865
qauy_gene_32644	52864.3	8787.1	142261	0.16622	2.69106	16.1898	0.481251	0.0232306	0.00105003	0.791994	0.192276	0.00838767	0.005581	0.0402767	Au+	8e-77	COG0182@1|root,KOG1468@2759|Eukaryota,38EG5@33154|Opisthokonta,3NVZ3@4751|Fungi,3QKIW@4890|Ascomycota,20B4V@147545|Eurotiomycetes,3S3M3@5042|Eurotiales	4751|Fungi	E	Catalyzes the interconversion of methylthioribose-1- phosphate (MTR-1-P) into methylthioribulose-1-phosphate (MTRu-1- P)	5.3.1.23	K08963
qauy_gene_43331	12789.5	7213.47	43737	0.564016	3.41977	6.06324	0.739364	0.0114962	0.00287947	0.920279	0.17917	0.0177096	0.00707656	0.0463233	Au+	8.25e-52	COG5064@1|root,KOG0166@2759|Eukaryota,38CKN@33154|Opisthokonta,3NU5E@4751|Fungi,3QM4Y@4890|Ascomycota,20DH0@147545|Eurotiomycetes,3B1R2@33183|Onygenales	4751|Fungi	U	Belongs to the importin alpha family	-	-
qauy_gene_55212	33312.7	12042.4	61633.4	0.361497	1.85015	5.11802	0.035463	0.217563	0.000324753	0.255676	0.494768	0.00350857	0.00295805	0.0290842	Au+	8.06e-18	KOG1782@1|root,KOG1782@2759|Eukaryota,3A20V@33154|Opisthokonta,3Q3BW@4751|Fungi,3RKDD@4890|Ascomycota,20GV7@147545|Eurotiomycetes,3S87Z@5042|Eurotiales	4751|Fungi	A	Small nuclear ribonucleoprotein (LSM1)	-	K12620
qauy_gene_56046	10124.1	5773.77	18152.8	0.570299	1.79303	3.14401	0.00105003	0.795936	0.00519604	0.103939	0.911971	0.0276405	0.00305108	0.0294068	Au+	3e-54	COG0776@1|root,COG0776@2|Bacteria,1V9XQ@1239|Firmicutes,4HKF2@91061|Bacilli,1ZH48@1386|Bacillus	91061|Bacilli	L	Histone-like DNA-binding protein which is capable of wrapping DNA to stabilize it, and thus to prevent its denaturation under extreme environmental conditions	-	K03530
qauy_gene_59884	98455.7	41593.4	253010	0.422458	2.56978	6.08293	0.435872	0.00684146	7.57756e-05	0.762178	0.177283	0.00140166	0.00102814	0.0193855	Au+	9.61e-55	COG0526@1|root,KOG0190@2759|Eukaryota,38GTB@33154|Opisthokonta,3NZ2W@4751|Fungi,3QJD6@4890|Ascomycota,20B16@147545|Eurotiomycetes,3S4KB@5042|Eurotiales	4751|Fungi	O	Protein disulfide isomerase	5.3.4.1	K09580
qauy_gene_63857	32531.6	12085.5	78712	0.371501	2.41955	6.51291	0.075256	0.0185434	1.08251e-05	0.366523	0.186069	0.000574593	0.000410794	0.0172216	Au+	3.17e-25	COG0760@1|root,KOG3258@2759|Eukaryota,3A3IH@33154|Opisthokonta,3P4B1@4751|Fungi,3QW25@4890|Ascomycota,20HBR@147545|Eurotiomycetes,3S90W@5042|Eurotiales	4751|Fungi	O	Peptidyl-prolyl cis-trans isomerase	5.2.1.8	K09579
qauy_gene_86425	51943.2	34071.5	124328	0.655937	2.39353	3.64902	0.795936	0.0146896	0.000205677	0.941727	0.182685	0.00258863	0.00279479	0.0280436	Au+	1.44e-53	COG2236@1|root,2RBZX@2759|Eukaryota,39J0H@33154|Opisthokonta,3Q3DB@4751|Fungi,3RKER@4890|Ascomycota,20AMF@147545|Eurotiomycetes,3AZSZ@33183|Onygenales,3FUF8@34384|Arthrodermataceae	4751|Fungi	D	Xanthine phosphoribosyltransferase	-	K07101
qauy_gene_89838	52372.2	37728.7	111212	0.720395	2.1235	2.94768	0.247451	0.00519604	0.00150469	0.622878	0.177283	0.0106594	0.00245964	0.0266128	Au+	1.77e-52	COG1890@1|root,KOG1628@2759|Eukaryota,38EQE@33154|Opisthokonta,3NVFE@4751|Fungi,3QMBR@4890|Ascomycota,20ANE@147545|Eurotiomycetes,3S2RR@5042|Eurotiales	4751|Fungi	J	Belongs to the eukaryotic ribosomal protein eS1 family	-	K02984
qauy_gene_99031	375852	201047	692823	0.53491	1.84334	3.44607	0.279861	0.075256	0.000129901	0.655994	0.283857	0.00195787	0.00364575	0.0322136	Au+	9.9e-24	COG1390@1|root,KOG1664@2759|Eukaryota,38FW0@33154|Opisthokonta,3NXSD@4751|Fungi,3QPPF@4890|Ascomycota,20FYW@147545|Eurotiomycetes,3S3BB@5042|Eurotiales	4751|Fungi	C	ATP synthase subunit E	-	K02150
qauy_gene_107452	73214.4	34748.3	148392	0.47461	2.02681	4.27048	0.0524259	0.0089307	1.08251e-05	0.309444	0.177283	0.000574593	0.000243596	0.0172216	Au+	4.53e-41	COG5580@1|root,KOG2936@2759|Eukaryota,39P2Y@33154|Opisthokonta,3NVRU@4751|Fungi,3QJUU@4890|Ascomycota,20CM0@147545|Eurotiomycetes,3S3GI@5042|Eurotiales	4751|Fungi	O	Aha1 domain family	-	-
qspb_gene_542	66532	20503.2	151870	0.30817	2.28266	7.40713	0.123005	0.0524259	0.000205677	0.458299	0.245851	0.00258863	0.00229113	0.025899	Au+	9.46e-86	KOG0094@1|root,KOG0094@2759|Eukaryota,38CQH@33154|Opisthokonta,3NYN5@4751|Fungi,3QKTI@4890|Ascomycota,20BF1@147545|Eurotiomycetes,3S5TV@5042|Eurotiales	4751|Fungi	U	RAS small monomeric GTPase Rab6	-	K07893
qspb_gene_5610	13594.5	15571.2	5786.37	1.14541	0.425641	0.371606	0.630529	0.000324753	7.57756e-05	0.869797	0.177283	0.00140166	0.000301393	0.0172216	Su+	5.71e-65	COG5184@1|root,COG5492@1|root,COG5184@2|Bacteria,COG5492@2|Bacteria,1TRUK@1239|Firmicutes,4HGAC@91061|Bacilli	91061|Bacilli	N	Phage major tail protein phi13	-	-
qspb_gene_19076	52824.3	20227.3	103084	0.382917	1.95144	5.09625	0.00519604	0.105122	7.57756e-05	0.121601	0.338025	0.00140166	0.000479589	0.0172216	Au+	4.16e-132	COG0154@1|root,KOG1212@2759|Eukaryota,38CWX@33154|Opisthokonta,3NTYP@4751|Fungi,3QPRQ@4890|Ascomycota,20DV9@147545|Eurotiomycetes,3S4ZT@5042|Eurotiales	4751|Fungi	IJT	Acetamidase	3.5.1.4	K01426
qspb_gene_46261	202998	140544	369010	0.692343	1.8178	2.62558	0.123005	0.0232306	0.000324753	0.458299	0.192276	0.00350857	0.00181627	0.0233817	Au+	4.46e-44	COG0098@1|root,KOG0877@2759|Eukaryota,38F84@33154|Opisthokonta,3NWFC@4751|Fungi,3QK9X@4890|Ascomycota,20DXR@147545|Eurotiomycetes,3S3EI@5042|Eurotiales	4751|Fungi	J	Belongs to the universal ribosomal protein uS5 family	-	K02981
qspb_gene_51807	25966	14074.5	128528	0.542035	4.94983	9.13194	0.795936	0.00105003	0.000205677	0.941727	0.177283	0.00258863	0.000743701	0.0178661	Au+	1.34e-83	COG5190@1|root,KOG2832@2759|Eukaryota,38DKE@33154|Opisthokonta,3NW4Q@4751|Fungi,3QM7F@4890|Ascomycota,20EQW@147545|Eurotiomycetes,3S5KF@5042|Eurotiales	4751|Fungi	U	Mitochondrial translocase complex component (Tim50)	-	K17496
qspb_gene_70182	74552.7	28677.4	110740	0.38466	1.4854	3.86159	0.00388621	0.0892096	1.08251e-05	0.114323	0.310875	0.000574593	0.000214384	0.0172216	Au+	3.81e-15	COG0308@1|root,KOG1046@2759|Eukaryota,37KDN@33090|Viridiplantae,3GF9G@35493|Streptophyta,4JD8X@91835|fabids	35493|Streptophyta	EO	aminopeptidase	-	K08776
qspb_gene_83737	329243	134990	486636	0.41	1.47805	3.60499	0.0114962	0.14314	0.000205677	0.154231	0.394322	0.00258863	0.00115923	0.0201695	Au+	1.31e-235	COG0508@1|root,COG0508@2|Bacteria,1TP3C@1239|Firmicutes,4HBVM@91061|Bacilli,1ZBCB@1386|Bacillus	91061|Bacilli	C	The 2-oxoglutarate dehydrogenase complex catalyzes the overall conversion of 2-oxoglutarate to succinyl-CoA and CO(2)	2.3.1.61	K00658
qspb_gene_86664	237735	128435	461589	0.540246	1.94161	3.59394	0.0892096	0.0630128	0.00208924	0.396036	0.262853	0.0138998	0.00594526	0.0418338	Au+	1.62e-229	COG0039@1|root,COG0039@2|Bacteria,2GJHS@201174|Actinobacteria,4DYMT@85010|Pseudonocardiales	201174|Actinobacteria	C	Catalyzes the reversible oxidation of malate to oxaloacetate	1.1.1.37	K00024
qspb_gene_86777	63535.7	7545.43	15323.1	0.118759	0.241172	2.03077	0.000129901	0.00684146	0.739364	0.0453107	0.177283	0.918095	0.0015161	0.021991	Sp+	0	COG5434@1|root,COG5434@2|Bacteria,1TSDM@1239|Firmicutes,4HF01@91061|Bacilli,1ZB2S@1386|Bacillus	91061|Bacilli	M	Pectate lyase superfamily protein	-	-
qspb_gene_104755	109226	31626.7	344705	0.289554	3.1559	10.8992	0.739364	0.00519604	0.000725281	0.920279	0.177283	0.00633972	0.00255342	0.0269507	Au+	1.65e-94	COG0386@1|root,KOG1651@2759|Eukaryota,3A1XE@33154|Opisthokonta,3P24F@4751|Fungi,3QU3Q@4890|Ascomycota,20B4G@147545|Eurotiomycetes,3S61W@5042|Eurotiales	4751|Fungi	E	Belongs to the glutathione peroxidase family	1.11.1.9	K00432
qspb_gene_126584	70094	6410.42	23518.4	0.0914547	0.335527	3.66878	1.08251e-05	0.0089307	0.578742	0.0113277	0.177283	0.846671	0.000778058	0.0178661	Sp+	3.28e-50	COG5577@1|root,COG5577@2|Bacteria,1V91D@1239|Firmicutes,4HJ0J@91061|Bacilli,1ZGWF@1386|Bacillus	91061|Bacilli	M	Spore coat protein	-	K06329
qspb_gene_162833	288748	123224	531955	0.426751	1.84228	4.31699	0.123005	0.0432571	0.00388621	0.458299	0.228284	0.0222394	0.00793772	0.0495685	Au+	0	COG0308@1|root,COG0308@2|Bacteria,2GJJ4@201174|Actinobacteria,4DZZJ@85010|Pseudonocardiales	201174|Actinobacteria	E	aminopeptidase N	3.4.11.2	K01256,K08776
qspb_gene_170340	12486.2	5882.67	32762.4	0.471133	2.62389	5.56931	0.795936	0.0146896	0.000324753	0.941727	0.182685	0.00350857	0.00328395	0.0305272	Au+	5.21e-59	COG0443@1|root,KOG0101@2759|Eukaryota,38D3W@33154|Opisthokonta,3NUH7@4751|Fungi,3QN82@4890|Ascomycota,20DVE@147545|Eurotiomycetes,3MQJR@451870|Chaetothyriomycetidae	4751|Fungi	O	Belongs to the heat shock protein 70 family	-	K03283
qspw_gene_11294	128913	53504.4	192539	0.415044	1.49356	3.59856	0.0089307	0.075256	4.33004e-05	0.140682	0.283857	0.00102315	0.000431995	0.0172216	Au+	6.36e-228	COG0499@1|root,KOG1370@2759|Eukaryota,38CN8@33154|Opisthokonta,3NU46@4751|Fungi,1GSQA@112252|Fungi incertae sedis	4751|Fungi	H	S-adenosyl-L-homocysteine hydrolase, NAD binding domain	3.3.1.1	K01251
qspw_gene_33347	161343	83779	360353	0.519261	2.23347	4.30124	0.528849	0.0288056	0.000324753	0.821246	0.203276	0.00350857	0.00405264	0.0339652	Au+	5.41e-72	KOG0096@1|root,KOG0096@2759|Eukaryota,38BBN@33154|Opisthokonta,3NW2J@4751|Fungi,3QPIC@4890|Ascomycota,3RS7J@4891|Saccharomycetes,3RYRV@4893|Saccharomycetaceae	4751|Fungi	U	GTP-binding protein involved in nucleocytoplasmic transport. Required for the import of protein into the nucleus and also for RNA export. Involved in chromatin condensation and control of cell cycle	-	K07936
qspw_gene_50536	27313.4	5764.57	14765.3	0.211053	0.540588	2.56138	0.00519604	1	0.000725281	0.121601	1	0.00633972	0.00274121	0.0280047	Au+	2.45e-151	COG0235@1|root,COG0235@2|Bacteria,1TPDV@1239|Firmicutes,4H9W0@91061|Bacilli,1ZDGI@1386|Bacillus	91061|Bacilli	G	COG0235 Ribulose-5-phosphate 4-epimerase and related epimerases and aldolases	5.1.3.4	K03077
qspw_gene_66926	98835.7	37080	201594	0.375168	2.03969	5.43673	0.0146896	0.00519604	1.08251e-05	0.169987	0.177283	0.000574593	0.000109455	0.0172216	Au+	2.57e-141	COG1310@1|root,KOG1555@2759|Eukaryota,38G6Q@33154|Opisthokonta,3NV6C@4751|Fungi,1GSH1@112252|Fungi incertae sedis	4751|Fungi	O	Maintenance of mitochondrial structure and function	-	K03030
qspw_gene_91063	91691.3	22493.3	88398.9	0.245316	0.964092	3.93001	1.08251e-05	1	1.08251e-05	0.0113277	1	0.000574593	6.26831e-05	0.0172216	Au+Sp+	0	COG0443@1|root,COG0443@2|Bacteria,1TP1J@1239|Firmicutes,4HA9S@91061|Bacilli,1ZAZ2@1386|Bacillus	91061|Bacilli	O	Heat shock 70 kDa protein	-	K04043
qspw_gene_161758	107913	54956.4	157776	0.509268	1.46207	2.87092	0.0232306	0.247451	0.000324753	0.208025	0.528602	0.00350857	0.00252394	0.0269502	Au+	5.35e-20	KOG0394@1|root,KOG0394@2759|Eukaryota,38C61@33154|Opisthokonta,3NWMV@4751|Fungi,1GSAB@112252|Fungi incertae sedis	4751|Fungi	U	Rab subfamily of small GTPases	-	K07897
qspw_gene_238990	14630.8	7623.2	30688.3	0.521037	2.09751	4.02564	0.075256	0.0432571	1.08251e-05	0.366523	0.228284	0.000574593	0.000633741	0.0172216	Au+	3.7e-281	COG1048@1|root,KOG0453@2759|Eukaryota,38CNX@33154|Opisthokonta,3NV17@4751|Fungi,1GRZ0@112252|Fungi incertae sedis	4751|Fungi	CE	Aconitase family (aconitate hydratase)	4.2.1.3	K01681
qspw_gene_310316	371117	148187	623282	0.3993	1.67947	4.20604	0.00388621	0.123005	0.000129901	0.114323	0.367761	0.00195787	0.000549882	0.0172216	Au+	2.71e-142	COG5040@1|root,KOG0841@2759|Eukaryota,38CKG@33154|Opisthokonta,3NU75@4751|Fungi,1GV7G@112252|Fungi incertae sedis	4751|Fungi	O	Mortierella verticillata NRRL 6337	-	K06630
qspw_gene_355037	617446	275688	677110	0.446497	1.09663	2.45608	0.00287947	0.795936	0.00208924	0.109855	0.911971	0.0138998	0.00313894	0.0298607	Au+	9.08e-243	COG0513@1|root,KOG0327@2759|Eukaryota,38CTS@33154|Opisthokonta,3NUYA@4751|Fungi,1GS5C@112252|Fungi incertae sedis	4751|Fungi	A	Mortierella verticillata NRRL 6337 ATP-dependent RNA helicase eIF4A	-	K03257
qspw_gene_383752	243193	129874	309048	0.534036	1.27079	2.3796	0.075256	0.217563	0.000725281	0.366523	0.494768	0.00633972	0.00617194	0.0426102	Au+	2.56e-129	COG0097@1|root,KOG3255@2759|Eukaryota,39ZYK@33154|Opisthokonta,3NWQY@4751|Fungi,1GTHB@112252|Fungi incertae sedis	4751|Fungi	J	Ribosomal protein L6	-	K02940
qspw_gene_395663	717193	534023	1.19402e+06	0.744602	1.66485	2.23589	0.217563	0.035463	0.00150469	0.588496	0.214861	0.0106594	0.00575654	0.0408591	Au+	9.4e-76	COG0538@1|root,KOG1526@2759|Eukaryota,38CG3@33154|Opisthokonta,3NVZ4@4751|Fungi,3QKEP@4890|Ascomycota,3RTDH@4891|Saccharomycetes	4751|Fungi	C	Belongs to the isocitrate and isopropylmalate dehydrogenases family	1.1.1.42	K00031
qspw_gene_420558	616469	246979	975782	0.400635	1.58286	3.95087	0.0524259	0.14314	0.000324753	0.309444	0.394322	0.00350857	0.00294662	0.0290842	Au+	8.25e-45	COG5277@1|root,KOG0676@2759|Eukaryota,38C0D@33154|Opisthokonta,3NWC7@4751|Fungi,3QK5Q@4890|Ascomycota,20AFM@147545|Eurotiomycetes,3B25P@33183|Onygenales	4751|Fungi	Z	Belongs to the actin family	-	K05692
qspw_gene_450015	322899	130936	697074	0.405502	2.1588	5.32378	0.0524259	0.0232306	4.33004e-05	0.309444	0.192276	0.00102315	0.000570848	0.0172216	Au+	9.88e-255	COG0045@1|root,KOG1254@2759|Eukaryota,38CW6@33154|Opisthokonta,3NU5J@4751|Fungi,1GS1Z@112252|Fungi incertae sedis	4751|Fungi	C	ATP citrate lyase citrate-binding	2.3.3.8	K01648
qspy_gene_31897	669817	320834	1.18575e+06	0.478987	1.77027	3.69586	0.075256	0.075256	0.000205677	0.366523	0.283857	0.00258863	0.00214798	0.0251342	Au+	3.61e-16	COG0513@1|root,KOG0328@2759|Eukaryota	2759|Eukaryota	JKL	helicase activity	3.6.4.13	K13025
qspy_gene_35291	9710.03	6128.4	43216.7	0.631141	4.45073	7.05188	0.123005	0.00208924	4.33004e-05	0.458299	0.177283	0.00102315	0.000284758	0.0172216	Au+	1.03e-22	COG2723@1|root,COG2723@2|Bacteria,1TP19@1239|Firmicutes,2485V@186801|Clostridia,3WHH2@541000|Ruminococcaceae	186801|Clostridia	G	PFAM glycoside hydrolase family 1	3.2.1.21	K05350
qspy_gene_38487	219263	92104.5	520921	0.420065	2.37578	5.65576	0.217563	0.0089307	1.08251e-05	0.588496	0.177283	0.000574593	0.000483317	0.0172216	Au+	3.91e-102	COG0480@1|root,KOG0469@2759|Eukaryota,38CUM@33154|Opisthokonta,3NW98@4751|Fungi,3QKTN@4890|Ascomycota,20D5X@147545|Eurotiomycetes,3S693@5042|Eurotiales	4751|Fungi	J	Elongation factor	-	K03234
qspy_gene_71704	29412.7	11995	88949.8	0.407818	3.02419	7.41555	0.578742	0.0089307	0.00287947	0.846164	0.177283	0.0177096	0.00582378	0.0411768	Au+	6.45e-11	COG0469@1|root,KOG2323@2759|Eukaryota,38BPM@33154|Opisthokonta,3NUBE@4751|Fungi,3QP88@4890|Ascomycota,2133G@147550|Sordariomycetes,3U5SR@5139|Sordariales,3HF1M@35718|Chaetomiaceae	4751|Fungi	G	Belongs to the pyruvate kinase family	2.7.1.40	K00873
qspy_gene_76719	359654	352799	834268	0.980941	2.31964	2.36471	0.911797	0.0114962	0.00150469	0.975879	0.17917	0.0106594	0.0057417	0.0408591	Au+	2.16e-22	COG0459@1|root,KOG0356@2759|Eukaryota,38BJH@33154|Opisthokonta,3NY3W@4751|Fungi,3QQ98@4890|Ascomycota,20BDT@147545|Eurotiomycetes,3MRRS@451870|Chaetothyriomycetidae	4751|Fungi	O	Belongs to the chaperonin (HSP60) family	-	K04077
qspy_gene_108188	52450	13321.5	88676.6	0.253985	1.69069	6.65664	0.0630128	0.14314	4.33004e-05	0.339389	0.394322	0.00102315	0.00160053	0.0221777	Au+	6.6e-68	COG5023@1|root,KOG1375@2759|Eukaryota,38EHS@33154|Opisthokonta,3NVXK@4751|Fungi,3QM2R@4890|Ascomycota,203SI@147541|Dothideomycetes	4751|Fungi	Z	Tubulin is the major constituent of microtubules. It binds two moles of GTP, one at an exchangeable site on the beta chain and one at a non-exchangeable site on the alpha chain	-	K07375
qspy_gene_136266	93871.5	61685.6	214758	0.657129	2.28779	3.4815	0.393048	0.00150469	7.57756e-05	0.732217	0.177283	0.00140166	0.000483317	0.0172216	Au+	3.57e-98	COG5023@1|root,KOG1376@2759|Eukaryota,39SC7@33154|Opisthokonta,3P005@4751|Fungi,3QNW3@4890|Ascomycota,20B0E@147545|Eurotiomycetes,3B15G@33183|Onygenales,3FV6M@34384|Arthrodermataceae	4751|Fungi	Z	Tubulin is the major constituent of microtubules. It binds two moles of GTP, one at an exchangeable site on the beta chain and one at a non-exchangeable site on the alpha chain	-	K07374
qspy_gene_144249	22892.9	13494.9	54919.9	0.589478	2.39899	4.06968	0.190316	0.0232306	0.00287947	0.555404	0.192276	0.0177096	0.00610068	0.0422777	Au+	2.62e-13	COG0048@1|root,KOG1749@2759|Eukaryota,39ZWD@33154|Opisthokonta,3P20Z@4751|Fungi,3QUH6@4890|Ascomycota,20GSR@147545|Eurotiomycetes,3MSRX@451870|Chaetothyriomycetidae	4751|Fungi	J	Belongs to the universal ribosomal protein uS12 family	-	K02973
qspy_gene_157255	16500.4	7996.95	20818	0.484653	1.26167	2.60324	0.0185434	0.247451	0.000487129	0.188391	0.528602	0.00477035	0.00267483	0.0276348	Au+	7.1e-12	COG0308@1|root,KOG1046@2759|Eukaryota,38CFG@33154|Opisthokonta,3BADC@33208|Metazoa,3CW5S@33213|Bilateria,486H0@7711|Chordata,48VUN@7742|Vertebrata,3JCRF@40674|Mammalia,35ATJ@314146|Euarchontoglires,4MBUI@9443|Primates,4MWHQ@9604|Hominidae	33208|Metazoa	O	Peptidase family M1 domain	-	K08776
qsublack_gene_700	34715.8	11556.9	72720.8	0.332901	2.09475	6.29241	0.217563	0.0892096	0.00105003	0.588496	0.310875	0.00838767	0.00793772	0.0495685	Au+	1.32e-143	KOG0908@1|root,KOG0908@2759|Eukaryota,38B97@33154|Opisthokonta,3NYV7@4751|Fungi,3QJQM@4890|Ascomycota,20ASV@147545|Eurotiomycetes,3S5Q6@5042|Eurotiales	4751|Fungi	O	Thioredoxin	-	K03671
qsublack_gene_776	12155.7	14542.6	34438	1.19635	2.83307	2.36809	0.165494	0.000205677	7.57756e-05	0.527292	0.177283	0.00140166	0.00018245	0.0172216	Au+	1.16e-43	KOG3489@1|root,KOG3489@2759|Eukaryota,3A8VF@33154|Opisthokonta,3P6QF@4751|Fungi,3QX9N@4890|Ascomycota,20S6Z@147545|Eurotiomycetes,3SF39@5042|Eurotiales	4751|Fungi	U	Tim10/DDP family zinc finger	-	K17780
qsublack_gene_853	23545.1	6265.47	78238.8	0.266105	3.32293	12.4873	0.0185434	0.0089307	0.000129901	0.188391	0.177283	0.00195787	0.000349153	0.0172216	Au+	9.12e-115	2CKZC@1|root,2S3WR@2759|Eukaryota,39WQG@33154|Opisthokonta,3P0VM@4751|Fungi,3QNTM@4890|Ascomycota,20DSZ@147545|Eurotiomycetes,3S4UM@5042|Eurotiales	4751|Fungi	S	Senescence-associated protein	-	K19366
qsublack_gene_1124	46246	15779.8	108709	0.341214	2.35066	6.8891	0.0524259	0.0232306	4.33004e-05	0.309444	0.192276	0.00102315	0.000570848	0.0172216	Au+	8.12e-202	COG4948@1|root,2QRWW@2759|Eukaryota,39TPC@33154|Opisthokonta,3NZ2Z@4751|Fungi,3QJU0@4890|Ascomycota,20E7C@147545|Eurotiomycetes,3S4BU@5042|Eurotiales	4751|Fungi	M	Mandelate racemase muconate lactonizing enzyme family protein	4.2.1.6	K01684
qsublack_gene_2708	213266	92097.9	390661	0.431845	1.8318	4.24181	0.035463	0.0146896	1.08251e-05	0.255676	0.182685	0.000574593	0.000255178	0.0172216	Au+	5.17e-12	COG0712@1|root,KOG1662@2759|Eukaryota,39SAW@33154|Opisthokonta,3NXBK@4751|Fungi,3QP98@4890|Ascomycota,3RU9J@4891|Saccharomycetes	4751|Fungi	C	Mitochondrial membrane ATP synthase (F(1)F(0) ATP synthase or Complex V) produces ATP from ADP in the presence of a proton gradient across the membrane which is generated by electron transport complexes of the respiratory chain. F-type ATPases consist of two structural domains, F(1) - containing the extramembraneous catalytic core, and F(0) - containing the membrane proton channel, linked togethe…	-	K02137
qsublack_gene_2982	30540	6282.42	83528.4	0.205711	2.73505	13.2956	0.0089307	0.0432571	2.16502e-05	0.140682	0.228284	0.000724144	0.000273946	0.0172216	Au+	5.1e-25	COG0638@1|root,KOG0863@2759|Eukaryota,38BYM@33154|Opisthokonta,3NW5C@4751|Fungi,3QJCU@4890|Ascomycota,20DH9@147545|Eurotiomycetes,3S5ZB@5042|Eurotiales	4751|Fungi	O	Proteasome subunit alpha type	3.4.25.1	K02725
qsublack_gene_3411	115981	50608.7	202605	0.436355	1.74689	4.00336	0.00519604	0.0146896	0.000129901	0.121601	0.182685	0.00195787	0.000255178	0.0172216	Au+	7.47e-112	28JKR@1|root,2QRZZ@2759|Eukaryota,38F5F@33154|Opisthokonta,3NYHJ@4751|Fungi,3QMNE@4890|Ascomycota,20EMJ@147545|Eurotiomycetes,3S5K3@5042|Eurotiales	4751|Fungi	G	Splits internally a 1,3-beta-glucan molecule and transfers the newly generated reducing end (the donor) to the non- reducing end of another 1,3-beta-glucan molecule (the acceptor) forming a 1,3-beta linkage, resulting in the elongation of 1,3- beta-glucan chains in the cell wall	-	-
qsublack_gene_3571	19445.8	7661.97	55807.5	0.394017	2.8699	7.2837	0.190316	0.0232306	0.000129901	0.555404	0.192276	0.00195787	0.00156177	0.0221138	Au+	1.29e-166	KOG1854@1|root,KOG1854@2759|Eukaryota,39J8V@33154|Opisthokonta,3Q3JX@4751|Fungi,3RKMN@4890|Ascomycota,20DTW@147545|Eurotiomycetes,3S4E4@5042|Eurotiales	4751|Fungi	M	Component of the MICOS complex, a large protein complex of the mitochondrial inner membrane that plays crucial roles in the maintenance of crista junctions, inner membrane architecture, and formation of contact sites to the outer membrane	-	K17785
qsublack_gene_3840	14353.2	5409.86	36617.3	0.376911	2.55116	6.76862	0.0432571	0.0185434	1.08251e-05	0.279663	0.186069	0.000574593	0.000313288	0.0172216	Au+	2.15e-54	COG0204@1|root,KOG1505@2759|Eukaryota,38DTT@33154|Opisthokonta,3NV8M@4751|Fungi,3QS1M@4890|Ascomycota,20AD9@147545|Eurotiomycetes,3S5B4@5042|Eurotiales	4751|Fungi	I	Acyltransferase	-	-
qsublack_gene_3988	44895.9	17457.9	104595	0.388852	2.32973	5.99131	0.105122	0.0185434	4.33004e-05	0.428982	0.186069	0.00102315	0.000717312	0.0178112	Au+	1.76e-185	COG0152@1|root,KOG2835@2759|Eukaryota,38BXP@33154|Opisthokonta,3NVQW@4751|Fungi,3QJN7@4890|Ascomycota,20CTY@147545|Eurotiomycetes,3S2Q7@5042|Eurotiales	4751|Fungi	F	Phosphoribosyl-aminoimidazole-succinocarboxamide synthase	6.3.2.6	K01923
qsublack_gene_3996	77858.8	27681.9	214797	0.35554	2.7588	7.75947	0.075256	0.00519604	2.16502e-05	0.366523	0.177283	0.000724144	0.000276788	0.0172216	Au+	2.97e-167	COG0149@1|root,KOG1643@2759|Eukaryota,39XNN@33154|Opisthokonta,3P102@4751|Fungi,3QPHH@4890|Ascomycota,20SXT@147545|Eurotiomycetes,3S464@5042|Eurotiales	4751|Fungi	G	triosephosphate isomerase	5.3.1.1	K01803
qsublack_gene_4124	142835	45464.7	314809	0.318302	2.204	6.92424	0.0630128	0.0630128	0.000324753	0.339389	0.262853	0.00350857	0.00214798	0.0251342	Au+	4.7e-137	COG1063@1|root,KOG0024@2759|Eukaryota,38BYX@33154|Opisthokonta,3NU8H@4751|Fungi,3QNCA@4890|Ascomycota,20AV9@147545|Eurotiomycetes,3S397@5042|Eurotiales	4751|Fungi	Q	Xylitol dehydrogenase which catalyzes the conversion of xylitol to D-xylulose. Xylose is a major component of hemicelluloses such as xylan. Most fungi utilize D-xylose via three enzymatic reactions, xylose reductase (XR), xylitol dehydrogenase (XDH), and xylulokinase, to form xylulose 5- phosphate, which enters pentose phosphate pathway (By similarity)	1.1.1.14,1.1.1.9	K00008,K05351
qsublack_gene_4320	109816	53726.6	218544	0.489244	1.9901	4.0677	0.105122	0.0185434	1.08251e-05	0.428982	0.186069	0.000574593	0.000485818	0.0172216	Au+	4.29e-183	COG1155@1|root,KOG1352@2759|Eukaryota,3AJZ9@33154|Opisthokonta,3Q3J7@4751|Fungi,3RKKQ@4890|Ascomycota,20FV1@147545|Eurotiomycetes,3S7QN@5042|Eurotiales	4751|Fungi	C	Vacuolar ATP synthase catalytic subunit A	3.6.3.14	K02145
qsublack_gene_4426	92934.5	61388	252445	0.660552	2.71638	4.11229	0.123005	0.075256	0.00208924	0.458299	0.283857	0.0138998	0.0075287	0.0482463	Au+	1.97e-35	COG0656@1|root,KOG1577@2759|Eukaryota,38HH0@33154|Opisthokonta,3NU9F@4751|Fungi,3QMTS@4890|Ascomycota,20E2V@147545|Eurotiomycetes,3S6CQ@5042|Eurotiales	4751|Fungi	S	reductase	1.1.1.372	K18107
qsublack_gene_4438	47562.9	14832.4	140350	0.311847	2.95083	9.4624	0.190316	0.0232306	0.00208924	0.555404	0.192276	0.0138998	0.00519195	0.0388678	Au+	1.73e-247	COG1012@1|root,KOG2451@2759|Eukaryota,38D8C@33154|Opisthokonta,3NVW2@4751|Fungi,3QNK0@4890|Ascomycota,20AUH@147545|Eurotiomycetes,3S7DY@5042|Eurotiales	4751|Fungi	C	Succinate-semialdehyde dehydrogenase	1.2.1.16,1.2.1.20,1.2.1.79	K00135
qsublack_gene_4673	113116	35903.2	291302	0.317402	2.57526	8.11356	0.314999	0.0288056	7.57756e-05	0.689797	0.203276	0.00140166	0.00188796	0.0238436	Au+	1.13e-107	COG5580@1|root,KOG2936@2759|Eukaryota,39P2Y@33154|Opisthokonta,3NVRU@4751|Fungi,3QJUU@4890|Ascomycota,20CM0@147545|Eurotiomycetes,3S3GI@5042|Eurotiales	4751|Fungi	O	Aha1 domain family	-	-
qsublack_gene_4938	328035	168588	639455	0.513933	1.94935	3.793	0.075256	0.0185434	4.33004e-05	0.366523	0.186069	0.00102315	0.000609677	0.0172216	Au+	5.07e-180	COG5069@1|root,KOG0046@2759|Eukaryota,38BRY@33154|Opisthokonta,3NW26@4751|Fungi,3QKKG@4890|Ascomycota,20CZW@147545|Eurotiomycetes,3AZJY@33183|Onygenales,3FK53@34383|Onygenales incertae sedis	4751|Fungi	Z	Calponin homology domain	-	K17275
qsublack_gene_5084	100895	45407.4	235067	0.450046	2.32982	5.17684	0.075256	0.00388621	7.57756e-05	0.366523	0.177283	0.00140166	0.000365754	0.0172216	Au+	1.83e-18	COG0469@1|root,KOG2323@2759|Eukaryota,38BPM@33154|Opisthokonta,3NUBE@4751|Fungi,3QP88@4890|Ascomycota	4751|Fungi	G	Belongs to the pyruvate kinase family	2.7.1.40	K00873
qsublack_gene_5393	241480	116801	404585	0.48369	1.67544	3.46387	0.0432571	0.035463	0.000205677	0.279663	0.214861	0.00258863	0.00113262	0.0199913	Au+	1.17e-72	COG0039@1|root,KOG1494@2759|Eukaryota,38EX2@33154|Opisthokonta,3NWAG@4751|Fungi,3QJNJ@4890|Ascomycota,20B8S@147545|Eurotiomycetes,3S3RY@5042|Eurotiales	4751|Fungi	C	Belongs to the LDH MDH superfamily	1.1.1.37	K00026
qsublack_gene_5532	68045.2	35433.7	174750	0.520737	2.56815	4.93175	0.217563	0.00150469	1.08251e-05	0.588496	0.177283	0.000574593	0.00021109	0.0172216	Au+	3.77e-254	KOG0123@1|root,KOG0123@2759|Eukaryota,38F9F@33154|Opisthokonta,3NXFC@4751|Fungi,3QK28@4890|Ascomycota,20AXF@147545|Eurotiomycetes,3S4NZ@5042|Eurotiales	4751|Fungi	A	Binds the poly(A) tail of mRNA. Appears to be an important mediator of the multiple roles of the poly(A) tail in mRNA biogenesis, stability and translation. In the nucleus, involved in both mRNA cleavage and polyadenylation. Is also required for efficient mRNA export to the cytoplasm. Acts in concert with a poly(A)-specific nuclease (PAN) to affect poly(A) tail shortening, which may occur concomi…	-	K13126
qsublack_gene_5711	19992.8	7621.98	53771.6	0.381236	2.68954	7.0548	0.165494	0.0232306	0.000725281	0.527292	0.192276	0.00633972	0.00295805	0.0290842	Au+	4.75e-107	COG0076@1|root,KOG1383@2759|Eukaryota,38HST@33154|Opisthokonta,3NUJY@4751|Fungi,3QN1N@4890|Ascomycota,20D3H@147545|Eurotiomycetes,3MTTK@451870|Chaetothyriomycetidae	4751|Fungi	E	Belongs to the group II decarboxylase family	4.1.1.15	K01580
qsublack_gene_5822	57540.2	33533.1	180874	0.582777	3.14344	5.3939	0.481251	0.00388621	0.000487129	0.791994	0.177283	0.00477035	0.00164237	0.0224867	Au+	2.75e-72	COG1012@1|root,KOG2451@2759|Eukaryota,3AIFC@33154|Opisthokonta,3P05T@4751|Fungi,3RKT3@4890|Ascomycota,20DGD@147545|Eurotiomycetes,3S31K@5042|Eurotiales	4751|Fungi	C	Dehydrogenase	-	-
qsublack_gene_6120	112488	88037.4	264040	0.782636	2.34727	2.99918	0.853428	0.00684146	0.000324753	0.959386	0.177283	0.00350857	0.00221554	0.0256786	Au+	2.72e-102	COG2376@1|root,KOG2426@2759|Eukaryota,38CK2@33154|Opisthokonta,3NUS7@4751|Fungi,3QN88@4890|Ascomycota,20CGF@147545|Eurotiomycetes,3S5D5@5042|Eurotiales	4751|Fungi	G	Dihydroxyacetone kinase	2.7.1.28,2.7.1.29,4.6.1.15	K00863
qsublack_gene_6122	31856.7	25593.6	73915.9	0.803399	2.32026	2.88806	0.795936	0.0185434	0.00150469	0.941727	0.186069	0.0106594	0.00693196	0.0459101	Au+	1.84e-72	COG2376@1|root,KOG2426@2759|Eukaryota,38CK2@33154|Opisthokonta,3NUS7@4751|Fungi,3QN88@4890|Ascomycota,20CGF@147545|Eurotiomycetes,3B0J6@33183|Onygenales,3FM98@34383|Onygenales incertae sedis	4751|Fungi	G	Dihydroxyacetone kinase	2.7.1.28,2.7.1.29,4.6.1.15	K00863
qsublack_gene_6151	101678	70214.9	205754	0.690562	2.02358	2.93034	0.795936	0.0185434	7.57756e-05	0.941727	0.186069	0.00140166	0.00230299	0.0259929	Au+	1.97e-127	COG1024@1|root,KOG1680@2759|Eukaryota,38F58@33154|Opisthokonta,3NTZK@4751|Fungi,3QKS3@4890|Ascomycota,20CVD@147545|Eurotiomycetes,3S73Z@5042|Eurotiales	4751|Fungi	I	Belongs to the enoyl-CoA hydratase isomerase family	4.2.1.17	K07511
qsublack_gene_6304	17117.7	7274.56	48164	0.424972	2.81369	6.62088	1	0.0114962	0.00150469	1	0.17917	0.0106594	0.00566809	0.040625	Au+	1.74e-55	KOG1962@1|root,KOG1962@2759|Eukaryota,39VIV@33154|Opisthokonta,3NZWT@4751|Fungi,3QSW4@4890|Ascomycota,20DR2@147545|Eurotiomycetes,3AZ5X@33183|Onygenales,3FUED@34384|Arthrodermataceae	4751|Fungi	V	B-cell receptor-associated protein 31-like	-	K14009,K20405
qsublack_gene_6482	26620.4	22514.8	60050.1	0.845772	2.25579	2.66713	0.528849	0.000324753	4.33004e-05	0.821246	0.177283	0.00102315	0.000237084	0.0172216	Au+	1.47e-284	COG0129@1|root,KOG2448@2759|Eukaryota,38F28@33154|Opisthokonta,3NUBR@4751|Fungi,3QK1W@4890|Ascomycota,20B43@147545|Eurotiomycetes,3S7F2@5042|Eurotiales	4751|Fungi	E	dehydratase	4.2.1.9	K01687
qsublack_gene_7210	72235.2	40302	154232	0.557927	2.13514	3.82691	0.279861	0.035463	7.57756e-05	0.655994	0.214861	0.00140166	0.0019931	0.0244676	Au+	9.49e-24	2CZ50@1|root,2S8FH@2759|Eukaryota,39JVJ@33154|Opisthokonta,3Q47T@4751|Fungi,3RMDJ@4890|Ascomycota,20TSW@147545|Eurotiomycetes,3S975@5042|Eurotiales	4751|Fungi	S	SCP-2 sterol transfer family	-	-
qsublack_gene_7238	8184.29	6132.47	20999	0.749298	2.56577	3.42424	0.393048	0.00684146	0.00150469	0.732217	0.177283	0.0106594	0.00329668	0.0305287	Au+	2.68e-49	COG1853@1|root,2QT1K@2759|Eukaryota,38FE3@33154|Opisthokonta,3NY57@4751|Fungi,3QNUV@4890|Ascomycota,20DN5@147545|Eurotiomycetes,3MRPS@451870|Chaetothyriomycetidae	4751|Fungi	S	Flavin reductase like domain	-	-
qsublack_gene_7449	71267.8	40309.1	128230	0.565601	1.79927	3.18116	0.0524259	0.035463	1.08251e-05	0.309444	0.214861	0.000574593	0.000474052	0.0172216	Au+	2.44e-65	COG1877@1|root,KOG1050@2759|Eukaryota,38EGS@33154|Opisthokonta,3NUM3@4751|Fungi,3QP00@4890|Ascomycota,20CBJ@147545|Eurotiomycetes,3S48D@5042|Eurotiales	4751|Fungi	H	Alpha,alpha-trehalose-phosphate synthase	2.4.1.15,2.4.1.347	K00697
qsublack_gene_7475	42196.2	15966.4	80709.5	0.378384	1.91272	5.05497	0.0089307	0.0185434	1.08251e-05	0.140682	0.186069	0.000574593	0.000152101	0.0172216	Au+	1.13e-50	KOG1693@1|root,KOG1693@2759|Eukaryota,38GKP@33154|Opisthokonta,3NV0D@4751|Fungi,3QNWN@4890|Ascomycota,20CVG@147545|Eurotiomycetes,3S2ND@5042|Eurotiales	4751|Fungi	U	Endosomal cargo receptor (Erp3)	-	K14825
qsublack_gene_7601	265923	107175	370118	0.403031	1.39182	3.45339	0.00684146	0.247451	0.000129901	0.131532	0.528602	0.00195787	0.000962664	0.0190068	Au+	3.41e-42	COG0638@1|root,KOG0183@2759|Eukaryota,38CHW@33154|Opisthokonta,3NWE5@4751|Fungi,3QKNP@4890|Ascomycota,20BAK@147545|Eurotiomycetes,3S6ND@5042|Eurotiales	4751|Fungi	O	Proteasome subunit alpha type	3.4.25.1	K02731
qsublack_gene_7910	39647.4	15876.8	88283.9	0.40045	2.22673	5.56057	0.0232306	0.0232306	0.000324753	0.208025	0.192276	0.00350857	0.000853806	0.0180413	Au+	3.99e-277	COG0647@1|root,KOG1618@2759|Eukaryota,39SVY@33154|Opisthokonta,3NWHC@4751|Fungi,3QKZM@4890|Ascomycota,20FTA@147545|Eurotiomycetes,3S34X@5042|Eurotiales	4751|Fungi	G	Haloacid dehalogenase-like hydrolase	-	-
qsublack_gene_7972	52648.4	24070.7	118479	0.457197	2.25038	4.92213	0.0892096	0.0089307	2.16502e-05	0.396036	0.177283	0.000724144	0.000383145	0.0172216	Au+	0	COG1034@1|root,KOG2282@2759|Eukaryota,38DHR@33154|Opisthokonta,3NW5Z@4751|Fungi,3QJRY@4890|Ascomycota,20C1U@147545|Eurotiomycetes,3S7Z8@5042|Eurotiales	4751|Fungi	C	Belongs to the complex I 75 kDa subunit family	1.6.5.3,1.6.99.3	K03934
qsublack_gene_8090	75987	52408.8	151791	0.689707	1.9976	2.8963	0.528849	0.00684146	0.000129901	0.821246	0.177283	0.00195787	0.00133257	0.0209916	Au+	3.55e-60	COG0112@1|root,KOG2467@2759|Eukaryota,38EKT@33154|Opisthokonta,3NVHZ@4751|Fungi,3QKZB@4890|Ascomycota,20C46@147545|Eurotiomycetes,3MQKP@451870|Chaetothyriomycetidae	4751|Fungi	H	Interconversion of serine and glycine	2.1.2.1	K00600
qsublack_gene_8398	28319.7	6663.86	101708	0.235308	3.5914	15.2626	0.035463	0.00684146	4.33004e-05	0.255676	0.177283	0.00102315	0.000273946	0.0172216	Au+	0	COG0060@1|root,KOG0434@2759|Eukaryota,38CIS@33154|Opisthokonta,3NVSZ@4751|Fungi,3QMG7@4890|Ascomycota,20C37@147545|Eurotiomycetes,3S7RA@5042|Eurotiales	4751|Fungi	J	Belongs to the class-I aminoacyl-tRNA synthetase family	6.1.1.5	K01870
qsublack_gene_8484	40571.3	9946.64	126481	0.245164	3.1175	12.716	0.105122	0.00684146	2.16502e-05	0.428982	0.177283	0.000724144	0.000365754	0.0172216	Au+	5.46e-52	COG0308@1|root,KOG1046@2759|Eukaryota,38CFG@33154|Opisthokonta,3NWST@4751|Fungi,3QMW3@4890|Ascomycota,214HF@147550|Sordariomycetes,3TH7P@5125|Hypocreales,1FNIZ@110618|Nectriaceae	4751|Fungi	EO	to aminopeptidase B	-	-
qsublack_gene_8487	23831.6	14420.6	70713.2	0.605104	2.96721	4.90363	0.911797	0.00519604	4.33004e-05	0.975879	0.177283	0.00102315	0.000996793	0.0193855	Au+	2.18e-53	COG0308@1|root,KOG1046@2759|Eukaryota,38CFG@33154|Opisthokonta,3NWST@4751|Fungi,3QMW3@4890|Ascomycota,214HF@147550|Sordariomycetes,3TH7P@5125|Hypocreales,1FNIZ@110618|Nectriaceae	4751|Fungi	EO	to aminopeptidase B	-	-
qsublack_gene_8489	17691.8	7074.32	47686.2	0.399865	2.69539	6.74075	0.165494	0.0089307	0.000725281	0.527292	0.177283	0.00633972	0.00188796	0.0238436	Au+	3.74e-25	COG0308@1|root,KOG1046@2759|Eukaryota,38CFG@33154|Opisthokonta,3NWST@4751|Fungi,3QMW3@4890|Ascomycota,214HF@147550|Sordariomycetes,3TH7P@5125|Hypocreales,1FNIZ@110618|Nectriaceae	4751|Fungi	EO	to aminopeptidase B	-	-
qsublack_gene_8624	748301	424592	1.50864e+06	0.567408	2.01608	3.55314	0.14314	0.0232306	0.000129901	0.497156	0.192276	0.00195787	0.00135861	0.0211662	Au+	0	COG0464@1|root,KOG0730@2759|Eukaryota,38BWW@33154|Opisthokonta,3NWIH@4751|Fungi,3QM44@4890|Ascomycota,20AMQ@147545|Eurotiomycetes,3S7KE@5042|Eurotiales	4751|Fungi	O	Belongs to the AAA ATPase family	-	K13525
qsublack_gene_10144	30405.3	15495.7	50166	0.509637	1.64991	3.23742	0.0089307	0.0524259	0.000324753	0.140682	0.245851	0.00350857	0.00080253	0.0179228	Au+	3.76e-221	COG0192@1|root,KOG1506@2759|Eukaryota,38DWH@33154|Opisthokonta,3NUD5@4751|Fungi,3QM99@4890|Ascomycota,20BD5@147545|Eurotiomycetes,3S45B@5042|Eurotiales	4751|Fungi	H	Catalyzes the formation of S-adenosylmethionine from methionine and ATP	2.5.1.6	K00789
qsublack_gene_10459	32723.8	11030.7	65517.6	0.337087	2.00214	5.93954	0.0232306	0.0630128	2.16502e-05	0.208025	0.262853	0.000724144	0.000512872	0.0172216	Au+	3.15e-265	COG0405@1|root,KOG2410@2759|Eukaryota,38ENY@33154|Opisthokonta,3NVWF@4751|Fungi,3QK7J@4890|Ascomycota,20EAS@147545|Eurotiomycetes,3S6WU@5042|Eurotiales	4751|Fungi	E	Gamma-glutamyltranspeptidase	2.3.2.2,3.4.19.13	K00681
qsublack_gene_11160	155959	74975.6	301453	0.480739	1.9329	4.02068	0.0288056	0.035463	0.000129901	0.230602	0.214861	0.00195787	0.000775052	0.0178661	Au+	8.98e-38	KOG3434@1|root,KOG3434@2759|Eukaryota,3A5RD@33154|Opisthokonta,3P2WB@4751|Fungi,3QV1A@4890|Ascomycota,20HE6@147545|Eurotiomycetes,3S8X3@5042|Eurotiales	4751|Fungi	J	60S ribosomal protein L22	-	K02891
qsublack_gene_11208	31623.8	7180.53	97918.8	0.227061	3.09637	13.6367	0.578742	0.0114962	0.00105003	0.846164	0.17917	0.00838767	0.00414787	0.034448	Au+	4.68e-36	COG5159@1|root,KOG1463@2759|Eukaryota,38GDJ@33154|Opisthokonta,3NU6M@4751|Fungi,3QJG8@4890|Ascomycota,20EG6@147545|Eurotiomycetes,3S3BQ@5042|Eurotiales	4751|Fungi	O	Proteasome regulatory particle subunit (RpnF)	-	K03036
qsublack_gene_11224	95034.8	51338.1	229315	0.540204	2.41295	4.46675	0.578742	0.0185434	0.000129901	0.846164	0.186069	0.00195787	0.00236319	0.0261936	Au+	5.32e-184	COG1109@1|root,KOG2537@2759|Eukaryota,38CHB@33154|Opisthokonta,3NV1D@4751|Fungi,3QM28@4890|Ascomycota,20E78@147545|Eurotiomycetes,3S4KU@5042|Eurotiales	4751|Fungi	G	Catalyzes the conversion of GlcNAc-6-P into GlcNAc-1-P during the synthesis of uridine diphosphate UDP-GlcNAc, which is a biosynthetic precursor of chitin and also supplies the amino sugars for N-linked oligosaccharides of glycoproteins	5.4.2.3	K01836
qsublack_gene_11232	9271.78	6028.79	28595.6	0.65023	3.08415	4.74317	0.035463	0.035463	0.00519604	0.255676	0.214861	0.0276405	0.00506621	0.0383368	Au+	4.93e-95	COG0500@1|root,KOG1499@2759|Eukaryota,38BN9@33154|Opisthokonta,3NV5S@4751|Fungi,3QN5A@4890|Ascomycota,20EET@147545|Eurotiomycetes,3B1WH@33183|Onygenales	4751|Fungi	H	Belongs to the class I-like SAM-binding methyltransferase superfamily. Protein arginine N- methyltransferase family	2.1.1.319	K11434
qsublack_gene_11234	32305.1	10232.9	95430.3	0.316757	2.95403	9.32586	0.279861	0.0185434	0.00150469	0.655994	0.186069	0.0106594	0.00465864	0.0366303	Au+	2.58e-57	COG2030@1|root,KOG1206@2759|Eukaryota,38D47@33154|Opisthokonta,3NV8E@4751|Fungi,3QKVW@4890|Ascomycota,20D6S@147545|Eurotiomycetes,3S5RE@5042|Eurotiales	4751|Fungi	I	MaoC like domain	-	-
qsublack_gene_11284	1.28967e+06	800096	2.28657e+06	0.620389	1.77299	2.85788	0.123005	0.0630128	0.000487129	0.458299	0.262853	0.00477035	0.00356665	0.0316675	Au+	3.02e-31	COG0055@1|root,KOG1350@2759|Eukaryota,38CQ6@33154|Opisthokonta,3NVU5@4751|Fungi,3QPGY@4890|Ascomycota,21182@147550|Sordariomycetes,3TFVG@5125|Hypocreales	4751|Fungi	C	Produces ATP from ADP in the presence of a proton gradient across the membrane	2.4.1.18,3.6.3.14	K00700,K02133
qsublack_gene_11287	14377.2	75668.4	41609	5.26309	2.8941	0.549886	2.16502e-05	0.247451	0.0232306	0.0132156	0.528602	0.0858116	0.00102947	0.0193855	Su+	2.36e-22	KOG1735@1|root,KOG1735@2759|Eukaryota,3A301@33154|Opisthokonta,3P59N@4751|Fungi,3QXCQ@4890|Ascomycota,20H5R@147545|Eurotiomycetes,3S8S5@5042|Eurotiales	4751|Fungi	Z	Belongs to the actin-binding proteins ADF family	-	K05765
qsublack_gene_11290	180753	21362.8	259764	0.118188	1.43712	12.1596	1.08251e-05	0.393048	1.08251e-05	0.0113277	0.669242	0.000574593	5.20542e-05	0.0172216	Au+Sp+	6.78e-27	KOG0406@1|root,KOG0406@2759|Eukaryota,3A0J7@33154|Opisthokonta,3P2DJ@4751|Fungi,3QRB9@4890|Ascomycota,20J6N@147545|Eurotiomycetes,3S74S@5042|Eurotiales	4751|Fungi	O	Glutathione S-transferase	2.5.1.18	K00799
qsublack_gene_11292	539408	203714	1.05953e+06	0.377663	1.96425	5.20107	0.0630128	0.123005	4.33004e-05	0.339389	0.367761	0.00102315	0.00147367	0.021757	Au+	2.2e-16	KOG0406@1|root,KOG0406@2759|Eukaryota,3A0J7@33154|Opisthokonta,3P2DJ@4751|Fungi,3QRB9@4890|Ascomycota,20J6N@147545|Eurotiomycetes,3S74S@5042|Eurotiales	4751|Fungi	O	Glutathione S-transferase	2.5.1.18	K00799
qsublack_gene_11304	897153	721202	2.01117e+06	0.803878	2.24172	2.78863	0.795936	0.00519604	0.000205677	0.941727	0.177283	0.00258863	0.00159229	0.0221777	Au+	1.98000000223083e-315	COG0459@1|root,KOG0356@2759|Eukaryota,38BJH@33154|Opisthokonta,3NY3W@4751|Fungi,3QQ98@4890|Ascomycota,20BDT@147545|Eurotiomycetes,3S3II@5042|Eurotiales	4751|Fungi	O	Belongs to the chaperonin (HSP60) family	-	K04077
qsublack_gene_11495	33976	7616.56	80983.9	0.224175	2.38356	10.6326	0.435872	0.0432571	0.000324753	0.762178	0.228284	0.00350857	0.00465864	0.0366303	Au+	6.8e-77	COG0327@1|root,KOG4131@2759|Eukaryota,39U3J@33154|Opisthokonta,3P0V5@4751|Fungi,3QPT2@4890|Ascomycota,20AHW@147545|Eurotiomycetes,3S3F8@5042|Eurotiales	4751|Fungi	S	NGG1 interacting factor Nif3	-	-
qsublack_gene_11935	25632.2	5948.81	47060.4	0.232083	1.83599	7.9109	0.0185434	0.075256	4.33004e-05	0.188391	0.283857	0.00102315	0.000609677	0.0172216	Au+	0	COG0474@1|root,KOG0205@2759|Eukaryota,38CYC@33154|Opisthokonta,3NUFA@4751|Fungi,3QJBC@4890|Ascomycota,20FPT@147545|Eurotiomycetes,3S7NA@5042|Eurotiales	4751|Fungi	P	Plasma membrane	3.6.3.6	K01535
qsublack_gene_11947	14447	6748.8	32153.9	0.467141	2.22565	4.7644	0.0232306	0.035463	4.33004e-05	0.208025	0.214861	0.00102315	0.000474052	0.0172216	Au+	8.08e-14	COG0695@1|root,KOG1752@2759|Eukaryota,3A8AE@33154|Opisthokonta,3P6QI@4751|Fungi,3QX82@4890|Ascomycota,202K7@147541|Dothideomycetes	4751|Fungi	O	Glutaredoxin	-	K03676
qsublack_gene_12136	107188	41821	207143	0.390164	1.93251	4.95308	0.0288056	0.0185434	7.57756e-05	0.230602	0.186069	0.00140166	0.000474052	0.0172216	Au+	2.9e-42	COG0365@1|root,KOG1175@2759|Eukaryota,38BR4@33154|Opisthokonta,3NUTI@4751|Fungi,3QM4K@4890|Ascomycota,21284@147550|Sordariomycetes,3U77R@5139|Sordariales,3HBPM@35718|Chaetomiaceae	4751|Fungi	I	acetyl-coenzyme A	6.2.1.1	K01895
qsublack_gene_12137	276608	131684	712289	0.476066	2.57508	5.40908	0.190316	0.00388621	0.000129901	0.555404	0.177283	0.00195787	0.000662162	0.0173226	Au+	0	COG0365@1|root,KOG1175@2759|Eukaryota,38BR4@33154|Opisthokonta,3NUTI@4751|Fungi,3QM4K@4890|Ascomycota,20B46@147545|Eurotiomycetes,3S414@5042|Eurotiales	4751|Fungi	I	Acetyl-coenzyme A synthetase	6.2.1.1	K01895
qsublack_gene_12502	156515	27562.5	256837	0.176102	1.64098	9.31835	0.000205677	0.165494	2.16502e-05	0.0627742	0.426096	0.000724144	0.000109455	0.0172216	Au+	4.2e-25	COG0049@1|root,KOG3291@2759|Eukaryota,38GCC@33154|Opisthokonta,3NVCP@4751|Fungi,3QNER@4890|Ascomycota,20FQV@147545|Eurotiomycetes,3MTSE@451870|Chaetothyriomycetidae	4751|Fungi	J	Belongs to the universal ribosomal protein uS7 family	-	K02989
qsublack_gene_12855	298731	152176	410632	0.509407	1.37459	2.69841	0.00287947	0.217563	0.00150469	0.109855	0.494768	0.0106594	0.00182567	0.0234615	Au+	1.55e-63	COG0148@1|root,KOG2670@2759|Eukaryota,38C66@33154|Opisthokonta,3NXC1@4751|Fungi,3QM10@4890|Ascomycota,20D50@147545|Eurotiomycetes,3S39B@5042|Eurotiales	4751|Fungi	G	Enolase allergen Asp F 22	4.2.1.11	K01689
qsublack_gene_12856	26475.7	7763.5	70868.8	0.293231	2.67675	9.12847	0.247451	0.0114962	7.57756e-05	0.622878	0.17917	0.00140166	0.00103213	0.0193855	Au+	2.04e-76	KOG4813@1|root,KOG4813@2759|Eukaryota,39S4V@33154|Opisthokonta,3NWVD@4751|Fungi,3QRMG@4890|Ascomycota,20E9M@147545|Eurotiomycetes,3S34C@5042|Eurotiales	4751|Fungi	J	component of the eukaryotic translation initiation factor 3 (eIF-3) complex, which is involved in protein synthesis of a specialized repertoire of mRNAs and, together with other initiation factors, stimulates binding of mRNA and methionyl-tRNAi to the 40S ribosome. The eIF-3 complex specifically targets and initiates translation of a subset of mRNAs involved in cell proliferation	-	K03245
qsublack_gene_12955	18100.1	6614.69	57148.6	0.365451	3.15737	8.63966	0.123005	0.0089307	7.57756e-05	0.458299	0.177283	0.00140166	0.000658753	0.0173226	Au+	0	COG0134@1|root,COG0135@1|root,COG0512@1|root,KOG0026@2759|Eukaryota,KOG4201@2759|Eukaryota,KOG4202@2759|Eukaryota,38FIR@33154|Opisthokonta,3NU49@4751|Fungi,3QKIC@4890|Ascomycota,20DP2@147545|Eurotiomycetes,3S4RU@5042|Eurotiales	4751|Fungi	E	Trifunctional enzyme bearing the Gln amidotransferase (GATase) domain of anthranilate synthase, indole-glycerolphosphate synthase, and phosphoribosylanthranilate isomerase activities	4.1.1.48,4.1.3.27,5.3.1.24	K01656,K13501
qsublack_gene_13117	35188.5	13176.5	100532	0.374455	2.85695	7.62961	0.795936	0.0089307	0.000725281	0.941727	0.177283	0.00633972	0.00344009	0.0312638	Au+	2.15e-247	KOG0318@1|root,KOG0318@2759|Eukaryota,38FD6@33154|Opisthokonta,3NVTV@4751|Fungi,3QM3P@4890|Ascomycota	4751|Fungi	Z	Actin cortical patch component	-	-
qsublack_gene_13584	74678.1	11027.3	180200	0.147664	2.41302	16.3413	0.14314	0.075256	0.00150469	0.497156	0.283857	0.0106594	0.00690518	0.0458156	Au+	2.14e-213	COG1902@1|root,KOG0134@2759|Eukaryota,39RM1@33154|Opisthokonta,3NUUE@4751|Fungi,3QM81@4890|Ascomycota,20C6F@147545|Eurotiomycetes,3S346@5042|Eurotiales	4751|Fungi	C	NADH-dependent flavin oxidoreductase	1.3.1.42	K05894
qsublack_gene_13594	20263.3	9185.86	64163.3	0.453325	3.16648	6.98501	0.314999	0.0114962	0.00150469	0.689797	0.17917	0.0106594	0.00387869	0.0333467	Au+	8.9e-41	COG1087@1|root,KOG1371@2759|Eukaryota,38C46@33154|Opisthokonta,3NVGX@4751|Fungi,3QKVK@4890|Ascomycota,20F6E@147545|Eurotiomycetes,3S78R@5042|Eurotiales	4751|Fungi	Q	UDPglucose 4-epimerase	5.1.3.2,5.1.3.3	K01784,K01785
qsublack_gene_13716	80755.9	31850.6	224422	0.394405	2.77902	7.0461	0.970512	0.0146896	0.000487129	0.990388	0.182685	0.00477035	0.00421259	0.0345279	Au+	6.19e-107	COG0604@1|root,KOG1198@2759|Eukaryota,38GB8@33154|Opisthokonta,3NZFE@4751|Fungi,3QPB1@4890|Ascomycota,20E5N@147545|Eurotiomycetes,3S87S@5042|Eurotiales	4751|Fungi	C	Quinone oxidoreductase	1.6.5.5	K00344
qsublack_gene_13838	20097	13913.4	54320.2	0.692309	2.7029	3.90418	0.911797	0.00684146	0.000487129	0.975879	0.177283	0.00477035	0.00275896	0.0280436	Au+	8.98e-208	KOG3655@1|root,KOG3655@2759|Eukaryota,38FWX@33154|Opisthokonta,3NUCT@4751|Fungi,3QQJS@4890|Ascomycota,20AEU@147545|Eurotiomycetes,3S62D@5042|Eurotiales	4751|Fungi	Z	Actin binding protein	-	K20520
qsublack_gene_13840	87737.9	52684.9	170427	0.60048	1.94246	3.23484	0.247451	0.0288056	0.000324753	0.622878	0.203276	0.00350857	0.00282378	0.0282571	Au+	0	COG0699@1|root,KOG0446@2759|Eukaryota,38C4B@33154|Opisthokonta,3NU71@4751|Fungi,3QPTX@4890|Ascomycota,20CFR@147545|Eurotiomycetes,3S3EB@5042|Eurotiales	4751|Fungi	U	Belongs to the TRAFAC class dynamin-like GTPase superfamily. Dynamin Fzo YdjA family	3.6.5.5	K17065
qsublack_gene_13899	49737.2	21096.5	190477	0.42416	3.82968	9.02884	0.630529	0.0089307	0.00388621	0.869797	0.177283	0.0222394	0.00693196	0.0459101	Au+	4.01e-125	COG5101@1|root,KOG2020@2759|Eukaryota,38D8Y@33154|Opisthokonta,3NX17@4751|Fungi,3QPXF@4890|Ascomycota,20C77@147545|Eurotiomycetes,3S5HB@5042|Eurotiales	4751|Fungi	UY	Exportin KapK	-	K14290
qsublack_gene_14194	31712.3	8666.29	99049.2	0.273279	3.12337	11.4293	0.0146896	0.00287947	2.16502e-05	0.169987	0.177283	0.000724144	0.000107357	0.0172216	Au+	1.83e-242	COG0436@1|root,KOG0258@2759|Eukaryota,38H3G@33154|Opisthokonta,3NU5I@4751|Fungi,3QKH6@4890|Ascomycota,20DMI@147545|Eurotiomycetes,3S4SR@5042|Eurotiales	4751|Fungi	E	alanine aminotransferase	2.6.1.2	K00814
qsublack_gene_14203	148843	92338.4	297508	0.620374	1.9988	3.22193	0.190316	0.00519604	0.000487129	0.555404	0.177283	0.00477035	0.0013121	0.0208484	Au+	1.26e-123	KOG4186@1|root,KOG4186@2759|Eukaryota,38B7Q@33154|Opisthokonta,3NWIA@4751|Fungi,3QM5K@4890|Ascomycota,20DAA@147545|Eurotiomycetes,3S6EC@5042|Eurotiales	4751|Fungi	U	Peroxisomal biogenesis factor	-	K13352
qsublack_gene_14713	13846.2	5705.68	44394.5	0.412074	3.20625	7.78076	0.0630128	0.0432571	0.00105003	0.339389	0.228284	0.00838767	0.0030393	0.0294068	Au+	1.64e-40	COG0008@1|root,KOG1148@2759|Eukaryota,38CYZ@33154|Opisthokonta,3NUV0@4751|Fungi,3QKJ0@4890|Ascomycota,20D7H@147545|Eurotiomycetes,3B22I@33183|Onygenales	4751|Fungi	J	Belongs to the class-I aminoacyl-tRNA synthetase family	6.1.1.18	K01886
qsublack_gene_14819	27670.5	15351.9	55095	0.554812	1.99111	3.5888	0.684211	0.0232306	0.000487129	0.894493	0.192276	0.00477035	0.00470698	0.0367184	Au+	9.51e-28	COG5126@1|root,KOG0027@2759|Eukaryota,3A2RF@33154|Opisthokonta,3P1SU@4751|Fungi,3QU4U@4890|Ascomycota,20GXH@147545|Eurotiomycetes,3B32M@33183|Onygenales	4751|Fungi	T	Myosin regulatory light chain cdc4	-	-
qsublack_gene_15538	54582.6	21325.4	128841	0.390699	2.36047	6.04165	0.684211	0.0185434	1.08251e-05	0.894493	0.186069	0.000574593	0.00128197	0.0206838	Au+	1.19e-140	COG0592@1|root,KOG1636@2759|Eukaryota,38MVP@33154|Opisthokonta,3NXFV@4751|Fungi,3QN3Q@4890|Ascomycota,20E4M@147545|Eurotiomycetes,3S343@5042|Eurotiales	4751|Fungi	L	This protein is an auxiliary protein of DNA polymerase delta and is involved in the control of eukaryotic DNA replication by increasing the polymerase's processibility during elongation of the leading strand	-	K04802
qsublack_gene_15795	24437.2	9016.78	67993.5	0.368978	2.78238	7.54077	0.217563	0.0630128	0.000725281	0.588496	0.262853	0.00633972	0.00560988	0.0402866	Au+	4.23e-172	COG0191@1|root,KOG4153@2759|Eukaryota,39UZT@33154|Opisthokonta,3NUTZ@4751|Fungi,3QKE7@4890|Ascomycota,20DRX@147545|Eurotiomycetes,3S54G@5042|Eurotiales	4751|Fungi	G	fructose-bisphosphate aldolase	4.1.2.13	K01624
qsublack_gene_16331	19799.7	6143.71	41048.6	0.310293	2.0732	6.68141	0.0185434	0.14314	0.000205677	0.188391	0.394322	0.00258863	0.00145854	0.021757	Au+	2e-168	KOG3675@1|root,KOG3675@2759|Eukaryota,38E6G@33154|Opisthokonta,3NWHP@4751|Fungi,3QMR7@4890|Ascomycota,20E8C@147545|Eurotiomycetes,3S7YE@5042|Eurotiales	4751|Fungi	O	Belongs to the peptidase M49 family	3.4.14.4	K01277
qsublack_gene_16785	215193	93896.6	504302	0.436336	2.34349	5.37083	0.105122	0.0185434	0.000129901	0.428982	0.186069	0.00195787	0.00104824	0.0194388	Au+	1.25e-146	COG0192@1|root,KOG1506@2759|Eukaryota,38DWH@33154|Opisthokonta,3NUD5@4751|Fungi,3QM99@4890|Ascomycota,20BD5@147545|Eurotiomycetes,3S45B@5042|Eurotiales	4751|Fungi	H	Catalyzes the formation of S-adenosylmethionine from methionine and ATP	2.5.1.6	K00789
qsublack_gene_16992	38783.9	20219.8	118845	0.521345	3.06429	5.87766	0.795936	0.00105003	0.000487129	0.941727	0.177283	0.00477035	0.00104824	0.0194388	Au+	1.19e-48	COG0567@1|root,KOG0450@2759|Eukaryota,38FJ2@33154|Opisthokonta,3NV83@4751|Fungi,3QNW7@4890|Ascomycota,20B7S@147545|Eurotiomycetes,3S5EQ@5042|Eurotiales	4751|Fungi	C	Dehydrogenase	-	-
qsublack_gene_17087	35421.4	12049.1	93290.7	0.340164	2.63374	7.74256	0.739364	0.0232306	1.08251e-05	0.920279	0.192276	0.000574593	0.00152788	0.022031	Au+	1.9e-39	COG3485@1|root,2QWDJ@2759|Eukaryota,38CCW@33154|Opisthokonta,3NVIC@4751|Fungi,3QMK2@4890|Ascomycota,20CWS@147545|Eurotiomycetes,3S7QA@5042|Eurotiales	4751|Fungi	E	Catechol dioxygenase	-	-
qsublack_gene_17120	19737.5	8495.41	57461	0.430419	2.91126	6.76377	0.578742	0.00684146	1.08251e-05	0.846164	0.177283	0.000574593	0.000674233	0.0174514	Au+	1.48e-176	COG5391@1|root,KOG2273@2759|Eukaryota,38B4R@33154|Opisthokonta,3NUKF@4751|Fungi,3QKC3@4890|Ascomycota,20B3H@147545|Eurotiomycetes,3S3C5@5042|Eurotiales	4751|Fungi	U	Vacuolar protein sorting-associated protein Vps5	-	K17917
qsublack_gene_17124	52897.9	10985.7	134369	0.207678	2.54015	12.2312	0.075256	0.0232306	0.00150469	0.366523	0.192276	0.0106594	0.00294662	0.0290842	Au+	4.89e-38	KOG0675@1|root,KOG0675@2759|Eukaryota,38HTR@33154|Opisthokonta,3NV5M@4751|Fungi,3QM03@4890|Ascomycota,21888@147550|Sordariomycetes,1F0FG@1028384|Glomerellales	4751|Fungi	O	Calreticulin family	-	K08054
qsublack_gene_17125	59699.5	14939.2	208022	0.250239	3.48449	13.9246	0.190316	0.00684146	0.000129901	0.555404	0.177283	0.00195787	0.000857118	0.0180413	Au+	5.64e-57	KOG0675@1|root,KOG0675@2759|Eukaryota,38HTR@33154|Opisthokonta,3NV5M@4751|Fungi,3QM03@4890|Ascomycota,20FC5@147545|Eurotiomycetes,3S5JK@5042|Eurotiales	4751|Fungi	O	Calnexin	-	K08054
qsublack_gene_17126	69977.5	19086.7	190052	0.272754	2.7159	9.95733	0.578742	0.0146896	7.57756e-05	0.846164	0.182685	0.00140166	0.00174731	0.0230199	Au+	6.37e-57	KOG0675@1|root,KOG0675@2759|Eukaryota,38HTR@33154|Opisthokonta,3NV5M@4751|Fungi,3QM03@4890|Ascomycota,20FC5@147545|Eurotiomycetes,3S5JK@5042|Eurotiales	4751|Fungi	O	Calnexin	-	K08054
qsublack_gene_17268	1.34858e+06	693731	2.19283e+06	0.514415	1.62602	3.16092	0.105122	0.0892096	0.000205677	0.428982	0.310875	0.00258863	0.00279479	0.0280436	Au+	0	COG0443@1|root,KOG0100@2759|Eukaryota,38BPF@33154|Opisthokonta,3NUYW@4751|Fungi,3QRGR@4890|Ascomycota,20DZ2@147545|Eurotiomycetes,3S7VZ@5042|Eurotiales	4751|Fungi	O	Belongs to the heat shock protein 70 family	-	K09490
qsublack_gene_17297	126981	45475.9	301780	0.35813	2.37657	6.63605	0.123005	0.0288056	0.000129901	0.458299	0.203276	0.00195787	0.00140678	0.0214234	Au+	3.51e-163	COG0346@1|root,KOG2944@2759|Eukaryota,38CS6@33154|Opisthokonta,3NVC4@4751|Fungi,3QJCR@4890|Ascomycota,20CCG@147545|Eurotiomycetes,3S4CS@5042|Eurotiales	4751|Fungi	G	Catalyzes the conversion of hemimercaptal, formed from methylglyoxal and glutathione, to S-lactoylglutathione	4.4.1.5	K01759
qsublack_gene_17370	33783.5	11845.2	93587.8	0.350621	2.77022	7.90091	0.105122	0.00684146	0.000324753	0.428982	0.177283	0.00350857	0.000962664	0.0190068	Au+	2.22e-117	2E2NR@1|root,2S9VQ@2759|Eukaryota,39JAN@33154|Opisthokonta,3Q3MJ@4751|Fungi,3RKPD@4890|Ascomycota,20CMR@147545|Eurotiomycetes,3S2TW@5042|Eurotiales	4751|Fungi	I	AMP-binding enzyme	-	-
qsublack_gene_17644	23034.6	11536.9	53294	0.500848	2.31365	4.61945	0.0892096	0.0114962	2.16502e-05	0.396036	0.17917	0.000724144	0.000431995	0.0172216	Au+	0	COG0498@1|root,KOG2616@2759|Eukaryota,38DB9@33154|Opisthokonta,3NVIE@4751|Fungi,3QP82@4890|Ascomycota,20BU1@147545|Eurotiomycetes,3S4ZR@5042|Eurotiales	4751|Fungi	E	Threonine synthase	4.2.3.1	K01733
qsublack_gene_18347	37100.6	17940.8	73277	0.483572	1.97509	4.08438	0.075256	0.00519604	1.08251e-05	0.366523	0.177283	0.000574593	0.000225448	0.0172216	Au+	2.78e-154	COG0554@1|root,KOG0728@2759|Eukaryota,38EAQ@33154|Opisthokonta,3NV58@4751|Fungi,3QKB7@4890|Ascomycota,20BSP@147545|Eurotiomycetes,3S531@5042|Eurotiales	4751|Fungi	O	Belongs to the AAA ATPase family	-	K03066
qsublack_gene_18356	42650.4	23393.7	80722.1	0.548499	1.89265	3.4506	0.247451	0.0232306	0.000487129	0.622878	0.192276	0.00477035	0.00299646	0.029302	Au+	9.31e-91	COG0554@1|root,KOG2517@2759|Eukaryota,39S19@33154|Opisthokonta,3NWD0@4751|Fungi,3QKUX@4890|Ascomycota,20ECT@147545|Eurotiomycetes,3S6G0@5042|Eurotiales	4751|Fungi	G	FGGY-family carbohydrate kinase	-	-
qsublack_gene_18523	100721	47372.2	243849	0.470329	2.42103	5.14752	0.630529	0.0232306	0.000725281	0.869797	0.192276	0.00633972	0.00532768	0.0393797	Au+	4.97e-133	COG0459@1|root,KOG0364@2759|Eukaryota,38GPW@33154|Opisthokonta,3NV7S@4751|Fungi,3QMZ3@4890|Ascomycota,20AHA@147545|Eurotiomycetes,3S5TP@5042|Eurotiales	4751|Fungi	O	assists the folding of proteins upon ATP hydrolysis	-	K09495
qsublack_gene_18524	95771.8	47453.7	224442	0.495487	2.34351	4.72971	0.578742	0.0288056	0.00105003	0.846164	0.203276	0.00838767	0.00677281	0.0450598	Au+	3.36e-99	COG0459@1|root,KOG0364@2759|Eukaryota,38GPW@33154|Opisthokonta,3NV7S@4751|Fungi,3QMZ3@4890|Ascomycota,20AHA@147545|Eurotiomycetes,3S5TP@5042|Eurotiales	4751|Fungi	O	assists the folding of proteins upon ATP hydrolysis	-	K09495
qsublack_gene_19005	15649.5	6943.67	42367.3	0.443699	2.70727	6.10158	0.0114962	0.0630128	0.00208924	0.154231	0.262853	0.0138998	0.00240938	0.0262629	Au+	4.6e-36	COG0576@1|root,KOG3003@2759|Eukaryota,39SYX@33154|Opisthokonta,3NZQR@4751|Fungi,3QM01@4890|Ascomycota,20FX1@147545|Eurotiomycetes,3S2PX@5042|Eurotiales	4751|Fungi	O	Essential component of the PAM complex, a complex required for the translocation of transit peptide-containing proteins from the inner membrane into the mitochondrial matrix in an ATP-dependent manner	-	K03687
qsublack_gene_19017	38234.4	13060	109179	0.341577	2.85552	8.35981	0.393048	0.0146896	0.000324753	0.732217	0.182685	0.00350857	0.00245964	0.0266128	Au+	0	KOG0307@1|root,KOG0307@2759|Eukaryota,3921I@33154|Opisthokonta,3NW7P@4751|Fungi,3QQ16@4890|Ascomycota,20C2W@147545|Eurotiomycetes,3S40J@5042|Eurotiales	4751|Fungi	U	Component of the coat protein complex II (COPII) which promotes the formation of transport vesicles from the endoplasmic reticulum (ER). The coat has two main functions, the physical deformation of the endoplasmic reticulum membrane into vesicles and the selection of cargo molecules (By similarity)	-	K14005
qsublack_gene_19381	43490.7	11033.3	91618.6	0.253692	2.10663	8.30387	0.0146896	0.035463	4.33004e-05	0.169987	0.214861	0.00102315	0.00038364	0.0172216	Au+	1.2e-54	KOG4093@1|root,KOG4093@2759|Eukaryota,3A40Y@33154|Opisthokonta,3P426@4751|Fungi,3QUB7@4890|Ascomycota,20H7K@147545|Eurotiomycetes,3S8NS@5042|Eurotiales	4751|Fungi	S	DUF757 domain protein	-	-
qsublack_gene_19453	79374	34805.6	204807	0.438502	2.58028	5.8843	0.435872	0.0089307	7.57756e-05	0.762178	0.177283	0.00140166	0.00117732	0.0202693	Au+	1.08e-298	COG1038@1|root,KOG0369@2759|Eukaryota,39RBB@33154|Opisthokonta,3NW8J@4751|Fungi,3QPPS@4890|Ascomycota,20E8Z@147545|Eurotiomycetes,3S4SC@5042|Eurotiales	4751|Fungi	C	Catalyzes a 2-step reaction, involving the ATP-dependent carboxylation of the covalently attached biotin in the first step and the transfer of the carboxyl group to pyruvate in the second	6.4.1.1	K01958
qsublack_gene_19487	115999	77823.5	265459	0.6709	2.28847	3.41104	0.481251	0.0089307	0.000205677	0.791994	0.177283	0.00258863	0.00174731	0.0230199	Au+	2.07e-92	COG3276@1|root,KOG0466@2759|Eukaryota,38FY1@33154|Opisthokonta,3NXAR@4751|Fungi,3QM0B@4890|Ascomycota,20AIH@147545|Eurotiomycetes,3S5EM@5042|Eurotiales	4751|Fungi	J	Translation initiation factor	-	K03242
qsublack_gene_19883	97721	50537.4	193137	0.51716	1.97641	3.82167	0.528849	0.0892096	4.33004e-05	0.821246	0.310875	0.00102315	0.0041909	0.0345279	Au+	5.76e-214	COG5277@1|root,KOG0678@2759|Eukaryota,38CVR@33154|Opisthokonta,3NW63@4751|Fungi,3QNBT@4890|Ascomycota,20FAR@147545|Eurotiomycetes,3S6WP@5042|Eurotiales	4751|Fungi	Z	Belongs to the actin family	-	K18584
qsublack_gene_20281	11826.2	6039.61	31048.3	0.510696	2.62538	5.14078	0.684211	0.0114962	0.000324753	0.894493	0.17917	0.00350857	0.00271656	0.0278305	Au+	0	COG0215@1|root,KOG2007@2759|Eukaryota,38C5C@33154|Opisthokonta,3NVK1@4751|Fungi,3QK1M@4890|Ascomycota,20FM7@147545|Eurotiomycetes,3S2WE@5042|Eurotiales	4751|Fungi	J	Cysteinyl-tRNA synthetase	6.1.1.16	K01883
qsublack_gene_20948	55606.5	23300.9	109595	0.419031	1.9709	4.70346	0.0432571	0.0089307	1.08251e-05	0.279663	0.177283	0.000574593	0.000222845	0.0172216	Au+	2.97e-83	COG0526@1|root,KOG0190@2759|Eukaryota,38GTB@33154|Opisthokonta,3NZ2W@4751|Fungi,3QJD6@4890|Ascomycota,20B16@147545|Eurotiomycetes,3S4KB@5042|Eurotiales	4751|Fungi	O	Protein disulfide isomerase	5.3.4.1	K09580
qsublack_gene_21436	165462	80307.7	286898	0.485354	1.73392	3.57248	0.0524259	0.0432571	0.000205677	0.309444	0.228284	0.00258863	0.00136388	0.0211662	Au+	9.69e-78	COG0508@1|root,KOG0559@2759|Eukaryota,38GEX@33154|Opisthokonta,3NX9F@4751|Fungi,3QJSJ@4890|Ascomycota,20BWC@147545|Eurotiomycetes,3S8FC@5042|Eurotiales	4751|Fungi	C	Dihydrolipoamide succinyltransferase	2.3.1.61	K00658
qsublack_gene_21479	724384	429393	1.86566e+06	0.592771	2.57551	4.34486	0.352681	0.00287947	4.33004e-05	0.716613	0.177283	0.00102315	0.000512872	0.0172216	Au+	3.45e-96	COG1063@1|root,KOG0024@2759|Eukaryota,38I3Q@33154|Opisthokonta,3NZVH@4751|Fungi,3QQ11@4890|Ascomycota,20DWE@147545|Eurotiomycetes,3B0QE@33183|Onygenales,3FMRN@34383|Onygenales incertae sedis	4751|Fungi	E	Glucose dehydrogenase C-terminus	1.1.1.287	K17818
qsublack_gene_21550	110663	45818.6	247241	0.414038	2.23418	5.39608	0.0630128	0.0288056	0.000205677	0.339389	0.203276	0.00258863	0.00122537	0.0202693	Au+	4.06e-253	COG0339@1|root,COG5020@1|root,KOG2089@2759|Eukaryota,KOG4472@2759|Eukaryota,38SFI@33154|Opisthokonta,3NX1E@4751|Fungi,3QJCH@4890|Ascomycota,20BAI@147545|Eurotiomycetes,3S3SR@5042|Eurotiales	4751|Fungi	O	Peptidase family M3	3.4.24.37	K01405,K13726
qsublack_gene_21658	258721	160679	584536	0.621051	2.25933	3.63791	0.684211	0.0114962	2.16502e-05	0.894493	0.17917	0.000724144	0.00115923	0.0201695	Au+	7.25e-58	COG5040@1|root,KOG0841@2759|Eukaryota,38CKG@33154|Opisthokonta,3NU75@4751|Fungi,3QQ0I@4890|Ascomycota,20BJP@147545|Eurotiomycetes,3S4C4@5042|Eurotiales	4751|Fungi	O	Belongs to the 14-3-3 family	-	K06630
qsublack_gene_21691	21825.2	9163.11	51289.1	0.419841	2.35	5.59735	0.739364	0.035463	0.000324753	0.920279	0.214861	0.00350857	0.00532768	0.0393797	Au+	1.75e-51	KOG3174@1|root,KOG3174@2759|Eukaryota,38E7G@33154|Opisthokonta,3NUTC@4751|Fungi,3QKF8@4890|Ascomycota,20G2F@147545|Eurotiomycetes,3S6GS@5042|Eurotiales	4751|Fungi	Z	F-actin capping protein beta subunit	-	K10365
qsublack_gene_21711	88640.3	29504.6	226719	0.332858	2.55774	7.68417	0.684211	0.0232306	2.16502e-05	0.894493	0.192276	0.000724144	0.00174731	0.0230199	Au+	2.96e-113	COG1028@1|root,KOG0725@2759|Eukaryota,39UA1@33154|Opisthokonta,3NV63@4751|Fungi,3QJNS@4890|Ascomycota,20EBT@147545|Eurotiomycetes,3S75Z@5042|Eurotiales	4751|Fungi	Q	Belongs to the short-chain dehydrogenases reductases (SDR) family	-	-
qsublack_gene_22468	98537.6	63241.7	181231	0.641803	1.83921	2.86569	0.247451	0.075256	0.00105003	0.622878	0.283857	0.00838767	0.00772552	0.0488261	Au+	5.69e-51	KOG0118@1|root,KOG0118@2759|Eukaryota,38I3K@33154|Opisthokonta,3NZQ5@4751|Fungi,3QMAU@4890|Ascomycota,20BRV@147545|Eurotiomycetes,3S2Z9@5042|Eurotiales	4751|Fungi	A	RNP domain protein	-	-
qsublack_gene_22607	14227.4	14685	36073.1	1.03216	2.53546	2.45645	0.795936	0.00388621	0.00388621	0.941727	0.177283	0.0222394	0.00489275	0.0375282	Au+	0	KOG1824@1|root,KOG1824@2759|Eukaryota,39JJQ@33154|Opisthokonta,3NVVP@4751|Fungi,3QJGU@4890|Ascomycota,20DZX@147545|Eurotiomycetes,3S7ZF@5042|Eurotiales	4751|Fungi	S	TATA-binding protein interacting (TIP20)	-	K17263
qsublack_gene_22821	9910.71	7837.05	26294.7	0.790765	2.65316	3.35518	0.853428	0.000725281	7.57756e-05	0.959386	0.177283	0.00140166	0.000468579	0.0172216	Au+	4.28e-165	COG1227@1|root,KOG4129@2759|Eukaryota,38HGT@33154|Opisthokonta,3P0WK@4751|Fungi,3QR58@4890|Ascomycota,20DCQ@147545|Eurotiomycetes,3S66Y@5042|Eurotiales	4751|Fungi	C	Exopolyphosphatase	3.6.1.11	K01514
qsublack_gene_22854	18523.3	6321.55	60202.7	0.341276	3.25011	9.52341	0.0432571	0.0524259	0.000725281	0.279663	0.245851	0.00633972	0.00234497	0.0261843	Au+	1.99e-197	COG0604@1|root,KOG0025@2759|Eukaryota,38GDB@33154|Opisthokonta,3NTWX@4751|Fungi,3QJBW@4890|Ascomycota,20B57@147545|Eurotiomycetes,3S3IP@5042|Eurotiales	4751|Fungi	CK	Mitochondrial enoyl reductase	1.3.1.38	K07512
qsublack_gene_23346	87770	52064.3	138583	0.59319	1.57894	2.66178	0.165494	0.0892096	0.000129901	0.527292	0.310875	0.00195787	0.00300421	0.029302	Au+	4.85e-281	COG4799@1|root,KOG0540@2759|Eukaryota,38ET3@33154|Opisthokonta,3NVWD@4751|Fungi,3QM1E@4890|Ascomycota,20FZM@147545|Eurotiomycetes,3S619@5042|Eurotiales	4751|Fungi	EI	3-methylcrotonyl-CoA carboxylase, beta subunit (MccB)	6.4.1.4	K01969
qsublack_gene_23448	46668.6	17871.6	139450	0.382948	2.9881	7.80289	0.684211	0.0114962	0.000324753	0.894493	0.17917	0.00350857	0.00271656	0.0278305	Au+	9.04e-112	COG2110@1|root,KOG2633@2759|Eukaryota,38JYP@33154|Opisthokonta,3NY56@4751|Fungi,3QP9U@4890|Ascomycota,20BN5@147545|Eurotiomycetes,3S5YY@5042|Eurotiales	4751|Fungi	BK	LRP16 family	-	-
qsublack_gene_23650	71354.4	25984.7	126870	0.364164	1.77803	4.8825	0.0185434	0.075256	4.33004e-05	0.188391	0.283857	0.00102315	0.000609677	0.0172216	Au+	9.11e-152	COG1028@1|root,KOG0725@2759|Eukaryota,38H5G@33154|Opisthokonta,3NWE0@4751|Fungi,3QQ0D@4890|Ascomycota,20FA3@147545|Eurotiomycetes,3S5MZ@5042|Eurotiales	4751|Fungi	Q	Short-chain dehydrogenase reductase family protein	-	-
qsublack_gene_24060	68859.4	41776.5	156042	0.606693	2.26609	3.73515	0.279861	0.0432571	0.00105003	0.655994	0.228284	0.00838767	0.00610068	0.0422777	Au+	5.33e-57	COG2030@1|root,2QPX4@2759|Eukaryota,39K2N@33154|Opisthokonta,3Q4FH@4751|Fungi,3RMNE@4890|Ascomycota,21RW5@147550|Sordariomycetes,1F7JZ@1028384|Glomerellales	4751|Fungi	Q	Enoyl-(Acyl carrier protein) reductase	1.1.1.35,4.2.1.107,4.2.1.119	K12405,K14729
qsublack_gene_24061	217807	90186.8	543695	0.414067	2.49622	6.02854	0.123005	0.0146896	4.33004e-05	0.458299	0.182685	0.00102315	0.000690075	0.0176126	Au+	1.63e-54	COG2030@1|root,KOG1206@2759|Eukaryota,38D3K@33154|Opisthokonta,3NV6Q@4751|Fungi,3QN9A@4890|Ascomycota,217II@147550|Sordariomycetes,1EWKD@1028384|Glomerellales	4751|Fungi	Q	Enoyl-(Acyl carrier protein) reductase	-	K14729
qsublack_gene_24062	182037	67945.2	601027	0.373249	3.30167	8.84577	0.578742	0.00519604	0.000725281	0.846164	0.177283	0.00633972	0.00237236	0.0261936	Au+	6.28e-41	COG2030@1|root,KOG1206@2759|Eukaryota,38D3K@33154|Opisthokonta,3NV6Q@4751|Fungi,3QN9A@4890|Ascomycota,20BK8@147545|Eurotiomycetes,3S5RS@5042|Eurotiales	4751|Fungi	Q	Peroxisomal multifunctional beta-oxidation protein	-	K14729
qsublack_gene_24121	160341	87237	561516	0.544072	3.50201	6.43667	1	0.00519604	0.00388621	1	0.177283	0.0222394	0.00575654	0.0408591	Au+	5.03e-69	KOG0767@1|root,KOG0767@2759|Eukaryota,38DBA@33154|Opisthokonta,3NWEF@4751|Fungi,3QJS1@4890|Ascomycota,20AXU@147545|Eurotiomycetes,3AZD7@33183|Onygenales	4751|Fungi	C	Belongs to the mitochondrial carrier (TC 2.A.29) family	-	K15102
qsublack_gene_24358	29213	8799.62	76824.4	0.301223	2.6298	8.73042	0.217563	0.0524259	0.00150469	0.588496	0.245851	0.0106594	0.00702198	0.0460896	Au+	2.64e-37	KOG3024@1|root,KOG3024@2759|Eukaryota,38I0Z@33154|Opisthokonta,3NY7P@4751|Fungi,3QMPT@4890|Ascomycota,20BNC@147545|Eurotiomycetes,3S88S@5042|Eurotiales	4751|Fungi	S	DUF410 domain protein	-	-
qsublack_gene_24408	87263.9	65842.1	202372	0.754518	2.31909	3.0736	0.970512	0.0089307	0.00105003	0.990388	0.177283	0.00838767	0.00421259	0.0345279	Au+	8.77e-88	KOG0767@1|root,KOG0767@2759|Eukaryota,38DBA@33154|Opisthokonta,3NTWE@4751|Fungi,3QJGG@4890|Ascomycota,20C93@147545|Eurotiomycetes,3S7VF@5042|Eurotiales	4751|Fungi	C	Belongs to the mitochondrial carrier (TC 2.A.29) family	-	K15102
qsublack_gene_24564	97978.6	46334.5	148682	0.472904	1.51749	3.20888	0.0432571	0.190316	0.000129901	0.279663	0.459935	0.00195787	0.00217027	0.0251937	Au+	3.85e-130	COG1222@1|root,KOG0727@2759|Eukaryota,39J9B@33154|Opisthokonta,3NUMF@4751|Fungi,3QN7G@4890|Ascomycota,20CW1@147545|Eurotiomycetes,3AZPZ@33183|Onygenales,3FUJW@34384|Arthrodermataceae	4751|Fungi	O	Belongs to the AAA ATPase family	-	K03063
qsublack_gene_24641	22512	13477.3	39699.3	0.598673	1.76347	2.94563	0.314999	0.0232306	0.000205677	0.689797	0.192276	0.00258863	0.00238156	0.0261936	Au+	6.68e-218	COG5159@1|root,KOG1463@2759|Eukaryota,38GDJ@33154|Opisthokonta,3NU6M@4751|Fungi,3QJG8@4890|Ascomycota,20EG6@147545|Eurotiomycetes,3S3BQ@5042|Eurotiales	4751|Fungi	O	Proteasome regulatory particle subunit (RpnF)	-	K03036
qsublack_gene_24657	23368.1	17378.2	48008.4	0.743675	2.05445	2.76256	0.217563	0.00208924	0.00287947	0.588496	0.177283	0.0177096	0.0022676	0.0258323	Au+	5.84e-102	COG1109@1|root,KOG2537@2759|Eukaryota,38CHB@33154|Opisthokonta,3NV1D@4751|Fungi,3QM28@4890|Ascomycota,20E78@147545|Eurotiomycetes,3S4KU@5042|Eurotiales	4751|Fungi	G	Catalyzes the conversion of GlcNAc-6-P into GlcNAc-1-P during the synthesis of uridine diphosphate UDP-GlcNAc, which is a biosynthetic precursor of chitin and also supplies the amino sugars for N-linked oligosaccharides of glycoproteins	5.4.2.3	K01836
qsublack_gene_25550	37036.2	13079.2	100093	0.353145	2.70256	7.65283	0.165494	0.0089307	4.33004e-05	0.527292	0.177283	0.00102315	0.000624003	0.0172216	Au+	0	COG5028@1|root,KOG1985@2759|Eukaryota,3AGJX@33154|Opisthokonta,3NVER@4751|Fungi,3QMVH@4890|Ascomycota,20AYI@147545|Eurotiomycetes,3S4UT@5042|Eurotiales	4751|Fungi	U	Component of the coat protein complex II (COPII) which promotes the formation of transport vesicles from the endoplasmic reticulum (ER). The coat has two main functions, the physical deformation of the endoplasmic reticulum membrane into vesicles and the selection of cargo molecules (By similarity)	-	K14007
qsublack_gene_25559	63183.2	29968.1	145842	0.474305	2.30825	4.86659	0.0630128	0.00208924	1.08251e-05	0.339389	0.177283	0.000574593	0.000141133	0.0172216	Au+	6.35e-61	COG0702@1|root,KOG2865@2759|Eukaryota,38G7B@33154|Opisthokonta,3NV96@4751|Fungi,3QNS2@4890|Ascomycota,20E6V@147545|Eurotiomycetes,3S3WB@5042|Eurotiales	4751|Fungi	C	NADH-ubiquinone oxidoreductase 39 kDa subunit	-	K03953
qsublack_gene_25768	142590	63146	389795	0.442849	2.73367	6.17291	0.435872	0.0185434	0.000725281	0.762178	0.186069	0.00633972	0.00405264	0.0339652	Au+	5.55e-43	28MYE@1|root,2QUH1@2759|Eukaryota,38DEZ@33154|Opisthokonta,3NWZI@4751|Fungi,3QP7C@4890|Ascomycota,20BFV@147545|Eurotiomycetes,3S31B@5042|Eurotiales	4751|Fungi	S	NAD binding Rossmann fold oxidoreductase	-	K18106
qsublack_gene_25770	48889.3	19890.3	142920	0.406845	2.92334	7.18539	0.739364	0.0232306	0.000324753	0.920279	0.192276	0.00350857	0.00414787	0.034448	Au+	7.54e-157	28MYE@1|root,2QUH1@2759|Eukaryota,38DEZ@33154|Opisthokonta,3NWZI@4751|Fungi,3QP7C@4890|Ascomycota,20BFV@147545|Eurotiomycetes,3S31B@5042|Eurotiales	4751|Fungi	S	NAD binding Rossmann fold oxidoreductase	-	K18106
qsublack_gene_25771	34767.1	7937.16	85824.4	0.228295	2.46855	10.813	0.035463	0.123005	0.000129901	0.255676	0.367761	0.00195787	0.00156379	0.0221138	Au+	7.96e-25	28MYE@1|root,2QUH1@2759|Eukaryota,38DEZ@33154|Opisthokonta,3NWZI@4751|Fungi,3QP7C@4890|Ascomycota,215I3@147550|Sordariomycetes,1EZMJ@1028384|Glomerellales	4751|Fungi	S	D-galacturonic acid reductase	-	K18106
qsublack_gene_25778	16619.7	7644.69	56900.7	0.459976	3.42368	7.44317	0.0892096	0.0089307	0.00150469	0.396036	0.177283	0.0106594	0.00208787	0.0249314	Au+	8.6e-59	COG5217@1|root,KOG3000@2759|Eukaryota,38BT8@33154|Opisthokonta,3NZ7G@4751|Fungi,3QMQP@4890|Ascomycota,20GB4@147545|Eurotiomycetes,3S7P1@5042|Eurotiales	4751|Fungi	Z	Microtubule associated protein EB1	-	K10436
qsublack_gene_25812	14948.8	6772.13	37659.2	0.453022	2.51921	5.56091	0.035463	0.0432571	0.00150469	0.255676	0.228284	0.0106594	0.00279479	0.0280436	Au+	1.58e-49	COG0631@1|root,KOG0698@2759|Eukaryota,39J7S@33154|Opisthokonta,3NUIN@4751|Fungi,3QJYA@4890|Ascomycota,20AMH@147545|Eurotiomycetes,3S42W@5042|Eurotiales	4751|Fungi	T	phosphatase 2C	3.1.3.16	K14803
qsublack_gene_25961	370828	173200	913528	0.467061	2.46348	5.27442	0.190316	0.0114962	7.57756e-05	0.555404	0.17917	0.00140166	0.000911882	0.0185472	Au+	9.1e-81	COG0183@1|root,KOG1389@2759|Eukaryota,38F89@33154|Opisthokonta,3NUEC@4751|Fungi,3QKZ9@4890|Ascomycota,20BK5@147545|Eurotiomycetes,3S2WV@5042|Eurotiales	4751|Fungi	I	Belongs to the thiolase family	2.3.1.16	K07513
qsublack_gene_26188	26431.9	14940.4	58282.1	0.565242	2.20499	3.90097	0.123005	0.035463	0.00208924	0.458299	0.214861	0.0138998	0.00524583	0.0389713	Au+	8.97e-78	COG0457@1|root,KOG0548@2759|Eukaryota,38GCK@33154|Opisthokonta,3NUK2@4751|Fungi,3QM6I@4890|Ascomycota,20DKT@147545|Eurotiomycetes,3S5WI@5042|Eurotiales	4751|Fungi	O	Heat shock protein (Sti1)	-	K09553
qsublack_gene_26303	1.05757e+06	600996	2.36801e+06	0.568282	2.23911	3.94014	0.165494	0.00208924	2.16502e-05	0.527292	0.177283	0.000724144	0.000264566	0.0172216	Au+	0	COG0443@1|root,KOG0102@2759|Eukaryota,38EJA@33154|Opisthokonta,3NVS1@4751|Fungi,3QP9J@4890|Ascomycota,20CQV@147545|Eurotiomycetes,3S41E@5042|Eurotiales	4751|Fungi	O	Belongs to the heat shock protein 70 family	-	K04043
qsublack_gene_26513	18814.6	8715.91	40241.1	0.463252	2.13882	4.61697	0.393048	0.0185434	0.000487129	0.732217	0.186069	0.00477035	0.00328819	0.0305272	Au+	1.53e-138	COG1501@1|root,KOG1066@2759|Eukaryota,3AJSB@33154|Opisthokonta,3NUB9@4751|Fungi,3QK5X@4890|Ascomycota,20EMG@147545|Eurotiomycetes,3S2MX@5042|Eurotiales	4751|Fungi	G	Belongs to the glycosyl hydrolase 31 family	3.2.1.84	K05546
qsublack_gene_26677	27017.8	6579.09	82411.6	0.243509	3.05027	12.5263	0.075256	0.0630128	0.000725281	0.366523	0.262853	0.00633972	0.0033223	0.0306112	Au+	1.72e-107	COG5184@1|root,KOG1426@2759|Eukaryota,39G0B@33154|Opisthokonta,3NVDB@4751|Fungi,3QMM5@4890|Ascomycota,20BHC@147545|Eurotiomycetes,3S3MQ@5042|Eurotiales	4751|Fungi	DZ	Ran exchange factor Prp20 Pim1	-	K11493
qsublack_gene_27060	54498.9	18472.7	108059	0.338956	1.98278	5.84966	0.0892096	0.0892096	4.33004e-05	0.396036	0.310875	0.00102315	0.00149666	0.0217954	Au+	5.28e-255	COG0459@1|root,KOG0359@2759|Eukaryota,38EFP@33154|Opisthokonta,3NVVE@4751|Fungi,3QNZU@4890|Ascomycota,20EHA@147545|Eurotiomycetes,3AZ07@33183|Onygenales,3FKBF@34383|Onygenales incertae sedis	4751|Fungi	O	assists the folding of proteins upon ATP hydrolysis	-	K09498
qsublack_gene_27080	38670.4	16943.3	71321.4	0.438146	1.84434	4.20943	0.393048	0.075256	0.000324753	0.732217	0.283857	0.00350857	0.00610068	0.0422777	Au+	4.94e-208	COG1208@1|root,KOG1322@2759|Eukaryota,38EU6@33154|Opisthokonta,3NTZ3@4751|Fungi,3QM7P@4890|Ascomycota,20ARK@147545|Eurotiomycetes,3S33H@5042|Eurotiales	4751|Fungi	H	mannose-1-phosphate	2.7.7.13	K00966
qsublack_gene_27100	154887	68657.7	446056	0.443276	2.87989	6.49682	0.853428	0.0114962	0.00208924	0.959386	0.17917	0.0138998	0.00632512	0.0435447	Au+	2.21e-179	COG0459@1|root,KOG0358@2759|Eukaryota,39NW1@33154|Opisthokonta,3NW0D@4751|Fungi,3QMH7@4890|Ascomycota,20E1T@147545|Eurotiomycetes,3S7P7@5042|Eurotiales	4751|Fungi	O	assists the folding of proteins upon ATP hydrolysis	-	K09496
qsublack_gene_27103	32155	19131.3	69625.9	0.594971	2.16532	3.63937	0.217563	0.0114962	0.000129901	0.588496	0.17917	0.00195787	0.00116824	0.0202085	Au+	1.87e-28	COG0554@1|root,KOG0729@2759|Eukaryota,38CT7@33154|Opisthokonta,3NVNZ@4751|Fungi,3QJVI@4890|Ascomycota,1ZY4Q@147541|Dothideomycetes,4KB9A@92860|Pleosporales	4751|Fungi	O	Belongs to the AAA ATPase family	-	K03061
qsublack_gene_27107	146206	61343.5	389968	0.41957	2.66725	6.35711	0.528849	0.00388621	7.57756e-05	0.821246	0.177283	0.00140166	0.000840688	0.0179939	Au+	0	COG1053@1|root,KOG2403@2759|Eukaryota,38CSD@33154|Opisthokonta,3NWM6@4751|Fungi,3QKVQ@4890|Ascomycota,20FSZ@147545|Eurotiomycetes,3S6BB@5042|Eurotiales	4751|Fungi	C	Flavoprotein (FP) subunit of succinate dehydrogenase (SDH) that is involved in complex II of the mitochondrial electron transport chain and is responsible for transferring electrons from succinate to ubiquinone (coenzyme Q)	1.3.5.1	K00234
qsublack_gene_27549	309889	140341	530183	0.452876	1.71088	3.77781	0.105122	0.165494	0.000205677	0.428982	0.426096	0.00258863	0.00390883	0.0334488	Au+	9.74e-104	COG0462@1|root,KOG0225@2759|Eukaryota,38G37@33154|Opisthokonta,3NUI6@4751|Fungi,3QPU2@4890|Ascomycota,20BWU@147545|Eurotiomycetes,3S32G@5042|Eurotiales	4751|Fungi	C	The pyruvate dehydrogenase complex catalyzes the overall conversion of pyruvate to acetyl-CoA and CO(2)	1.2.4.1	K00161
qsublack_gene_27694	365558	212180	565508	0.580428	1.54697	2.66522	0.0892096	0.165494	0.000205677	0.396036	0.426096	0.00258863	0.00356665	0.0316675	Au+	3.65e-201	COG0473@1|root,KOG0784@2759|Eukaryota,38EFS@33154|Opisthokonta,3NV6I@4751|Fungi,3QJW3@4890|Ascomycota,20AJ9@147545|Eurotiomycetes,3S5F8@5042|Eurotiales	4751|Fungi	C	Isocitrate dehydrogenase NAD subunit, mitochondrial	1.1.1.41	K00030
qsublack_gene_27734	33587.5	14190	86707.2	0.422479	2.58153	6.11044	0.165494	0.0288056	7.57756e-05	0.527292	0.203276	0.00140166	0.00135861	0.0211662	Au+	3.11e-69	2CY4Y@1|root,2S22D@2759|Eukaryota,3A3Z7@33154|Opisthokonta,3P415@4751|Fungi,3QUPJ@4890|Ascomycota,20HFN@147545|Eurotiomycetes,3S4KE@5042|Eurotiales	4751|Fungi	-	-	-	-
qsublack_gene_28044	54072.8	11561.3	166987	0.21381	3.08818	14.4436	0.279861	0.0232306	0.00150469	0.655994	0.192276	0.0106594	0.00520537	0.0388678	Au+	1.79e-93	COG4289@1|root,2QU9P@2759|Eukaryota,38HV4@33154|Opisthokonta,3NZ89@4751|Fungi,3QJIC@4890|Ascomycota,20CJM@147545|Eurotiomycetes,3S2ZQ@5042|Eurotiales	4751|Fungi	S	Uncharacterized protein conserved in bacteria (DUF2264)	-	-
qsublack_gene_28273	150741	62918.1	350706	0.417393	2.32655	5.57401	0.0288056	0.0232306	0.000205677	0.230602	0.192276	0.00258863	0.000775052	0.0178661	Au+	9.88e-71	COG0137@1|root,KOG1706@2759|Eukaryota,38BMZ@33154|Opisthokonta,3NWI9@4751|Fungi,3QM91@4890|Ascomycota,20E73@147545|Eurotiomycetes,3S3F4@5042|Eurotiales	4751|Fungi	E	argininosuccinate synthase	6.3.4.5	K01940
qsublack_gene_28465	334429	169671	527764	0.507346	1.5781	3.11051	0.0185434	0.165494	1.08251e-05	0.188391	0.426096	0.000574593	0.000612832	0.0172216	Au+	7.47e-128	KOG0181@1|root,KOG0181@2759|Eukaryota,38DNP@33154|Opisthokonta,3NTZH@4751|Fungi,3QKWB@4890|Ascomycota,20D8U@147545|Eurotiomycetes,3AZH0@33183|Onygenales,3FIYQ@34383|Onygenales incertae sedis	4751|Fungi	O	Proteasome subunit alpha type	3.4.25.1	K02726
qsublack_gene_28919	74652.2	40751.8	189912	0.545889	2.54396	4.66022	0.247451	0.00519604	4.33004e-05	0.622878	0.177283	0.00102315	0.000579756	0.0172216	Au+	3.86e-12	COG2513@1|root,KOG1260@2759|Eukaryota,37M2S@33090|Viridiplantae,3GBJH@35493|Streptophyta,3HS3D@3699|Brassicales	35493|Streptophyta	C	Belongs to the isocitrate lyase PEP mutase superfamily. Isocitrate lyase family	4.1.3.1	K01637
qsublack_gene_28922	83484.8	31636.4	174893	0.378948	2.09491	5.52823	0.0630128	0.0630128	0.000324753	0.339389	0.262853	0.00350857	0.00214798	0.0251342	Au+	9.68e-32	COG0372@1|root,KOG2617@2759|Eukaryota,38CK5@33154|Opisthokonta,3NU5Z@4751|Fungi,3QJB5@4890|Ascomycota,211B1@147550|Sordariomycetes,1F028@1028384|Glomerellales	4751|Fungi	H	Belongs to the citrate synthase family	2.3.3.1	K01647
qsublack_gene_29527	29605.6	9985.69	100207	0.337291	3.38472	10.035	0.14314	0.0185434	0.00388621	0.497156	0.186069	0.0222394	0.00575654	0.0408591	Au+	6e-41	KOG0118@1|root,KOG0118@2759|Eukaryota,38CF6@33154|Opisthokonta,3NW7K@4751|Fungi,3QMU9@4890|Ascomycota,20ATR@147545|Eurotiomycetes,3S32A@5042|Eurotiales	4751|Fungi	A	RNP domain protein	-	-
qsublack_gene_29620	32489.9	15817.3	120156	0.486839	3.69825	7.59647	1	0.000725281	1.08251e-05	1	0.177283	0.000574593	0.000271482	0.0172216	Au+	0	COG5324@1|root,2QQB9@2759|Eukaryota,38NQS@33154|Opisthokonta,3NUZY@4751|Fungi,3QNAM@4890|Ascomycota,20C9U@147545|Eurotiomycetes,3S6Q0@5042|Eurotiales	4751|Fungi	J	TRNA ligase	6.5.1.3	K14679
qsublack_gene_30424	16033.4	8932.86	47181.6	0.55714	2.9427	5.2818	0.739364	0.00150469	1.08251e-05	0.920279	0.177283	0.000574593	0.00034646	0.0172216	Au+	1.08e-51	COG5127@1|root,KOG2909@2759|Eukaryota,38C54@33154|Opisthokonta,3NVXU@4751|Fungi,3QQNF@4890|Ascomycota,20BC1@147545|Eurotiomycetes,3S4AK@5042|Eurotiales	4751|Fungi	C	Subunit of the peripheral V1 complex of vacuolar ATPase. Subunit C is necessary for the assembly of the catalytic sector of the enzyme and is likely to have a specific function in its catalytic activity. V-ATPase is responsible for acidifying a variety of intracellular compartments in eukaryotic cells	-	K02148
qsublack_gene_30744	61581.1	20098	150219	0.326367	2.43937	7.47431	0.528849	0.0432571	0.000129901	0.821246	0.228284	0.00195787	0.00370264	0.0325207	Au+	9.3e-92	2CAQ8@1|root,2S36W@2759|Eukaryota,3A56M@33154|Opisthokonta,3P2SA@4751|Fungi,3QUU5@4890|Ascomycota,20GZ0@147545|Eurotiomycetes,3S3XF@5042|Eurotiales	4751|Fungi	S	Get5 carboxyl domain	-	-
qsublack_gene_31028	78232.4	37574.4	179118	0.480291	2.28956	4.76702	0.123005	0.0146896	0.000324753	0.458299	0.182685	0.00350857	0.00145854	0.021757	Au+	9.19e-101	COG0022@1|root,KOG0525@2759|Eukaryota,38BVR@33154|Opisthokonta,3NV7X@4751|Fungi,3QM8Z@4890|Ascomycota,20CPI@147545|Eurotiomycetes,3S3E2@5042|Eurotiales	4751|Fungi	C	dehydrogenase	1.2.4.4	K00167
qsublack_gene_31287	35530.3	11043.2	86292	0.31081	2.42868	7.81404	0.684211	0.0524259	0.000487129	0.894493	0.245851	0.00477035	0.00760682	0.0482842	Au+	4.53e-79	COG0400@1|root,KOG2112@2759|Eukaryota,38RN5@33154|Opisthokonta,3NZH9@4751|Fungi,3QNTK@4890|Ascomycota,20B2A@147545|Eurotiomycetes,3S7EB@5042|Eurotiales	4751|Fungi	I	Phospholipase	3.1.1.5	K06128,K06130,K06999
qsublack_gene_31518	80089.6	29172.8	225047	0.364252	2.80995	7.71429	0.352681	0.0089307	0.000725281	0.716613	0.177283	0.00633972	0.00257326	0.0270433	Au+	0	COG5657@1|root,KOG2274@2759|Eukaryota,38BE2@33154|Opisthokonta,3NYWN@4751|Fungi,3QM71@4890|Ascomycota,20F5U@147545|Eurotiomycetes,3S62P@5042|Eurotiales	4751|Fungi	UY	Importin beta-5 subunit	-	K20224
qsublack_gene_31637	17564.1	7196.34	39334.8	0.409718	2.23949	5.46594	0.14314	0.0432571	0.00208924	0.497156	0.228284	0.0138998	0.00617194	0.0426102	Au+	1e-72	COG0183@1|root,KOG1390@2759|Eukaryota,38C4X@33154|Opisthokonta,3NV1W@4751|Fungi,3QPGT@4890|Ascomycota,20AR8@147545|Eurotiomycetes,3S3DU@5042|Eurotiales	4751|Fungi	I	Belongs to the thiolase family	2.3.1.9	K00626
qsublack_gene_32045	51456.1	24228.4	157826	0.470855	3.06719	6.51408	0.528849	0.00287947	0.000205677	0.821246	0.177283	0.00258863	0.00104015	0.0194388	Au+	9.25e-22	COG0516@1|root,KOG2550@2759|Eukaryota,38FT7@33154|Opisthokonta,3NVXY@4751|Fungi,3QJYJ@4890|Ascomycota,20DHG@147545|Eurotiomycetes,3S3ZX@5042|Eurotiales	4751|Fungi	F	Catalyzes the conversion of inosine 5'-phosphate (IMP) to xanthosine 5'-phosphate (XMP), the first committed and rate- limiting step in the de novo synthesis of guanine nucleotides, and therefore plays an important role in the regulation of cell growth	1.1.1.205	K00088
qsublack_gene_32371	24198.6	6332.09	63169.4	0.261672	2.61046	9.97607	0.0892096	0.105122	0.000324753	0.396036	0.338025	0.00350857	0.0033223	0.0306112	Au+	1.8e-111	COG5057@1|root,KOG2867@2759|Eukaryota,38E5Z@33154|Opisthokonta,3NW6C@4751|Fungi,3QMWP@4890|Ascomycota,20AGM@147545|Eurotiomycetes,3S4PZ@5042|Eurotiales	4751|Fungi	O	PPIases accelerate the folding of proteins. It catalyzes the cis-trans isomerization of proline imidic peptide bonds in oligopeptides	-	K17605
qsublack_gene_32530	68582.5	22488.4	220442	0.327904	3.21426	9.80246	0.853428	0.00287947	1.08251e-05	0.959386	0.177283	0.000574593	0.000501098	0.0172216	Au+	2.79e-36	COG0119@1|root,KOG2368@2759|Eukaryota,38D16@33154|Opisthokonta,3NVNW@4751|Fungi,3QM5R@4890|Ascomycota,20BJ8@147545|Eurotiomycetes,3S52P@5042|Eurotiales	4751|Fungi	CE	Hydroxymethylglutaryl-CoA lyase	4.1.3.4	K01640
qsublack_gene_32531	45595.6	16011.3	140114	0.351158	3.07298	8.75098	0.853428	0.0089307	0.000205677	0.959386	0.177283	0.00258863	0.00217027	0.0251937	Au+	7.98e-164	COG0119@1|root,KOG2368@2759|Eukaryota,38D16@33154|Opisthokonta,3NVNW@4751|Fungi,3QM5R@4890|Ascomycota,20BJ8@147545|Eurotiomycetes,3S52P@5042|Eurotiales	4751|Fungi	CE	Hydroxymethylglutaryl-CoA lyase	4.1.3.4	K01640
qsublack_gene_32715	37677.3	17863.3	80031	0.474114	2.12412	4.48019	0.035463	0.075256	0.000129901	0.255676	0.283857	0.00195787	0.00122537	0.0202693	Au+	0	COG0804@1|root,2QPKB@2759|Eukaryota,39RES@33154|Opisthokonta,3NU8N@4751|Fungi,3QRZY@4890|Ascomycota,20F08@147545|Eurotiomycetes,3S54B@5042|Eurotiales	4751|Fungi	F	belongs to the metallo- dependent hydrolases superfamily. Urease alpha subunit family	3.5.1.5	K01427
qsublack_gene_32998	71174.3	35978	157164	0.505492	2.20816	4.36833	0.14314	0.00684146	2.16502e-05	0.497156	0.177283	0.000724144	0.000422622	0.0172216	Au+	1.64e-44	KOG0211@1|root,KOG0211@2759|Eukaryota,38DRM@33154|Opisthokonta,3NU14@4751|Fungi,3QKFE@4890|Ascomycota,20BHS@147545|Eurotiomycetes,3B2N2@33183|Onygenales,3FV6E@34384|Arthrodermataceae	4751|Fungi	T	HEAT repeats	-	K03456
qsublack_gene_33664	33984.9	13746.7	91986	0.404493	2.70667	6.69151	0.853428	0.0288056	0.000324753	0.959386	0.203276	0.00350857	0.00499482	0.037914	Au+	5.52e-35	COG1012@1|root,KOG2450@2759|Eukaryota,38CDB@33154|Opisthokonta,3NW4N@4751|Fungi,3QNF2@4890|Ascomycota,20W0A@147548|Leotiomycetes	4751|Fungi	C	Belongs to the aldehyde dehydrogenase family	1.2.1.3,1.2.1.5	K00128,K00129
qsublack_gene_33839	22716.7	6978.25	70808.8	0.307186	3.11704	10.1471	0.035463	0.123005	0.00105003	0.255676	0.367761	0.00838767	0.00376042	0.0325207	Au+	1.49e-82	COG0473@1|root,KOG0786@2759|Eukaryota,39UE3@33154|Opisthokonta,3P0CQ@4751|Fungi,3QMYA@4890|Ascomycota,20EH3@147545|Eurotiomycetes,3S3SE@5042|Eurotiales	4751|Fungi	E	Catalyzes the oxidation of 3-carboxy-2-hydroxy-4- methylpentanoate (3-isopropylmalate) to 3-carboxy-4-methyl-2- oxopentanoate. The product decarboxylates to 4-methyl-2 oxopentanoate	1.1.1.85	K00052
qsublack_gene_33881	52428.6	16918.9	132009	0.322704	2.51787	7.80242	0.795936	0.0232306	0.00105003	0.941727	0.192276	0.00838767	0.00677281	0.0450598	Au+	2.43e-88	28IT5@1|root,2QR4F@2759|Eukaryota,38H7X@33154|Opisthokonta,3NX9C@4751|Fungi,3QN5K@4890|Ascomycota,20E82@147545|Eurotiomycetes,3S66D@5042|Eurotiales	4751|Fungi	S	Protein of unknown function (DUF1688)	-	-
qsublack_gene_33971	152599	88585	327779	0.58051	2.14798	3.70016	0.075256	0.00684146	0.000129901	0.366523	0.177283	0.00195787	0.000568643	0.0172216	Au+	7.83e-63	COG1584@1|root,2QUJS@2759|Eukaryota,39ZTU@33154|Opisthokonta,3NXGJ@4751|Fungi,3QJWZ@4890|Ascomycota,20C87@147545|Eurotiomycetes,3S5IY@5042|Eurotiales	4751|Fungi	S	GPR FUN34 family protein	-	K07034
qsublack_gene_34142	37404.9	30175.3	105557	0.806722	2.822	3.4981	0.853428	0.00105003	0.000205677	0.959386	0.177283	0.00258863	0.000754332	0.0178661	Au+	1.69e-109	COG2376@1|root,KOG2426@2759|Eukaryota,38CK2@33154|Opisthokonta,3NUS7@4751|Fungi,3QN88@4890|Ascomycota,20CGF@147545|Eurotiomycetes,3S5D5@5042|Eurotiales	4751|Fungi	G	Dihydroxyacetone kinase	2.7.1.28,2.7.1.29,4.6.1.15	K00863
qsublack_gene_34593	19696.4	7308.6	57816.4	0.371062	2.93538	7.91074	0.075256	0.0146896	0.00150469	0.366523	0.182685	0.0106594	0.00240938	0.0262629	Au+	6.72e-91	COG0673@1|root,KOG2741@2759|Eukaryota,38I4R@33154|Opisthokonta,3NVRV@4751|Fungi,3QPZ2@4890|Ascomycota,20ASG@147545|Eurotiomycetes,3S3A0@5042|Eurotiales	4751|Fungi	GQ	Dimeric dihydrodiol dehydrogenase	-	-
qsublack_gene_35029	47409.3	16488.8	76790	0.347797	1.61972	4.6571	0.035463	0.247451	0.000487129	0.255676	0.528602	0.00477035	0.00373142	0.0325207	Au+	3e-135	COG0057@1|root,KOG0657@2759|Eukaryota,38DPH@33154|Opisthokonta,3NUCI@4751|Fungi,3QNGM@4890|Ascomycota,20ABW@147545|Eurotiomycetes,3S434@5042|Eurotiales	4751|Fungi	G	Glyceraldehyde-3-phosphate dehydrogenase	1.2.1.12	K00134
qsublack_gene_35257	7678.75	6367.34	14280.4	0.829216	1.85973	2.24276	0.795936	0.0185434	0.000324753	0.941727	0.186069	0.00350857	0.00428938	0.0348206	Au+	4.23e-285	KOG1258@1|root,KOG1258@2759|Eukaryota,38HNQ@33154|Opisthokonta,3NVY7@4751|Fungi,3QMAY@4890|Ascomycota,20DW8@147545|Eurotiomycetes,3S6YZ@5042|Eurotiales	4751|Fungi	A	mRNA splicing protein (Prp39)	-	K13217
qsublack_gene_35459	250922	133633	661620	0.532567	2.63676	4.95104	0.14314	0.000725281	4.33004e-05	0.497156	0.177283	0.00102315	0.000199182	0.0172216	Au+	1.87e-131	COG1048@1|root,KOG0453@2759|Eukaryota,38CNX@33154|Opisthokonta,3NV17@4751|Fungi,3QM32@4890|Ascomycota,20C55@147545|Eurotiomycetes,3S2XP@5042|Eurotiales	4751|Fungi	CE	Belongs to the aconitase IPM isomerase family	4.2.1.3	K01681
qsublack_gene_35590	16263.9	6010.94	36506.4	0.369589	2.24463	6.07332	0.00519604	0.0892096	0.000725281	0.121601	0.310875	0.00633972	0.00115923	0.0201695	Au+	1.67e-81	COG1232@1|root,2QQ27@2759|Eukaryota,38NWR@33154|Opisthokonta,3NUM6@4751|Fungi,3QJTI@4890|Ascomycota,20BUT@147545|Eurotiomycetes,3S7WV@5042|Eurotiales	4751|Fungi	H	Flavin containing amine oxidoreductase	-	-
qsublack_gene_35591	53448.1	15058.5	113074	0.281741	2.11559	7.50899	0.0892096	0.0232306	2.16502e-05	0.396036	0.192276	0.000724144	0.000609677	0.0172216	Au+	7.18e-82	COG1232@1|root,2QQ27@2759|Eukaryota,38NWR@33154|Opisthokonta,3NUM6@4751|Fungi,3QJTI@4890|Ascomycota,20BUT@147545|Eurotiomycetes,3S7WV@5042|Eurotiales	4751|Fungi	H	Flavin containing amine oxidoreductase	-	-
qsublack_gene_35711	77803.8	46925.2	213874	0.603122	2.74889	4.55777	0.314999	0.00150469	0.000205677	0.689797	0.177283	0.00258863	0.00064696	0.0172327	Au+	0	COG0476@1|root,KOG2012@2759|Eukaryota,38C42@33154|Opisthokonta,3NURC@4751|Fungi,3QPCX@4890|Ascomycota,20CT6@147545|Eurotiomycetes,3S4AG@5042|Eurotiales	4751|Fungi	O	Belongs to the ubiquitin-activating E1 family	6.2.1.45	K03178
qsublack_gene_35812	10430.2	6124.53	41474.5	0.587192	3.97638	6.77186	0.14314	0.00684146	0.00105003	0.497156	0.177283	0.00838767	0.00188796	0.0238436	Au+	3.25e-83	2AU4B@1|root,2RZT9@2759|Eukaryota,39UEE@33154|Opisthokonta,3P1F5@4751|Fungi,3QJMA@4890|Ascomycota,20EE7@147545|Eurotiomycetes,3S7N9@5042|Eurotiales	4751|Fungi	-	-	-	-
qsublack_gene_36909	21781.1	5832.45	47664.4	0.267776	2.18834	8.17227	0.00684146	0.165494	0.00150469	0.131532	0.426096	0.0106594	0.00238156	0.0261936	Au+	4.13e-25	COG1546@1|root,2S20M@2759|Eukaryota,3A3UF@33154|Opisthokonta,3P4XD@4751|Fungi,3QX2B@4890|Ascomycota,20HMT@147545|Eurotiomycetes,3S8U3@5042|Eurotiales	4751|Fungi	S	Competence-damaged protein	-	-
qsublack_gene_37050	23969.9	12893.2	72289	0.53789	3.01582	5.60677	0.435872	0.00287947	0.000129901	0.762178	0.177283	0.00195787	0.000809811	0.0179228	Au+	2.92e-125	2CHYE@1|root,2QUCT@2759|Eukaryota,38VB8@33154|Opisthokonta,3NZ4K@4751|Fungi,3QT35@4890|Ascomycota,20KCQ@147545|Eurotiomycetes,3S4RM@5042|Eurotiales	4751|Fungi	S	Serum paraoxonase arylesterase family protein	-	-
qsublack_gene_37537	64286.8	21512.8	144687	0.334638	2.25065	6.72563	0.481251	0.0630128	0.000487129	0.791994	0.262853	0.00477035	0.00714998	0.0466788	Au+	4.72e-20	2CKYQ@1|root,2S3WP@2759|Eukaryota,3A8KQ@33154|Opisthokonta,3Q4B4@4751|Fungi,3RMH9@4890|Ascomycota,20TY8@147545|Eurotiomycetes,3S4VY@5042|Eurotiales	4751|Fungi	S	Pyridoxamine 5'-phosphate oxidase	1.4.3.5	K00275
qsublack_gene_37878	79593.7	46909.5	175723	0.589361	2.20775	3.746	0.279861	0.0185434	7.57756e-05	0.655994	0.186069	0.00140166	0.00140135	0.0214234	Au+	1.2e-106	COG2084@1|root,KOG0409@2759|Eukaryota,38F1G@33154|Opisthokonta,3PA6K@4751|Fungi,3RJD8@4890|Ascomycota,20AF0@147545|Eurotiomycetes,3S4HK@5042|Eurotiales	4751|Fungi	I	3-hydroxyisobutyrate dehydrogenase	1.1.1.31	K00020
qsublack_gene_38161	238956	119943	480302	0.501947	2.01001	4.00442	0.528849	0.035463	0.000205677	0.821246	0.214861	0.00258863	0.00387869	0.0333467	Au+	1.42e-174	COG0136@1|root,KOG4777@2759|Eukaryota,38FPW@33154|Opisthokonta,3NU99@4751|Fungi,3QNQS@4890|Ascomycota,20FP8@147545|Eurotiomycetes,3B0HE@33183|Onygenales,3FNBT@34383|Onygenales incertae sedis	4751|Fungi	E	Aspartate-semialdehyde dehydrogenase	1.2.1.11	K00133
qsublack_gene_38201	170873	108801	260524	0.63674	1.52467	2.39449	0.0432571	0.0630128	0.00105003	0.279663	0.262853	0.00838767	0.0030393	0.0294068	Au+	5.05e-203	COG0508@1|root,KOG3251@1|root,KOG0557@2759|Eukaryota,KOG3251@2759|Eukaryota,38BJW@33154|Opisthokonta,3NVAH@4751|Fungi,3QJQR@4890|Ascomycota,20FNP@147545|Eurotiomycetes,3S86R@5042|Eurotiales	4751|Fungi	I	The pyruvate dehydrogenase complex catalyzes the overall conversion of pyruvate to acetyl-CoA and CO(2)	2.3.1.12	K00627
qsublack_gene_38355	36558.8	5859.68	40322.5	0.160281	1.10295	6.88136	0.0114962	0.481251	0.00150469	0.154231	0.736711	0.0106594	0.00455168	0.036201	Au+	3.89e-48	COG0673@1|root,KOG2741@2759|Eukaryota,38DJH@33154|Opisthokonta,3NW1N@4751|Fungi,3QR3Y@4890|Ascomycota,214K1@147550|Sordariomycetes,1F20H@1028384|Glomerellales	4751|Fungi	GQ	Oxidoreductase family, NAD-binding Rossmann fold	1.1.1.18,1.1.1.369	K00010
qsublack_gene_38740	148976	67158.1	322306	0.450799	2.16349	4.79922	0.911797	0.0232306	0.000324753	0.975879	0.192276	0.00350857	0.00449913	0.0358999	Au+	3.56e-39	COG0326@1|root,KOG0019@2759|Eukaryota,38B7K@33154|Opisthokonta,3BFAG@33208|Metazoa,3CVM1@33213|Bilateria,4807Q@7711|Chordata,49154@7742|Vertebrata,3JAF8@40674|Mammalia,35M7B@314146|Euarchontoglires,4Q1Q7@9989|Rodentia	33208|Metazoa	O	regulation of transforming growth factor beta activation	-	K04079
qsublack_gene_38762	138220	40572.5	361759	0.293536	2.61727	8.91637	0.314999	0.0185434	4.33004e-05	0.689797	0.186069	0.00102315	0.00123968	0.0202693	Au+	4.28e-146	COG5019@1|root,KOG2655@2759|Eukaryota,38F6F@33154|Opisthokonta,3NUW2@4751|Fungi,3QKAN@4890|Ascomycota,1ZZ26@147541|Dothideomycetes	4751|Fungi	DUZ	Belongs to the TRAFAC class TrmE-Era-EngA-EngB-Septin- like GTPase superfamily. Septin GTPase family	-	K16945,K16946
qsublack_gene_38963	36017.1	11088.5	113893	0.307867	3.1622	10.2713	0.247451	0.035463	0.00150469	0.622878	0.214861	0.0106594	0.00610068	0.0422777	Au+	2.07e-82	2E05U@1|root,2S7MC@2759|Eukaryota,39JZB@33154|Opisthokonta,3Q4C4@4751|Fungi,3RMI5@4890|Ascomycota,20TZ9@147545|Eurotiomycetes,3SE07@5042|Eurotiales	4751|Fungi	-	-	-	-
qsublack_gene_39598	105900	46603.2	233878	0.440066	2.20847	5.01849	0.0630128	0.00287947	1.08251e-05	0.339389	0.177283	0.000574593	0.000160986	0.0172216	Au+	0	COG0002@1|root,COG0548@1|root,KOG1213@1|root,KOG1213@2759|Eukaryota,KOG2436@2759|Eukaryota,KOG4354@2759|Eukaryota,38FTK@33154|Opisthokonta,3NW51@4751|Fungi,3QK90@4890|Ascomycota,20EPX@147545|Eurotiomycetes,3S86Y@5042|Eurotiales	4751|Fungi	E	belongs to the acetylglutamate kinase family	1.2.1.38,2.7.2.8	K12659
qsublack_gene_39620	38480.7	11945.6	104662	0.310432	2.71985	8.76153	0.578742	0.0114962	0.00150469	0.846164	0.17917	0.0106594	0.00485502	0.0375282	Au+	0	COG0133@1|root,COG0159@1|root,KOG1395@2759|Eukaryota,KOG4175@2759|Eukaryota,38GS5@33154|Opisthokonta,3NUJ5@4751|Fungi,3QJDI@4890|Ascomycota,20E3G@147545|Eurotiomycetes,3S56P@5042|Eurotiales	4751|Fungi	E	tryptophan synthase	4.2.1.20	K01694
qsublack_gene_39623	150278	73473.6	333269	0.488919	2.21769	4.5359	0.279861	0.0089307	0.000205677	0.655994	0.177283	0.00258863	0.00138517	0.0213607	Au+	2.97e-48	COG1156@1|root,KOG1351@2759|Eukaryota,38F6K@33154|Opisthokonta,3NWY5@4751|Fungi,3QK93@4890|Ascomycota,20FCD@147545|Eurotiomycetes,3S4FN@5042|Eurotiales	4751|Fungi	C	V-type ATPase, B subunit	-	K02147
qsublack_gene_39641	99803	68417.3	234255	0.685524	2.34718	3.42392	0.853428	0.0114962	0.00150469	0.959386	0.17917	0.0106594	0.00545287	0.0399024	Au+	4.45e-17	COG0221@1|root,KOG1626@2759|Eukaryota,38CDN@33154|Opisthokonta,3NUSR@4751|Fungi,3QK3F@4890|Ascomycota,20CU9@147545|Eurotiomycetes,3S2YA@5042|Eurotiales	4751|Fungi	C	inorganic	3.6.1.1	K01507
qsublack_gene_39731	30544.7	14605.4	88945.1	0.478165	2.91196	6.08987	0.630529	0.00208924	4.33004e-05	0.869797	0.177283	0.00102315	0.000555588	0.0172216	Au+	1.85e-215	COG5071@1|root,KOG1498@2759|Eukaryota,38BJ1@33154|Opisthokonta,3NV7Q@4751|Fungi,3QQ1D@4890|Ascomycota,20BH4@147545|Eurotiomycetes,3S4H7@5042|Eurotiales	4751|Fungi	O	motif in proteasome subunits, Int-6, Nip-1 and TRIP-15	-	K03035
qsublack_gene_40295	50642	18466.6	111150	0.364649	2.19481	6.01896	0.123005	0.0185434	1.08251e-05	0.458299	0.186069	0.000574593	0.00052628	0.0172216	Au+	5.44e-104	COG0330@1|root,KOG2620@2759|Eukaryota,38B65@33154|Opisthokonta,3NX7K@4751|Fungi,3QMYM@4890|Ascomycota,20DG1@147545|Eurotiomycetes,3S6M3@5042|Eurotiales	4751|Fungi	C	C-terminal region of band_7	-	-
qsublack_gene_40312	47470	15818.6	103158	0.333234	2.17312	6.52132	0.393048	0.0232306	2.16502e-05	0.732217	0.192276	0.000724144	0.0013121	0.0208484	Au+	5.85e-196	KOG2291@1|root,KOG2291@2759|Eukaryota,38DP8@33154|Opisthokonta,3NXCK@4751|Fungi,3QNGU@4890|Ascomycota,20BUH@147545|Eurotiomycetes,3S56T@5042|Eurotiales	4751|Fungi	G	Essential subunit of the N-oligosaccharyl transferase (OST) complex which catalyzes the transfer of a high mannose oligosaccharide from a lipid-linked oligosaccharide donor to an asparagine residue within an Asn-X-Ser Thr consensus motif in nascent polypeptide chains	-	K12666
qsublack_gene_40994	13970.4	7276.64	21820.7	0.52086	1.56192	2.99873	0.0288056	0.075256	0.000205677	0.230602	0.283857	0.00258863	0.00133257	0.0209916	Au+	1e-177	COG5240@1|root,KOG1078@2759|Eukaryota,38D5J@33154|Opisthokonta,3NW2T@4751|Fungi,3QJT0@4890|Ascomycota,20F9R@147545|Eurotiomycetes,3S48J@5042|Eurotiales	4751|Fungi	U	The coatomer is a cytosolic protein complex that binds to dilysine motifs and reversibly associates with Golgi non- clathrin-coated vesicles, which further mediate biosynthetic protein transport from the ER, via the Golgi up to the trans Golgi network. Coatomer complex is required for budding from Golgi membranes, and is essential for the retrograde Golgi-to-ER transport of dilysine-tagged protei…	-	K17267
qsublack_gene_41198	8143.19	5168.97	15184.1	0.63476	1.86464	2.93755	0.0232306	0.0089307	0.000324753	0.208025	0.177283	0.00350857	0.000570848	0.0172216	Au+	1.85e-57	COG2057@1|root,KOG3822@2759|Eukaryota,38C4R@33154|Opisthokonta,3NXV8@4751|Fungi,3QPTB@4890|Ascomycota,20E3Y@147545|Eurotiomycetes,3B2UK@33183|Onygenales	4751|Fungi	H	Key enzyme for ketone body catabolism. Transfers the CoA moiety from succinate to acetoacetate. Formation of the enzyme-CoA intermediate proceeds via an unstable anhydride species formed between the carboxylate groups of the enzyme and substrate	2.8.3.5	K01027
qsublack_gene_41199	35849.6	17083.1	74759.1	0.476521	2.08536	4.37621	0.14314	0.0232306	2.16502e-05	0.497156	0.192276	0.000724144	0.000775052	0.0178661	Au+	7.54e-240	COG2057@1|root,KOG3822@2759|Eukaryota,38C4R@33154|Opisthokonta,3NXV8@4751|Fungi,3QPTB@4890|Ascomycota,20E3Y@147545|Eurotiomycetes,3S51B@5042|Eurotiales	4751|Fungi	H	Key enzyme for ketone body catabolism. Transfers the CoA moiety from succinate to acetoacetate. Formation of the enzyme-CoA intermediate proceeds via an unstable anhydride species formed between the carboxylate groups of the enzyme and substrate	2.8.3.5	K01027
qsublack_gene_41457	190375	107966	427965	0.567125	2.24802	3.96388	0.352681	0.0089307	0.000129901	0.716613	0.177283	0.00195787	0.00128197	0.0206838	Au+	3.53e-116	COG0056@1|root,KOG1353@2759|Eukaryota,38ERH@33154|Opisthokonta,3NUHW@4751|Fungi,3QKF2@4890|Ascomycota,21306@147550|Sordariomycetes,3U8RP@5139|Sordariales,3HC3D@35718|Chaetomiaceae	4751|Fungi	C	Produces ATP from ADP in the presence of a proton gradient across the membrane	-	K02132
qsublack_gene_41532	123594	45537.4	226783	0.368444	1.83491	4.98015	0.00388621	0.0185434	2.16502e-05	0.114323	0.186069	0.000724144	0.000133172	0.0172216	Au+	1.73e-170	COG0329@1|root,2QWNS@2759|Eukaryota,399HY@33154|Opisthokonta,3NZE9@4751|Fungi,3RJX4@4890|Ascomycota,20TDS@147545|Eurotiomycetes,3S2ZF@5042|Eurotiales	4751|Fungi	H	Belongs to the DapA family	4.1.3.16	K18123
qsublack_gene_42040	153903	51074.9	384008	0.331865	2.49514	7.51854	0.0288056	0.0089307	1.08251e-05	0.230602	0.177283	0.000574593	0.000185058	0.0172216	Au+	1.85e-242	COG0045@1|root,KOG1254@2759|Eukaryota,38CW6@33154|Opisthokonta,3NU5J@4751|Fungi,3QNY6@4890|Ascomycota,20AZ3@147545|Eurotiomycetes,3B0FJ@33183|Onygenales,3FKQB@34383|Onygenales incertae sedis	4751|Fungi	C	ATP-citrate synthase subunit 1	2.3.3.8	K01648
qsublack_gene_43111	60531.9	25155.4	137621	0.415572	2.27353	5.47085	0.14314	0.075256	0.000725281	0.497156	0.283857	0.00633972	0.00498837	0.0379044	Au+	1.36e-104	COG1960@1|root,COG5274@1|root,KOG0137@2759|Eukaryota,KOG0537@2759|Eukaryota,38F88@33154|Opisthokonta,3NVFK@4751|Fungi,3QNET@4890|Ascomycota,20CUW@147545|Eurotiomycetes,3S6UX@5042|Eurotiales	4751|Fungi	I	acyl-CoA dehydrogenase	-	-
qsublack_gene_43408	8655.28	9492.25	20110.1	1.0967	2.32344	2.11858	0.314999	0.00684146	0.0089307	0.689797	0.177283	0.0414034	0.00760682	0.0482842	Au+	1.12e-89	COG0388@1|root,KOG0805@2759|Eukaryota,39RP6@33154|Opisthokonta,3NWGQ@4751|Fungi,3QRUY@4890|Ascomycota,20EV0@147545|Eurotiomycetes,3S72Y@5042|Eurotiales	4751|Fungi	E	Carbon-nitrogen hydrolase	3.5.5.1	K01501
qsublack_gene_43739	142443	75160.2	268752	0.527652	1.88674	3.57573	0.123005	0.0432571	4.33004e-05	0.458299	0.228284	0.00102315	0.00120188	0.0202693	Au+	1.96e-120	COG0012@1|root,KOG1491@2759|Eukaryota,38BC0@33154|Opisthokonta,3NW69@4751|Fungi,3QMS2@4890|Ascomycota,20FAN@147545|Eurotiomycetes,3S4Q8@5042|Eurotiales	4751|Fungi	J	Hydrolyzes ATP, and can also hydrolyze GTP with lower efficiency. Has lower affinity for GTP	-	K06942,K19788
qsublack_gene_43991	64676.7	36339.8	113809	0.561868	1.75967	3.13181	0.0892096	0.035463	7.57756e-05	0.396036	0.214861	0.00140166	0.00110661	0.0199913	Au+	5.6e-70	COG0673@1|root,KOG2741@2759|Eukaryota,38I4R@33154|Opisthokonta,3NVRV@4751|Fungi,3QPZ2@4890|Ascomycota,20ASG@147545|Eurotiomycetes,3S3A0@5042|Eurotiales	4751|Fungi	GQ	Dimeric dihydrodiol dehydrogenase	-	-
qsublack_gene_43992	132199	85351.2	264800	0.645625	2.00304	3.10247	0.190316	0.0089307	7.57756e-05	0.555404	0.177283	0.00140166	0.000805642	0.0179228	Au+	9.1e-88	COG0563@1|root,KOG3078@2759|Eukaryota,38FS5@33154|Opisthokonta,3NV5B@4751|Fungi,3QQ0P@4890|Ascomycota,20G10@147545|Eurotiomycetes,3S70K@5042|Eurotiales	4751|Fungi	F	Catalyzes the reversible transfer of the terminal phosphate group between ATP and AMP. Plays an important role in cellular energy homeostasis and in adenine nucleotide metabolism. Adenylate kinase activity is critical for regulation of the phosphate utilization and the AMP de novo biosynthesis pathways	2.7.4.3	K00939
qsublack_gene_44403	41597.3	14824.4	133611	0.356379	3.21202	9.01294	0.481251	0.00519604	1.08251e-05	0.791994	0.177283	0.000574593	0.000536565	0.0172216	Au+	1.06e-33	COG5096@1|root,KOG1058@2759|Eukaryota,38E3K@33154|Opisthokonta,3NU7Q@4751|Fungi	4751|Fungi	U	The coatomer is a cytosolic protein complex that binds to dilysine motifs and reversibly associates with Golgi non- clathrin-coated vesicles, which further mediate biosynthetic protein transport from the ER, via the Golgi up to the trans Golgi network. Coatomer complex is required for budding from Golgi membranes, and is essential for the retrograde Golgi-to-ER transport of dilysine-tagged protei…	-	K17301
qsublack_gene_44406	112792	58385.9	251781	0.517642	2.23226	4.31236	0.435872	0.0232306	7.57756e-05	0.762178	0.192276	0.00140166	0.00197263	0.024408	Au+	4.33e-20	KOG3392@1|root,KOG3392@2759|Eukaryota,396QN@33154|Opisthokonta,3P00Z@4751|Fungi,3QQV2@4890|Ascomycota,20C6S@147545|Eurotiomycetes,3S63C@5042|Eurotiales	4751|Fungi	A	Mago nashi domain protein	-	K12877
qsublack_gene_44454	253544	133533	521729	0.526667	2.05775	3.90711	0.279861	0.035463	0.00150469	0.655994	0.214861	0.0106594	0.00644874	0.0437699	Au+	1.35e-47	COG0712@1|root,KOG1662@2759|Eukaryota,39SAW@33154|Opisthokonta,3NXBK@4751|Fungi,3QP98@4890|Ascomycota,20C8W@147545|Eurotiomycetes,3S5UZ@5042|Eurotiales	4751|Fungi	C	ATP synthase oligomycin sensitivity conferral protein	-	K02137
qsublack_gene_44610	22206	8572.54	57191.6	0.386046	2.5755	6.67149	0.14314	0.0288056	0.00150469	0.497156	0.203276	0.0106594	0.00431158	0.0348206	Au+	4.71e-196	COG0571@1|root,KOG3769@2759|Eukaryota,38FEN@33154|Opisthokonta,3NW2P@4751|Fungi,3QPRS@4890|Ascomycota,20CG3@147545|Eurotiomycetes,3S50W@5042|Eurotiales	4751|Fungi	J	60S ribosomal protein L3	-	K17425
qsublack_gene_44625	258423	166037	423041	0.642501	1.63701	2.54787	0.14314	0.0630128	0.000129901	0.497156	0.262853	0.00195787	0.00229113	0.025899	Au+	1.1e-167	COG0473@1|root,KOG0785@2759|Eukaryota,38CQA@33154|Opisthokonta,3NVMJ@4751|Fungi,3QMCG@4890|Ascomycota,20BVP@147545|Eurotiomycetes,3S6KK@5042|Eurotiales	4751|Fungi	C	Isocitrate dehydrogenase NAD subunit, mitochondrial	1.1.1.41	K00030
qsublack_gene_44700	135182	81961.1	329557	0.6063	2.43787	4.02089	0.075256	0.000725281	4.33004e-05	0.366523	0.177283	0.00102315	0.000153877	0.0172216	Au+	0	COG0542@1|root,KOG1051@2759|Eukaryota,38CTT@33154|Opisthokonta,3NXN8@4751|Fungi,3QPJ9@4890|Ascomycota,20B7B@147545|Eurotiomycetes,3S6YS@5042|Eurotiales	4751|Fungi	O	Belongs to the ClpA ClpB family	-	K03695
qsublack_gene_44716	38008.6	19448.8	98958.3	0.511696	2.60358	5.08814	0.739364	0.0288056	0.000487129	0.920279	0.203276	0.00477035	0.00550235	0.0399056	Au+	2.68e-142	COG2301@1|root,2QQPK@2759|Eukaryota,38GJH@33154|Opisthokonta,3NXCF@4751|Fungi,3QKQ3@4890|Ascomycota,20BWB@147545|Eurotiomycetes,3S41H@5042|Eurotiales	4751|Fungi	F	Citrate lyase beta subunit	-	K11390
qsublack_gene_44899	15236.4	7457.96	44118.4	0.489483	2.89559	5.91562	0.578742	0.0185434	0.000725281	0.846164	0.186069	0.00633972	0.00455168	0.036201	Au+	2.75e-247	KOG1497@1|root,KOG1497@2759|Eukaryota,38DU8@33154|Opisthokonta,3NX1A@4751|Fungi,3QPDJ@4890|Ascomycota,20DER@147545|Eurotiomycetes,3S7CS@5042|Eurotiales	4751|Fungi	OT	COP9 signalosome	-	K12178
qsublack_gene_45966	13198.5	7542.37	31384	0.571456	2.37785	4.16103	0.0432571	0.00519604	1.08251e-05	0.279663	0.177283	0.000574593	0.000175296	0.0172216	Au+	7.37e-199	COG1741@1|root,2QQ5A@2759|Eukaryota,38DR2@33154|Opisthokonta,3NW75@4751|Fungi,3QPGR@4890|Ascomycota,20B9G@147545|Eurotiomycetes,3S40Y@5042|Eurotiales	4751|Fungi	S	Belongs to the pirin family	-	K06911
qsublack_gene_46462	35214.9	13704.3	75710.6	0.389163	2.14996	5.52458	0.0524259	0.0524259	0.00105003	0.309444	0.245851	0.00838767	0.00305108	0.0294068	Au+	6.11e-149	COG0473@1|root,KOG0785@2759|Eukaryota,38RHP@33154|Opisthokonta,3NWJP@4751|Fungi,3QJQU@4890|Ascomycota,20DZP@147545|Eurotiomycetes,3S3R7@5042|Eurotiales	4751|Fungi	E	Dehydrogenase	1.1.1.87	K05824
qsublack_gene_46475	139437	66218.8	335831	0.474901	2.40848	5.07154	0.0524259	0.00519604	1.08251e-05	0.309444	0.177283	0.000574593	0.000191125	0.0172216	Au+	4.72e-185	COG0469@1|root,KOG2323@2759|Eukaryota,38BPM@33154|Opisthokonta,3NUBE@4751|Fungi,3QP88@4890|Ascomycota,20D7Y@147545|Eurotiomycetes,3S4RK@5042|Eurotiales	4751|Fungi	G	Belongs to the pyruvate kinase family	2.7.1.40	K00873
qsublack_gene_46584	13378.6	7338.55	61602.4	0.548531	4.60456	8.39436	0.352681	0.0089307	0.00287947	0.716613	0.177283	0.0177096	0.0049563	0.0378176	Au+	1.05e-163	COG0079@1|root,KOG0633@2759|Eukaryota,38DTP@33154|Opisthokonta,3NV21@4751|Fungi,3QJCD@4890|Ascomycota,20DUG@147545|Eurotiomycetes,3S4CR@5042|Eurotiales	4751|Fungi	E	Histidinol-phosphate aminotransferase	2.6.1.9	K00817
qsublack_gene_46663	71577.8	27726	153586	0.387354	2.14572	5.53944	0.0630128	0.035463	2.16502e-05	0.339389	0.214861	0.000724144	0.000633741	0.0172216	Au+	9.89e-140	COG0072@1|root,KOG2472@2759|Eukaryota,38BAE@33154|Opisthokonta,3NVJA@4751|Fungi,3QK0D@4890|Ascomycota,20DYY@147545|Eurotiomycetes,3S4BJ@5042|Eurotiales	4751|Fungi	J	Phenylalanyl-tRNA synthetase, beta subunit	6.1.1.20	K01890
qsublack_gene_46665	58999.8	25526.5	122098	0.432654	2.06946	4.78319	0.105122	0.0524259	0.000725281	0.428982	0.245851	0.00633972	0.00356665	0.0316675	Au+	5.39e-12	KOG0211@1|root,KOG0211@2759|Eukaryota,38DRM@33154|Opisthokonta,3B9UG@33208|Metazoa	33208|Metazoa	T	meiotic spindle elongation	-	K03456
qsublack_gene_47321	128087	58918.7	293331	0.459989	2.29009	4.97856	0.0232306	0.000487129	1.08251e-05	0.208025	0.177283	0.000574593	5.44589e-05	0.0172216	Au+	0	COG1038@1|root,KOG0369@2759|Eukaryota,39RBB@33154|Opisthokonta,3NW8J@4751|Fungi,3QPPS@4890|Ascomycota,20E8Z@147545|Eurotiomycetes,3S4SC@5042|Eurotiales	4751|Fungi	C	Catalyzes a 2-step reaction, involving the ATP-dependent carboxylation of the covalently attached biotin in the first step and the transfer of the carboxyl group to pyruvate in the second	6.4.1.1	K01958
qsublack_gene_47645	12174.5	5631.14	26720.6	0.462536	2.1948	4.74514	0.123005	0.0146896	4.33004e-05	0.458299	0.182685	0.00102315	0.000690075	0.0176126	Au+	2.88e-65	2D7VU@1|root,2S59W@2759|Eukaryota,38GYC@33154|Opisthokonta,3NTWP@4751|Fungi,3QMDY@4890|Ascomycota,20C4G@147545|Eurotiomycetes,3S48S@5042|Eurotiales	4751|Fungi	-	-	-	-
qsublack_gene_47740	18047.3	6869.85	53178.8	0.380658	2.94663	7.74089	0.247451	0.0232306	0.000129901	0.622878	0.192276	0.00195787	0.00177687	0.0232006	Au+	1.09e-30	COG1028@1|root,KOG1200@2759|Eukaryota,39JCS@33154|Opisthokonta,3Q3PJ@4751|Fungi,3RM7M@4890|Ascomycota,20D2F@147545|Eurotiomycetes,3SBCK@5042|Eurotiales	4751|Fungi	Q	Enoyl-(Acyl carrier protein) reductase	1.1.1.127	K00065
qsublack_gene_47927	50145.4	6416.24	158299	0.127953	3.15679	24.6716	0.105122	0.00388621	1.08251e-05	0.428982	0.177283	0.000574593	0.000231044	0.0172216	Au+	5.42e-91	COG0045@1|root,KOG1254@2759|Eukaryota,38CW6@33154|Opisthokonta,3NU5J@4751|Fungi,3QNY6@4890|Ascomycota,20AZ3@147545|Eurotiomycetes,3S5JX@5042|Eurotiales	4751|Fungi	C	ATP citrate lyase, subunit 1	2.3.3.8	K01648
qsublack_gene_48426	34312.2	23392.5	62000.6	0.681755	1.80696	2.65045	0.14314	0.0114962	0.00208924	0.497156	0.17917	0.0138998	0.00334812	0.030618	Au+	8.18e-64	COG1012@1|root,KOG2451@2759|Eukaryota,3AIFC@33154|Opisthokonta,3P05T@4751|Fungi,3RKT3@4890|Ascomycota,20DGD@147545|Eurotiomycetes,3S31K@5042|Eurotiales	4751|Fungi	C	Dehydrogenase	-	-
qsublack_gene_48446	34480.6	8347.97	101881	0.242106	2.95474	12.2043	0.0524259	0.0146896	0.00150469	0.309444	0.182685	0.0106594	0.00207444	0.0249103	Au+	2.47e-123	COG0620@1|root,KOG2263@2759|Eukaryota,38GZS@33154|Opisthokonta,3NW49@4751|Fungi,3QN7P@4890|Ascomycota,20D5V@147545|Eurotiomycetes,3S789@5042|Eurotiales	4751|Fungi	E	5-methyltetrahydropteroyltriglutamate--homocysteine	2.1.1.14	K00549
qsublack_gene_48709	131072	67168.3	211724	0.512453	1.61532	3.15214	0.0089307	0.035463	0.000487129	0.140682	0.214861	0.00477035	0.000824573	0.0179228	Au+	3.48e-44	COG0443@1|root,KOG0101@2759|Eukaryota,38D3W@33154|Opisthokonta,3NUH7@4751|Fungi,3QN82@4890|Ascomycota,20DVE@147545|Eurotiomycetes,3S53Y@5042|Eurotiales	4751|Fungi	O	Belongs to the heat shock protein 70 family	-	K03283
qsublack_gene_48712	70991.1	22593.5	168047	0.318258	2.36715	7.43785	0.0185434	0.00287947	1.08251e-05	0.188391	0.177283	0.000574593	9.5094e-05	0.0172216	Au+	1.11e-19	COG0443@1|root,KOG0101@2759|Eukaryota,38BSZ@33154|Opisthokonta,3NVJE@4751|Fungi,3QJZ7@4890|Ascomycota,3RRJK@4891|Saccharomycetes	4751|Fungi	O	Belongs to the heat shock protein 70 family	-	K03283
qsublack_gene_48917	44421.9	14234.8	156258	0.320445	3.51759	10.9772	0.684211	0.00519604	0.00287947	0.894493	0.177283	0.0177096	0.00468879	0.0366546	Au+	2.02e-239	COG0045@1|root,KOG1254@2759|Eukaryota,38CW6@33154|Opisthokonta,3NU5J@4751|Fungi,3QNY6@4890|Ascomycota,20AZ3@147545|Eurotiomycetes,3B0FJ@33183|Onygenales,3FKQB@34383|Onygenales incertae sedis	4751|Fungi	C	ATP-citrate synthase subunit 1	2.3.3.8	K01648
qsublack_gene_48994	48891.1	25304.3	167929	0.517565	3.43476	6.63639	0.911797	0.00287947	0.000487129	0.975879	0.177283	0.00477035	0.0017028	0.0228025	Au+	1.36e-105	KOG0292@1|root,KOG0292@2759|Eukaryota,38DFX@33154|Opisthokonta,3NW3Q@4751|Fungi,3QN2T@4890|Ascomycota,20AXI@147545|Eurotiomycetes,3B1HG@33183|Onygenales,3FJM6@34383|Onygenales incertae sedis	4751|Fungi	U	Coatomer subunit alpha	-	K05236
qsublack_gene_49146	37668.2	16562.4	84536.7	0.439692	2.24425	5.10413	0.123005	0.0288056	7.57756e-05	0.458299	0.203276	0.00140166	0.00116975	0.0202085	Au+	1.04e-41	COG3836@1|root,2QR7H@2759|Eukaryota,39SIK@33154|Opisthokonta,3P00T@4751|Fungi,3QN43@4890|Ascomycota,20GIM@147545|Eurotiomycetes,3S3RX@5042|Eurotiales	4751|Fungi	E	HpcH/HpaI aldolase/citrate lyase family	4.1.2.52	K02510
qsublack_gene_49759	233699	126797	335591	0.542565	1.436	2.64668	0.0524259	0.105122	0.000205677	0.309444	0.338025	0.00258863	0.00211498	0.0249314	Au+	1.74e-150	COG0638@1|root,KOG0179@2759|Eukaryota,38EK6@33154|Opisthokonta,3NZ3T@4751|Fungi,3QP2N@4890|Ascomycota,20CEI@147545|Eurotiomycetes,3S3E8@5042|Eurotiales	4751|Fungi	O	Proteasome	3.4.25.1	K02732
qsublack_gene_49779	51236.5	24501.8	103535	0.478211	2.02073	4.22561	0.0524259	0.0114962	1.08251e-05	0.309444	0.17917	0.000574593	0.000273946	0.0172216	Au+	8.14e-306	COG0449@1|root,KOG1268@2759|Eukaryota,38DW1@33154|Opisthokonta,3NUR2@4751|Fungi,3QJJE@4890|Ascomycota,20C08@147545|Eurotiomycetes,3S6EZ@5042|Eurotiales	4751|Fungi	M	Glucosamine-fructose-6-phosphate aminotransferase	2.6.1.16	K00820
qsublack_gene_50225	67328.8	19713.5	221665	0.292795	3.29227	11.2443	0.217563	0.00684146	0.00388621	0.588496	0.177283	0.0222394	0.00436194	0.0350727	Au+	4.21e-61	COG0115@1|root,KOG0975@2759|Eukaryota,38GTA@33154|Opisthokonta,3NVAG@4751|Fungi,3QNX1@4890|Ascomycota,20BY4@147545|Eurotiomycetes,3S5UQ@5042|Eurotiales	4751|Fungi	E	Belongs to the class-IV pyridoxal-phosphate-dependent aminotransferase family	2.6.1.42	K00826
qsublack_gene_50624	36881.9	30681.7	81579.2	0.831889	2.2119	2.65889	0.853428	0.0114962	0.00105003	0.959386	0.17917	0.00838767	0.00468879	0.0366546	Au+	5.23e-45	KOG3457@1|root,KOG3457@2759|Eukaryota,3A8H3@33154|Opisthokonta,3P6QV@4751|Fungi,3QWNG@4890|Ascomycota,20HEV@147545|Eurotiomycetes,3S8ZS@5042|Eurotiales	4751|Fungi	U	Necessary for protein translocation in the endoplasmic reticulum	-	K09481
qsublack_gene_50681	23509.3	16174.9	55631.7	0.688023	2.36638	3.43939	0.393048	0.0232306	0.00150469	0.732217	0.192276	0.0106594	0.00600695	0.0419856	Au+	2.78e-24	COG1063@1|root,KOG0024@2759|Eukaryota,38I3Q@33154|Opisthokonta,3NZVH@4751|Fungi,3QQ11@4890|Ascomycota,217WX@147550|Sordariomycetes,1ETUQ@1028384|Glomerellales	4751|Fungi	Q	Alcohol dehydrogenase GroES-like domain-containing protein	1.1.1.287	K17818
qsublack_gene_50995	12162.6	7002.12	44955.9	0.575711	3.69626	6.42033	0.190316	0.00388621	0.000487129	0.555404	0.177283	0.00477035	0.00115624	0.0201695	Au+	2.28e-272	COG0474@1|root,KOG0205@2759|Eukaryota,38CYC@33154|Opisthokonta,3NUFA@4751|Fungi,3QJBC@4890|Ascomycota,20C7G@147545|Eurotiomycetes,3S7P6@5042|Eurotiales	4751|Fungi	P	Plasma membrane	3.6.3.6	K01535
qsublack_gene_51061	63136.5	42712.7	150235	0.676513	2.37953	3.51735	0.630529	0.00208924	0.000129901	0.869797	0.177283	0.00195787	0.000797369	0.0179228	Au+	2.84e-30	COG0678@1|root,KOG0541@2759|Eukaryota,3A0I3@33154|Opisthokonta,3P1V3@4751|Fungi,3QU1U@4890|Ascomycota,20GJ7@147545|Eurotiomycetes,3S6FZ@5042|Eurotiales	4751|Fungi	O	AhpC TSA family protein	1.11.1.15	K11187
qsublack_gene_51190	135976	63317.8	212904	0.465655	1.56575	3.36247	0.0630128	0.105122	0.000725281	0.339389	0.338025	0.00633972	0.00390883	0.0334488	Au+	9.94e-104	KOG0185@1|root,KOG0185@2759|Eukaryota,38G4U@33154|Opisthokonta,3NUK4@4751|Fungi,3QJEW@4890|Ascomycota,20FSG@147545|Eurotiomycetes,3S3BH@5042|Eurotiales	4751|Fungi	O	Proteasome subunit beta	3.4.25.1	K02736
qsublack_gene_51197	17376	6933.52	59494.1	0.399028	3.42392	8.58065	0.352681	0.035463	0.00150469	0.716613	0.214861	0.0106594	0.00714998	0.0466788	Au+	5.73e-129	COG1011@1|root,2S19E@2759|Eukaryota,3A0GM@33154|Opisthokonta,3P33T@4751|Fungi,3QUJY@4890|Ascomycota,20AR9@147545|Eurotiomycetes,3S557@5042|Eurotiales	4751|Fungi	S	Haloacid dehalogenase, type II	3.8.1.2	K01560
qsublack_gene_51277	35001.8	11858.4	99732.1	0.338794	2.84934	8.41025	0.035463	0.00150469	1.08251e-05	0.255676	0.177283	0.000574593	9.67025e-05	0.0172216	Au+	0	COG1525@1|root,KOG2039@2759|Eukaryota,38HTP@33154|Opisthokonta,3NVE3@4751|Fungi,3QP50@4890|Ascomycota,20CKK@147545|Eurotiomycetes,3S84N@5042|Eurotiales	4751|Fungi	K	Transcription factor (Snd1 p100)	-	K15979
qsublack_gene_51307	36226.2	9308.1	88610.6	0.256944	2.44603	9.51973	0.247451	0.035463	0.000205677	0.622878	0.214861	0.00258863	0.0026542	0.0275773	Au+	1.54e-118	COG0436@1|root,KOG0257@2759|Eukaryota,39V27@33154|Opisthokonta,3NYY7@4751|Fungi,3QQY1@4890|Ascomycota,20BXV@147545|Eurotiomycetes,3S4MC@5042|Eurotiales	4751|Fungi	E	Aminotransferase	-	-
qsublack_gene_51493	43149.1	20140.8	92936.2	0.466772	2.15384	4.61432	0.393048	0.035463	0.000324753	0.732217	0.214861	0.00350857	0.00395449	0.0334488	Au+	3.75e-126	KOG0758@1|root,KOG0758@2759|Eukaryota,38BD7@33154|Opisthokonta,3NTYD@4751|Fungi,3QKIE@4890|Ascomycota,20F00@147545|Eurotiomycetes,3S6S0@5042|Eurotiales	4751|Fungi	C	Belongs to the mitochondrial carrier (TC 2.A.29) family	-	K15109
qsublack_gene_51571	27953.3	11707.4	77853.3	0.418819	2.78512	6.64994	0.190316	0.035463	0.00208924	0.555404	0.214861	0.0138998	0.00636606	0.0437033	Au+	7.31e-151	COG1540@1|root,2S0UZ@2759|Eukaryota,39TJK@33154|Opisthokonta,3P0ZU@4751|Fungi,3QT1B@4890|Ascomycota,20DRP@147545|Eurotiomycetes,3S6A6@5042|Eurotiales	4751|Fungi	S	lactam utilization protein lamB	-	K07160
qsublack_gene_51593	1.59497e+06	798211	4.1239e+06	0.500456	2.58557	5.16643	0.739364	0.0146896	0.00105003	0.920279	0.182685	0.00838767	0.00512539	0.0385457	Au+	8.47e-25	COG0450@1|root,KOG0854@2759|Eukaryota,38CN4@33154|Opisthokonta,3NW6E@4751|Fungi,3QMF7@4890|Ascomycota,20BB3@147545|Eurotiomycetes,3S4RV@5042|Eurotiales	4751|Fungi	O	Mitochondrial peroxiredoxin PRX1	-	-
qsublack_gene_51596	103560	41442.1	253431	0.400174	2.44718	6.11529	0.970512	0.0432571	0.000487129	0.990388	0.228284	0.00477035	0.00785621	0.0494387	Au+	5.64e-104	COG3386@1|root,KOG4499@2759|Eukaryota,38GNQ@33154|Opisthokonta,3NXSG@4751|Fungi,3QMAP@4890|Ascomycota,20H5E@147545|Eurotiomycetes,3S6B9@5042|Eurotiales	4751|Fungi	PT	Calcium homeostasis protein Regucalcin	-	-
qsublack_gene_51763	49767	11264.5	72949.4	0.226344	1.46582	6.47606	0.035463	0.393048	0.00105003	0.255676	0.669242	0.00838767	0.00641554	0.0437152	Au+	1.44e-224	COG0408@1|root,KOG1518@2759|Eukaryota,38BVF@33154|Opisthokonta,3NUJX@4751|Fungi,3QJGA@4890|Ascomycota,20ADW@147545|Eurotiomycetes,3S80K@5042|Eurotiales	4751|Fungi	H	Coproporphyrinogen III oxidase	1.3.3.3	K00228
qsublack_gene_51837	265938	156591	468956	0.588826	1.7634	2.99478	0.528849	0.0524259	0.000324753	0.821246	0.245851	0.00350857	0.0057417	0.0408591	Au+	5.4e-131	COG0050@1|root,KOG0460@2759|Eukaryota,38BHM@33154|Opisthokonta,3NV4W@4751|Fungi,3QK50@4890|Ascomycota,20EW2@147545|Eurotiomycetes,3S3SX@5042|Eurotiales	4751|Fungi	J	This protein promotes the GTP-dependent binding of aminoacyl-tRNA to the A-site of ribosomes during protein biosynthesis	-	K02358
qsublack_gene_52107	21679.7	11631.8	36162.1	0.536532	1.66802	3.10889	0.165494	0.075256	0.000205677	0.527292	0.283857	0.00258863	0.00324603	0.0304445	Au+	1.72e-187	COG0318@1|root,KOG1176@2759|Eukaryota,38GCS@33154|Opisthokonta,3NVCQ@4751|Fungi,3QJXB@4890|Ascomycota,20AKY@147545|Eurotiomycetes,3SAM7@5042|Eurotiales	4751|Fungi	I	AMP-binding enzyme	6.2.1.8	K22133
qsublack_gene_52137	57636.1	17988.2	195318	0.312099	3.38882	10.8582	0.14314	0.0146896	0.00287947	0.497156	0.182685	0.0177096	0.0044072	0.0353203	Au+	2.63e-134	COG0637@1|root,2REF4@2759|Eukaryota,39TRV@33154|Opisthokonta,3P0SW@4751|Fungi,3QN5T@4890|Ascomycota,20E7H@147545|Eurotiomycetes,3S5EY@5042|Eurotiales	4751|Fungi	S	HAD superfamily hydrolase	-	-
qsublack_gene_52146	16094.7	7991.91	54169	0.496556	3.36565	6.77798	0.911797	0.00208924	4.33004e-05	0.975879	0.177283	0.00102315	0.000624003	0.0172216	Au+	2.67e-93	KOG0278@1|root,KOG0278@2759|Eukaryota,38BC1@33154|Opisthokonta,3NZ3I@4751|Fungi,3QK73@4890|Ascomycota,20AER@147545|Eurotiomycetes,3S4TU@5042|Eurotiales	4751|Fungi	I	WD repeat protein	-	K13137
qsublack_gene_52149	34311.8	13835.8	79657.6	0.403238	2.32158	5.75734	0.075256	0.00519604	1.08251e-05	0.366523	0.177283	0.000574593	0.000225448	0.0172216	Au+	0	KOG0301@1|root,KOG0301@2759|Eukaryota,38BSR@33154|Opisthokonta,3NUQN@4751|Fungi,3QJG5@4890|Ascomycota,20BU8@147545|Eurotiomycetes,3S7HT@5042|Eurotiales	4751|Fungi	I	Polyubiquitin binding protein (Doa1 Ufd3)	-	K14018
qsublack_gene_52356	25651	8099.57	75390.6	0.315761	2.93909	9.30798	0.123005	0.0146896	0.000205677	0.458299	0.182685	0.00258863	0.00121435	0.0202693	Au+	3.3e-97	2E0XJ@1|root,2S8AT@2759|Eukaryota,39TJP@33154|Opisthokonta,3P23J@4751|Fungi,3QS07@4890|Ascomycota,20BI5@147545|Eurotiomycetes,3S6M6@5042|Eurotiales	4751|Fungi	-	-	-	-
qsublack_gene_52706	621769	350468	940330	0.563662	1.51234	2.68307	0.0114962	0.105122	2.16502e-05	0.154231	0.338025	0.000724144	0.000467371	0.0172216	Au+	4.37e-120	COG0538@1|root,KOG1526@2759|Eukaryota,38CG3@33154|Opisthokonta,3NVZ4@4751|Fungi,3QKEP@4890|Ascomycota,20EC2@147545|Eurotiomycetes,3S2R1@5042|Eurotiales	4751|Fungi	C	Belongs to the isocitrate and isopropylmalate dehydrogenases family	1.1.1.42	K00031
qsublack_gene_52730	72478	21552.7	151590	0.297369	2.09153	7.03347	0.000725281	0.0232306	0.00150469	0.102167	0.192276	0.0106594	0.000504341	0.0172216	Au+	1.25e-59	COG1905@1|root,KOG3196@2759|Eukaryota,38G5A@33154|Opisthokonta,3NV79@4751|Fungi,3QJBY@4890|Ascomycota,20BFT@147545|Eurotiomycetes,3S432@5042|Eurotiales	4751|Fungi	C	24 kDa subunit	1.6.5.3,1.6.99.3	K03943
qsublack_gene_52746	7898.63	5709.38	27768.1	0.722832	3.51556	4.86359	0.105122	0.00519604	0.00150469	0.428982	0.177283	0.0106594	0.00177687	0.0232006	Au+	3.8e-64	COG5541@1|root,KOG3343@2759|Eukaryota,39TNA@33154|Opisthokonta,3P183@4751|Fungi,3QRWI@4890|Ascomycota,20FWH@147545|Eurotiomycetes,3S5I0@5042|Eurotiales	4751|Fungi	U	coatomer subunit zeta	-	K20472
qsublack_gene_53106	31799.9	19787.9	72471.3	0.622262	2.27898	3.66241	0.0892096	0.00388621	0.000205677	0.396036	0.177283	0.00258863	0.000582756	0.0172216	Au+	0	COG3119@1|root,KOG3867@2759|Eukaryota,38DVH@33154|Opisthokonta,3NUVC@4751|Fungi,3QMMG@4890|Ascomycota,20G4C@147545|Eurotiomycetes,3S6FR@5042|Eurotiales	4751|Fungi	P	Arylsulfatase	3.1.6.1	K01130
qsublack_gene_53309	71799.7	41461.3	198478	0.577458	2.76434	4.78708	0.970512	0.0114962	0.00105003	0.990388	0.17917	0.00838767	0.00493715	0.0377501	Au+	1.21e-40	COG0685@1|root,2QR1E@2759|Eukaryota,38E3T@33154|Opisthokonta,3NW1F@4751|Fungi,3QMDA@4890|Ascomycota,20CZM@147545|Eurotiomycetes,3S5AR@5042|Eurotiales	4751|Fungi	C	Belongs to the peroxidase family	1.11.1.5	K00428
qsublack_gene_53441	31187.2	11846.3	69280.1	0.379843	2.22143	5.84827	0.217563	0.0288056	0.000129901	0.588496	0.203276	0.00195787	0.00186857	0.0238436	Au+	2.19e-218	COG5215@1|root,KOG1241@2759|Eukaryota,38HCJ@33154|Opisthokonta,3NX6P@4751|Fungi,3QPX3@4890|Ascomycota,20BPR@147545|Eurotiomycetes,3S5SC@5042|Eurotiales	4751|Fungi	UY	Importin beta-1 subunit	-	K14293
qsublack_gene_53711	60413.5	29647.2	168988	0.490738	2.7972	5.69998	0.684211	0.00684146	0.000725281	0.894493	0.177283	0.00633972	0.00319616	0.0300923	Au+	1.2e-64	COG3185@1|root,KOG0638@2759|Eukaryota,38BA4@33154|Opisthokonta,3NWM8@4751|Fungi,3QN1X@4890|Ascomycota,20B4F@147545|Eurotiomycetes,3S5Y8@5042|Eurotiales	4751|Fungi	E	4-hydroxyphenylpyruvate dioxygenase	1.13.11.27	K00457
qsublack_gene_53780	51777.8	25968.7	115035	0.501541	2.22171	4.42977	0.435872	0.035463	0.000725281	0.762178	0.214861	0.00633972	0.0057417	0.0408591	Au+	3.84e-68	COG0639@1|root,KOG0375@2759|Eukaryota,38BQG@33154|Opisthokonta,3NTWU@4751|Fungi,3QN5F@4890|Ascomycota,20CH8@147545|Eurotiomycetes,3S338@5042|Eurotiales	4751|Fungi	T	Serine threonine-protein phosphatase	3.1.3.16	K04348
qsublack_gene_53812	102221	57298.2	234992	0.560532	2.29886	4.10122	1	0.035463	4.33004e-05	1	0.214861	0.00102315	0.00328395	0.0305272	Au+	4.62e-69	KOG3380@1|root,KOG3380@2759|Eukaryota,3A6NF@33154|Opisthokonta,3P2ID@4751|Fungi,3RJSB@4890|Ascomycota,20CAT@147545|Eurotiomycetes,3S69Y@5042|Eurotiales	4751|Fungi	Z	Functions as component of the Arp2 3 complex which is involved in regulation of actin polymerization and together with an activating nucleation-promoting factor (NPF) mediates the formation of branched actin networks	-	K05754
qsublack_gene_53925	22095.8	7620.13	57887.6	0.344868	2.61984	7.59666	0.481251	0.0146896	0.000487129	0.791994	0.182685	0.00477035	0.00317151	0.0299759	Au+	7.91e-44	COG0225@1|root,KOG1635@2759|Eukaryota,39U04@33154|Opisthokonta,3P2RD@4751|Fungi,3QSG1@4890|Ascomycota,20CJX@147545|Eurotiomycetes,3S8F3@5042|Eurotiales	4751|Fungi	O	Peptide methionine sulfoxide reductase	1.8.4.11	K07304
qsublack_gene_54569	224401	137727	454388	0.613754	2.02489	3.29919	0.247451	0.0432571	0.000205677	0.622878	0.228284	0.00258863	0.00295805	0.0290842	Au+	3.48e-100	KOG0092@1|root,KOG0092@2759|Eukaryota,38HB3@33154|Opisthokonta,3NY6F@4751|Fungi,3QPQZ@4890|Ascomycota,20E4R@147545|Eurotiomycetes,3S5M3@5042|Eurotiales	4751|Fungi	U	RAB GTPase Vps21 Ypt51	-	K07889,K07976
qsublack_gene_55059	99116.9	45667.7	238001	0.460746	2.40121	5.21158	0.352681	0.0114962	7.57756e-05	0.716613	0.17917	0.00140166	0.00121906	0.0202693	Au+	1.02e-71	COG2070@1|root,2QTWN@2759|Eukaryota,397Z1@33154|Opisthokonta,3NWW5@4751|Fungi,3QKGZ@4890|Ascomycota,20E39@147545|Eurotiomycetes,3B12Y@33183|Onygenales,3FMSS@34383|Onygenales incertae sedis	4751|Fungi	E	Dihydroorotate dehydrogenase	-	-
qsublack_gene_55286	12916.9	9964.05	35436.2	0.771399	2.7434	3.5564	0.481251	0.0114962	0.00150469	0.791994	0.17917	0.0106594	0.00545287	0.0399024	Au+	7.77e-35	2E796@1|root,2SDW5@2759|Eukaryota,3A9ET@33154|Opisthokonta,3P5GR@4751|Fungi,3QY36@4890|Ascomycota,20I0E@147545|Eurotiomycetes,3S94H@5042|Eurotiales	4751|Fungi	S	Mitochondrial F1F0 ATP synthase subunit Atp14	-	K02141
qsublack_gene_55381	32769.1	14953.8	75937.2	0.456339	2.31734	5.07811	0.0185434	0.00287947	4.33004e-05	0.188391	0.177283	0.00102315	0.000146325	0.0172216	Au+	1.58e-310	2CMXK@1|root,2QSJS@2759|Eukaryota,38I1X@33154|Opisthokonta,3NY7W@4751|Fungi,3QPJQ@4890|Ascomycota,20AUP@147545|Eurotiomycetes,3S3B7@5042|Eurotiales	4751|Fungi	S	Protein of unknown function (DUF2433)	-	-
qsublack_gene_55450	16986.7	10662.4	33559.3	0.627688	1.97562	3.14745	0.105122	0.0524259	0.00105003	0.428982	0.245851	0.00838767	0.00422348	0.0345279	Au+	3.89e-246	COG5158@1|root,KOG1301@2759|Eukaryota,38BSP@33154|Opisthokonta,3NXNB@4751|Fungi,3QK9Z@4890|Ascomycota,20ASK@147545|Eurotiomycetes,3S6WQ@5042|Eurotiales	4751|Fungi	U	Belongs to the STXBP unc-18 SEC1 family	-	K19998
qsublack_gene_55867	55322.5	19237	128859	0.347725	2.32924	6.6985	0.14314	0.0432571	0.000725281	0.497156	0.228284	0.00633972	0.00376042	0.0325207	Au+	7.96e-83	KOG2883@1|root,KOG2883@2759|Eukaryota,38GMI@33154|Opisthokonta,3NYGR@4751|Fungi,3QK8Y@4890|Ascomycota,20DZ1@147545|Eurotiomycetes,3S5BI@5042|Eurotiales	4751|Fungi	S	NIPSNAP family	-	-
qsublack_gene_55939	93798.1	41907.4	224676	0.446783	2.39531	5.36124	0.435872	0.0524259	0.000205677	0.762178	0.245851	0.00258863	0.00442429	0.0353413	Au+	5.42e-220	COG1218@1|root,KOG1528@2759|Eukaryota,38CH8@33154|Opisthokonta,3NU2N@4751|Fungi,3QKPZ@4890|Ascomycota,20FFN@147545|Eurotiomycetes,3S742@5042|Eurotiales	4751|Fungi	FP	3'(2')5'-bisphosphate nucleotidase	3.1.3.7	K01082
qsublack_gene_56026	17762.8	8717.58	25908.9	0.490777	1.4586	2.97203	0.075256	0.279861	0.000725281	0.366523	0.564889	0.00633972	0.00702198	0.0460896	Au+	2.36e-190	COG1527@1|root,KOG2957@2759|Eukaryota,38D4F@33154|Opisthokonta,3NWBT@4751|Fungi,3QMU6@4890|Ascomycota,20CJ3@147545|Eurotiomycetes,3S4F2@5042|Eurotiales	4751|Fungi	C	Vacuolar ATPase is responsible for acidifying a variety of intracellular compartments in eukaryotic cells. The active enzyme consists of a catalytic V1 domain attached to an integral membrane V0 proton pore complex. This subunit is a non-integral membrane component of the membrane pore domain and is required for proper assembly of the V0 sector. Might be involved in the regulated assembly of V1 s…	-	K02146
qsublack_gene_56050	26282.9	14367.6	57945.1	0.546651	2.20467	4.03304	0.630529	0.0146896	0.000487129	0.869797	0.182685	0.00477035	0.00353458	0.0316675	Au+	4.1e-152	KOG0547@1|root,KOG0547@2759|Eukaryota,38BB8@33154|Opisthokonta,3NUNW@4751|Fungi,3QNBG@4890|Ascomycota,20AH6@147545|Eurotiomycetes,3S83B@5042|Eurotiales	4751|Fungi	U	Mitochondrial outer membrane translocase receptor (TOM70)	-	K17768
qsublack_gene_56265	58963	26243	124335	0.445076	2.1087	4.73784	0.0892096	0.0288056	4.33004e-05	0.396036	0.203276	0.00102315	0.000824573	0.0179228	Au+	9.36e-162	KOG3151@1|root,KOG3151@2759|Eukaryota,38EJH@33154|Opisthokonta,3NXSX@4751|Fungi,3QKDM@4890|Ascomycota,20ATK@147545|Eurotiomycetes,3S47B@5042|Eurotiales	4751|Fungi	O	Proteasome regulatory particle subunit (RpnL)	-	K03031
qsublack_gene_56298	63303.7	41381.5	168782	0.653698	2.66623	4.07869	0.911797	0.00684146	2.16502e-05	0.975879	0.177283	0.000724144	0.00104824	0.0194388	Au+	7.6e-16	KOG1332@1|root,KOG1332@2759|Eukaryota,38CKM@33154|Opisthokonta,3NU25@4751|Fungi,3QKM6@4890|Ascomycota,20CPQ@147545|Eurotiomycetes,3AZYB@33183|Onygenales	4751|Fungi	U	Belongs to the WD repeat SEC13 family	-	K14004
qsublack_gene_56384	14217.5	6598.5	35570.9	0.46411	2.50191	5.39076	0.123005	0.0288056	0.00150469	0.458299	0.203276	0.0106594	0.00403178	0.0338678	Au+	4.24e-66	COG2857@1|root,KOG3052@2759|Eukaryota,38BPE@33154|Opisthokonta,3NVYB@4751|Fungi,3QJSK@4890|Ascomycota,20DJ8@147545|Eurotiomycetes,3AZ4U@33183|Onygenales,3FTED@34384|Arthrodermataceae	4751|Fungi	C	Cytochrome C1 family	-	K00413
qsublack_gene_56510	184516	85597.5	388458	0.463904	2.10528	4.53819	0.795936	0.0185434	0.000205677	0.941727	0.186069	0.00258863	0.00319616	0.0300923	Au+	1.86e-19	KOG1003@1|root,KOG1003@2759|Eukaryota,3A1H2@33154|Opisthokonta,3P2Z3@4751|Fungi,3QUB4@4890|Ascomycota,20Z6U@147548|Leotiomycetes	4751|Fungi	Z	Tropomyosin like	-	K17945
qsublack_gene_56633	142562	94301.1	273268	0.661473	1.91684	2.89783	0.217563	0.0089307	4.33004e-05	0.588496	0.177283	0.00102315	0.000709945	0.0178112	Au+	2.24e-53	COG0372@1|root,KOG2617@2759|Eukaryota,38CK5@33154|Opisthokonta,3NU5Z@4751|Fungi,3QKJD@4890|Ascomycota,20CUQ@147545|Eurotiomycetes,3S6SU@5042|Eurotiales	4751|Fungi	H	Belongs to the citrate synthase family	2.3.3.1	K01647
qsublack_gene_56744	7425.56	5972.62	14099.9	0.804332	1.89884	2.36076	0.217563	0.0185434	0.00105003	0.588496	0.186069	0.00838767	0.00354829	0.0316675	Au+	2.62e-47	COG1104@1|root,KOG1549@2759|Eukaryota,38E7D@33154|Opisthokonta,3NUA7@4751|Fungi,3QMGK@4890|Ascomycota,2165B@147550|Sordariomycetes,1EVFU@1028384|Glomerellales	4751|Fungi	E	Cysteine desulfurase	2.8.1.7	K04487
qsublack_gene_56748	12868.5	5798.58	32883.2	0.450601	2.55531	5.6709	0.0892096	0.075256	0.00208924	0.396036	0.283857	0.0138998	0.0064654	0.0437699	Au+	4.09e-191	COG2930@1|root,KOG3771@1|root,KOG1843@2759|Eukaryota,KOG3771@2759|Eukaryota,38I4I@33154|Opisthokonta,3NU0B@4751|Fungi,3QJZP@4890|Ascomycota,20D70@147545|Eurotiomycetes,3S5ES@5042|Eurotiales	4751|Fungi	U	BAR adaptor protein RVS167	-	K12562
qsublack_gene_56782	297692	110874	441227	0.372445	1.48216	3.97954	0.0146896	0.105122	0.000205677	0.169987	0.338025	0.00258863	0.0011297	0.0199913	Au+	3.06e-25	COG2303@1|root,KOG1238@2759|Eukaryota,38B8Z@33154|Opisthokonta,3NXIY@4751|Fungi,3QKFY@4890|Ascomycota,20EGJ@147545|Eurotiomycetes,3MV7H@451870|Chaetothyriomycetidae	4751|Fungi	E	alcohol oxidase	1.1.3.13	K17066
qsublack_gene_57489	80764.2	63124.2	236362	0.781586	2.92657	3.7444	0.630529	0.00208924	0.00208924	0.869797	0.177283	0.0138998	0.00260332	0.0272809	Au+	2.59e-83	COG2079@1|root,2QPZI@2759|Eukaryota,39S6I@33154|Opisthokonta,3NWTN@4751|Fungi,3QQD1@4890|Ascomycota,20BB4@147545|Eurotiomycetes,3S4UJ@5042|Eurotiales	4751|Fungi	S	2-methylcitrate dehydratase	4.2.1.79	K01720
qsublack_gene_57490	86002.7	56115	167980	0.65248	1.95319	2.99349	0.217563	0.0146896	0.000205677	0.588496	0.182685	0.00258863	0.00158001	0.0221777	Au+	2.5e-180	COG2079@1|root,2QPZI@2759|Eukaryota,39S6I@33154|Opisthokonta,3NWTN@4751|Fungi,3QQD1@4890|Ascomycota,20BB4@147545|Eurotiomycetes,3S4UJ@5042|Eurotiales	4751|Fungi	S	2-methylcitrate dehydratase	4.2.1.79	K01720
qsublack_gene_57505	83518.5	25499.1	175548	0.305311	2.1019	6.88446	0.0630128	0.0185434	1.08251e-05	0.339389	0.186069	0.000574593	0.000376286	0.0172216	Au+	2.59e-53	COG0513@1|root,KOG0329@2759|Eukaryota,38BRK@33154|Opisthokonta,3NU8C@4751|Fungi,3QP43@4890|Ascomycota,20BSN@147545|Eurotiomycetes,3S5E4@5042|Eurotiales	4751|Fungi	A	ATP-binding RNA helicase involved in transcription elongation and required for the export of mRNA out of the nucleus. SUB2 plays also a role in pre-mRNA splicing and spliceosome assembly. May be involved in rDNA and telomeric silencing, and maintenance of genome integrity (By similarity)	3.6.4.13	K12812
qsublack_gene_57767	24667	11262.7	62136	0.456591	2.519	5.51696	0.165494	0.00519604	1.08251e-05	0.527292	0.177283	0.000574593	0.000325653	0.0172216	Au+	1.94e-169	KOG0647@1|root,KOG0647@2759|Eukaryota,38DJV@33154|Opisthokonta,3NU7G@4751|Fungi,3QRX9@4890|Ascomycota,20EQT@147545|Eurotiomycetes,3S73U@5042|Eurotiales	4751|Fungi	A	Nuclear pore complex protein (SonA)	-	K14298
qsublack_gene_58105	22684.6	12622.1	60281	0.556416	2.65735	4.77584	0.970512	0.0232306	0.000205677	0.990388	0.192276	0.00258863	0.00393921	0.0334488	Au+	3.41e-218	COG0626@1|root,KOG0053@2759|Eukaryota,38NBH@33154|Opisthokonta,3NXB3@4751|Fungi,3QJBX@4890|Ascomycota,20EHT@147545|Eurotiomycetes,3S5T9@5042|Eurotiales	4751|Fungi	E	Cys/Met metabolism PLP-dependent enzyme	2.5.1.48,4.4.1.8	K01739,K01760
qsublack_gene_58819	944052	576893	1.67919e+06	0.611082	1.77871	2.91075	0.481251	0.035463	0.00105003	0.791994	0.214861	0.00838767	0.00702198	0.0460896	Au+	1.95e-172	COG1249@1|root,KOG1335@2759|Eukaryota,38CSR@33154|Opisthokonta,3NXXS@4751|Fungi,3QK5N@4890|Ascomycota,20EBZ@147545|Eurotiomycetes,3S4GN@5042|Eurotiales	4751|Fungi	C	Dihydrolipoyl dehydrogenase	1.8.1.4	K00382,K17583
qsublack_gene_59518	13667.6	5909.38	34251.1	0.432364	2.50601	5.79606	0.247451	0.0146896	0.000129901	0.622878	0.182685	0.00195787	0.00140135	0.0214234	Au+	0	COG0557@1|root,KOG2102@2759|Eukaryota,38DFE@33154|Opisthokonta,3NWBH@4751|Fungi,3QNBW@4890|Ascomycota,20BDJ@147545|Eurotiomycetes,3S6VT@5042|Eurotiales	4751|Fungi	J	Cell wall biogenesis protein phosphatase Ssd1	-	K18748
qsublack_gene_59575	13198	6318.12	41180.2	0.478719	3.12019	6.51779	0.0185434	0.0432571	0.00388621	0.188391	0.228284	0.0222394	0.00356665	0.0316675	Au+	1.58e-104	COG0656@1|root,KOG1577@2759|Eukaryota,38HH0@33154|Opisthokonta,3NU9F@4751|Fungi,3QJT4@4890|Ascomycota,20G7M@147545|Eurotiomycetes,3S57G@5042|Eurotiales	4751|Fungi	S	glycerol dehydrogenase	1.1.1.156	K18097
qsublack_gene_59645	138597	63888.9	302612	0.46097	2.1834	4.73654	0.105122	0.00684146	1.08251e-05	0.428982	0.177283	0.000574593	0.000299068	0.0172216	Au+	7.29e-60	COG5040@1|root,KOG0841@2759|Eukaryota,38CKG@33154|Opisthokonta,3NU75@4751|Fungi,3QQ0I@4890|Ascomycota,20BJP@147545|Eurotiomycetes,3S4C4@5042|Eurotiales	4751|Fungi	O	Belongs to the 14-3-3 family	-	K06630
qsublack_gene_59713	40988.7	19746.7	92810.3	0.481761	2.26429	4.70003	0.393048	0.00519604	4.33004e-05	0.732217	0.177283	0.00102315	0.000712699	0.0178112	Au+	0	COG5110@1|root,KOG2005@2759|Eukaryota,38ER5@33154|Opisthokonta,3NU6Z@4751|Fungi,3QJM5@4890|Ascomycota,20BKW@147545|Eurotiomycetes,3S3AQ@5042|Eurotiales	4751|Fungi	O	26S proteasome regulatory subunit	-	K03028
qsublack_gene_59946	28040.8	8474.91	52216.3	0.302235	1.86215	6.16128	0.00388621	0.0630128	0.000129901	0.114323	0.262853	0.00195787	0.000413986	0.0172216	Au+	6.07e-33	COG0154@1|root,KOG1212@2759|Eukaryota,38CWX@33154|Opisthokonta,3NTYP@4751|Fungi,3QKVY@4890|Ascomycota,20JZ8@147545|Eurotiomycetes	4751|Fungi	IJT	Amidase	3.5.1.4	K01426
qsublack_gene_60137	40774.1	8756.25	123485	0.21475	3.02851	14.1025	0.165494	0.0432571	0.00208924	0.527292	0.228284	0.0138998	0.00659176	0.0443957	Au+	3.28e-62	2C8A2@1|root,2S4U2@2759|Eukaryota,39JZ1@33154|Opisthokonta,3Q4BT@4751|Fungi,3RMI0@4890|Ascomycota,20TZ0@147545|Eurotiomycetes,3S61S@5042|Eurotiales	4751|Fungi	-	-	-	-
qsublack_gene_60138	22108.9	6140.09	62457.2	0.27772	2.82498	10.172	0.0524259	0.0432571	1.08251e-05	0.309444	0.228284	0.000574593	0.000524923	0.0172216	Au+	6.03e-123	2C8A2@1|root,2S4U2@2759|Eukaryota,39JZ1@33154|Opisthokonta,3Q4BT@4751|Fungi,3RMI0@4890|Ascomycota,20TZ0@147545|Eurotiomycetes,3S61S@5042|Eurotiales	4751|Fungi	-	-	-	-
qsublack_gene_60345	202482	105950	432316	0.523253	2.13508	4.08039	0.0524259	0.00388621	1.08251e-05	0.309444	0.177283	0.000574593	0.00016864	0.0172216	Au+	1.86e-210	COG2046@1|root,KOG0636@2759|Eukaryota,38EMA@33154|Opisthokonta,3NUAT@4751|Fungi,3QJXC@4890|Ascomycota,20FXD@147545|Eurotiomycetes,3B1ZJ@33183|Onygenales	4751|Fungi	P	Catalyzes the first intracellular reaction of sulfate assimilation, forming adenosine-5'-phosphosulfate (APS) from inorganic sulfate and ATP. Plays an important role in sulfate activation as a component of the biosynthesis pathway of sulfur- containing amino acids	2.7.7.4	K00958
qsublack_gene_60388	627690	314955	2.07186e+06	0.501768	3.30077	6.57828	0.795936	0.00388621	0.00150469	0.941727	0.177283	0.0106594	0.0030987	0.0297093	Au+	2.85e-52	2E2BP@1|root,2S9JP@2759|Eukaryota,39XHB@33154|Opisthokonta,3NYD5@4751|Fungi,3QNIE@4890|Ascomycota,20KPF@147545|Eurotiomycetes,3S767@5042|Eurotiales	4751|Fungi	S	Thermophilic desulfurizing enzyme family protein	-	-
qsublack_gene_60671	90040.5	35594.6	252271	0.395318	2.80175	7.08734	0.630529	0.0185434	0.000324753	0.869797	0.186069	0.00350857	0.00341797	0.0311014	Au+	1.86e-20	COG0459@1|root,KOG0359@2759|Eukaryota,38EFP@33154|Opisthokonta,3BEDS@33208|Metazoa,3CRMI@33213|Bilateria,48693@7711|Chordata,48W89@7742|Vertebrata,3J5TR@40674|Mammalia,35IY1@314146|Euarchontoglires,4PZGB@9989|Rodentia	33208|Metazoa	O	T-complex protein 1 subunit zeta	-	K09498
qsublack_gene_60705	9570.23	6573.05	18155.9	0.686823	1.89712	2.76217	0.279861	0.035463	0.000324753	0.655994	0.214861	0.00350857	0.00334812	0.030618	Au+	4.06e-256	KOG2758@1|root,KOG2758@2759|Eukaryota,38C5H@33154|Opisthokonta,3NWSQ@4751|Fungi,3QKY4@4890|Ascomycota,20D8A@147545|Eurotiomycetes,3S328@5042|Eurotiales	4751|Fungi	J	Component of the eukaryotic translation initiation factor 3 (eIF-3) complex, which is involved in protein synthesis of a specialized repertoire of mRNAs and, together with other initiation factors, stimulates binding of mRNA and methionyl-tRNAi to the 40S ribosome. The eIF-3 complex specifically targets and initiates translation of a subset of mRNAs involved in cell proliferation	-	K03250
qsublack_gene_60712	57845.9	22154.1	97910.1	0.382985	1.6926	4.4195	0.075256	0.14314	7.57756e-05	0.366523	0.394322	0.00140166	0.00211498	0.0249314	Au+	2.18e-124	COG0003@1|root,KOG2825@2759|Eukaryota,38BC4@33154|Opisthokonta,3NX42@4751|Fungi,3QKBH@4890|Ascomycota,20ATQ@147545|Eurotiomycetes,3S4GF@5042|Eurotiales	4751|Fungi	P	ATPase required for the post-translational delivery of tail-anchored (TA) proteins to the endoplasmic reticulum. Recognizes and selectively binds the transmembrane domain of TA proteins in the cytosol. This complex then targets to the endoplasmic reticulum by membrane-bound receptors, where the tail- anchored protein is released for insertion. This process is regulated by ATP binding and hydrolys…	3.6.3.16	K01551
qsublack_gene_60885	32975.1	19242.7	99455.9	0.583554	3.01609	5.16849	0.528849	0.00105003	1.08251e-05	0.821246	0.177283	0.000574593	0.000261512	0.0172216	Au+	4.52e-132	KOG2190@1|root,KOG2190@2759|Eukaryota,38G1X@33154|Opisthokonta,3NW5E@4751|Fungi,3QKRE@4890|Ascomycota,20EDC@147545|Eurotiomycetes,3AZWD@33183|Onygenales	4751|Fungi	A	KH domain RNA-binding protein	-	K18738
qsublack_gene_60944	71471.3	9271.67	50444.1	0.129726	0.705796	5.44067	2.16502e-05	0.0432571	0.0432571	0.0132156	0.228284	0.146152	0.000579756	0.0172216	Sp+	2.78e-31	COG0753@1|root,KOG0047@2759|Eukaryota,38BMC@33154|Opisthokonta,3NUEX@4751|Fungi,3QJPH@4890|Ascomycota,20CAR@147545|Eurotiomycetes,3B0XA@33183|Onygenales,3FIVQ@34383|Onygenales incertae sedis	4751|Fungi	P	Occurs in almost all aerobically respiring organisms and serves to protect cells from the toxic effects of hydrogen peroxide	1.11.1.6	K03781
qsublack_gene_61643	15370.4	10420.1	74788	0.677934	4.86573	7.17729	0.528849	0.0089307	0.00519604	0.821246	0.177283	0.0276405	0.00766594	0.0485333	Au+	8.39e-104	COG2518@1|root,KOG1661@2759|Eukaryota,38DY1@33154|Opisthokonta,3P13J@4751|Fungi,3QRMU@4890|Ascomycota,20ENG@147545|Eurotiomycetes,3AZWC@33183|Onygenales,3FMX1@34383|Onygenales incertae sedis	4751|Fungi	O	Protein-L-isoaspartate O-methyltransferase	2.1.1.77	K00573
qsublack_gene_61650	44199.8	20853.9	114787	0.47181	2.59701	5.50435	0.165494	0.0146896	0.000487129	0.527292	0.182685	0.00477035	0.0019931	0.0244676	Au+	2.9e-147	COG0513@1|root,KOG0326@2759|Eukaryota,38DGD@33154|Opisthokonta,3NV8Q@4751|Fungi,3QJP1@4890|Ascomycota,20E7K@147545|Eurotiomycetes,3S5GG@5042|Eurotiales	4751|Fungi	A	Belongs to the DEAD box helicase family	3.6.4.13	K12614
qsublack_gene_61651	68817.3	35787	174596	0.52003	2.53709	4.87874	0.352681	0.0089307	0.000487129	0.716613	0.177283	0.00477035	0.00217027	0.0251937	Au+	7.41e-132	COG0513@1|root,KOG0326@2759|Eukaryota,38DGD@33154|Opisthokonta,3NV8Q@4751|Fungi,3QJP1@4890|Ascomycota,20E7K@147545|Eurotiomycetes,3S5GG@5042|Eurotiales	4751|Fungi	A	Belongs to the DEAD box helicase family	3.6.4.13	K12614
qsublack_gene_61830	263023	128105	663542	0.487049	2.52275	5.17967	0.578742	0.0185434	0.000129901	0.846164	0.186069	0.00195787	0.00236319	0.0261936	Au+	0	KOG3717@1|root,KOG3717@2759|Eukaryota,38CAT@33154|Opisthokonta,3NUG1@4751|Fungi,3QM76@4890|Ascomycota,20AGF@147545|Eurotiomycetes,3S7IR@5042|Eurotiales	4751|Fungi	I	Belongs to the carnitine choline acetyltransferase family	2.3.1.7	K00624
qsublack_gene_62445	22840.5	5599.33	81138.4	0.245149	3.55239	14.4907	0.352681	0.0114962	7.57756e-05	0.716613	0.17917	0.00140166	0.00121906	0.0202693	Au+	5.51e-95	KOG3771@1|root,KOG3771@2759|Eukaryota,38E8T@33154|Opisthokonta,3NV9C@4751|Fungi,3QK7W@4890|Ascomycota,20BNG@147545|Eurotiomycetes,3S7T1@5042|Eurotiales	4751|Fungi	U	BAR adaptor protein RVS161	-	K20120
qsublack_gene_62865	176391	7481.89	44128.1	0.0424165	0.250172	5.89799	1.08251e-05	0.00208924	0.684211	0.0113277	0.177283	0.897054	0.000468579	0.0172216	Sp+	4.37e-57	COG5577@1|root,COG5577@2|Bacteria,1V91D@1239|Firmicutes,4HJ0J@91061|Bacilli,1ZGWF@1386|Bacillus	91061|Bacilli	M	Spore coat protein	-	K06329
qsublack_gene_62976	68341.6	24840.3	235202	0.363473	3.44157	9.46856	0.970512	0.0089307	0.000205677	0.990388	0.177283	0.00258863	0.00225593	0.0258198	Au+	4.98e-167	COG2175@1|root,KOG3889@2759|Eukaryota,39K0H@33154|Opisthokonta,3Q4D9@4751|Fungi,3RMJF@4890|Ascomycota,20EJV@147545|Eurotiomycetes,3S3AP@5042|Eurotiales	4751|Fungi	I	Gamma-butyrobetaine	-	-
qsublack_gene_63485	107830	61962.1	217695	0.574626	2.01887	3.51336	0.0892096	0.0232306	1.08251e-05	0.396036	0.192276	0.000574593	0.000501098	0.0172216	Au+	0	COG2759@1|root,KOG4230@2759|Eukaryota,38DB3@33154|Opisthokonta,3NVZV@4751|Fungi,3QKMW@4890|Ascomycota,20ACJ@147545|Eurotiomycetes,3S6IW@5042|Eurotiales	4751|Fungi	H	C1 tetrahydrofolate synthase	1.5.1.5,3.5.4.9,6.3.4.3	K00288
qsublack_gene_63510	36350.8	11311.5	89074.5	0.311177	2.45041	7.87465	0.14314	0.035463	0.000324753	0.497156	0.214861	0.00350857	0.00240938	0.0262629	Au+	1.21e-94	COG0638@1|root,KOG0178@2759|Eukaryota,38HA3@33154|Opisthokonta,3NVH4@4751|Fungi,3QKCY@4890|Ascomycota,1ZYZJ@147541|Dothideomycetes	4751|Fungi	O	Proteasome subunit alpha type	3.4.25.1	K02728
qsublack_gene_63703	446576	256089	679710	0.573451	1.52205	2.65419	0.190316	0.0524259	0.00150469	0.555404	0.245851	0.0106594	0.00659176	0.0443957	Au+	1.71e-73	COG0655@1|root,KOG3135@2759|Eukaryota,38HWI@33154|Opisthokonta,3NU10@4751|Fungi,3QKH7@4890|Ascomycota,20DHX@147545|Eurotiomycetes,3S6C3@5042|Eurotiales	4751|Fungi	S	NADH-quinone oxidoreductase	1.6.5.2	K03809
qsublack_gene_63946	105528	40176.9	253686	0.380721	2.40396	6.31423	0.314999	0.0089307	1.08251e-05	0.689797	0.177283	0.000574593	0.000579756	0.0172216	Au+	3.8e-45	COG5019@1|root,KOG1547@2759|Eukaryota,38CPR@33154|Opisthokonta,3NUHB@4751|Fungi,3QJJP@4890|Ascomycota,20AMS@147545|Eurotiomycetes,3S7F0@5042|Eurotiales	4751|Fungi	DTZ	Belongs to the TRAFAC class TrmE-Era-EngA-EngB-Septin- like GTPase superfamily. Septin GTPase family	-	K16938
qsublack_gene_63949	133813	99748.4	352088	0.745434	2.63121	3.52976	0.352681	0.00388621	0.0089307	0.716613	0.177283	0.0414034	0.00641554	0.0437152	Au+	2e-46	COG0194@1|root,KOG0707@2759|Eukaryota,38FKZ@33154|Opisthokonta,3P1VP@4751|Fungi,3QU73@4890|Ascomycota,20DEC@147545|Eurotiomycetes,3S33E@5042|Eurotiales	4751|Fungi	F	Guanylate kinase	2.7.4.8	K00942
qsublack_gene_64330	18798.1	17915.7	51894.3	0.953058	2.76062	2.89659	0.630529	0.000324753	7.57756e-05	0.869797	0.177283	0.00140166	0.000318177	0.0172216	Au+	6.68e-79	COG0576@1|root,KOG3003@2759|Eukaryota,39SYX@33154|Opisthokonta,3NZQR@4751|Fungi,3QM01@4890|Ascomycota,20FX1@147545|Eurotiomycetes,3S2PX@5042|Eurotiales	4751|Fungi	O	Essential component of the PAM complex, a complex required for the translocation of transit peptide-containing proteins from the inner membrane into the mitochondrial matrix in an ATP-dependent manner	-	K03687
qsublack_gene_64353	297956	171521	544486	0.575659	1.8274	3.17445	0.14314	0.00388621	1.08251e-05	0.497156	0.177283	0.000574593	0.000266279	0.0172216	Au+	2.18e-153	COG0191@1|root,KOG4153@2759|Eukaryota,38EK5@33154|Opisthokonta,3NVQC@4751|Fungi,3QQSN@4890|Ascomycota,20CND@147545|Eurotiomycetes,3S6QK@5042|Eurotiales	4751|Fungi	G	fructose-bisphosphate aldolase	3.2.1.25,4.1.2.13	K01192,K01624
qsublack_gene_64357	41679.9	14394.4	95582.2	0.345354	2.29324	6.64026	0.0232306	0.0146896	4.33004e-05	0.208025	0.182685	0.00102315	0.000316948	0.0172216	Au+	3.09e-17	COG1748@1|root,KOG0172@2759|Eukaryota,38PC5@33154|Opisthokonta,3NWDX@4751|Fungi,3QQDB@4890|Ascomycota,217S3@147550|Sordariomycetes,1F1UM@1028384|Glomerellales	4751|Fungi	E	Belongs to the AlaDH PNT family	1.5.1.7,3.4.19.12	K00290,K11874
qsublack_gene_64527	306197	129903	623325	0.424245	2.0357	4.7984	0.0146896	0.0089307	1.08251e-05	0.169987	0.177283	0.000574593	0.00013736	0.0172216	Au+	1.69e-98	COG0059@1|root,2QQBF@2759|Eukaryota,38GR1@33154|Opisthokonta,3NVDN@4751|Fungi,3QMYC@4890|Ascomycota,20F3T@147545|Eurotiomycetes,3S2TG@5042|Eurotiales	4751|Fungi	E	Ketol-acid reductoisomerase	1.1.1.86	K00053
qsublack_gene_64559	27967.2	10049.8	64515	0.359342	2.30681	6.41955	0.435872	0.075256	0.000487129	0.762178	0.283857	0.00477035	0.00754816	0.0482463	Au+	1.39e-20	28JKR@1|root,2QRZZ@2759|Eukaryota,38ECS@33154|Opisthokonta,3NU6E@4751|Fungi,3QKR8@4890|Ascomycota,3RTCE@4891|Saccharomycetes	4751|Fungi	G	Splits internally a 1,3-beta-glucan molecule and transfers the newly generated reducing end (the donor) to the non- reducing end of another 1,3-beta-glucan molecule (the acceptor) forming a 1,3-beta linkage, resulting in the elongation of 1,3- beta-glucan chains in the cell wall	-	-
qsublack_gene_65392	22693	8455.5	63638	0.372603	2.80429	7.52622	0.970512	0.0089307	0.000129901	0.990388	0.177283	0.00195787	0.00191742	0.0240087	Au+	1.47e-87	COG1028@1|root,KOG0725@2759|Eukaryota,38I37@33154|Opisthokonta,3NU20@4751|Fungi,3QR7D@4890|Ascomycota,20FGA@147545|Eurotiomycetes,3S66K@5042|Eurotiales	4751|Fungi	Q	D-arabinitol dehydrogenase ArbD	1.1.1.250	K17738
qsublack_gene_65394	207636	96609.3	424965	0.465282	2.04668	4.3988	0.075256	0.0524259	7.57756e-05	0.366523	0.245851	0.00140166	0.00123968	0.0202693	Au+	1.94e-79	COG1960@1|root,KOG0141@2759|Eukaryota,38CQN@33154|Opisthokonta,3NW18@4751|Fungi,3QQ7U@4890|Ascomycota,20FHF@147545|Eurotiomycetes,3S4SS@5042|Eurotiales	4751|Fungi	E	Isovaleryl-CoA dehydrogenase	1.3.8.4	K00253
qsublack_gene_65693	8921.22	5812.6	20355.1	0.651547	2.28165	3.5019	0.684211	0.0432571	0.000205677	0.894493	0.228284	0.00258863	0.0049563	0.0378176	Au+	2.68e-77	COG1877@1|root,KOG1050@2759|Eukaryota,38EGS@33154|Opisthokonta,3NUM3@4751|Fungi,3QP00@4890|Ascomycota,20DQ5@147545|Eurotiomycetes,3S7EK@5042|Eurotiales	4751|Fungi	G	synthase	2.4.1.15,2.4.1.347	K00697
qsublack_gene_66169	227830	128162	392026	0.562533	1.72069	3.05883	0.14314	0.075256	0.000205677	0.497156	0.283857	0.00258863	0.00300421	0.029302	Au+	7.9e-56	KOG1876@1|root,KOG1876@2759|Eukaryota,38GVI@33154|Opisthokonta,3NY5W@4751|Fungi,3QJRU@4890|Ascomycota,20DJG@147545|Eurotiomycetes,3S5QM@5042|Eurotiales	4751|Fungi	Z	Functions as actin-binding component of the Arp2 3 complex which is involved in regulation of actin polymerization and together with an activating nucleation-promoting factor (NPF) mediates the formation of branched actin networks. Seems to contact the mother actin filament	-	K05755
qsublack_gene_66249	69603.5	38147	152394	0.548062	2.18945	3.9949	0.795936	0.0185434	0.000725281	0.941727	0.186069	0.00633972	0.00512539	0.0385457	Au+	1.51e-40	KOG0118@1|root,KOG0118@2759|Eukaryota,39JCJ@33154|Opisthokonta,3NV1Z@4751|Fungi,3QM6K@4890|Ascomycota,20CXD@147545|Eurotiomycetes,3B1SR@33183|Onygenales	4751|Fungi	A	Nuclear and cytoplasmic polyadenylated RNA-binding protein pub1	-	K13201
qsublack_gene_66341	195717	84379.3	333570	0.431128	1.70435	3.95322	0.190316	0.105122	0.000487129	0.555404	0.338025	0.00477035	0.00587662	0.0414304	Au+	2.2e-33	KOG1003@1|root,KOG1003@2759|Eukaryota,3A1H2@33154|Opisthokonta,3P2Z3@4751|Fungi,3QUB4@4890|Ascomycota,20GSG@147545|Eurotiomycetes,3S8Q0@5042|Eurotiales	4751|Fungi	Z	Tropomyosin	-	K17945
qsublack_gene_66510	21507.4	7070.09	73468.6	0.328728	3.41597	10.3915	0.105122	0.00684146	0.000129901	0.428982	0.177283	0.00195787	0.000658753	0.0173226	Au+	9.93e-198	KOG2291@1|root,KOG2291@2759|Eukaryota,38DP8@33154|Opisthokonta,3NXCK@4751|Fungi,3QNGU@4890|Ascomycota,20BUH@147545|Eurotiomycetes,3S56T@5042|Eurotiales	4751|Fungi	G	Essential subunit of the N-oligosaccharyl transferase (OST) complex which catalyzes the transfer of a high mannose oligosaccharide from a lipid-linked oligosaccharide donor to an asparagine residue within an Asn-X-Ser Thr consensus motif in nascent polypeptide chains	-	K12666
qsublack_gene_66531	22817.8	11737.9	64911.8	0.514419	2.84479	5.5301	1	0.00684146	0.000129901	1	0.177283	0.00195787	0.00168097	0.0226343	Au+	0	COG0525@1|root,KOG0432@2759|Eukaryota,38BX5@33154|Opisthokonta,3NXM3@4751|Fungi,3QNQ0@4890|Ascomycota,20CGR@147545|Eurotiomycetes,3S4ST@5042|Eurotiales	4751|Fungi	J	Belongs to the class-I aminoacyl-tRNA synthetase family	6.1.1.9	K01873
qsublack_gene_66767	31470.7	6196.79	68142.7	0.196907	2.16528	10.9965	0.0185434	0.217563	7.57756e-05	0.188391	0.494768	0.00140166	0.00123808	0.0202693	Au+	2.98e-97	COG0462@1|root,KOG0225@2759|Eukaryota,38G37@33154|Opisthokonta,3NUI6@4751|Fungi,3QPU2@4890|Ascomycota,20BWU@147545|Eurotiomycetes,3S32G@5042|Eurotiales	4751|Fungi	C	The pyruvate dehydrogenase complex catalyzes the overall conversion of pyruvate to acetyl-CoA and CO(2)	1.2.4.1	K00161
qsublack_gene_66973	34034.7	14067	134667	0.413314	3.95676	9.57325	0.970512	0.00287947	0.00150469	0.990388	0.177283	0.0106594	0.00275896	0.0280436	Au+	4.77e-176	COG0525@1|root,KOG0432@2759|Eukaryota,38BX5@33154|Opisthokonta,3NXM3@4751|Fungi,3QNQ0@4890|Ascomycota,20CGR@147545|Eurotiomycetes,3S4ST@5042|Eurotiales	4751|Fungi	J	Belongs to the class-I aminoacyl-tRNA synthetase family	6.1.1.9	K01873
qsublack_gene_66974	58120.6	21413.2	180605	0.368426	3.10742	8.4343	0.393048	0.00684146	2.16502e-05	0.732217	0.177283	0.000724144	0.000679473	0.0175251	Au+	0	COG0525@1|root,KOG0432@2759|Eukaryota,38BX5@33154|Opisthokonta,3NXM3@4751|Fungi,3QNQ0@4890|Ascomycota,20CGR@147545|Eurotiomycetes,3S4ST@5042|Eurotiales	4751|Fungi	J	Belongs to the class-I aminoacyl-tRNA synthetase family	6.1.1.9	K01873
qsublack_gene_66976	121449	14510.2	148521	0.119476	1.22291	10.2356	0.000487129	0.578742	1.08251e-05	0.0914928	0.797908	0.000574593	0.000195364	0.0172216	Au+	5.42e-105	KOG0668@1|root,KOG0668@2759|Eukaryota,38B6E@33154|Opisthokonta,3NWKT@4751|Fungi,3QMPQ@4890|Ascomycota,20DYW@147545|Eurotiomycetes,3S342@5042|Eurotiales	4751|Fungi	DKT	Belongs to the protein kinase superfamily	2.7.11.1	K03097
qsublack_gene_67302	32326.3	9303.22	56277	0.287791	1.7409	6.0492	0.0892096	0.14314	7.57756e-05	0.396036	0.394322	0.00140166	0.00232688	0.0261417	Au+	1.4e-250	COG1245@1|root,KOG0063@2759|Eukaryota,38BGA@33154|Opisthokonta,3NYJ0@4751|Fungi,3QKXC@4890|Ascomycota,20CP8@147545|Eurotiomycetes,3S2SG@5042|Eurotiales	4751|Fungi	A	RNase L inhibitor of the ABC superfamily	-	K06174
qsublack_gene_67398	97779.6	50045.5	271012	0.51182	2.77166	5.41531	0.853428	0.00519604	2.16502e-05	0.959386	0.177283	0.000724144	0.000818214	0.0179228	Au+	3.17e-35	COG0112@1|root,KOG2467@2759|Eukaryota,38EKT@33154|Opisthokonta,3NVHZ@4751|Fungi,3QKZB@4890|Ascomycota,20DWI@147545|Eurotiomycetes,3B0PM@33183|Onygenales	4751|Fungi	H	Interconversion of serine and glycine	2.1.2.1	K00600
qsublack_gene_67399	156445	68888.4	408890	0.440337	2.61363	5.93553	0.190316	0.00388621	7.57756e-05	0.555404	0.177283	0.00140166	0.000547051	0.0172216	Au+	3.92e-237	COG0112@1|root,KOG2467@2759|Eukaryota,38EKT@33154|Opisthokonta,3NVHZ@4751|Fungi,3QKZB@4890|Ascomycota,20DWI@147545|Eurotiomycetes,3S5ED@5042|Eurotiales	4751|Fungi	H	Interconversion of serine and glycine	2.1.2.1	K00600
qsublack_gene_67713	55421.6	16964.7	156597	0.306102	2.82556	9.23078	0.684211	0.0089307	7.57756e-05	0.894493	0.177283	0.00140166	0.00142873	0.0216676	Au+	3.79e-110	COG0111@1|root,KOG0068@2759|Eukaryota,38GJA@33154|Opisthokonta,3NU0Y@4751|Fungi,3QJMR@4890|Ascomycota,20CZU@147545|Eurotiomycetes,3S4M4@5042|Eurotiales	4751|Fungi	E	Belongs to the D-isomer specific 2-hydroxyacid dehydrogenase family	1.1.1.399,1.1.1.95	K00058
qsublack_gene_67843	28094.7	14098.2	67729.4	0.501808	2.41075	4.80413	0.578742	0.0146896	0.000205677	0.846164	0.182685	0.00258863	0.00245646	0.0266128	Au+	1.26e-200	COG1224@1|root,KOG2680@2759|Eukaryota,38DYY@33154|Opisthokonta,3NVB1@4751|Fungi,3QMDV@4890|Ascomycota,20DUJ@147545|Eurotiomycetes,3S7GB@5042|Eurotiales	4751|Fungi	L	participates in several chromatin remodeling complexes, including the SWR1 and the INO80 complexes	3.6.4.12	K11338
qsublack_gene_68116	22793.5	13165.5	55242.5	0.577599	2.42361	4.196	0.0892096	0.00287947	2.16502e-05	0.396036	0.177283	0.000724144	0.000231044	0.0172216	Au+	0	COG0458@1|root,KOG0370@2759|Eukaryota,38GWT@33154|Opisthokonta,3NUIJ@4751|Fungi,3QMH4@4890|Ascomycota,20AKK@147545|Eurotiomycetes,3S6RX@5042|Eurotiales	4751|Fungi	EF	Carbamoyl-phosphate synthase, large subunit	6.3.5.5	K01955
qsublack_gene_68292	106178	55821.7	212976	0.525735	2.00583	3.81528	0.0432571	0.035463	0.000129901	0.279663	0.214861	0.00195787	0.000938139	0.0187756	Au+	1.61e-14	COG0183@1|root,KOG1389@2759|Eukaryota,38F89@33154|Opisthokonta,3BC3T@33208|Metazoa,3D2IK@33213|Bilateria,48905@7711|Chordata,494Q2@7742|Vertebrata,3JB2D@40674|Mammalia	33208|Metazoa	I	belongs to the thiolase family	2.3.1.16	K07513
qsublack_gene_68314	512191	240176	949194	0.468919	1.8532	3.95207	0.0288056	0.0524259	4.33004e-05	0.230602	0.245851	0.00102315	0.000633741	0.0172216	Au+	2.78e-87	COG0022@1|root,KOG0524@2759|Eukaryota,38C5V@33154|Opisthokonta,3NU6T@4751|Fungi,3QMNS@4890|Ascomycota,20BCT@147545|Eurotiomycetes,3S5T0@5042|Eurotiales	4751|Fungi	C	The pyruvate dehydrogenase complex catalyzes the overall conversion of pyruvate to acetyl-CoA and CO2	1.2.4.1	K00162
qsublack_gene_68321	29643	16122.4	77726.9	0.543887	2.6221	4.82103	0.481251	0.00519604	2.16502e-05	0.791994	0.177283	0.000724144	0.00064696	0.0172327	Au+	3.09e-62	COG0331@1|root,2QQJX@2759|Eukaryota,38EJX@33154|Opisthokonta,3NV76@4751|Fungi,3QK1N@4890|Ascomycota,20ECY@147545|Eurotiomycetes,3S5TG@5042|Eurotiales	4751|Fungi	Q	fatty acid synthase	2.3.1.86	K00667,K00668
qsublack_gene_68365	42178.3	20689.7	127226	0.49053	3.0164	6.14926	0.481251	0.00519604	0.000324753	0.791994	0.177283	0.00350857	0.00158614	0.0221777	Au+	1.9e-237	COG1024@1|root,KOG1684@2759|Eukaryota,38EBG@33154|Opisthokonta,3NV3G@4751|Fungi,3QN91@4890|Ascomycota,20E7R@147545|Eurotiomycetes,3S463@5042|Eurotiales	4751|Fungi	I	Belongs to the enoyl-CoA hydratase isomerase family	3.1.2.4	K05605
qsublack_gene_68662	31587.8	17451.2	64582.1	0.552465	2.04452	3.70073	0.075256	0.0288056	0.000487129	0.366523	0.203276	0.00477035	0.00191742	0.0240087	Au+	3.67e-17	COG0484@1|root,KOG0714@2759|Eukaryota,38BTN@33154|Opisthokonta,3NW97@4751|Fungi,3QNCB@4890|Ascomycota,21510@147550|Sordariomycetes,41MYD@639021|Magnaporthales	4751|Fungi	O	DnaJ C terminal domain	-	K09510
qsublack_gene_68697	162562	82255.2	274462	0.505992	1.68835	3.33671	0.00519604	0.0232306	1.08251e-05	0.121601	0.192276	0.000574593	0.000133172	0.0172216	Au+	2.41e-151	COG3173@1|root,KOG1469@2759|Eukaryota,38BWX@33154|Opisthokonta,3NUVD@4751|Fungi,3QKUK@4890|Ascomycota,20ES7@147545|Eurotiomycetes,3S5GM@5042|Eurotiales	4751|Fungi	E	Acyl-CoA dehydrogenase family protein	1.3.8.7	K00249
qsublack_gene_69108	24392	12138.6	49902.1	0.497646	2.04584	4.11103	0.0630128	0.0630128	0.000129901	0.339389	0.262853	0.00195787	0.00149666	0.0217954	Au+	3.15e-185	2EDEZ@1|root,2SJ2P@2759|Eukaryota,39ZQW@33154|Opisthokonta,3P04N@4751|Fungi,3QTSB@4890|Ascomycota,20EXZ@147545|Eurotiomycetes,3S5WW@5042|Eurotiales	4751|Fungi	S	BNR Asp-box repeat domain protein	-	-
qsublack_gene_69115	70322.2	53462.8	120341	0.760255	1.71128	2.25093	0.630529	0.0146896	0.00287947	0.869797	0.182685	0.0177096	0.00766594	0.0485333	Au+	6.58e-207	KOG1854@1|root,KOG1854@2759|Eukaryota,39J8V@33154|Opisthokonta,3Q3JX@4751|Fungi,3RKMN@4890|Ascomycota,20DTW@147545|Eurotiomycetes,3S4E4@5042|Eurotiales	4751|Fungi	M	Component of the MICOS complex, a large protein complex of the mitochondrial inner membrane that plays crucial roles in the maintenance of crista junctions, inner membrane architecture, and formation of contact sites to the outer membrane	-	K17785
qsublack_gene_69206	22708.1	6353.98	61722.8	0.279811	2.7181	9.71403	0.0288056	0.0432571	0.00150469	0.230602	0.228284	0.0106594	0.00255342	0.0269507	Au+	1.08e-222	COG0476@1|root,KOG2016@2759|Eukaryota,38CHG@33154|Opisthokonta,3NUPG@4751|Fungi,3QJFX@4890|Ascomycota,20AH1@147545|Eurotiomycetes,3S50S@5042|Eurotiales	4751|Fungi	O	Regulatory subunit of the dimeric UBA3-ULA1 E1 enzyme	-	K04532
qsublack_gene_69274	204123	121122	382103	0.593375	1.87192	3.1547	0.352681	0.075256	0.000324753	0.716613	0.283857	0.00350857	0.00575654	0.0408591	Au+	1.64e-218	COG0059@1|root,2QQBF@2759|Eukaryota,38GR1@33154|Opisthokonta,3NVDN@4751|Fungi,3QMYC@4890|Ascomycota,20F3T@147545|Eurotiomycetes,3S2TG@5042|Eurotiales	4751|Fungi	E	Ketol-acid reductoisomerase	1.1.1.86	K00053
qsublack_gene_70145	13922.6	6684.5	30793.7	0.480119	2.21178	4.60674	0.630529	0.035463	7.57756e-05	0.869797	0.214861	0.00140166	0.00304322	0.0294068	Au+	3.88e-70	COG0214@1|root,KOG3035@2759|Eukaryota,38HFB@33154|Opisthokonta,3P22Z@4751|Fungi,3QUAG@4890|Ascomycota,20FZX@147545|Eurotiomycetes,3S4KI@5042|Eurotiales	4751|Fungi	I	GDSL Lipase Acylhydrolase family protein	-	-
qsublack_gene_70356	178280	73882	274370	0.414416	1.53899	3.71363	0.075256	0.123005	0.000725281	0.366523	0.367761	0.00633972	0.00462271	0.0365279	Au+	1.36e-80	COG1232@1|root,2QQ27@2759|Eukaryota,38NWR@33154|Opisthokonta,3NUM6@4751|Fungi,3QJTI@4890|Ascomycota,20BUT@147545|Eurotiomycetes,3S7WV@5042|Eurotiales	4751|Fungi	H	Flavin containing amine oxidoreductase	-	-
qsublack_gene_70358	23219.4	11311	54704.5	0.487135	2.35598	4.83641	0.14314	0.0432571	0.000205677	0.497156	0.228284	0.00258863	0.00223853	0.025701	Au+	2.23e-128	COG1232@1|root,2QQ27@2759|Eukaryota,38NWR@33154|Opisthokonta,3NUM6@4751|Fungi,3QJTI@4890|Ascomycota,20BUT@147545|Eurotiomycetes,3S7WV@5042|Eurotiales	4751|Fungi	H	Flavin containing amine oxidoreductase	-	-
qsublack_gene_70501	26220.9	12163.1	86097.1	0.463872	3.28353	7.07853	0.911797	0.00287947	0.000205677	0.975879	0.177283	0.00258863	0.00122379	0.0202693	Au+	3.65e-68	COG0316@1|root,KOG1119@2759|Eukaryota,3A5SF@33154|Opisthokonta,3P4Q9@4751|Fungi,3QW4U@4890|Ascomycota,20HEM@147545|Eurotiomycetes,3S8SB@5042|Eurotiales	4751|Fungi	CU	Iron-sulfur cluster assembly accessory protein Isa2	-	K22072
qsublack_gene_70531	24059.1	6708.71	72534.9	0.278843	3.01487	10.812	0.165494	0.0185434	0.000487129	0.527292	0.186069	0.00477035	0.00222988	0.0256822	Au+	1.13e-102	COG5026@1|root,KOG1369@2759|Eukaryota,38DFC@33154|Opisthokonta,3NW32@4751|Fungi,3QNBF@4890|Ascomycota,20EF5@147545|Eurotiomycetes,3S3D2@5042|Eurotiales	4751|Fungi	G	Belongs to the hexokinase family	2.7.1.1	K00844
qsublack_gene_70656	14120.7	6207.33	38535.1	0.439591	2.72898	6.208	0.393048	0.0232306	0.00150469	0.732217	0.192276	0.0106594	0.00600695	0.0419856	Au+	9.08e-169	COG0142@1|root,KOG0711@2759|Eukaryota,38DEA@33154|Opisthokonta,3NXTX@4751|Fungi,3QKJ6@4890|Ascomycota,20EFY@147545|Eurotiomycetes,3S6TG@5042|Eurotiales	4751|Fungi	H	Belongs to the FPP GGPP synthase family	2.5.1.1,2.5.1.10	K00787
qsublack_gene_70976	148715	77613.8	318765	0.521898	2.14347	4.10706	0.314999	0.0524259	7.57756e-05	0.689797	0.245851	0.00140166	0.0026542	0.0275773	Au+	7.89e-70	KOG0092@1|root,KOG0092@2759|Eukaryota,38HB3@33154|Opisthokonta,3NVI3@4751|Fungi,3QRUG@4890|Ascomycota,20DI0@147545|Eurotiomycetes,3S3JG@5042|Eurotiales	4751|Fungi	U	RAB GTPase Ypt5	-	K07889,K17785
qsublack_gene_71267	151480	105642	361972	0.6974	2.38957	3.4264	0.853428	0.00287947	0.000205677	0.959386	0.177283	0.00258863	0.00120498	0.0202693	Au+	2.35e-115	COG0045@1|root,KOG2799@2759|Eukaryota,38D0K@33154|Opisthokonta,3NUY0@4751|Fungi,3QN4R@4890|Ascomycota,20ANX@147545|Eurotiomycetes,3S7DE@5042|Eurotiales	4751|Fungi	C	Succinyl-CoA synthetase functions in the citric acid cycle (TCA), coupling the hydrolysis of succinyl-CoA to the synthesis of ATP and thus represents the only step of substrate- level phosphorylation in the TCA. The beta subunit provides nucleotide specificity of the enzyme and binds the substrate succinate, while the binding sites for coenzyme A and phosphate are found in the alpha subunit	6.2.1.4,6.2.1.5	K01900
qsublack_gene_71342	41076.1	7605.88	142955	0.185165	3.48024	18.7953	0.528849	0.0114962	0.000725281	0.821246	0.17917	0.00633972	0.00341797	0.0311014	Au+	1.49e-51	KOG3151@1|root,KOG3151@2759|Eukaryota,38EJH@33154|Opisthokonta,3NXSX@4751|Fungi,3QKDM@4890|Ascomycota,20ATK@147545|Eurotiomycetes,3S47B@5042|Eurotiales	4751|Fungi	O	Proteasome regulatory particle subunit (RpnL)	-	K03031
qsublack_gene_71429	168008	114365	371959	0.680712	2.21394	3.25239	0.578742	0.0114962	7.57756e-05	0.846164	0.17917	0.00140166	0.00152788	0.022031	Au+	1.21e-76	COG0625@1|root,KOG0867@2759|Eukaryota,39928@33154|Opisthokonta,3NZ93@4751|Fungi,3QJMZ@4890|Ascomycota,20F0T@147545|Eurotiomycetes,3S3MK@5042|Eurotiales	4751|Fungi	O	Glutathione S-transferase, N-terminal domain	2.5.1.18	K00799
qsublack_gene_71583	16606.7	7668.18	53870.3	0.461751	3.24388	7.02518	0.190316	0.00519604	7.57756e-05	0.555404	0.177283	0.00140166	0.000624003	0.0172216	Au+	0	COG0143@1|root,KOG1247@2759|Eukaryota,38BWQ@33154|Opisthokonta,3NXU3@4751|Fungi,3QJEP@4890|Ascomycota,20G5E@147545|Eurotiomycetes,3AZUZ@33183|Onygenales,3FIRG@34383|Onygenales incertae sedis	4751|Fungi	J	Belongs to the class-I aminoacyl-tRNA synthetase family	6.1.1.10	K01874
qsublack_gene_72381	70213.9	32969	132517	0.46955	1.88733	4.01944	0.0432571	0.0232306	7.57756e-05	0.279663	0.192276	0.00140166	0.000633741	0.0172216	Au+	1.83e-163	COG0604@1|root,KOG1197@2759|Eukaryota,38TSA@33154|Opisthokonta,3NV2G@4751|Fungi,3QN1S@4890|Ascomycota,20CMA@147545|Eurotiomycetes,3S3GU@5042|Eurotiales	4751|Fungi	C	Quinone oxidoreductase	1.6.5.5	K00344
qsublack_gene_72406	17447.5	6470.16	47889.2	0.370836	2.74476	7.40155	0.00287947	0.0432571	0.00287947	0.109855	0.228284	0.0177096	0.00145854	0.021757	Au+	2.52e-88	KOG2081@1|root,KOG2081@2759|Eukaryota,38GMX@33154|Opisthokonta,3NUD3@4751|Fungi,3QN4H@4890|Ascomycota,20ATA@147545|Eurotiomycetes,3S52A@5042|Eurotiales	4751|Fungi	U	mRNA transport regulator (Mtr10)	-	K15436
qsublack_gene_72531	87703.4	64025.6	263002	0.730024	2.99876	4.10776	0.435872	0.000725281	4.33004e-05	0.762178	0.177283	0.00102315	0.000306096	0.0172216	Au+	1.62000000001066e-313	COG2303@1|root,KOG1238@2759|Eukaryota,38UEK@33154|Opisthokonta,3NW9R@4751|Fungi,3QQIA@4890|Ascomycota,20ACT@147545|Eurotiomycetes,3S7AP@5042|Eurotiales	4751|Fungi	E	GMC oxidoreductase	-	-
qsublack_gene_72534	43794.3	17986.6	86999.6	0.410705	1.98655	4.83692	0.0432571	0.035463	2.16502e-05	0.279663	0.214861	0.000724144	0.000524923	0.0172216	Au+	5.39e-203	COG1012@1|root,KOG2450@2759|Eukaryota,38CDB@33154|Opisthokonta,3NX7B@4751|Fungi,3QK6X@4890|Ascomycota,20BVV@147545|Eurotiomycetes,3S890@5042|Eurotiales	4751|Fungi	E	Belongs to the aldehyde dehydrogenase family	1.2.1.8	K00130
qsublack_gene_73867	10792.7	6365.34	49645.6	0.589782	4.59993	7.79937	0.0892096	0.00519604	0.000487129	0.396036	0.177283	0.00477035	0.000962664	0.0190068	Au+	0	COG0331@1|root,2QQJX@2759|Eukaryota,38EJX@33154|Opisthokonta,3NV76@4751|Fungi,3QK1N@4890|Ascomycota,20ECY@147545|Eurotiomycetes,3S5TG@5042|Eurotiales	4751|Fungi	Q	fatty acid synthase	2.3.1.86	K00667,K00668
qsublack_gene_74432	28873.4	13201.8	71637.8	0.457232	2.4811	5.42636	0.0432571	0.0432571	0.000129901	0.279663	0.228284	0.00195787	0.00103213	0.0193855	Au+	6.61e-97	COG0090@1|root,KOG2309@2759|Eukaryota,38BCB@33154|Opisthokonta,3NU8K@4751|Fungi,3QMEZ@4890|Ascomycota,20E9D@147545|Eurotiomycetes,3B19M@33183|Onygenales,3FMUQ@34383|Onygenales incertae sedis	4751|Fungi	J	60S ribosomal protein	-	K02938
qsublack_gene_75411	15221.5	6491.33	36142.7	0.426458	2.37446	5.56785	0.0114962	0.105122	0.000487129	0.154231	0.338025	0.00477035	0.00145854	0.021757	Au+	1.44e-10	COG1957@1|root,KOG2938@2759|Eukaryota,39R5Q@33154|Opisthokonta,3NWEU@4751|Fungi,3QPXR@4890|Ascomycota,214ST@147550|Sordariomycetes,3U79B@5139|Sordariales,3UKJM@5148|Sordariaceae	4751|Fungi	G	Inosine-uridine preferring nucleoside hydrolase	-	-
qsublack_gene_75866	70633.9	25439.5	130040	0.36016	1.84104	5.11173	0.000324753	0.0185434	1.08251e-05	0.0792938	0.186069	0.000574593	4.35074e-05	0.0172216	Au+	2.11e-29	COG0244@1|root,KOG0815@2759|Eukaryota,38BU8@33154|Opisthokonta,3NWY4@4751|Fungi,3QMME@4890|Ascomycota,20CAW@147545|Eurotiomycetes,3B1HE@33183|Onygenales,3FYAA@34384|Arthrodermataceae	4751|Fungi	J	Ribosomal protein P0 is the functional equivalent of E.coli protein L10	-	K02941
qsublack_gene_75867	102693	47672	182451	0.464219	1.77666	3.82721	0.0185434	0.0892096	1.08251e-05	0.188391	0.310875	0.000574593	0.00044731	0.0172216	Au+	3.39e-116	COG0244@1|root,KOG0815@2759|Eukaryota,38BU8@33154|Opisthokonta,3NWY4@4751|Fungi,3QMME@4890|Ascomycota,20CAW@147545|Eurotiomycetes,3S6SI@5042|Eurotiales	4751|Fungi	J	Ribosomal protein P0 is the functional equivalent of E.coli protein L10	-	K02941
qsublack_gene_75981	30677.5	6547.37	70293.8	0.213426	2.29138	10.7362	0.0288056	0.123005	0.00519604	0.230602	0.367761	0.0276405	0.00772552	0.0488261	Au+	3.65e-63	KOG0092@1|root,KOG0092@2759|Eukaryota,38HB3@33154|Opisthokonta,3NVI3@4751|Fungi,3QRUG@4890|Ascomycota,20DI0@147545|Eurotiomycetes,3S3JG@5042|Eurotiales	4751|Fungi	U	RAB GTPase Ypt5	-	K07889,K17785
qsublack_gene_75983	23021.4	10338	63375.2	0.449062	2.75288	6.13029	0.481251	0.0146896	0.000324753	0.791994	0.182685	0.00350857	0.0026852	0.027664	Au+	0	COG5329@1|root,KOG1889@2759|Eukaryota,38DI4@33154|Opisthokonta,3NUMD@4751|Fungi,3QP62@4890|Ascomycota,20AWK@147545|Eurotiomycetes,3S2QV@5042|Eurotiales	4751|Fungi	I	Phosphoinositide phosphatase (Sac1)	-	K21797
qsublack_gene_76065	14798.1	7227.9	17875.7	0.488433	1.20797	2.47315	2.16502e-05	0.165494	0.105122	0.0132156	0.426096	0.30126	0.00194734	0.0242178	Sp+	1.22e-122	COG0529@1|root,KOG0635@2759|Eukaryota,39J77@33154|Opisthokonta,3NW9X@4751|Fungi,3QKIT@4890|Ascomycota,20APM@147545|Eurotiomycetes,3S5BC@5042|Eurotiales	4751|Fungi	P	Catalyzes the synthesis of activated sulfate	2.7.1.25	K00860
qsublack_gene_76066	61417.4	25906.8	107230	0.421815	1.74592	4.13906	0.0232306	0.217563	0.00208924	0.208025	0.494768	0.0138998	0.00549525	0.0399056	Au+	1.99e-74	COG5127@1|root,KOG2909@2759|Eukaryota,38C54@33154|Opisthokonta,3NVXU@4751|Fungi,3QQNF@4890|Ascomycota,20BC1@147545|Eurotiomycetes,3S4AK@5042|Eurotiales	4751|Fungi	C	Subunit of the peripheral V1 complex of vacuolar ATPase. Subunit C is necessary for the assembly of the catalytic sector of the enzyme and is likely to have a specific function in its catalytic activity. V-ATPase is responsible for acidifying a variety of intracellular compartments in eukaryotic cells	-	K02148
qsublack_gene_76095	88688.7	61881.1	152646	0.697734	1.72115	2.46677	0.0892096	0.0089307	0.000324753	0.396036	0.177283	0.00350857	0.00100844	0.0193855	Au+	4.62e-220	COG0114@1|root,COG0657@1|root,KOG1317@2759|Eukaryota,KOG1515@2759|Eukaryota,38GHX@33154|Opisthokonta,3NTY2@4751|Fungi,3QMAA@4890|Ascomycota,20DMH@147545|Eurotiomycetes,3S5GB@5042|Eurotiales	4751|Fungi	C	Fumarate hydratase	4.2.1.2	K01679
qsublack_gene_76172	13673.1	5663.16	39895.7	0.414184	2.91784	7.04478	0.217563	0.0630128	4.33004e-05	0.588496	0.262853	0.00102315	0.00201898	0.0246074	Au+	3.24e-19	2E4JP@1|root,2SBFH@2759|Eukaryota,3A7EQ@33154|Opisthokonta,3P5XT@4751|Fungi,3QXA7@4890|Ascomycota,20II8@147545|Eurotiomycetes,3S913@5042|Eurotiales	4751|Fungi	-	-	-	-
qsublack_gene_76395	14501.4	7928.06	25263.9	0.546709	1.74217	3.18665	0.0630128	0.075256	0.000725281	0.339389	0.283857	0.00633972	0.0033223	0.0306112	Au+	1.19e-55	COG1100@1|root,KOG0395@2759|Eukaryota,38C7W@33154|Opisthokonta,3NUEZ@4751|Fungi,3QQ90@4890|Ascomycota,1ZZXE@147541|Dothideomycetes	4751|Fungi	S	Ras subfamily of RAS small GTPases	-	K07827
qsublack_gene_76473	351101	229701	908056	0.654232	2.58631	3.9532	1	0.0185434	0.00150469	1	0.186069	0.0106594	0.00741303	0.0479262	Au+	1.45e-85	COG0685@1|root,2QR1E@2759|Eukaryota,38E3T@33154|Opisthokonta,3NW1F@4751|Fungi,3QMDA@4890|Ascomycota,20CZM@147545|Eurotiomycetes,3S5AR@5042|Eurotiales	4751|Fungi	C	Belongs to the peroxidase family	1.11.1.5	K00428
qsublack_gene_76552	4.08105e+06	1.37994e+06	6.38765e+06	0.338134	1.5652	4.62893	0.00150469	0.075256	1.08251e-05	0.10398	0.283857	0.000574593	0.000133172	0.0172216	Au+	3.01e-15	COG2032@1|root,KOG0441@2759|Eukaryota,3A1IR@33154|Opisthokonta,3P1VF@4751|Fungi,3QU26@4890|Ascomycota,20GRI@147545|Eurotiomycetes,3S8F1@5042|Eurotiales	4751|Fungi	P	Destroys radicals which are normally produced within the cells and which are toxic to biological systems	1.15.1.1	K04565
qsublack_gene_76634	11797	6410.66	33401.5	0.543415	2.83136	5.2103	0.035463	0.0114962	0.000324753	0.255676	0.17917	0.00350857	0.000757258	0.0178661	Au+	0	COG0173@1|root,KOG2411@2759|Eukaryota,38HAY@33154|Opisthokonta,3NUX2@4751|Fungi,3QK8X@4890|Ascomycota,20EDP@147545|Eurotiomycetes,3S64K@5042|Eurotiales	4751|Fungi	J	Aspartyl-tRNA synthetase	6.1.1.12	K01876
qsublack_gene_77722	11995.1	6455.66	46885.9	0.538191	3.90875	7.26276	0.217563	0.00684146	0.000725281	0.588496	0.177283	0.00633972	0.0018734	0.0238436	Au+	3.42e-179	2AWSK@1|root,2RZZG@2759|Eukaryota,38H3V@33154|Opisthokonta,3NYFK@4751|Fungi,3QK6B@4890|Ascomycota,20G87@147545|Eurotiomycetes,3S493@5042|Eurotiales	4751|Fungi	-	-	-	-
qsublack_gene_77820	75587.8	40962.3	106503	0.541917	1.409	2.60002	0.0114962	0.279861	0.000205677	0.154231	0.564889	0.00258863	0.00156985	0.0221138	Au+	4.91e-121	28MZB@1|root,2QUI6@2759|Eukaryota,38HPW@33154|Opisthokonta,3NZ44@4751|Fungi,3QMTA@4890|Ascomycota,20CA5@147545|Eurotiomycetes,3S4U3@5042|Eurotiales	4751|Fungi	S	Transcription factor RfeF	-	-
qsublack_gene_78575	16821.8	7097	79536.2	0.421893	4.72817	11.207	0.0630128	0.00519604	4.33004e-05	0.339389	0.177283	0.00102315	0.000313288	0.0172216	Au+	5.77e-54	KOG0077@1|root,KOG0077@2759|Eukaryota,38URR@33154|Opisthokonta,3NV7B@4751|Fungi,3QK5V@4890|Ascomycota,20AR2@147545|Eurotiomycetes,3B06A@33183|Onygenales,3FKQU@34383|Onygenales incertae sedis	4751|Fungi	U	Belongs to the small GTPase superfamily. SAR1 family	-	K07953
qsublack_gene_78612	48824	15458	58664.6	0.316607	1.20155	3.7951	0.0232306	0.247451	0.000324753	0.208025	0.528602	0.00350857	0.00252394	0.0269502	Au+	8.54e-276	COG0165@1|root,KOG1316@2759|Eukaryota,38CSU@33154|Opisthokonta,3NVYH@4751|Fungi,3QJTP@4890|Ascomycota,20DVP@147545|Eurotiomycetes,3S4DF@5042|Eurotiales	4751|Fungi	E	Argininosuccinate lyase	4.3.2.1	K01755
qsublack_gene_78621	305153	135144	556865	0.442873	1.82487	4.12053	0.0232306	0.0630128	7.57756e-05	0.208025	0.262853	0.00140166	0.000757258	0.0178661	Au+	1.02e-82	COG0362@1|root,KOG2653@2759|Eukaryota,38BP7@33154|Opisthokonta,3NVGP@4751|Fungi,3QNUN@4890|Ascomycota,20ACR@147545|Eurotiomycetes,3S60I@5042|Eurotiales	4751|Fungi	G	Catalyzes the oxidative decarboxylation of 6- phosphogluconate to ribulose 5-phosphate and CO(2), with concomitant reduction of NADP to NADPH	1.1.1.343,1.1.1.44	K00033
qsublack_gene_78835	12262	6100.49	34607.2	0.49751	2.8223	5.67285	0.0630128	0.0232306	0.00150469	0.339389	0.192276	0.0106594	0.00273062	0.0279355	Au+	4.05e-265	KOG0401@1|root,KOG0401@2759|Eukaryota,38BXU@33154|Opisthokonta,3NY2A@4751|Fungi,3QJBI@4890|Ascomycota,20DMM@147545|Eurotiomycetes,3S3VJ@5042|Eurotiales	4751|Fungi	J	eukaryotic translation initiation factor	-	K03260
qsublack_gene_78913	798594	386545	1.26323e+06	0.484031	1.58182	3.26802	0.0232306	0.123005	0.000324753	0.208025	0.367761	0.00350857	0.00181627	0.0233817	Au+	2.94e-142	COG0513@1|root,KOG0327@2759|Eukaryota,38CTS@33154|Opisthokonta,3NUYA@4751|Fungi,3QM4H@4890|Ascomycota,20APX@147545|Eurotiomycetes,3S6UY@5042|Eurotiales	4751|Fungi	J	ATP-dependent RNA helicase which is a subunit of the eIF4F complex involved in cap recognition and is required for mRNA binding to ribosome. In the current model of translation initiation, eIF4A unwinds RNA secondary structures in the 5'-UTR of mRNAs which is necessary to allow efficient binding of the small ribosomal subunit, and subsequent scanning for the initiator codon (By similarity)	-	K03257
qsublack_gene_79192	43057.1	16310.3	130930	0.378806	3.04085	8.02745	0.217563	0.0114962	0.00150469	0.588496	0.17917	0.0106594	0.00334812	0.030618	Au+	1.24e-205	COG0112@1|root,KOG2467@2759|Eukaryota,38EKT@33154|Opisthokonta,3NVHZ@4751|Fungi,3QKZB@4890|Ascomycota,20C46@147545|Eurotiomycetes,3S7TG@5042|Eurotiales	4751|Fungi	H	Interconversion of serine and glycine	2.1.2.1	K00600
qsublack_gene_79316	179658	84986.6	451859	0.473045	2.5151	5.31682	0.970512	0.0114962	0.000487129	0.990388	0.17917	0.00477035	0.00356665	0.0316675	Au+	1.09e-44	KOG1207@1|root,KOG1207@2759|Eukaryota,39KBD@33154|Opisthokonta,3Q4Q4@4751|Fungi,3RMZN@4890|Ascomycota,20UQ1@147545|Eurotiomycetes	4751|Fungi	Q	Enoyl-(Acyl carrier protein) reductase	-	-
qsublack_gene_79479	317771	156283	519675	0.491811	1.63538	3.32522	0.0524259	0.165494	0.000487129	0.309444	0.426096	0.00477035	0.00376042	0.0325207	Au+	1.08e-79	COG1358@1|root,KOG3406@2759|Eukaryota,3A22P@33154|Opisthokonta,3P1R7@4751|Fungi,3QUH4@4890|Ascomycota	4751|Fungi	J	Belongs to the eukaryotic ribosomal protein eS12 family	-	K02951
qsublack_gene_79747	41731.6	22058.9	86105.8	0.528589	2.06332	3.90346	0.435872	0.0432571	0.00105003	0.762178	0.228284	0.00838767	0.00749962	0.0481461	Au+	4.06e-208	COG0554@1|root,KOG0726@2759|Eukaryota,38B4Z@33154|Opisthokonta,3NUR9@4751|Fungi,3QK55@4890|Ascomycota,20D57@147545|Eurotiomycetes,3S5P0@5042|Eurotiales	4751|Fungi	O	Belongs to the AAA ATPase family	-	K03062
qsublack_gene_79900	52364.7	13125.9	157017	0.250663	2.99853	11.9624	0.853428	0.0089307	2.16502e-05	0.959386	0.177283	0.000724144	0.00110376	0.0199913	Au+	4.09e-300	COG5256@1|root,KOG0459@2759|Eukaryota,38F7M@33154|Opisthokonta,3NVHC@4751|Fungi,3QJF4@4890|Ascomycota,20AHX@147545|Eurotiomycetes,3S3Q5@5042|Eurotiales	4751|Fungi	J	release factor	-	K03267
qsublack_gene_80425	71083	41645.8	145155	0.585876	2.04205	3.48546	0.314999	0.0288056	0.000205677	0.689797	0.203276	0.00258863	0.00267483	0.0276348	Au+	2.92e-40	COG5227@1|root,KOG1769@2759|Eukaryota,3A3FU@33154|Opisthokonta,3P5B7@4751|Fungi,3QXI6@4890|Ascomycota,20IGC@147545|Eurotiomycetes,3S9CP@5042|Eurotiales	4751|Fungi	O	Ubiquitin-like modifier SUMO	-	K12160
qsublack_gene_81304	13144.2	5988.43	45541.5	0.455596	3.46477	7.60492	0.190316	0.0288056	0.00150469	0.555404	0.203276	0.0106594	0.00489275	0.0375282	Au+	1.46e-103	KOG2366@1|root,KOG2366@2759|Eukaryota,39DKM@33154|Opisthokonta,3P1NJ@4751|Fungi,3RCAZ@4890|Ascomycota,20MQJ@147545|Eurotiomycetes,3SARS@5042|Eurotiales	4751|Fungi	G	Alpha galactosidase A	3.2.1.22	K07407
qsublack_gene_82033	11338.8	7075.58	27462.2	0.624013	2.42196	3.88127	0.911797	0.0114962	0.000725281	0.975879	0.17917	0.00633972	0.00409469	0.0342393	Au+	1.79e-34	COG5077@1|root,KOG1863@2759|Eukaryota,38CVI@33154|Opisthokonta,3NWAD@4751|Fungi,3QJFE@4890|Ascomycota,211ID@147550|Sordariomycetes,1EUJ1@1028384|Glomerellales	4751|Fungi	O	Belongs to the peptidase C19 family	3.4.19.12	K11838
qsublack_gene_82308	56519.4	8528.86	108530	0.150901	1.92022	12.725	0.0232306	0.14314	7.57756e-05	0.208025	0.394322	0.00140166	0.0011297	0.0199913	Au+	1.04e-121	COG5277@1|root,KOG0677@2759|Eukaryota,38C7E@33154|Opisthokonta,3NU86@4751|Fungi,3QKCJ@4890|Ascomycota,20CAV@147545|Eurotiomycetes,3S542@5042|Eurotiales	4751|Fungi	Z	Belongs to the actin family	-	K17260
qsublack_gene_82677	108289	44867	188951	0.414328	1.74488	4.21135	0.0630128	0.217563	0.000487129	0.339389	0.494768	0.00477035	0.00476196	0.0369506	Au+	6.56e-187	COG1063@1|root,KOG0024@2759|Eukaryota,38BYX@33154|Opisthokonta,3NU8H@4751|Fungi,3QNCA@4890|Ascomycota,20AV9@147545|Eurotiomycetes,3S397@5042|Eurotiales	4751|Fungi	Q	Xylitol dehydrogenase which catalyzes the conversion of xylitol to D-xylulose. Xylose is a major component of hemicelluloses such as xylan. Most fungi utilize D-xylose via three enzymatic reactions, xylose reductase (XR), xylitol dehydrogenase (XDH), and xylulokinase, to form xylulose 5- phosphate, which enters pentose phosphate pathway (By similarity)	1.1.1.14,1.1.1.9	K00008,K05351
qsublack_gene_82830	21007.1	6599.82	78435.8	0.31417	3.73377	11.8845	0.0089307	0.0146896	4.33004e-05	0.140682	0.182685	0.00102315	0.000209733	0.0172216	Au+	2.6e-138	COG2070@1|root,2QQW7@2759|Eukaryota,38HPS@33154|Opisthokonta,3NVAM@4751|Fungi,3QKCA@4890|Ascomycota,20D5Q@147545|Eurotiomycetes,3S63R@5042|Eurotiales	4751|Fungi	E	2-nitropropane dioxygenase family oxidoreductase	-	-
qsublack_gene_83265	60977.3	29682.1	97763.2	0.486773	1.60327	3.29368	0.075256	0.0892096	0.00208924	0.366523	0.310875	0.0138998	0.0064654	0.0437699	Au+	4.18e-90	COG0503@1|root,KOG1712@2759|Eukaryota,3A3HY@33154|Opisthokonta,3NUHG@4751|Fungi,3QK1A@4890|Ascomycota,20BCF@147545|Eurotiomycetes,3S3KD@5042|Eurotiales	4751|Fungi	F	Adenine phosphoribosyltransferase 1	2.4.2.7	K00759
qsublack_gene_83377	902352	551830	1.35835e+06	0.611547	1.50535	2.46154	0.075256	0.0185434	0.000324753	0.366523	0.186069	0.00350857	0.00130198	0.0208484	Au+	2.69e-143	KOG3126@1|root,KOG3126@2759|Eukaryota,38G4B@33154|Opisthokonta,3NXEA@4751|Fungi,3QKG0@4890|Ascomycota,20FSJ@147545|Eurotiomycetes,3S5JA@5042|Eurotiales	4751|Fungi	P	Outer mitochondrial membrane protein porin	-	K15040
qsublack_gene_83495	20456.7	13038.9	52994.9	0.63739	2.59059	4.06437	0.314999	0.00388621	0.000129901	0.689797	0.177283	0.00195787	0.000818214	0.0179228	Au+	0	COG0557@1|root,KOG2102@2759|Eukaryota,38DFE@33154|Opisthokonta,3NWBH@4751|Fungi,3QNBW@4890|Ascomycota,20BDJ@147545|Eurotiomycetes,3S6VT@5042|Eurotiales	4751|Fungi	J	Cell wall biogenesis protein phosphatase Ssd1	-	K18748
qsublack_gene_83831	14443.6	8094.52	35580.3	0.560422	2.4634	4.39561	0.0232306	0.0432571	0.000129901	0.208025	0.228284	0.00195787	0.000769075	0.0178661	Au+	6.51e-217	COG0240@1|root,KOG2711@2759|Eukaryota,38E7F@33154|Opisthokonta,3NVN7@4751|Fungi,3QKNN@4890|Ascomycota,20AD5@147545|Eurotiomycetes,3S3GT@5042|Eurotiales	4751|Fungi	C	Dehydrogenase	1.1.1.8	K00006
qsublack_gene_84097	90350.9	51124.2	195345	0.56584	2.16207	3.82099	0.528849	0.0114962	0.000205677	0.821246	0.17917	0.00258863	0.00207444	0.0249103	Au+	1.83e-160	COG0604@1|root,KOG1198@2759|Eukaryota,38G7C@33154|Opisthokonta,3NUXG@4751|Fungi,3QKDD@4890|Ascomycota,20DEE@147545|Eurotiomycetes,3S8BK@5042|Eurotiales	4751|Fungi	C	alcohol dehydrogenase	-	-
qsublack_gene_84260	45982.7	35664.4	129963	0.775604	2.82636	3.64407	0.578742	0.0185434	0.00105003	0.846164	0.186069	0.00838767	0.00654937	0.0442974	Au+	3.33e-188	COG0014@1|root,KOG4165@2759|Eukaryota,38GA1@33154|Opisthokonta,3NU0M@4751|Fungi,3QR7T@4890|Ascomycota,20EWE@147545|Eurotiomycetes,3S4IC@5042|Eurotiales	4751|Fungi	E	gamma-glutamyl phosphate reductase	1.2.1.41	K00147
qsublack_gene_85279	33641.7	17558	103230	0.521913	3.0685	5.87934	0.481251	0.0089307	0.00287947	0.791994	0.177283	0.0177096	0.00550235	0.0399056	Au+	5.18e-23	COG1358@1|root,KOG3406@2759|Eukaryota,3A22P@33154|Opisthokonta,3P1R7@4751|Fungi,3QUH4@4890|Ascomycota	4751|Fungi	J	Belongs to the eukaryotic ribosomal protein eS12 family	-	K02951
qsublack_gene_85640	61986.6	19478.8	147900	0.314242	2.38601	7.59288	0.00208924	0.0089307	1.08251e-05	0.109855	0.177283	0.000574593	6.26022e-05	0.0172216	Au+	3.99999998404542e-316	COG0016@1|root,KOG2784@2759|Eukaryota,38C6T@33154|Opisthokonta,3NTY7@4751|Fungi,3QK3B@4890|Ascomycota,20BNE@147545|Eurotiomycetes,3S3EV@5042|Eurotiales	4751|Fungi	J	Phenylalanyl-tRNA synthetase beta chain cytoplasmic	6.1.1.20	K01889
qsublack_gene_85814	12828.7	6001.22	33731	0.467796	2.62933	5.62068	0.0232306	0.0232306	4.33004e-05	0.208025	0.192276	0.00102315	0.000389626	0.0172216	Au+	6.92e-119	KOG2754@1|root,KOG2754@2759|Eukaryota,38ERA@33154|Opisthokonta,3NWIM@4751|Fungi,3QMEK@4890|Ascomycota,20BKR@147545|Eurotiomycetes,3S3N4@5042|Eurotiales	4751|Fungi	G	Essential subunit of the N-oligosaccharyl transferase (OST) complex which catalyzes the transfer of a high mannose oligosaccharide from a lipid-linked oligosaccharide donor to an asparagine residue within an Asn-X-Ser Thr consensus motif in nascent polypeptide chains	-	K12670
qsublack_gene_85907	218456	97167	414586	0.444789	1.8978	4.26673	0.247451	0.0630128	7.57756e-05	0.622878	0.262853	0.00140166	0.00258658	0.0271443	Au+	2.65e-206	COG5064@1|root,KOG0166@2759|Eukaryota,38CKN@33154|Opisthokonta,3NU5E@4751|Fungi,3QM4Y@4890|Ascomycota,20DH0@147545|Eurotiomycetes,3S7RR@5042|Eurotiales	4751|Fungi	U	Belongs to the importin alpha family	-	-
qsublack_gene_86123	158351	67919.3	310294	0.428916	1.95953	4.56856	0.0630128	0.0114962	1.08251e-05	0.339389	0.17917	0.000574593	0.000299068	0.0172216	Au+	2.93e-149	COG0126@1|root,KOG1367@2759|Eukaryota,38EF9@33154|Opisthokonta,3NVNN@4751|Fungi,3QPZ4@4890|Ascomycota,20CR1@147545|Eurotiomycetes,3S5H4@5042|Eurotiales	4751|Fungi	G	Belongs to the phosphoglycerate kinase family	2.7.2.3	K00927
qsublack_gene_86287	122840	41634.4	279065	0.338931	2.27177	6.70274	0.035463	0.0089307	4.33004e-05	0.255676	0.177283	0.00102315	0.000307283	0.0172216	Au+	1.42e-262	COG0166@1|root,KOG2446@2759|Eukaryota,38EWT@33154|Opisthokonta,3NW61@4751|Fungi,3QNDC@4890|Ascomycota,20BGU@147545|Eurotiomycetes,3S4G5@5042|Eurotiales	4751|Fungi	G	Belongs to the GPI family	5.3.1.9	K01810
qsublack_gene_86288	89959.5	27613.4	218163	0.306954	2.42513	7.90061	0.217563	0.0185434	0.000129901	0.588496	0.186069	0.00195787	0.00148512	0.021757	Au+	8.57e-99	COG0166@1|root,KOG2446@2759|Eukaryota,38EWT@33154|Opisthokonta,3NW61@4751|Fungi,3QNDC@4890|Ascomycota,20BGU@147545|Eurotiomycetes,3S4G5@5042|Eurotiales	4751|Fungi	G	Belongs to the GPI family	5.3.1.9	K01810
qsublack_gene_86343	7309.65	6117.38	22019.7	0.83689	3.01241	3.59953	0.165494	0.00388621	0.00388621	0.527292	0.177283	0.0222394	0.00313489	0.0298607	Au+	1.6e-115	KOG0756@1|root,KOG0756@2759|Eukaryota,38DTJ@33154|Opisthokonta,3NTZB@4751|Fungi,3QJS8@4890|Ascomycota,20E31@147545|Eurotiomycetes,3S59X@5042|Eurotiales	4751|Fungi	C	Belongs to the mitochondrial carrier (TC 2.A.29) family	-	-
qsublack_gene_86846	46355.5	17975.8	65238.8	0.387782	1.40736	3.62925	0.075256	0.352681	0.000725281	0.366523	0.637402	0.00633972	0.00790705	0.0495685	Au+	4.85e-112	COG0153@1|root,KOG0631@2759|Eukaryota,38ESX@33154|Opisthokonta,3NVCX@4751|Fungi,3QMRB@4890|Ascomycota,20F1C@147545|Eurotiomycetes,3S4A8@5042|Eurotiales	4751|Fungi	G	Galactokinase	2.7.1.6	K00849
qsublack_gene_87150	40573.8	11048.2	108879	0.272298	2.68348	9.85493	0.578742	0.00684146	1.08251e-05	0.846164	0.177283	0.000574593	0.000674233	0.0174514	Au+	4.65e-117	COG1310@1|root,KOG1555@2759|Eukaryota,38G6Q@33154|Opisthokonta,3NV6C@4751|Fungi,3QQWZ@4890|Ascomycota,20C9E@147545|Eurotiomycetes,3S5QI@5042|Eurotiales	4751|Fungi	O	Proteasome regulatory particle subunit (RpnK)	-	K03030
qsublack_gene_87228	40364.8	5698.13	109061	0.141166	2.70188	19.1397	0.0185434	0.14314	0.00519604	0.188391	0.394322	0.0276405	0.00675536	0.0450598	Au+	1.74e-89	COG3542@1|root,2RCWJ@2759|Eukaryota,3A25K@33154|Opisthokonta,3P2Y2@4751|Fungi,3QUSP@4890|Ascomycota,20H3E@147545|Eurotiomycetes,3S8T2@5042|Eurotiales	4751|Fungi	S	Cupin superfamily (DUF985)	-	K09705
qsublack_gene_87305	30873.4	9009.31	92845.3	0.291814	3.00729	10.3055	0.0892096	0.0114962	1.08251e-05	0.396036	0.17917	0.000574593	0.000353688	0.0172216	Au+	5.3e-18	COG5047@1|root,KOG1986@2759|Eukaryota,38B49@33154|Opisthokonta,3BDF4@33208|Metazoa,3CV03@33213|Bilateria,480CH@7711|Chordata,490WJ@7742|Vertebrata,3JEIR@40674|Mammalia	33208|Metazoa	U	COPII-coated vesicle budding	-	K14006
qsublack_gene_88013	26270.7	7509.94	63800	0.285867	2.42856	8.49541	0.0185434	0.14314	0.00150469	0.188391	0.394322	0.0106594	0.00350732	0.0316675	Au+	6.04e-256	COG1502@1|root,KOG1329@2759|Eukaryota,38G6H@33154|Opisthokonta,3NX5P@4751|Fungi,3QJSM@4890|Ascomycota,20BUK@147545|Eurotiomycetes,3S5V4@5042|Eurotiales	4751|Fungi	I	Phospholipase	3.1.4.4	K01115
qsublack_gene_89082	18821.1	9781.14	43501.6	0.51969	2.31132	4.4475	0.352681	0.00388621	0.000324753	0.716613	0.177283	0.00350857	0.00123012	0.0202693	Au+	0	COG0017@1|root,KOG0555@2759|Eukaryota,38ENC@33154|Opisthokonta,3NVRS@4751|Fungi,3QJSN@4890|Ascomycota,20G5V@147545|Eurotiomycetes,3S440@5042|Eurotiales	4751|Fungi	J	asparaginyl-tRNA synthetase	6.1.1.22	K01893
qsublack_gene_89709	181260	128537	430280	0.70913	2.37383	3.34752	0.911797	0.00388621	0.000324753	0.975879	0.177283	0.00350857	0.00174281	0.0230199	Au+	5.67e-178	KOG0759@1|root,KOG0759@2759|Eukaryota,38GP4@33154|Opisthokonta,3NWP1@4751|Fungi,3QMQN@4890|Ascomycota,20EW9@147545|Eurotiomycetes,3S4EM@5042|Eurotiales	4751|Fungi	C	Belongs to the mitochondrial carrier (TC 2.A.29) family	-	K15104
qsublack_gene_89777	59340.6	31077.3	104035	0.523711	1.75319	3.34762	0.314999	0.0892096	0.000129901	0.689797	0.310875	0.00195787	0.00431158	0.0348206	Au+	2.28e-87	COG0638@1|root,KOG0863@2759|Eukaryota,38BYM@33154|Opisthokonta,3NW5C@4751|Fungi,3QJCU@4890|Ascomycota,20DH9@147545|Eurotiomycetes,3S5ZB@5042|Eurotiales	4751|Fungi	O	Proteasome subunit alpha type	3.4.25.1	K02725
qsublack_gene_90403	19764.7	8155.84	59435	0.412647	3.00713	7.28742	0.165494	0.0114962	0.000725281	0.527292	0.17917	0.00633972	0.00212045	0.0249314	Au+	1.46e-149	KOG3211@1|root,KOG3211@2759|Eukaryota,38E44@33154|Opisthokonta,3NYWC@4751|Fungi,3QMB1@4890|Ascomycota,20BJ0@147545|Eurotiomycetes,3S8E6@5042|Eurotiales	4751|Fungi	S	Monosaccharide-P-dolichol utilization protein	-	K09660
qsublack_gene_90413	24936.2	8419.36	80549.7	0.337637	3.23024	9.56719	0.684211	0.00519604	0.00287947	0.894493	0.177283	0.0177096	0.00468879	0.0366546	Au+	6.2e-210	COG0484@1|root,KOG2220@1|root,KOG0715@2759|Eukaryota,KOG2220@2759|Eukaryota,38CYR@33154|Opisthokonta,3NUGR@4751|Fungi,3QPW9@4890|Ascomycota,20G4A@147545|Eurotiomycetes,3S3DM@5042|Eurotiales	4751|Fungi	U	Signal transduction protein	-	-
qsublack_gene_90426	29886.4	6635.17	67092.8	0.222013	2.24493	10.1117	0.0432571	0.123005	0.00287947	0.279663	0.367761	0.0177096	0.00677281	0.0450598	Au+	5.22e-64	KOG3028@1|root,KOG3028@2759|Eukaryota,3A0AJ@33154|Opisthokonta,3P1I9@4751|Fungi,3QPUF@4890|Ascomycota,20CGM@147545|Eurotiomycetes,3S32Q@5042|Eurotiales	4751|Fungi	U	Mitochondrial outer membrane protein (Sam35)	-	K17776
qsublack_gene_90525	39376.1	19614.5	54353.3	0.498131	1.38036	2.77108	0.0146896	0.279861	0.000129901	0.169987	0.564889	0.00195787	0.00148512	0.021757	Au+	5.21e-133	COG0461@1|root,KOG1377@2759|Eukaryota,38EAF@33154|Opisthokonta,3NW2K@4751|Fungi,3QQC5@4890|Ascomycota,20DRA@147545|Eurotiomycetes,3S63I@5042|Eurotiales	4751|Fungi	F	Belongs to the OMP decarboxylase family	2.4.2.10,4.1.1.23	K01591,K13421
qsublack_gene_90540	32596.4	6299.9	76769.8	0.19327	2.35516	12.1859	0.0114962	0.0630128	2.16502e-05	0.154231	0.262853	0.000724144	0.000366227	0.0172216	Au+	1.48e-38	COG0110@1|root,KOG4750@2759|Eukaryota,3A409@33154|Opisthokonta,3NZB6@4751|Fungi,3QMX3@4890|Ascomycota,20AZ0@147545|Eurotiomycetes,3S3Z9@5042|Eurotiales	4751|Fungi	E	Acetyltransferase, CysE LacA LpxA NodL family	-	-
qsublack_gene_90672	207266	91092.6	529374	0.439497	2.55408	5.81138	0.0892096	0.00684146	0.000129901	0.396036	0.177283	0.00195787	0.000612832	0.0172216	Au+	4.75e-17	COG1448@1|root,KOG1412@2759|Eukaryota,39W2P@33154|Opisthokonta,3NUCS@4751|Fungi,3QMJ0@4890|Ascomycota,20EDI@147545|Eurotiomycetes,3B2EB@33183|Onygenales	4751|Fungi	E	Aspartate aminotransferase	2.6.1.1	K14454
qsublack_gene_90765	39594.7	13809.8	53275.2	0.34878	1.34551	3.85777	0.0089307	0.190316	2.16502e-05	0.140682	0.459935	0.000724144	0.000549882	0.0172216	Au+	2.32e-211	COG0010@1|root,KOG2964@2759|Eukaryota,38BX2@33154|Opisthokonta,3NUEG@4751|Fungi,3QQPT@4890|Ascomycota,20AXM@147545|Eurotiomycetes,3S45R@5042|Eurotiales	4751|Fungi	G	Belongs to the arginase family	3.5.3.11	K01480
qsublack_gene_91720	82341.8	40467.4	159059	0.491457	1.93169	3.93054	0.0630128	0.0524259	7.57756e-05	0.339389	0.245851	0.00140166	0.00113262	0.0199913	Au+	1.01e-37	KOG1523@1|root,KOG1523@2759|Eukaryota,38FWT@33154|Opisthokonta,3NU7A@4751|Fungi,3QMDN@4890|Ascomycota,20C1A@147545|Eurotiomycetes,3S4N0@5042|Eurotiales	4751|Fungi	Z	Functions as component of the Arp2 3 complex which is involved in regulation of actin polymerization and together with an activating nucleation-promoting factor (NPF) mediates the formation of branched actin networks	-	K05757
qsublack_gene_91896	7144.15	5693.76	13945.6	0.796981	1.95203	2.44928	0.279861	0.00684146	1.08251e-05	0.655994	0.177283	0.000574593	0.000478353	0.0172216	Au+	0	KOG2023@1|root,KOG2023@2759|Eukaryota,38DR7@33154|Opisthokonta,3NWD3@4751|Fungi,3QKS8@4890|Ascomycota,20AK3@147545|Eurotiomycetes,3S7MJ@5042|Eurotiales	4751|Fungi	UY	Importin beta-2 subunit	-	K18752
qsublack_gene_92211	172269	25286.2	336179	0.146783	1.95147	13.2949	0.00684146	0.165494	0.00388621	0.131532	0.426096	0.0222394	0.00395449	0.0334488	Au+	2.82e-25	COG2303@1|root,KOG1238@2759|Eukaryota,38B8Z@33154|Opisthokonta,3NXIY@4751|Fungi,3QKFY@4890|Ascomycota,20EGJ@147545|Eurotiomycetes,3MV7H@451870|Chaetothyriomycetidae	4751|Fungi	E	alcohol oxidase	1.1.3.13	K17066
qsublack_gene_92719	127732	55995.3	335759	0.43838	2.62862	5.99621	0.684211	0.0288056	0.000487129	0.894493	0.203276	0.00477035	0.00532768	0.0393797	Au+	2.63e-235	KOG0362@1|root,KOG0362@2759|Eukaryota,38CBH@33154|Opisthokonta,3NUID@4751|Fungi,3QKFA@4890|Ascomycota,20BMU@147545|Eurotiomycetes,3S2U2@5042|Eurotiales	4751|Fungi	O	assists the folding of proteins upon ATP hydrolysis	-	K09500
qsublack_gene_92886	8091.26	7545.38	22717.2	0.932535	2.80763	3.01075	0.630529	0.00287947	0.000324753	0.869797	0.177283	0.00350857	0.0014623	0.021757	Au+	0	COG1501@1|root,KOG1066@2759|Eukaryota,3AJSB@33154|Opisthokonta,3NUB9@4751|Fungi,3QK5X@4890|Ascomycota,20EMG@147545|Eurotiomycetes,3S2MX@5042|Eurotiales	4751|Fungi	G	Belongs to the glycosyl hydrolase 31 family	3.2.1.84	K05546
qsublack_gene_92938	148741	60805.9	300456	0.408804	2.01999	4.94123	0.123005	0.075256	1.08251e-05	0.458299	0.283857	0.000574593	0.00112388	0.0199913	Au+	7.26e-27	COG1156@1|root,KOG1351@2759|Eukaryota,38F6K@33154|Opisthokonta,3NWY5@4751|Fungi,3QK93@4890|Ascomycota	4751|Fungi	C	vacuolar atp synthase subunit b	-	K02147
qsublack_gene_94095	272362	118512	406167	0.435127	1.49128	3.42722	0.00388621	0.0524259	4.33004e-05	0.114323	0.245851	0.00102315	0.000255508	0.0172216	Au+	8.42e-250	COG0443@1|root,KOG0101@2759|Eukaryota,38D3W@33154|Opisthokonta,3NUH7@4751|Fungi,3QN82@4890|Ascomycota,20DVE@147545|Eurotiomycetes,3S53Y@5042|Eurotiales	4751|Fungi	O	Belongs to the heat shock protein 70 family	-	K03283
qsublack_gene_94302	113059	57243.6	264136	0.506316	2.33626	4.61424	0.795936	0.0146896	2.16502e-05	0.941727	0.182685	0.000724144	0.00142873	0.0216676	Au+	1.28e-117	COG0183@1|root,KOG1389@2759|Eukaryota,38F89@33154|Opisthokonta,3NX2U@4751|Fungi,3QMVR@4890|Ascomycota,20AIK@147545|Eurotiomycetes,3S6CT@5042|Eurotiales	4751|Fungi	I	Belongs to the thiolase family	2.3.1.16	K07513
qsublack_gene_94306	89590.5	48670.5	162614	0.543255	1.81508	3.34111	0.352681	0.075256	2.16502e-05	0.716613	0.283857	0.000724144	0.00248837	0.0267655	Au+	4.57e-67	KOG0174@1|root,KOG0174@2759|Eukaryota,38EH1@33154|Opisthokonta,3NVT2@4751|Fungi,3QQD2@4890|Ascomycota,20AGH@147545|Eurotiomycetes,3S3SD@5042|Eurotiales	4751|Fungi	O	Proteasome subunit beta type	3.4.25.1	K02738
qsublack_gene_94594	1.14076e+06	478976	1.65166e+06	0.419874	1.44786	3.44832	0.0288056	0.075256	7.57756e-05	0.230602	0.283857	0.00140166	0.000916601	0.0185472	Au+	0	COG0480@1|root,KOG0469@2759|Eukaryota,38CUM@33154|Opisthokonta,3NW98@4751|Fungi,3QKTN@4890|Ascomycota,20D5X@147545|Eurotiomycetes,3S693@5042|Eurotiales	4751|Fungi	J	Elongation factor	-	K03234
qsublack_gene_94668	30391.5	8751.11	85090.7	0.287946	2.79981	9.72341	0.217563	0.0232306	0.00388621	0.588496	0.192276	0.0222394	0.00754816	0.0482463	Au+	4.8e-56	KOG3838@1|root,KOG3838@2759|Eukaryota,39JFJ@33154|Opisthokonta,3Q3SN@4751|Fungi,3RKV7@4890|Ascomycota,20ETE@147545|Eurotiomycetes,3SE4P@5042|Eurotiales	4751|Fungi	U	Legume-like lectin family	-	K10080
qsublack_gene_94757	31154.2	6644.79	87737.8	0.213287	2.81624	13.204	0.0630128	0.0232306	7.57756e-05	0.339389	0.192276	0.00140166	0.000757258	0.0178661	Au+	2.32e-27	COG0459@1|root,KOG0361@2759|Eukaryota,38FBW@33154|Opisthokonta,3NVKZ@4751|Fungi,3QK9R@4890|Ascomycota,1ZXDQ@147541|Dothideomycetes,4KB02@92860|Pleosporales	4751|Fungi	O	assists the folding of proteins upon ATP hydrolysis	-	K09499
qsublack_gene_94797	18478.8	11147.1	62245.1	0.603237	3.36846	5.58398	0.911797	0.00105003	0.000205677	0.975879	0.177283	0.00258863	0.000763143	0.0178661	Au+	3.12e-47	KOG2787@1|root,KOG2787@2759|Eukaryota,38E4R@33154|Opisthokonta,3Q374@4751|Fungi,3RK8I@4890|Ascomycota,20TJU@147545|Eurotiomycetes,3S771@5042|Eurotiales	4751|Fungi	V	Lanthionine synthetase C family protein	-	-
qsublack_gene_94798	17903.7	7458.76	46726	0.416604	2.60985	6.26458	0.123005	0.0232306	2.16502e-05	0.458299	0.192276	0.000724144	0.000717312	0.0178112	Au+	1.18e-115	KOG2787@1|root,KOG2787@2759|Eukaryota,38E4R@33154|Opisthokonta,3Q374@4751|Fungi,3RK8I@4890|Ascomycota,20TJU@147545|Eurotiomycetes,3S771@5042|Eurotiales	4751|Fungi	V	Lanthionine synthetase C family protein	-	-
qsublack_gene_94801	60339.7	26741.6	121758	0.443184	2.01787	4.55312	0.123005	0.035463	0.000129901	0.458299	0.214861	0.00195787	0.00156379	0.0221138	Au+	8.56e-183	COG0517@1|root,2QVK2@2759|Eukaryota,39AEJ@33154|Opisthokonta,3NVCH@4751|Fungi,3QJW0@4890|Ascomycota,20AGP@147545|Eurotiomycetes,3S67N@5042|Eurotiales	4751|Fungi	P	CBS and PB1 domain protein	-	-
qsublack_gene_94803	21105.1	6704.67	46366.1	0.317681	2.19692	6.9155	0.0288056	0.035463	0.000324753	0.230602	0.214861	0.00350857	0.00113262	0.0199913	Au+	9.34e-18	KOG2171@1|root,KOG2171@2759|Eukaryota,38EQR@33154|Opisthokonta,3NUCV@4751|Fungi,3QMKU@4890|Ascomycota,218P0@147550|Sordariomycetes,3THDK@5125|Hypocreales,1FRB3@110618|Nectriaceae	4751|Fungi	UY	to importin beta-3 subunit	-	K20222
qsublack_gene_94886	21118.8	8713.4	56982.6	0.41259	2.6982	6.53965	0.0630128	0.0089307	0.000487129	0.339389	0.177283	0.00477035	0.00104824	0.0194388	Au+	2.6e-53	COG0205@1|root,KOG2440@2759|Eukaryota,38C5Z@33154|Opisthokonta,3NUSX@4751|Fungi,3QMRD@4890|Ascomycota,20F36@147545|Eurotiomycetes,3S3XT@5042|Eurotiales	4751|Fungi	F	Catalyzes the phosphorylation of D-fructose 6-phosphate to fructose 1,6-bisphosphate by ATP, the first committing step of glycolysis	2.7.1.11	K00850
qsublack_gene_94899	11445.1	8048.37	52804.7	0.703213	4.61372	6.56092	0.217563	0.00150469	7.57756e-05	0.588496	0.177283	0.00140166	0.000383145	0.0172216	Au+	1.02e-138	28IQU@1|root,2QR24@2759|Eukaryota,38J3U@33154|Opisthokonta,3NUVQ@4751|Fungi,3QNH4@4890|Ascomycota,20BAB@147545|Eurotiomycetes,3S6ES@5042|Eurotiales	4751|Fungi	F	IMP-specific 5'-nucleotidase involved in IMP (inositol monophosphate) degradation	3.1.3.99	K18550
qsublack_gene_95956	29490.6	12118.7	116651	0.410933	3.95553	9.62574	0.352681	0.0185434	0.00150469	0.716613	0.186069	0.0106594	0.00512539	0.0385457	Au+	2.06e-245	COG2046@1|root,KOG0636@2759|Eukaryota,38EMA@33154|Opisthokonta,3NUAT@4751|Fungi,3QJXC@4890|Ascomycota,20FXD@147545|Eurotiomycetes,3S518@5042|Eurotiales	4751|Fungi	H	Catalyzes the first intracellular reaction of sulfate assimilation, forming adenosine-5'-phosphosulfate (APS) from inorganic sulfate and ATP. Plays an important role in sulfate activation as a component of the biosynthesis pathway of sulfur- containing amino acids	2.7.7.4	K00958
qsublack_gene_96141	29201.6	5597.7	66615.4	0.191691	2.28122	11.9005	0.14314	0.123005	0.000324753	0.497156	0.367761	0.00350857	0.00465864	0.0366303	Au+	2.82e-180	COG3001@1|root,KOG3021@2759|Eukaryota,38F6U@33154|Opisthokonta,3NXP0@4751|Fungi,3QQE3@4890|Ascomycota,20AHD@147545|Eurotiomycetes,3S713@5042|Eurotiales	4751|Fungi	G	Fructosamine kinase	2.7.1.172	K15523
qsublack_gene_96406	45115.5	16527.7	107801	0.366342	2.38945	6.52246	0.123005	0.0288056	0.000205677	0.458299	0.203276	0.00258863	0.00168748	0.0226804	Au+	1.49e-70	COG3193@1|root,2SMVS@2759|Eukaryota,3A486@33154|Opisthokonta,3P441@4751|Fungi,3QWK7@4890|Ascomycota,20NI7@147545|Eurotiomycetes,3MX7B@451870|Chaetothyriomycetidae	4751|Fungi	S	Haem-degrading	-	-
qsublack_gene_96678	72673.7	26075.8	245939	0.358806	3.38415	9.4317	0.165494	0.0146896	0.00150469	0.527292	0.182685	0.0106594	0.00334812	0.030618	Au+	2.55e-12	KOG1110@1|root,KOG1110@2759|Eukaryota,3A5SG@33154|Opisthokonta,3P59A@4751|Fungi,3QWC5@4890|Ascomycota,20HVT@147545|Eurotiomycetes,3S8X0@5042|Eurotiales	4751|Fungi	S	Belongs to the cytochrome b5 family	-	-
qsublack_gene_96713	30001.2	9852.13	79757.3	0.328391	2.65847	8.09543	0.435872	0.0185434	0.000205677	0.762178	0.186069	0.00258863	0.00245964	0.0266128	Au+	0	COG0443@1|root,KOG0104@2759|Eukaryota,38CWK@33154|Opisthokonta,3NURM@4751|Fungi,3QK9S@4890|Ascomycota,20DGN@147545|Eurotiomycetes,3S7FJ@5042|Eurotiales	4751|Fungi	O	Belongs to the heat shock protein 70 family	-	K09486
qsublack_gene_96732	37434.7	7918.29	139182	0.211523	3.71801	17.5773	0.0089307	0.035463	0.00684146	0.140682	0.214861	0.0343009	0.00349828	0.0316675	Au+	2.68e-54	COG5354@1|root,KOG2314@2759|Eukaryota,38C0Z@33154|Opisthokonta,3NXCR@4751|Fungi,3QM53@4890|Ascomycota,20CYU@147545|Eurotiomycetes,3B05C@33183|Onygenales	4751|Fungi	J	Component of the eukaryotic translation initiation factor 3 (eIF-3) complex, which is involved in protein synthesis and, together with other initiation factors, stimulates binding of mRNA and methionyl-tRNAi to the 40S ribosome	-	K03253
qsublack_gene_96987	41293	23170.5	90647.8	0.561123	2.19523	3.91221	0.481251	0.0185434	1.08251e-05	0.791994	0.186069	0.000574593	0.0010701	0.0197444	Au+	5.44e-231	COG0031@1|root,KOG1481@2759|Eukaryota,38EU0@33154|Opisthokonta,3NW4Y@4751|Fungi,3QNHY@4890|Ascomycota,20AS3@147545|Eurotiomycetes,3S6JH@5042|Eurotiales	4751|Fungi	E	Cysteine synthase	2.5.1.47	K01738
qsublack_gene_97132	63372	21179	137224	0.334202	2.16537	6.47923	0.123005	0.0288056	0.000129901	0.458299	0.203276	0.00195787	0.00140678	0.0214234	Au+	8.17e-18	COG5274@1|root,KOG0537@2759|Eukaryota,3A87A@33154|Opisthokonta,3P7A2@4751|Fungi,3QWG9@4890|Ascomycota,20HVX@147545|Eurotiomycetes,3S97C@5042|Eurotiales	4751|Fungi	C	Cytochrome b5	-	-
qsublack_gene_97202	52945.2	15835.5	169956	0.299091	3.21003	10.7326	0.0185434	0.0232306	7.57756e-05	0.188391	0.192276	0.00140166	0.000430326	0.0172216	Au+	1.45e-126	COG0596@1|root,2SKXK@2759|Eukaryota,39ZYT@33154|Opisthokonta,3P28X@4751|Fungi,3QP6Q@4890|Ascomycota,20I7K@147545|Eurotiomycetes,3SCTC@5042|Eurotiales	4751|Fungi	S	Serine aminopeptidase, S33	-	-
qsublack_gene_97224	58639.4	22820.2	179623	0.389161	3.06319	7.87126	0.795936	0.0114962	0.00105003	0.941727	0.17917	0.00838767	0.00459891	0.0364578	Au+	6.03e-203	COG0508@1|root,KOG0557@2759|Eukaryota,38BJW@33154|Opisthokonta,3NVAH@4751|Fungi,3QJQR@4890|Ascomycota,20FNP@147545|Eurotiomycetes,3S86R@5042|Eurotiales	4751|Fungi	I	The pyruvate dehydrogenase complex catalyzes the overall conversion of pyruvate to acetyl-CoA and CO(2)	2.3.1.12	K00627
qsublack_gene_97415	30495.5	14515.6	62824.9	0.475991	2.06014	4.3281	0.279861	0.0432571	0.00105003	0.655994	0.228284	0.00838767	0.00610068	0.0422777	Au+	2.76e-237	KOG0276@1|root,KOG0276@2759|Eukaryota,38EBC@33154|Opisthokonta,3NWHK@4751|Fungi,3QK5Z@4890|Ascomycota,20E6E@147545|Eurotiomycetes,3S7BY@5042|Eurotiales	4751|Fungi	U	The coatomer is a cytosolic protein complex that binds to dilysine motifs and reversibly associates with Golgi non- clathrin-coated vesicles, which further mediate biosynthetic protein transport from the ER, via the Golgi up to the trans Golgi network. Coatomer complex is required for budding from Golgi membranes, and is essential for the retrograde Golgi-to-ER transport of dilysine-tagged protei…	-	K17302
qsublack_gene_97493	9047.44	6513.63	14825.7	0.719943	1.63866	2.2761	0.314999	0.0146896	0.000725281	0.689797	0.182685	0.00633972	0.00313489	0.0298607	Au+	5.03e-191	COG0018@1|root,KOG1195@2759|Eukaryota,38DX4@33154|Opisthokonta,3NVK0@4751|Fungi,3QKP2@4890|Ascomycota,20CVP@147545|Eurotiomycetes,3S37W@5042|Eurotiales	4751|Fungi	J	Belongs to the class-I aminoacyl-tRNA synthetase family	6.1.1.19	K01887
qsublack_gene_97876	95770.9	32840.4	205315	0.342906	2.14381	6.25189	0.0232306	0.0146896	1.08251e-05	0.208025	0.182685	0.000574593	0.000209733	0.0172216	Au+	2.32e-16	COG0624@1|root,KOG2276@2759|Eukaryota,38D4S@33154|Opisthokonta,3BE18@33208|Metazoa,3CXPG@33213|Bilateria,485KK@7711|Chordata,48X3M@7742|Vertebrata,49YEH@7898|Actinopterygii	33208|Metazoa	E	CNDP dipeptidase 2 (metallopeptidase M20 family)	3.4.13.18	K08660
qsublack_gene_98783	50846.4	12370.3	94988.1	0.243288	1.86814	7.6787	0.0232306	0.0892096	2.16502e-05	0.208025	0.310875	0.000724144	0.000609677	0.0172216	Au+	2.2e-48	COG5019@1|root,KOG1547@2759|Eukaryota,38CPR@33154|Opisthokonta,3NUHB@4751|Fungi,3QJJP@4890|Ascomycota,20VU7@147548|Leotiomycetes	4751|Fungi	DTZ	Belongs to the TRAFAC class TrmE-Era-EngA-EngB-Septin- like GTPase superfamily. Septin GTPase family	-	K16938
qsublack_gene_99510	30505.1	7580.62	111272	0.248503	3.64764	14.6784	0.035463	0.0146896	0.000324753	0.255676	0.182685	0.00350857	0.000840688	0.0179939	Au+	0	COG0017@1|root,KOG0555@2759|Eukaryota,38ENC@33154|Opisthokonta,3NVRS@4751|Fungi,3QJSN@4890|Ascomycota,20G5V@147545|Eurotiomycetes,3S440@5042|Eurotiales	4751|Fungi	J	asparaginyl-tRNA synthetase	6.1.1.22	K01893
qsublack_gene_99953	154746	56925.7	352916	0.367866	2.28062	6.19959	0.035463	0.0146896	0.00150469	0.255676	0.182685	0.0106594	0.00176772	0.0232006	Au+	6.2e-71	COG0071@1|root,KOG0710@2759|Eukaryota,3AA65@33154|Opisthokonta,3P7MG@4751|Fungi,3QXAB@4890|Ascomycota,20NAZ@147545|Eurotiomycetes,3SFJN@5042|Eurotiales	4751|Fungi	O	Belongs to the small heat shock protein (HSP20) family	-	K13993
qsublack_gene_100002	16973.4	7859.37	43719	0.46304	2.57574	5.56266	0.578742	0.00519604	4.33004e-05	0.846164	0.177283	0.00102315	0.000840688	0.0179939	Au+	5.02e-88	COG1222@1|root,KOG0652@2759|Eukaryota,38BDY@33154|Opisthokonta,3NV1G@4751|Fungi,3QNKJ@4890|Ascomycota,20DAU@147545|Eurotiomycetes,3MRK6@451870|Chaetothyriomycetidae	4751|Fungi	O	Belongs to the AAA ATPase family	-	K03065
qsublack_gene_100415	16948.4	7703.65	44717.6	0.454534	2.63845	5.80473	0.393048	0.0146896	0.00150469	0.732217	0.182685	0.0106594	0.00476196	0.0369506	Au+	1.54e-63	KOG0289@1|root,KOG0289@2759|Eukaryota,38CRU@33154|Opisthokonta,3NV8G@4751|Fungi,3QMK7@4890|Ascomycota,20DZB@147545|Eurotiomycetes,3S3DW@5042|Eurotiales	4751|Fungi	S	Cell cycle control protein (Cwf8)	2.3.2.27	K10599
qsublack_gene_100939	22170.3	11121.9	57301.3	0.50166	2.5846	5.15209	0.795936	0.0432571	0.000205677	0.941727	0.228284	0.00258863	0.00532768	0.0393797	Au+	8.97e-146	COG0325@1|root,KOG3157@2759|Eukaryota,39S7M@33154|Opisthokonta,3NUSW@4751|Fungi,3QS2G@4890|Ascomycota,20D4R@147545|Eurotiomycetes,3S7IT@5042|Eurotiales	4751|Fungi	E	Pyridoxal 5'-phosphate (PLP)-binding protein, which may be involved in intracellular homeostatic regulation of pyridoxal 5'-phosphate (PLP), the active form of vitamin B6	-	K06997
qsublack_gene_101420	62246.7	23131.2	113411	0.371606	1.82195	4.90292	0.0432571	0.075256	0.000324753	0.279663	0.283857	0.00350857	0.00194734	0.0242178	Au+	7.36e-172	COG1362@1|root,KOG2596@2759|Eukaryota,38CES@33154|Opisthokonta,3NWB8@4751|Fungi,3QKN2@4890|Ascomycota,20EQI@147545|Eurotiomycetes,3S6M1@5042|Eurotiales	4751|Fungi	E	Belongs to the peptidase M18 family	3.4.11.21	K01267
qsublack_gene_101662	52728	15586.6	148330	0.295604	2.81313	9.51655	0.165494	0.00684146	0.000129901	0.527292	0.177283	0.00195787	0.000805642	0.0179228	Au+	3.24e-10	COG0446@1|root,KOG1336@2759|Eukaryota,38CNG@33154|Opisthokonta,3BH1J@33208|Metazoa,3CTAN@33213|Bilateria,4857Q@7711|Chordata,493HP@7742|Vertebrata,3JEW6@40674|Mammalia,359G4@314146|Euarchontoglires	33208|Metazoa	S	Apoptosis-inducing factor	-	-
qsublack_gene_101782	106260	47921	165401	0.45098	1.55658	3.45154	0.0146896	0.105122	0.000129901	0.169987	0.338025	0.00195787	0.000936929	0.0187756	Au+	2.21e-130	COG1310@1|root,KOG1555@2759|Eukaryota,38G6Q@33154|Opisthokonta,3NV6C@4751|Fungi,3QQWZ@4890|Ascomycota,20C9E@147545|Eurotiomycetes,3S5QI@5042|Eurotiales	4751|Fungi	O	Proteasome regulatory particle subunit (RpnK)	-	K03030
qsublack_gene_102174	37985	17132.3	94380.7	0.451029	2.48469	5.50892	0.393048	0.00519604	2.16502e-05	0.732217	0.177283	0.000724144	0.000591086	0.0172216	Au+	8.68e-201	COG0526@1|root,KOG0191@2759|Eukaryota,39QMU@33154|Opisthokonta,3Q6R0@4751|Fungi,3RPJG@4890|Ascomycota,20UZ7@147545|Eurotiomycetes	4751|Fungi	O	Temperature dependent protein affecting M2 dsRNA replication	-	-
qsublack_gene_102466	1.19157e+06	757584	2.66787e+06	0.635788	2.23896	3.52155	0.352681	0.0146896	0.000725281	0.716613	0.182685	0.00633972	0.00328819	0.0305272	Au+	5.7e-235	COG0246@1|root,2QVPN@2759|Eukaryota,38GSA@33154|Opisthokonta,3P018@4751|Fungi,3QQNX@4890|Ascomycota,20E7J@147545|Eurotiomycetes,3S4H2@5042|Eurotiales	4751|Fungi	E	Catalyzes the NAD(H)-dependent interconversion of D- fructose 6-phosphate and D-mannitol 1-phosphate in the mannitol metabolic pathway	1.1.1.17	K00009
qsublack_gene_103289	14630.2	5815.27	29179.7	0.397485	1.99449	5.01778	0.0524259	0.0524259	0.000324753	0.309444	0.245851	0.00350857	0.0017953	0.0232754	Au+	1.52e-211	COG0119@1|root,KOG2367@2759|Eukaryota,38E9U@33154|Opisthokonta,3NUMJ@4751|Fungi,3QM1I@4890|Ascomycota,20EH7@147545|Eurotiomycetes,3S748@5042|Eurotiales	4751|Fungi	H	Belongs to the alpha-IPM synthase homocitrate synthase family	2.3.3.14	K01655
qsublack_gene_103474	151690	72033.3	277455	0.474873	1.82909	3.85176	0.217563	0.0630128	7.57756e-05	0.588496	0.262853	0.00140166	0.00240938	0.0262629	Au+	1.7e-133	COG4284@1|root,KOG2388@2759|Eukaryota,38G4Q@33154|Opisthokonta,3NVWY@4751|Fungi,3QMTW@4890|Ascomycota,20BYD@147545|Eurotiomycetes,3S6PW@5042|Eurotiales	4751|Fungi	M	UDP-N-acetylglucosamine pyrophosphorylase	2.7.7.23,2.7.7.83	K00972
qsublack_gene_103693	170953	78366.2	291097	0.458407	1.70278	3.71457	0.0524259	0.0892096	7.57756e-05	0.309444	0.310875	0.00140166	0.00135336	0.0211662	Au+	5.24e-258	COG0166@1|root,KOG2446@2759|Eukaryota,38EWT@33154|Opisthokonta,3NW61@4751|Fungi,3QNDC@4890|Ascomycota,20BGU@147545|Eurotiomycetes,3S4G5@5042|Eurotiales	4751|Fungi	G	Belongs to the GPI family	5.3.1.9	K01810
qsublack_gene_104534	11855.3	6546.57	23933.6	0.552204	2.0188	3.6559	0.279861	0.0232306	0.00105003	0.655994	0.192276	0.00838767	0.00442429	0.0353413	Au+	9.49e-176	KOG2397@1|root,KOG2397@2759|Eukaryota,38EUH@33154|Opisthokonta,3NY9J@4751|Fungi,3QKD0@4890|Ascomycota,20DAW@147545|Eurotiomycetes,3S3EK@5042|Eurotiales	4751|Fungi	T	Protein kinase C substrate	-	K08288
qsublack_gene_104849	36528.4	15490	93199.3	0.424054	2.55142	6.01673	0.393048	0.00287947	2.16502e-05	0.732217	0.177283	0.000724144	0.000443861	0.0172216	Au+	7.27999999999999e-310	COG4770@1|root,KOG0238@2759|Eukaryota,38B7N@33154|Opisthokonta,3NVGW@4751|Fungi,3QJHP@4890|Ascomycota,20CCP@147545|Eurotiomycetes,3S61M@5042|Eurotiales	4751|Fungi	EI	3-methylcrotonyl-CoA carboxylase subunit alpha (MccA)	6.4.1.4	K01968
qsublack_gene_104971	35436.9	12256.1	42094	0.345856	1.18786	3.43455	0.00388621	0.684211	0.000205677	0.114323	0.856286	0.00258863	0.0013121	0.0208484	Au+	3.53e-153	COG1362@1|root,KOG2596@2759|Eukaryota,38CES@33154|Opisthokonta,3NWB8@4751|Fungi,3QKN2@4890|Ascomycota,20EQI@147545|Eurotiomycetes,3S6M1@5042|Eurotiales	4751|Fungi	E	Belongs to the peptidase M18 family	3.4.11.21	K01267
qsublack_gene_105154	29004.1	11289.1	90101.5	0.389224	3.10651	7.98129	0.190316	0.0288056	0.00150469	0.555404	0.203276	0.0106594	0.00489275	0.0375282	Au+	8.32e-87	KOG3313@1|root,KOG3313@2759|Eukaryota,38DQ2@33154|Opisthokonta,3NX0J@4751|Fungi,3QNC4@4890|Ascomycota,20BEJ@147545|Eurotiomycetes,3S5YV@5042|Eurotiales	4751|Fungi	O	Binds specifically to cytosolic chaperonin (c-CPN) and transfers target proteins to it. Binds to nascent polypeptide chain and promotes folding in an environment in which there are many competing pathways for nonnative proteins	-	-
qsublack_gene_105555	27898.8	7747.29	81113.4	0.277693	2.90742	10.4699	0.190316	0.0630128	0.000725281	0.555404	0.262853	0.00633972	0.00524583	0.0389713	Au+	6.44e-12	COG2513@1|root,KOG1260@2759|Eukaryota,37M2S@33090|Viridiplantae,3GBJH@35493|Streptophyta,3HS3D@3699|Brassicales	35493|Streptophyta	C	Belongs to the isocitrate lyase PEP mutase superfamily. Isocitrate lyase family	4.1.3.1	K01637
qsublack_gene_105556	163462	70483.5	233767	0.431192	1.4301	3.31661	0.000725281	0.190316	0.000324753	0.102167	0.459935	0.00350857	0.000488962	0.0172216	Au+	4.26e-56	COG2513@1|root,KOG1260@2759|Eukaryota,38CWA@33154|Opisthokonta,3NUMX@4751|Fungi,3QKES@4890|Ascomycota,213K1@147550|Sordariomycetes,3TGF4@5125|Hypocreales,3G4YA@34397|Clavicipitaceae	4751|Fungi	C	Isocitrate lyase family	4.1.3.1	K01637
qsublack_gene_105560	46720.7	27180.8	159152	0.581772	3.40646	5.85531	0.911797	0.00388621	0.00105003	0.975879	0.177283	0.00838767	0.00277323	0.0280436	Au+	1.38e-16	COG1012@1|root,KOG2456@2759|Eukaryota,38CW8@33154|Opisthokonta,3NV38@4751|Fungi,3QKJV@4890|Ascomycota	4751|Fungi	C	Belongs to the aldehyde dehydrogenase family	1.2.1.3,1.2.1.5,1.2.1.82	K00128,K00129,K17819
qsublack_gene_105561	25513.6	7737.77	95803	0.30328	3.75498	12.3812	0.279861	0.00519604	0.000324753	0.655994	0.177283	0.00350857	0.00128197	0.0206838	Au+	5.93e-155	COG1012@1|root,KOG2456@2759|Eukaryota,38CW8@33154|Opisthokonta,3NV38@4751|Fungi,3QKJV@4890|Ascomycota,20EN9@147545|Eurotiomycetes,3S5R1@5042|Eurotiales	4751|Fungi	C	Belongs to the aldehyde dehydrogenase family	1.2.1.3,1.2.1.5,1.2.1.82	K00128,K00129,K17819
qsublack_gene_105562	11627.1	6190.03	72954	0.532381	6.27449	11.7857	0.314999	0.00287947	0.000205677	0.689797	0.177283	0.00258863	0.000857118	0.0180413	Au+	2.35e-53	COG1012@1|root,KOG2456@2759|Eukaryota,38CW8@33154|Opisthokonta,3NV38@4751|Fungi,3QKJV@4890|Ascomycota,20EN9@147545|Eurotiomycetes,3S5R1@5042|Eurotiales	4751|Fungi	C	Belongs to the aldehyde dehydrogenase family	1.2.1.3,1.2.1.5,1.2.1.82	K00128,K00129,K17819
qsublack_gene_105615	15783.7	8920.73	35274.6	0.565186	2.23487	3.95422	0.481251	0.00519604	4.33004e-05	0.791994	0.177283	0.00102315	0.000778058	0.0178661	Au+	1.45e-76	KOG4056@1|root,KOG4056@2759|Eukaryota,3A1HC@33154|Opisthokonta,3P2QG@4751|Fungi,3QUZS@4890|Ascomycota,20GHJ@147545|Eurotiomycetes,3S7DR@5042|Eurotiales	4751|Fungi	U	Mitochondrial import receptor subunit (Tom20)	-	K17770
qsublack_gene_105784	364799	224683	626247	0.61591	1.71669	2.78724	0.105122	0.0630128	2.16502e-05	0.428982	0.262853	0.000724144	0.00112388	0.0199913	Au+	3.67e-50	COG1028@1|root,KOG1205@2759|Eukaryota,38DQR@33154|Opisthokonta,3NW2S@4751|Fungi,3QN6R@4890|Ascomycota,20AU1@147545|Eurotiomycetes,3AZ7K@33183|Onygenales	4751|Fungi	Q	Belongs to the short-chain dehydrogenases reductases (SDR) family	1.1.1.381	K16066
qsublack_gene_105812	30014.3	11033.9	65849.2	0.367622	2.19393	5.96788	0.0089307	0.00684146	1.08251e-05	0.140682	0.177283	0.000574593	9.96154e-05	0.0172216	Au+	1.4e-93	KOG1560@1|root,KOG1560@2759|Eukaryota,3906S@33154|Opisthokonta,3NW8Q@4751|Fungi,3QMTE@4890|Ascomycota,20CNT@147545|Eurotiomycetes,3S64U@5042|Eurotiales	4751|Fungi	J	component of the eukaryotic translation initiation factor 3 (eIF-3) complex, which is involved in protein synthesis of a specialized repertoire of mRNAs and, together with other initiation factors, stimulates binding of mRNA and methionyl-tRNAi to the 40S ribosome. The eIF-3 complex specifically targets and initiates translation of a subset of mRNAs involved in cell proliferation	-	K03247
qsublack_gene_105937	302870	133598	733885	0.441108	2.4231	5.49322	0.247451	0.0146896	0.000324753	0.622878	0.182685	0.00350857	0.00200083	0.0244676	Au+	9.51e-85	COG0126@1|root,KOG1367@2759|Eukaryota,38EF9@33154|Opisthokonta,3NVNN@4751|Fungi,3QPZ4@4890|Ascomycota,20CR1@147545|Eurotiomycetes,3S5H4@5042|Eurotiales	4751|Fungi	G	Belongs to the phosphoglycerate kinase family	2.7.2.3	K00927
qsublack_gene_105980	235460	151061	392149	0.641557	1.66546	2.59596	0.105122	0.0432571	0.000324753	0.428982	0.228284	0.00350857	0.00229113	0.025899	Au+	4.76e-55	COG1960@1|root,KOG0139@2759|Eukaryota,38H6J@33154|Opisthokonta,3NWK6@4751|Fungi,3QQB9@4890|Ascomycota,20DZF@147545|Eurotiomycetes,3S627@5042|Eurotiales	4751|Fungi	E	acyl-CoA dehydrogenase	-	-
qsublack_gene_106032	52662.6	26899.1	125619	0.510781	2.38536	4.67003	0.630529	0.0146896	7.57756e-05	0.869797	0.182685	0.00140166	0.00181627	0.0233817	Au+	1.57e-20	COG0436@1|root,KOG0257@2759|Eukaryota,38BZ0@33154|Opisthokonta,3NVUU@4751|Fungi,3QPSJ@4890|Ascomycota,20DM3@147545|Eurotiomycetes,3B2IK@33183|Onygenales,3FVY3@34384|Arthrodermataceae	4751|Fungi	E	Aminotransferase class I and II	2.6.1.7	K14264
qsublack_gene_106136	39135.9	10059.9	99758.1	0.25705	2.54902	9.91642	0.739364	0.0185434	1.08251e-05	0.920279	0.186069	0.000574593	0.0017028	0.0228025	Au+	6.25e-39	COG0627@1|root,KOG3101@2759|Eukaryota,38RFR@33154|Opisthokonta,3NW46@4751|Fungi,3QKQ7@4890|Ascomycota,20BTF@147545|Eurotiomycetes,3S7QD@5042|Eurotiales	4751|Fungi	S	Serine hydrolase involved in the detoxification of formaldehyde	3.1.2.12	K01070
qsublack_gene_106774	79583.3	39507.4	116995	0.496428	1.47009	2.96133	0.0524259	0.105122	0.000205677	0.309444	0.338025	0.00258863	0.00211498	0.0249314	Au+	1.74e-38	COG5309@1|root,2QQE6@2759|Eukaryota,38HGU@33154|Opisthokonta,3NW21@4751|Fungi,3QNSF@4890|Ascomycota,20AGW@147545|Eurotiomycetes,3B1WW@33183|Onygenales,3FXZN@34384|Arthrodermataceae	4751|Fungi	G	Glycosyl hydrolases family 17	3.2.1.58	K01210
qsublack_gene_106931	11750	8093.13	19176.5	0.688778	1.63204	2.36948	0.435872	0.0630128	0.000324753	0.762178	0.262853	0.00350857	0.00580128	0.0410573	Au+	9.35e-146	2D0KB@1|root,2SEIT@2759|Eukaryota,3A9UE@33154|Opisthokonta,3P89X@4751|Fungi,3QYHN@4890|Ascomycota,20D6Q@147545|Eurotiomycetes,3S4AC@5042|Eurotiales	4751|Fungi	-	-	-	-
qsublack_gene_106979	113749	46338.2	259950	0.407371	2.28529	5.60985	0.105122	0.0288056	0.000205677	0.428982	0.203276	0.00258863	0.00156379	0.0221138	Au+	7.85e-68	COG1012@1|root,KOG2450@2759|Eukaryota,39RV1@33154|Opisthokonta,3NUPB@4751|Fungi,3QQVQ@4890|Ascomycota,20E2B@147545|Eurotiomycetes,3S6XE@5042|Eurotiales	4751|Fungi	C	Belongs to the aldehyde dehydrogenase family	-	-
qsublack_gene_107033	86166.3	48327.9	232023	0.560868	2.69274	4.80101	0.853428	0.0146896	0.000725281	0.959386	0.182685	0.00633972	0.0049691	0.0378758	Au+	3.47e-253	COG0459@1|root,KOG0359@2759|Eukaryota,38EFP@33154|Opisthokonta,3NVVE@4751|Fungi,3QNZU@4890|Ascomycota,20EHA@147545|Eurotiomycetes,3S70G@5042|Eurotiales	4751|Fungi	O	assists the folding of proteins upon ATP hydrolysis	-	K09498
qsublack_gene_107108	56024.1	24601.4	137410	0.439122	2.4527	5.58547	0.435872	0.0146896	0.00105003	0.762178	0.182685	0.00838767	0.00422348	0.0345279	Au+	4.19e-235	COG1070@1|root,KOG2531@2759|Eukaryota,38EEF@33154|Opisthokonta,3NUTT@4751|Fungi,3QK5R@4890|Ascomycota,20CEN@147545|Eurotiomycetes,3S4QV@5042|Eurotiales	4751|Fungi	G	Highly specific D-xylulose kinase which participates in the catabolism of xylose. Xylose is a major component of hemicelluloses such as xylan. Most fungi utilize D-xylose via three enzymatic reactions, xylose reductase (XR), xylitol dehydrogenase (XDH), and xylulokinase, to form xylulose 5- phosphate, which enters pentose phosphate pathway	2.7.1.17	K00854
qsublack_gene_108186	35099.2	7392.79	80255.1	0.210626	2.28652	10.8559	0.481251	0.0185434	4.33004e-05	0.791994	0.186069	0.00102315	0.00153183	0.0220445	Au+	0	COG0480@1|root,KOG0465@2759|Eukaryota,38GUI@33154|Opisthokonta,3NV2U@4751|Fungi,3QNG6@4890|Ascomycota,20F5T@147545|Eurotiomycetes,3S49I@5042|Eurotiales	4751|Fungi	J	Mitochondrial GTPase that catalyzes the GTP-dependent ribosomal translocation step during translation elongation. During this step, the ribosome changes from the pre-translocational (PRE) to the post-translocational (POST) state as the newly formed A- site-bound peptidyl-tRNA and P-site-bound deacylated tRNA move to the P and E sites, respectively. Catalyzes the coordinated movement of the two tR…	-	K02355
qsublack_gene_108720	16753.9	6306.29	48465.1	0.376408	2.89277	7.6852	0.0114962	0.0892096	0.00208924	0.154231	0.310875	0.0138998	0.00276966	0.0280436	Au+	1.16e-217	COG0009@1|root,KOG3051@2759|Eukaryota,38DGJ@33154|Opisthokonta,3NU6F@4751|Fungi,3QQT9@4890|Ascomycota,20CA7@147545|Eurotiomycetes,3S3GZ@5042|Eurotiales	4751|Fungi	H	required for the formation of a threonylcarbamoyl group on adenosine at position 37 (t(6)A37) in tRNAs that read codons beginning with adenine	2.7.7.87	K07566
qsublack_gene_108737	192801	69275.9	310156	0.359313	1.60869	4.47712	0.00287947	0.035463	1.08251e-05	0.109855	0.214861	0.000574593	0.000125174	0.0172216	Au+	6.53e-18	COG1911@1|root,KOG2988@2759|Eukaryota,3A3EW@33154|Opisthokonta,3P3X3@4751|Fungi,3QWQH@4890|Ascomycota,20I2K@147545|Eurotiomycetes,3S99R@5042|Eurotiales	4751|Fungi	J	60S ribosomal protein	-	K02908
qsublack_gene_108826	221015	126211	467258	0.571053	2.11415	3.7022	0.314999	0.0185434	7.57756e-05	0.689797	0.186069	0.00140166	0.00148512	0.021757	Au+	3.36e-44	KOG0118@1|root,KOG0118@2759|Eukaryota,38I3K@33154|Opisthokonta,3NZQ5@4751|Fungi,3QMAU@4890|Ascomycota,20BRV@147545|Eurotiomycetes,3S2Z9@5042|Eurotiales	4751|Fungi	A	RNP domain protein	-	-
qsublack_gene_109195	9110.62	7817.25	21930.5	0.858037	2.40713	2.8054	0.795936	0.00388621	0.00519604	0.941727	0.177283	0.0276405	0.00560988	0.0402866	Au+	1.38e-178	KOG2190@1|root,KOG2190@2759|Eukaryota,38G1X@33154|Opisthokonta,3NYWM@4751|Fungi,3QJRW@4890|Ascomycota,20AH9@147545|Eurotiomycetes,3S6SF@5042|Eurotiales	4751|Fungi	A	KH domain RNA binding protein	-	K18738
qsublack_gene_109461	52811.9	15245.8	193530	0.288681	3.66451	12.694	0.352681	0.00519604	7.57756e-05	0.716613	0.177283	0.00140166	0.000818214	0.0179228	Au+	4.34e-128	COG0715@1|root,2QQ87@2759|Eukaryota,38GXI@33154|Opisthokonta,3NUEB@4751|Fungi,3QNCT@4890|Ascomycota,20BXD@147545|Eurotiomycetes,3S7R3@5042|Eurotiales	4751|Fungi	P	Thiamine biosynthesis protein (Nmt1)	-	K18278
qsublack_gene_110169	11681.4	5492.16	41477.6	0.470164	3.55075	7.55215	0.314999	0.00287947	1.08251e-05	0.689797	0.177283	0.000574593	0.000332018	0.0172216	Au+	0	COG0480@1|root,KOG0465@2759|Eukaryota,38GUI@33154|Opisthokonta,3NV2U@4751|Fungi,3QNG6@4890|Ascomycota,20F5T@147545|Eurotiomycetes,3S49I@5042|Eurotiales	4751|Fungi	J	Mitochondrial GTPase that catalyzes the GTP-dependent ribosomal translocation step during translation elongation. During this step, the ribosome changes from the pre-translocational (PRE) to the post-translocational (POST) state as the newly formed A- site-bound peptidyl-tRNA and P-site-bound deacylated tRNA move to the P and E sites, respectively. Catalyzes the coordinated movement of the two tR…	-	K02355
qsublack_gene_110228	550930	274861	1.35712e+06	0.498905	2.46333	4.93747	0.14314	0.00150469	2.16502e-05	0.497156	0.177283	0.000724144	0.00021605	0.0172216	Au+	0	COG0480@1|root,KOG0469@2759|Eukaryota,38CUM@33154|Opisthokonta,3NW98@4751|Fungi,3QKTN@4890|Ascomycota,20D5X@147545|Eurotiomycetes,3S693@5042|Eurotiales	4751|Fungi	J	Elongation factor	-	K03234
qsublack_gene_110422	34134.4	11534.1	92412.7	0.337902	2.70732	8.01215	0.739364	0.0146896	0.000205677	0.920279	0.182685	0.00258863	0.00271656	0.0278305	Au+	3.06e-217	2C2ZY@1|root,2S41G@2759|Eukaryota,39VK9@33154|Opisthokonta,3P0YX@4751|Fungi,3QNMI@4890|Ascomycota,20CYF@147545|Eurotiomycetes,3S78S@5042|Eurotiales	4751|Fungi	-	-	-	-
qsublack_gene_110613	60040.5	18472.8	164550	0.307673	2.74066	8.90769	0.314999	0.0114962	7.57756e-05	0.689797	0.17917	0.00140166	0.00115624	0.0201695	Au+	1.51e-80	COG0667@1|root,KOG1575@2759|Eukaryota,38F9P@33154|Opisthokonta,3NWNE@4751|Fungi,3QKWR@4890|Ascomycota,20E48@147545|Eurotiomycetes,3S3T0@5042|Eurotiales	4751|Fungi	C	Pyridoxal reductase (AKR8)	1.1.1.65	K05275
qsublack_gene_111158	47943.5	20903.7	152404	0.436007	3.17883	7.29078	0.684211	0.00388621	1.08251e-05	0.894493	0.177283	0.000574593	0.000538646	0.0172216	Au+	1.2e-83	COG0457@1|root,KOG0548@2759|Eukaryota,38GCK@33154|Opisthokonta,3NUK2@4751|Fungi,3QM6I@4890|Ascomycota,20DKT@147545|Eurotiomycetes,3S5WI@5042|Eurotiales	4751|Fungi	O	Heat shock protein (Sti1)	-	K09553
qsublack_gene_111377	54240.8	26434.8	170483	0.487361	3.14307	6.44916	0.528849	0.0146896	0.000487129	0.821246	0.182685	0.00477035	0.00329668	0.0305287	Au+	2.85e-65	COG2007@1|root,KOG3947@1|root,KOG3283@2759|Eukaryota,KOG3947@2759|Eukaryota,38C25@33154|Opisthokonta,3NWB7@4751|Fungi,3QN2M@4890|Ascomycota,20APU@147545|Eurotiomycetes,3S4B7@5042|Eurotiales	4751|Fungi	J	Belongs to the eukaryotic ribosomal protein eS8 family	-	K02995
qsublack_gene_111445	20190.1	6972.34	76250.6	0.345334	3.77663	10.9362	0.0432571	0.0146896	0.00150469	0.279663	0.182685	0.0106594	0.00191742	0.0240087	Au+	3.47e-74	KOG1471@1|root,KOG1471@2759|Eukaryota,39SE5@33154|Opisthokonta,3P036@4751|Fungi,3QPR1@4890|Ascomycota,20BWQ@147545|Eurotiomycetes,3S7NY@5042|Eurotiales	4751|Fungi	I	Phosphatidylinositol transfer protein sfh5	-	K19996
qsublack_gene_111593	66533.9	26361	123709	0.396204	1.85934	4.69289	0.00684146	0.0288056	2.16502e-05	0.131532	0.203276	0.000724144	0.000203337	0.0172216	Au+	1.7e-213	COG1748@1|root,KOG0172@2759|Eukaryota,38BKM@33154|Opisthokonta,3NUXI@4751|Fungi,3QKR4@4890|Ascomycota,20E24@147545|Eurotiomycetes,3S5NN@5042|Eurotiales	4751|Fungi	E	Saccharopine dehydrogenase	1.5.1.10,2.5.1.16	K00293,K00797
qsublack_gene_111603	50024.4	19909.4	104868	0.397994	2.09634	5.26727	0.0432571	0.0114962	1.08251e-05	0.279663	0.17917	0.000574593	0.000250287	0.0172216	Au+	2.47e-240	COG1269@1|root,KOG2189@2759|Eukaryota,38DQJ@33154|Opisthokonta,3NWGW@4751|Fungi,3QKFK@4890|Ascomycota,20CTG@147545|Eurotiomycetes,3S5HJ@5042|Eurotiales	4751|Fungi	P	Essential component of the vacuolar proton pump (V- ATPase), a multimeric enzyme that catalyzes the translocation of protons across the membranes. Required for assembly and activity of the V-ATPase	-	K02154
qsublack_gene_111670	142574	61612.8	327841	0.432145	2.29944	5.32099	0.279861	0.0288056	0.000129901	0.655994	0.203276	0.00195787	0.00212045	0.0249314	Au+	2.16e-105	COG5019@1|root,KOG2655@2759|Eukaryota,38BV0@33154|Opisthokonta,3NUM5@4751|Fungi,3QJPN@4890|Ascomycota,20D77@147545|Eurotiomycetes,3S4YU@5042|Eurotiales	4751|Fungi	DUZ	Belongs to the TRAFAC class TrmE-Era-EngA-EngB-Septin- like GTPase superfamily. Septin GTPase family	-	K16944
qsublack_gene_111719	19104.4	7600.53	40582	0.397841	2.12422	5.33937	0.105122	0.105122	0.00150469	0.428982	0.338025	0.0106594	0.00701293	0.0460896	Au+	6.42e-118	COG1472@1|root,2QR4D@2759|Eukaryota,39UMV@33154|Opisthokonta,3P0WZ@4751|Fungi,3R2MQ@4890|Ascomycota,20CVZ@147545|Eurotiomycetes,3S3D6@5042|Eurotiales	4751|Fungi	G	Belongs to the glycosyl hydrolase 3 family	3.2.1.21	K01188
qsublack_gene_111731	192981	160934	377824	0.833938	1.95783	2.34769	0.528849	0.00287947	0.000725281	0.821246	0.177283	0.00633972	0.00174731	0.0230199	Au+	8.49e-209	COG1012@1|root,KOG2455@2759|Eukaryota,38D6T@33154|Opisthokonta,3NWNB@4751|Fungi,3QMTQ@4890|Ascomycota,20BPW@147545|Eurotiomycetes,3S76B@5042|Eurotiales	4751|Fungi	C	Belongs to the aldehyde dehydrogenase family	1.2.1.88	K00294
qsublack_gene_111848	17874.6	6490.99	56332.3	0.36314	3.15153	8.67854	0.0089307	0.0288056	0.00208924	0.140682	0.203276	0.0138998	0.00160053	0.0221777	Au+	6.04e-49	COG0015@1|root,KOG2700@2759|Eukaryota,38D20@33154|Opisthokonta,3NU0G@4751|Fungi,3QMUU@4890|Ascomycota,20CQK@147545|Eurotiomycetes,3AZ7F@33183|Onygenales,3FVD1@34384|Arthrodermataceae	4751|Fungi	F	Belongs to the lyase 1 family. Adenylosuccinate lyase subfamily	4.3.2.2	K01756
qsublack_gene_111858	23299.6	6352.49	53197.3	0.272643	2.28318	8.37424	0.352681	0.0232306	0.000205677	0.716613	0.192276	0.00258863	0.00251419	0.0269502	Au+	7.63e-181	COG0179@1|root,COG0596@1|root,KOG1454@2759|Eukaryota,KOG1535@2759|Eukaryota,38DXI@33154|Opisthokonta,3NWBY@4751|Fungi,3QKG7@4890|Ascomycota,20FV3@147545|Eurotiomycetes,3SAV8@5042|Eurotiales	4751|Fungi	Q	Serine aminopeptidase, S33	-	-
qsublack_gene_112091	81429.8	54993.5	192448	0.675349	2.36336	3.49947	0.314999	0.00519604	2.16502e-05	0.689797	0.177283	0.000724144	0.000534492	0.0172216	Au+	0	COG0542@1|root,KOG1051@2759|Eukaryota,38CTT@33154|Opisthokonta,3NWFJ@4751|Fungi,3QN7B@4890|Ascomycota,20DBZ@147545|Eurotiomycetes,3S4JB@5042|Eurotiales	4751|Fungi	O	Belongs to the ClpA ClpB family	3.6.1.3	K01509,K03695
qsublack_gene_113019	19141.8	7948.8	54608.8	0.41526	2.85286	6.87006	0.314999	0.035463	0.000324753	0.689797	0.214861	0.00350857	0.00354829	0.0316675	Au+	2.1e-48	KOG0647@1|root,KOG0647@2759|Eukaryota,38DJV@33154|Opisthokonta,3NU7G@4751|Fungi,3QRX9@4890|Ascomycota,20EQT@147545|Eurotiomycetes,3S73U@5042|Eurotiales	4751|Fungi	A	Nuclear pore complex protein (SonA)	-	K14298
qsublack_gene_113668	179958	95608.3	476578	0.53128	2.64827	4.98469	0.352681	0.0146896	0.000487129	0.716613	0.182685	0.00477035	0.0027804	0.0280436	Au+	0	COG0383@1|root,KOG4342@2759|Eukaryota,38EQ8@33154|Opisthokonta,3NW9D@4751|Fungi,3QN9H@4890|Ascomycota,20DTS@147545|Eurotiomycetes,3S87G@5042|Eurotiales	4751|Fungi	G	Alpha-mannosidase	3.2.1.24	K01191
qsublack_gene_113838	213559	65968.5	467398	0.308901	2.18862	7.08517	0.0089307	0.0114962	1.08251e-05	0.140682	0.17917	0.000574593	0.000123729	0.0172216	Au+	1.69e-64	KOG0749@1|root,KOG0749@2759|Eukaryota,38B82@33154|Opisthokonta,3NWSK@4751|Fungi,3QJEA@4890|Ascomycota,20B1D@147545|Eurotiomycetes,3S4C0@5042|Eurotiales	4751|Fungi	C	Belongs to the mitochondrial carrier (TC 2.A.29) family	-	K05863
qsublack_gene_113925	46715.4	25142.9	104209	0.538214	2.23072	4.14467	0.739364	0.0185434	0.00208924	0.920279	0.186069	0.0138998	0.00785621	0.0494387	Au+	0	COG0060@1|root,KOG0434@2759|Eukaryota,38CIS@33154|Opisthokonta,3NVSZ@4751|Fungi,3QMG7@4890|Ascomycota,20C37@147545|Eurotiomycetes,3S7RA@5042|Eurotiales	4751|Fungi	J	Belongs to the class-I aminoacyl-tRNA synthetase family	6.1.1.5	K01870
qsublack_gene_114480	14909.3	5849.81	31373.8	0.392358	2.10431	5.36323	0.123005	0.352681	1.08251e-05	0.458299	0.637402	0.000574593	0.00286785	0.0285809	Au+	5.49e-10	29MJ0@1|root,2RUV2@2759|Eukaryota,39W7H@33154|Opisthokonta,3NZF3@4751|Fungi,3QPWA@4890|Ascomycota,216ZV@147550|Sordariomycetes,41MR4@639021|Magnaporthales	4751|Fungi	S	PLC-like phosphodiesterase	-	-
qsublack_gene_114911	42613.1	25834.4	112435	0.606255	2.6385	4.35214	0.970512	0.00519604	1.08251e-05	0.990388	0.177283	0.000574593	0.000717312	0.0178112	Au+	1.23e-22	COG0457@1|root,KOG0548@2759|Eukaryota,38GCK@33154|Opisthokonta,3NUK2@4751|Fungi,3QM6I@4890|Ascomycota,20DKT@147545|Eurotiomycetes,3MSBQ@451870|Chaetothyriomycetidae	4751|Fungi	O	Stress-induced-phosphoprotein 1	-	K09553
qsublack_gene_115055	65493.7	15563.4	170829	0.237632	2.60832	10.9763	0.279861	0.0232306	0.00105003	0.655994	0.192276	0.00838767	0.00442429	0.0353413	Au+	7.12e-142	COG4284@1|root,KOG2388@2759|Eukaryota,38G4Q@33154|Opisthokonta,3NVWY@4751|Fungi,3QMTW@4890|Ascomycota,20BYD@147545|Eurotiomycetes,3S6PW@5042|Eurotiales	4751|Fungi	M	UDP-N-acetylglucosamine pyrophosphorylase	2.7.7.23,2.7.7.83	K00972
qsublack_gene_115218	60922	19664.5	120545	0.322782	1.97868	6.13007	0.0524259	0.0892096	4.33004e-05	0.309444	0.310875	0.00102315	0.00112388	0.0199913	Au+	6.51e-139	COG0388@1|root,KOG0806@2759|Eukaryota,38TQE@33154|Opisthokonta,3NTXY@4751|Fungi,3QNCK@4890|Ascomycota,20DGF@147545|Eurotiomycetes,3S86J@5042|Eurotiales	4751|Fungi	E	Nitrilase family protein (Nit3)	3.5.1.3	K13566
qsublack_gene_115755	49353.6	32355.8	207561	0.655592	4.20559	6.41495	0.853428	0.00519604	0.000487129	0.959386	0.177283	0.00477035	0.00225593	0.0258198	Au+	2.68e-12	COG2303@1|root,KOG1238@2759|Eukaryota,38UEK@33154|Opisthokonta,3NWDN@4751|Fungi,3QREZ@4890|Ascomycota,203HV@147541|Dothideomycetes,4KCSS@92860|Pleosporales	4751|Fungi	E	GMC oxidoreductase	-	-
qsublack_gene_115980	41335.1	9963.99	122599	0.241054	2.96597	12.3042	0.435872	0.0288056	0.00150469	0.762178	0.203276	0.0106594	0.00702198	0.0460896	Au+	1.69000000000319e-313	2AYQ6@1|root,2S03U@2759|Eukaryota,39YQD@33154|Opisthokonta,3NYGT@4751|Fungi,3QT2A@4890|Ascomycota,20C6P@147545|Eurotiomycetes,3S4C7@5042|Eurotiales	4751|Fungi	-	-	-	-
qsublack_gene_116071	564675	226760	792806	0.401576	1.404	3.49623	0.0185434	0.14314	7.57756e-05	0.188391	0.394322	0.00140166	0.00100844	0.0193855	Au+	1.23e-30	COG2303@1|root,KOG1238@2759|Eukaryota,38B8Z@33154|Opisthokonta,3NXIY@4751|Fungi,3QKFY@4890|Ascomycota,213Y3@147550|Sordariomycetes,1F1AW@1028384|Glomerellales	4751|Fungi	E	Belongs to the GMC oxidoreductase family	1.1.3.13	K17066
qsublack_gene_116719	109075	67911.6	260083	0.622616	2.38445	3.82973	0.684211	0.0185434	0.00150469	0.894493	0.186069	0.0106594	0.00660027	0.0443957	Au+	4.37e-129	KOG0758@1|root,KOG0758@2759|Eukaryota,38BD7@33154|Opisthokonta,3NTYD@4751|Fungi,3QKIE@4890|Ascomycota,20F00@147545|Eurotiomycetes,3S6S0@5042|Eurotiales	4751|Fungi	C	Belongs to the mitochondrial carrier (TC 2.A.29) family	-	K15109
qsublack_gene_116882	53208.2	25222.2	94962	0.474028	1.78473	3.76502	0.0892096	0.0630128	4.33004e-05	0.396036	0.262853	0.00102315	0.00123968	0.0202693	Au+	8.98e-30	29YJK@1|root,2RXU4@2759|Eukaryota,39RWE@33154|Opisthokonta,3NXAF@4751|Fungi,3QPUK@4890|Ascomycota,20AG6@147545|Eurotiomycetes,3S6Q4@5042|Eurotiales	4751|Fungi	S	Mitochondrial genome maintenance protein MGM101	-	-
qsublack_gene_117005	409614	163537	786115	0.399246	1.91916	4.80696	0.0146896	0.0432571	2.16502e-05	0.169987	0.228284	0.000724144	0.000343789	0.0172216	Au+	4.75e-67	COG0148@1|root,KOG2670@2759|Eukaryota,38C66@33154|Opisthokonta,3NXC1@4751|Fungi,3QM10@4890|Ascomycota,20D50@147545|Eurotiomycetes,3S39B@5042|Eurotiales	4751|Fungi	G	Enolase allergen Asp F 22	4.2.1.11	K01689
qsublack_gene_117537	26629.2	11054.8	66980.7	0.415137	2.51531	6.05898	0.217563	0.00208924	1.08251e-05	0.588496	0.177283	0.000574593	0.00024391	0.0172216	Au+	3.55e-70	COG1932@1|root,KOG2790@2759|Eukaryota,38B9C@33154|Opisthokonta,3NUNH@4751|Fungi,3QMYX@4890|Ascomycota,20B0Y@147545|Eurotiomycetes,3S6HQ@5042|Eurotiales	4751|Fungi	E	Phosphoserine aminotransferase	2.6.1.52	K00831
qsublack_gene_117615	55837.9	18358.1	119917	0.328774	2.14759	6.5321	0.075256	0.0146896	1.08251e-05	0.366523	0.182685	0.000574593	0.000366227	0.0172216	Au+	1e-170	COG1012@1|root,KOG2450@2759|Eukaryota,39RV1@33154|Opisthokonta,3NUPB@4751|Fungi,3QQVQ@4890|Ascomycota,20E2B@147545|Eurotiomycetes,3S6XE@5042|Eurotiales	4751|Fungi	C	Belongs to the aldehyde dehydrogenase family	-	-
qsublack_gene_117634	58326.7	37993.1	111205	0.651384	1.90658	2.92697	0.393048	0.0232306	0.000725281	0.732217	0.192276	0.00633972	0.00436194	0.0350727	Au+	0	COG0476@1|root,KOG2012@2759|Eukaryota,38C42@33154|Opisthokonta,3NURC@4751|Fungi,3QPCX@4890|Ascomycota,20CT6@147545|Eurotiomycetes,3S4AG@5042|Eurotiales	4751|Fungi	O	Belongs to the ubiquitin-activating E1 family	6.2.1.45	K03178
qsublack_gene_117686	13861.1	6876.58	31674	0.496106	2.2851	4.60607	0.190316	0.0432571	0.000487129	0.555404	0.228284	0.00477035	0.00364575	0.0322136	Au+	1.1e-11	KOG3480@1|root,KOG3480@2759|Eukaryota,3A8N1@33154|Opisthokonta,3P6VS@4751|Fungi,3QXHZ@4890|Ascomycota,20IHY@147545|Eurotiomycetes,3S96U@5042|Eurotiales	4751|Fungi	U	translocase subunit Tim10	-	K17778,K17781
qsublack_gene_117687	51872.9	30021.2	86101.2	0.578747	1.65985	2.86801	0.217563	0.0524259	0.000324753	0.588496	0.245851	0.00350857	0.00364575	0.0322136	Au+	3.89e-33	KOG3480@1|root,KOG3480@2759|Eukaryota,3A8N1@33154|Opisthokonta,3P6VS@4751|Fungi,3QXHZ@4890|Ascomycota,20IHY@147545|Eurotiomycetes,3S96U@5042|Eurotiales	4751|Fungi	U	translocase subunit Tim10	-	K17778,K17781
qsublack_gene_117891	14258.4	6546.14	39436.9	0.459107	2.76587	6.02446	0.075256	0.0432571	0.00150469	0.366523	0.228284	0.0106594	0.00390883	0.0334488	Au+	9.17e-53	KOG3457@1|root,KOG3457@2759|Eukaryota,3A8H3@33154|Opisthokonta,3P6QV@4751|Fungi,3QWNG@4890|Ascomycota,20HEV@147545|Eurotiomycetes,3S8ZS@5042|Eurotiales	4751|Fungi	U	Necessary for protein translocation in the endoplasmic reticulum	-	K09481
qsublack_gene_118239	31605.8	12979.1	62919.6	0.410655	1.99076	4.84777	0.105122	0.0630128	0.000205677	0.428982	0.262853	0.00258863	0.00232688	0.0261417	Au+	5.47e-193	KOG3296@1|root,KOG3296@2759|Eukaryota,38FFD@33154|Opisthokonta,3NURF@4751|Fungi,3QMRT@4890|Ascomycota,20CDF@147545|Eurotiomycetes,3S6AA@5042|Eurotiales	4751|Fungi	U	Mitochondrial import receptor subunit tom-40	-	K11518
qsublack_gene_118297	18370.9	6209	51390.6	0.33798	2.7974	8.2768	0.393048	0.0089307	0.000487129	0.732217	0.177283	0.00477035	0.0022676	0.0258323	Au+	1.26e-132	COG1605@1|root,KOG0795@2759|Eukaryota,39TAH@33154|Opisthokonta,3NVBS@4751|Fungi,3QKJS@4890|Ascomycota,20AED@147545|Eurotiomycetes,3S4E9@5042|Eurotiales	4751|Fungi	E	Chorismate mutase	5.4.99.5	K01850
qsublack_gene_119030	166407	83230.7	301372	0.500163	1.81105	3.62092	0.0892096	0.0524259	0.000205677	0.396036	0.245851	0.00258863	0.00194734	0.0242178	Au+	1.16e-141	COG1155@1|root,KOG1352@2759|Eukaryota,3AJZ9@33154|Opisthokonta,3Q3J7@4751|Fungi,3RKKQ@4890|Ascomycota,20FV1@147545|Eurotiomycetes,3B17J@33183|Onygenales	4751|Fungi	C	Vacuolar ATP synthase catalytic subunit A	3.6.3.14	K02145
qsublack_gene_120188	118024	18771.4	120213	0.159048	1.01855	6.40407	0.00208924	0.279861	7.57756e-05	0.109855	0.564889	0.00140166	0.000488962	0.0172216	Au+	1.09e-198	COG0620@1|root,KOG2263@2759|Eukaryota,38GZS@33154|Opisthokonta,3NW49@4751|Fungi,3QN7P@4890|Ascomycota,20D5V@147545|Eurotiomycetes,3B0DP@33183|Onygenales,3FMV4@34383|Onygenales incertae sedis	4751|Fungi	E	Cobalamin-independent synthase, N-terminal domain	2.1.1.14	K00549
qsublack_gene_120519	163966	97943.7	424305	0.597342	2.58776	4.33213	0.630529	0.0185434	0.00150469	0.869797	0.186069	0.0106594	0.00754816	0.0482463	Au+	1.36e-146	COG0451@1|root,KOG1502@2759|Eukaryota,38GV9@33154|Opisthokonta,3NVWR@4751|Fungi,3QKQS@4890|Ascomycota,20CZ1@147545|Eurotiomycetes,3S804@5042|Eurotiales	4751|Fungi	V	3-beta hydroxysteroid dehydrogenase/isomerase family	1.1.1.283	K17741
qsublack_gene_120586	124715	57193.6	270376	0.458594	2.16795	4.72738	0.279861	0.0185434	0.000205677	0.655994	0.186069	0.00258863	0.00200083	0.0244676	Au+	5.88e-47	COG0300@1|root,KOG1014@2759|Eukaryota,39VGD@33154|Opisthokonta,3NTW1@4751|Fungi,3QMJ5@4890|Ascomycota,20B2G@147545|Eurotiomycetes,3S684@5042|Eurotiales	4751|Fungi	Q	Oxidoreductase, short chain dehydrogenase reductase family	-	-
qsublack_gene_120664	42769	22872.1	86696.3	0.534782	2.02708	3.79048	0.0892096	0.0185434	4.33004e-05	0.396036	0.186069	0.00102315	0.000662162	0.0173226	Au+	2.56e-150	COG0461@1|root,KOG1377@2759|Eukaryota,39WUY@33154|Opisthokonta,3NY1H@4751|Fungi,3QUGI@4890|Ascomycota,20DJ1@147545|Eurotiomycetes,3S9EE@5042|Eurotiales	4751|Fungi	F	Orotate phosphoribosyltransferase	2.4.2.10	K00762
qsublack_gene_120668	48131.7	21603.5	90567.1	0.448841	1.88165	4.19224	0.352681	0.105122	2.16502e-05	0.716613	0.338025	0.000724144	0.0030748	0.0295189	Au+	7.96e-24	COG1436@1|root,KOG3432@2759|Eukaryota,3A3I9@33154|Opisthokonta,3P3TN@4751|Fungi,3QV60@4890|Ascomycota,20HCH@147545|Eurotiomycetes,3B3EP@33183|Onygenales,3FP0H@34383|Onygenales incertae sedis	4751|Fungi	C	Subunit of the peripheral V1 complex of vacuolar ATPase essential for assembly or catalytic function. V-ATPase is responsible for acidifying a variety of intracellular compartments in eukaryotic cells	-	K02151
qsublack_gene_120980	70702.6	34142.3	124019	0.482901	1.7541	3.63242	0.0288056	0.0630128	0.000324753	0.230602	0.262853	0.00350857	0.00147367	0.021757	Au+	3.24e-40	KOG0118@1|root,KOG0118@2759|Eukaryota,38CF6@33154|Opisthokonta,3NW7K@4751|Fungi,3QMU9@4890|Ascomycota,20ATR@147545|Eurotiomycetes,3S32A@5042|Eurotiales	4751|Fungi	A	RNP domain protein	-	-
qsublack_gene_121031	45242.3	32371.8	110194	0.715521	2.43563	3.404	0.739364	0.00519604	7.57756e-05	0.920279	0.177283	0.00140166	0.00110376	0.0199913	Au+	1.94e-218	COG1104@1|root,KOG1549@2759|Eukaryota,38E7D@33154|Opisthokonta,3NUA7@4751|Fungi,3QMGK@4890|Ascomycota,20AFQ@147545|Eurotiomycetes,3S5C1@5042|Eurotiales	4751|Fungi	E	tRNA splicing protein (Spl1)	2.8.1.7	K04487
qsublack_gene_121054	122637	38354.8	234820	0.312751	1.91476	6.12232	0.279861	0.105122	0.000324753	0.655994	0.338025	0.00350857	0.00617194	0.0426102	Au+	8.01e-44	COG0673@1|root,KOG2742@2759|Eukaryota,38F59@33154|Opisthokonta,3NWJK@4751|Fungi,3QRH6@4890|Ascomycota,20DBD@147545|Eurotiomycetes,3S6NU@5042|Eurotiales	4751|Fungi	S	NAD binding Rossmann fold oxidoreductase	-	-
qsublack_gene_121142	24708.7	6656.87	101718	0.269414	4.11667	15.2801	0.0524259	0.00519604	0.000324753	0.309444	0.177283	0.00350857	0.000639491	0.0172216	Au+	1.6e-90	COG5184@1|root,KOG1426@2759|Eukaryota,39G0B@33154|Opisthokonta,3NVDB@4751|Fungi,3QMM5@4890|Ascomycota,20BHC@147545|Eurotiomycetes,3S3MQ@5042|Eurotiales	4751|Fungi	DZ	Ran exchange factor Prp20 Pim1	-	K11493
qsublack_gene_121160	263554	145326	642750	0.551408	2.43878	4.42282	0.217563	0.0288056	0.00105003	0.588496	0.203276	0.00838767	0.0044072	0.0353203	Au+	1.47e-151	COG1250@1|root,KOG2304@2759|Eukaryota,38CEZ@33154|Opisthokonta,3NVKS@4751|Fungi,3QNPY@4890|Ascomycota,20D1K@147545|Eurotiomycetes,3S421@5042|Eurotiales	4751|Fungi	I	3-hydroxybutyryl-CoA dehydrogenase	1.1.1.157	K00074
qsublack_gene_121180	96529.9	63480.8	203187	0.657629	2.10491	3.20076	0.352681	0.0146896	0.000129901	0.716613	0.182685	0.00195787	0.00165514	0.0225351	Au+	1.86e-55	COG0045@1|root,KOG2799@2759|Eukaryota,38D0K@33154|Opisthokonta,3NUY0@4751|Fungi,3QN4R@4890|Ascomycota,20ANX@147545|Eurotiomycetes,3B1FN@33183|Onygenales,3FIYK@34383|Onygenales incertae sedis	4751|Fungi	F	Succinyl-CoA synthetase functions in the citric acid cycle (TCA), coupling the hydrolysis of succinyl-CoA to the synthesis of ATP and thus represents the only step of substrate- level phosphorylation in the TCA. The beta subunit provides nucleotide specificity of the enzyme and binds the substrate succinate, while the binding sites for coenzyme A and phosphate are found in the alpha subunit	6.2.1.4,6.2.1.5	K01900
qsublack_gene_121328	350591	165673	764214	0.472554	2.17979	4.61278	0.393048	0.0892096	0.000324753	0.732217	0.310875	0.00350857	0.00675536	0.0450598	Au+	2.39e-149	COG0346@1|root,KOG2944@2759|Eukaryota,38CS6@33154|Opisthokonta,3NVC4@4751|Fungi,3QJCR@4890|Ascomycota,20CCG@147545|Eurotiomycetes,3S4CS@5042|Eurotiales	4751|Fungi	G	Catalyzes the conversion of hemimercaptal, formed from methylglyoxal and glutathione, to S-lactoylglutathione	4.4.1.5	K01759
qsublack_gene_121594	19618.7	8508.13	48108	0.433674	2.45214	5.65435	0.217563	0.0288056	0.000129901	0.588496	0.203276	0.00195787	0.00186857	0.0238436	Au+	2.68e-127	COG0441@1|root,KOG1637@2759|Eukaryota,38C5Y@33154|Opisthokonta,3NUM7@4751|Fungi,3QJQE@4890|Ascomycota,20CUU@147545|Eurotiomycetes,3S4EV@5042|Eurotiales	4751|Fungi	J	threonyl-tRNA synthetase	6.1.1.3	K01868
qsublack_gene_121858	47753.6	30048.7	110886	0.629244	2.32205	3.69021	0.739364	0.0288056	4.33004e-05	0.920279	0.203276	0.00102315	0.00313894	0.0298607	Au+	7.16e-46	KOG3156@1|root,KOG3156@2759|Eukaryota,39SGQ@33154|Opisthokonta,3P09U@4751|Fungi,3QJI1@4890|Ascomycota,20CN3@147545|Eurotiomycetes,3S6UR@5042|Eurotiales	4751|Fungi	IQ	Protein of unknown function (DUF1640)	-	-
qsublack_gene_121886	40696.5	18393.3	67802.8	0.451963	1.66606	3.68627	0.123005	0.105122	7.57756e-05	0.458299	0.338025	0.00140166	0.00234497	0.0261843	Au+	3.75e-182	COG1222@1|root,KOG0651@2759|Eukaryota,38B5M@33154|Opisthokonta,3NVBE@4751|Fungi,3QKKA@4890|Ascomycota,20FF8@147545|Eurotiomycetes,3S7Y0@5042|Eurotiales	4751|Fungi	O	Belongs to the AAA ATPase family	-	K03064
qsublack_gene_121887	12844.5	8085.66	19922.7	0.629505	1.55107	2.46395	0.0630128	0.0630128	0.000725281	0.339389	0.262853	0.00633972	0.00305108	0.0294068	Au+	7.78e-33	COG1222@1|root,KOG0651@2759|Eukaryota,38B5M@33154|Opisthokonta,3NVBE@4751|Fungi,3QKKA@4890|Ascomycota,20FF8@147545|Eurotiomycetes,3B2B8@33183|Onygenales,3FKXV@34383|Onygenales incertae sedis	4751|Fungi	O	Belongs to the AAA ATPase family	-	K03064
qsublack_gene_121897	294903	149326	411094	0.506356	1.39399	2.75299	0.0630128	0.217563	0.000725281	0.339389	0.494768	0.00633972	0.00560988	0.0402866	Au+	2.56e-49	COG5040@1|root,KOG0841@2759|Eukaryota,38CKG@33154|Opisthokonta,3NU75@4751|Fungi,3QQ0I@4890|Ascomycota,20ETC@147545|Eurotiomycetes,3S4JF@5042|Eurotiales	4751|Fungi	O	Belongs to the 14-3-3 family	-	K06630
qsublack_gene_123060	40460.8	13586.7	93424.3	0.335799	2.30901	6.87615	0.0288056	0.035463	2.16502e-05	0.230602	0.214861	0.000724144	0.000430326	0.0172216	Au+	2.09e-171	COG0459@1|root,KOG0358@2759|Eukaryota,39NW1@33154|Opisthokonta,3NW0D@4751|Fungi,3QMH7@4890|Ascomycota,20E1T@147545|Eurotiomycetes,3S7P7@5042|Eurotiales	4751|Fungi	O	assists the folding of proteins upon ATP hydrolysis	-	K09496
qsublack_gene_123083	186563	110930	324955	0.5946	1.7418	2.92936	0.0892096	0.0185434	0.000725281	0.396036	0.186069	0.00633972	0.00201898	0.0246074	Au+	5.72e-157	COG1071@1|root,KOG1182@2759|Eukaryota,38B43@33154|Opisthokonta,3NW4W@4751|Fungi,3QJZK@4890|Ascomycota,20AJC@147545|Eurotiomycetes,3S447@5042|Eurotiales	4751|Fungi	C	2-oxoisovalerate dehydrogenase complex alpha subunit	1.2.4.4	K00166
qsublack_gene_123235	5341.67	5860.27	11831.7	1.09709	2.21499	2.01897	0.393048	0.000205677	0.000487129	0.732217	0.177283	0.00477035	0.00044731	0.0172216	Au+	1.07e-185	2APP8@1|root,2RZH4@2759|Eukaryota,39XE5@33154|Opisthokonta,3NUQU@4751|Fungi,3QSJC@4890|Ascomycota,20F15@147545|Eurotiomycetes,3S5JU@5042|Eurotiales	4751|Fungi	S	TPR domain protein	-	-
qsublack_gene_123248	40651.1	16794.3	107483	0.413132	2.64402	6.39995	0.247451	0.00684146	1.08251e-05	0.622878	0.177283	0.000574593	0.000450787	0.0172216	Au+	1.19e-286	COG0028@1|root,KOG1185@2759|Eukaryota,38EFU@33154|Opisthokonta,3NU41@4751|Fungi,3QMA8@4890|Ascomycota,20CUP@147545|Eurotiomycetes,3SCJ3@5042|Eurotiales	4751|Fungi	EH	Belongs to the TPP enzyme family	-	K12261
qsublack_gene_123382	78563.8	35699.9	171557	0.454406	2.18367	4.80554	0.352681	0.0432571	4.33004e-05	0.716613	0.228284	0.00102315	0.00212045	0.0249314	Au+	8.47e-116	COG4690@1|root,KOG2826@2759|Eukaryota,39RNU@33154|Opisthokonta,3NV59@4751|Fungi,3QJIR@4890|Ascomycota,20AZT@147545|Eurotiomycetes,3S7GC@5042|Eurotiales	4751|Fungi	Z	Functions as actin-binding component of the Arp2 3 complex which is involved in regulation of actin polymerization and together with an activating nucleation-promoting factor (NPF) mediates the formation of branched actin networks	-	K05758
qsublack_gene_123390	17611.9	7570.16	41075.5	0.429832	2.33226	5.42598	0.0432571	0.0892096	0.000129901	0.279663	0.310875	0.00195787	0.00147367	0.021757	Au+	1.09e-266	COG0154@1|root,KOG1558@1|root,KOG1212@2759|Eukaryota,KOG1558@2759|Eukaryota,38CWX@33154|Opisthokonta,3NTYP@4751|Fungi,3QKVY@4890|Ascomycota,20CES@147545|Eurotiomycetes,3SEU0@5042|Eurotiales	4751|Fungi	IJT	Amidase	3.5.1.4	K01426
qsublack_gene_123715	68173.9	10277.2	222237	0.150749	3.25985	21.6243	0.217563	0.0432571	0.00208924	0.588496	0.228284	0.0138998	0.00746101	0.0480668	Au+	6.37e-180	COG1208@1|root,KOG1322@2759|Eukaryota,38EU6@33154|Opisthokonta,3NTZ3@4751|Fungi,3QM7P@4890|Ascomycota,20ARK@147545|Eurotiomycetes,3S33H@5042|Eurotiales	4751|Fungi	H	mannose-1-phosphate	2.7.7.13	K00966
qsublack_gene_123854	42145.2	14168.4	113614	0.336179	2.69578	8.01886	0.279861	0.035463	0.000725281	0.655994	0.214861	0.00633972	0.00467068	0.0366303	Au+	1.48e-57	COG0526@1|root,KOG0190@2759|Eukaryota,38GTB@33154|Opisthokonta,3NZ2W@4751|Fungi,3QJD6@4890|Ascomycota,20B16@147545|Eurotiomycetes,3S4KB@5042|Eurotiales	4751|Fungi	O	Protein disulfide isomerase	5.3.4.1	K09580
qsublack_gene_123994	43242.4	18314.1	84989	0.423522	1.96541	4.64062	0.0146896	0.035463	0.000129901	0.169987	0.214861	0.00195787	0.000570848	0.0172216	Au+	1.33e-70	COG0330@1|root,KOG2620@2759|Eukaryota,38B65@33154|Opisthokonta,3NX7K@4751|Fungi,3QMYM@4890|Ascomycota,20DG1@147545|Eurotiomycetes,3S6M3@5042|Eurotiales	4751|Fungi	C	C-terminal region of band_7	-	-
qsublack_gene_124091	23585.3	9728.6	100862	0.412486	4.2765	10.3676	0.14314	0.00684146	0.000487129	0.497156	0.177283	0.00477035	0.00131889	0.0209109	Au+	5.4e-220	KOG1041@1|root,KOG1041@2759|Eukaryota,38CFV@33154|Opisthokonta,3NU0D@4751|Fungi,3QKH9@4890|Ascomycota,20EWH@147545|Eurotiomycetes,3S5XT@5042|Eurotiales	4751|Fungi	J	Belongs to the argonaute family	-	K11593
qsublack_gene_124288	16808.3	6261.91	41836.7	0.372549	2.48905	6.68114	0.247451	0.0232306	7.57756e-05	0.622878	0.192276	0.00140166	0.00148512	0.021757	Au+	4.9e-20	COG0231@1|root,KOG3271@2759|Eukaryota,39ZYU@33154|Opisthokonta,3P1UC@4751|Fungi,3QMZ0@4890|Ascomycota,20E6H@147545|Eurotiomycetes,3S8KC@5042|Eurotiales	4751|Fungi	J	Translation initiation factor	-	K03263
qsublack_gene_124433	40483.9	13738.6	95131.2	0.33936	2.34985	6.92437	0.684211	0.0630128	0.000324753	0.894493	0.262853	0.00350857	0.00731799	0.0474374	Au+	2.49e-211	COG0524@1|root,KOG2855@2759|Eukaryota,38FCH@33154|Opisthokonta,3NX2B@4751|Fungi,3QRGU@4890|Ascomycota,20EVY@147545|Eurotiomycetes,3S364@5042|Eurotiales	4751|Fungi	G	Catalyzes the phosphorylation of ribose at O-5 in a reaction requiring ATP and magnesium. The resulting D-ribose-5- phosphate can then be used either for sythesis of nucleotides, histidine, and tryptophan, or as a component of the pentose phosphate pathway	2.7.1.15	K00852
qsublack_gene_124838	114422	68213.3	285045	0.596156	2.49117	4.17873	0.435872	0.00684146	7.57756e-05	0.762178	0.177283	0.00140166	0.00102814	0.0193855	Au+	1.28e-148	COG0115@1|root,KOG0975@2759|Eukaryota,38GTA@33154|Opisthokonta,3NVAG@4751|Fungi,3QNX1@4890|Ascomycota,20BY4@147545|Eurotiomycetes,3S5UQ@5042|Eurotiales	4751|Fungi	E	Belongs to the class-IV pyridoxal-phosphate-dependent aminotransferase family	2.6.1.42	K00826
qsublack_gene_124905	139405	70270.5	208070	0.504075	1.49256	2.96099	0.0432571	0.165494	0.00105003	0.279663	0.426096	0.00838767	0.00476196	0.0369506	Au+	5.33e-108	COG1890@1|root,KOG1628@2759|Eukaryota,38EQE@33154|Opisthokonta,3NVFE@4751|Fungi,3QMBR@4890|Ascomycota,20ANE@147545|Eurotiomycetes,3S2RR@5042|Eurotiales	4751|Fungi	J	Belongs to the eukaryotic ribosomal protein eS1 family	-	K02984
qsublack_gene_124915	26258.8	16553.8	54353.4	0.630408	2.06991	3.28344	0.684211	0.00684146	0.000725281	0.894493	0.177283	0.00633972	0.00286785	0.0285809	Au+	1.87e-87	COG0172@1|root,KOG2509@2759|Eukaryota,38CFZ@33154|Opisthokonta,3NX0Y@4751|Fungi,3QNVQ@4890|Ascomycota,20DIQ@147545|Eurotiomycetes,3S765@5042|Eurotiales	4751|Fungi	J	seryl-tRNA synthetase	6.1.1.11	K01875
qsublack_gene_124916	17735	10265.8	33490.5	0.578844	1.88839	3.26234	0.314999	0.0185434	0.000324753	0.689797	0.186069	0.00350857	0.00251419	0.0269502	Au+	7.12e-84	COG0172@1|root,KOG2509@2759|Eukaryota,38CFZ@33154|Opisthokonta,3NX0Y@4751|Fungi,3QNVQ@4890|Ascomycota,20DIQ@147545|Eurotiomycetes,3S765@5042|Eurotiales	4751|Fungi	J	seryl-tRNA synthetase	6.1.1.11	K01875
qsublack_gene_125330	85028.2	31343.1	152301	0.36862	1.79119	4.85917	0.217563	0.190316	0.000324753	0.588496	0.459935	0.00350857	0.00758722	0.0482842	Au+	4.01e-240	COG0664@1|root,KOG1113@2759|Eukaryota,38GS1@33154|Opisthokonta,3NU9Z@4751|Fungi,3QKI5@4890|Ascomycota,20B0K@147545|Eurotiomycetes,3S7XK@5042|Eurotiales	4751|Fungi	T	cAMP-dependent protein kinase regulatory subunit	-	K04739
qsublack_gene_125415	17461.3	10319.3	55380	0.590979	3.17158	5.36665	0.911797	0.00287947	0.000725281	0.975879	0.177283	0.00633972	0.00204257	0.0248123	Au+	3.2e-65	KOG1073@1|root,KOG1073@2759|Eukaryota,38HND@33154|Opisthokonta,3NY1Q@4751|Fungi,3QQ21@4890|Ascomycota,20FGH@147545|Eurotiomycetes,3S3QF@5042|Eurotiales	4751|Fungi	U	G2 M phase checkpoint control protein Sum2	-	K18749
qsublack_gene_125614	100046	51447	143698	0.514234	1.43632	2.79312	0.00684146	0.165494	0.00388621	0.131532	0.426096	0.0222394	0.00395449	0.0334488	Au+	7.31e-49	COG2070@1|root,2QTWN@2759|Eukaryota,397Z1@33154|Opisthokonta,3NWW5@4751|Fungi,3QKGZ@4890|Ascomycota,20E39@147545|Eurotiomycetes,3S2ZP@5042|Eurotiales	4751|Fungi	E	Oxidoreductase, 2-nitropropane dioxygenase family	-	-
qsublack_gene_125627	11553.5	6475.92	22071.7	0.560515	1.91039	3.40828	0.0114962	0.0232306	2.16502e-05	0.154231	0.192276	0.000724144	0.000231641	0.0172216	Au+	0	COG0532@1|root,KOG1144@2759|Eukaryota,38DE9@33154|Opisthokonta,3NX6J@4751|Fungi,3QKBR@4890|Ascomycota,20EKU@147545|Eurotiomycetes,3S823@5042|Eurotiales	4751|Fungi	J	Translation initiation factor	-	K03243
qsublack_gene_125702	66580.6	33977.5	100525	0.510321	1.50983	2.95858	0.0185434	0.0524259	0.000205677	0.188391	0.245851	0.00258863	0.000916601	0.0185472	Au+	7.02e-25	COG0308@1|root,KOG1046@2759|Eukaryota,38CFG@33154|Opisthokonta,3NWST@4751|Fungi,3QMW3@4890|Ascomycota,214HF@147550|Sordariomycetes,3TH7P@5125|Hypocreales,1FNIZ@110618|Nectriaceae	4751|Fungi	EO	to aminopeptidase B	-	-
qsublack_gene_125720	29392.5	10153.3	69797.8	0.34544	2.37468	6.87436	0.0630128	0.0892096	4.33004e-05	0.339389	0.310875	0.00102315	0.00123968	0.0202693	Au+	1.16e-125	COG0626@1|root,KOG0053@2759|Eukaryota,38F3Q@33154|Opisthokonta,3NVTU@4751|Fungi,3QPPV@4890|Ascomycota,20CZZ@147545|Eurotiomycetes,3S64G@5042|Eurotiales	4751|Fungi	E	Homocysteine synthase CysD	2.5.1.47,2.5.1.49	K17069
qsublack_gene_125721	65387.1	24943.8	169937	0.381479	2.59894	6.81279	0.393048	0.0630128	0.000129901	0.732217	0.262853	0.00195787	0.0039596	0.0334533	Au+	2.78e-26	COG0626@1|root,KOG0053@2759|Eukaryota,38F3Q@33154|Opisthokonta,3NVTU@4751|Fungi,3QPPV@4890|Ascomycota,1ZZP4@147541|Dothideomycetes	4751|Fungi	E	DegT/DnrJ/EryC1/StrS aminotransferase family	2.5.1.47,2.5.1.49	K17069
qsublack_gene_125764	58464.9	31952	120905	0.546515	2.06799	3.78395	0.279861	0.0288056	0.000725281	0.655994	0.203276	0.00633972	0.0041909	0.0345279	Au+	0	COG0464@1|root,KOG0741@2759|Eukaryota,38CBE@33154|Opisthokonta,3NV43@4751|Fungi,3QKQE@4890|Ascomycota,20CAU@147545|Eurotiomycetes,3S59B@5042|Eurotiales	4751|Fungi	O	Vesicular fusion ATPase	3.6.4.6	K06027
qsublack_gene_126060	81916.6	71939.6	190880	0.878205	2.33017	2.65333	0.795936	0.00287947	0.00105003	0.941727	0.177283	0.00838767	0.00229113	0.025899	Au+	1.06e-71	COG3185@1|root,KOG0638@2759|Eukaryota,38BA4@33154|Opisthokonta,3NWM8@4751|Fungi,3QN1X@4890|Ascomycota,20B4F@147545|Eurotiomycetes,3S5Y8@5042|Eurotiales	4751|Fungi	E	4-hydroxyphenylpyruvate dioxygenase	1.13.11.27	K00457
qsublack_gene_126061	206236	145239	416664	0.704235	2.02032	2.86882	0.247451	0.0185434	0.00287947	0.622878	0.186069	0.0177096	0.00610856	0.0422922	Au+	3.26e-120	COG3185@1|root,KOG0638@2759|Eukaryota,38BA4@33154|Opisthokonta,3NWM8@4751|Fungi,3QN1X@4890|Ascomycota,20B4F@147545|Eurotiomycetes,3S5Y8@5042|Eurotiales	4751|Fungi	E	4-hydroxyphenylpyruvate dioxygenase	1.13.11.27	K00457
qsublack_gene_126247	26332.9	18302.8	52520.2	0.695055	1.99447	2.86951	0.217563	0.00519604	0.000129901	0.588496	0.177283	0.00195787	0.000799429	0.0179228	Au+	0	COG0145@1|root,KOG1939@2759|Eukaryota,38C8D@33154|Opisthokonta,3NU0K@4751|Fungi,3QPUZ@4890|Ascomycota,20EXK@147545|Eurotiomycetes,3SAWY@5042|Eurotiales	4751|Fungi	E	Hydantoinase B/oxoprolinase	3.5.2.9	K01469
qsublack_gene_126736	34135.5	8741.59	113288	0.256085	3.31878	12.9596	0.123005	0.0630128	0.000487129	0.458299	0.262853	0.00477035	0.00356665	0.0316675	Au+	3.22e-207	COG3508@1|root,KOG1417@2759|Eukaryota,39ZA2@33154|Opisthokonta,3NYNZ@4751|Fungi,3QSJZ@4890|Ascomycota,20ESY@147545|Eurotiomycetes,3S7T7@5042|Eurotiales	4751|Fungi	E	homogentisate 1,2-dioxygenase	1.13.11.5	K00451
qsublack_gene_126845	147831	58694.7	319817	0.397039	2.16339	5.44882	0.0524259	0.0185434	2.16502e-05	0.309444	0.186069	0.000724144	0.000420446	0.0172216	Au+	1.23e-37	COG5044@1|root,KOG1439@2759|Eukaryota,38CZK@33154|Opisthokonta,3NU8W@4751|Fungi,3QK3P@4890|Ascomycota,20BRI@147545|Eurotiomycetes,3B0FU@33183|Onygenales,3FTBG@34384|Arthrodermataceae	4751|Fungi	O	Belongs to the Rab GDI family	-	K17255
qsublack_gene_126877	24009	13001.4	75482.6	0.541521	3.14393	5.80573	0.528849	0.0114962	0.00150469	0.821246	0.17917	0.0106594	0.00470698	0.0367184	Au+	1.06e-79	COG0656@1|root,KOG1577@2759|Eukaryota,38HH0@33154|Opisthokonta,3NU9F@4751|Fungi,3QJT4@4890|Ascomycota,20E4C@147545|Eurotiomycetes,3S3BV@5042|Eurotiales	4751|Fungi	S	glycerol dehydrogenase	1.1.1.156,1.1.1.365	K18097,K19634
qsublack_gene_126989	76294.2	48469	137903	0.63529	1.80752	2.84519	0.279861	0.0232306	0.000324753	0.655994	0.192276	0.00350857	0.00267483	0.0276348	Au+	1.65e-202	COG1222@1|root,KOG0652@2759|Eukaryota,38BDY@33154|Opisthokonta,3NV1G@4751|Fungi,3QNKJ@4890|Ascomycota,20DAU@147545|Eurotiomycetes,3S2XM@5042|Eurotiales	4751|Fungi	O	Belongs to the AAA ATPase family	-	K03065
qsublack_gene_127004	509695	254840	926810	0.499985	1.81836	3.63684	0.123005	0.0185434	4.33004e-05	0.458299	0.186069	0.00102315	0.000775052	0.0178661	Au+	0	COG0620@1|root,KOG2263@2759|Eukaryota,38GZS@33154|Opisthokonta,3NW49@4751|Fungi,3QN7P@4890|Ascomycota,20D5V@147545|Eurotiomycetes,3S789@5042|Eurotiales	4751|Fungi	E	5-methyltetrahydropteroyltriglutamate--homocysteine	2.1.1.14	K00549
qsublack_gene_127102	32351	19856.3	68135.3	0.613777	2.10613	3.43142	0.970512	0.0232306	0.000129901	0.990388	0.192276	0.00195787	0.00336545	0.0306998	Au+	2.71e-70	COG0667@1|root,KOG1575@2759|Eukaryota,38GAH@33154|Opisthokonta,3NUBW@4751|Fungi,3QJUN@4890|Ascomycota,20G3C@147545|Eurotiomycetes,3S3C7@5042|Eurotiales	4751|Fungi	C	aldo-keto reductase	-	-
qsublack_gene_127400	901996	484827	1.68893e+06	0.537505	1.87244	3.48358	0.0288056	0.0185434	0.000205677	0.230602	0.186069	0.00258863	0.000701748	0.0178112	Au+	3.07e-47	COG0450@1|root,KOG0854@2759|Eukaryota,38CN4@33154|Opisthokonta,3NW6E@4751|Fungi,3QMF7@4890|Ascomycota,20BB3@147545|Eurotiomycetes,3S4RV@5042|Eurotiales	4751|Fungi	O	Mitochondrial peroxiredoxin PRX1	-	-
qsublack_gene_127576	13430	6751.82	40740.9	0.502741	3.03357	6.03406	0.279861	0.0114962	0.000725281	0.655994	0.17917	0.00633972	0.00264736	0.0275773	Au+	1.18e-121	COG0554@1|root,KOG2517@2759|Eukaryota,39S19@33154|Opisthokonta,3NWD0@4751|Fungi,3QKUX@4890|Ascomycota,20ECT@147545|Eurotiomycetes,3S6G0@5042|Eurotiales	4751|Fungi	G	FGGY-family carbohydrate kinase	-	-
qsublack_gene_127577	11101.5	6329.49	38959.4	0.570148	3.50938	6.15521	0.393048	0.0288056	0.000324753	0.732217	0.203276	0.00350857	0.00352547	0.0316675	Au+	4.92e-208	COG0554@1|root,KOG2517@2759|Eukaryota,39S19@33154|Opisthokonta,3NWD0@4751|Fungi,3QKUX@4890|Ascomycota,20ECT@147545|Eurotiomycetes,3S6G0@5042|Eurotiales	4751|Fungi	G	FGGY-family carbohydrate kinase	-	-
qsublack_gene_127580	74113	38745.9	192935	0.522795	2.60326	4.9795	0.630529	0.00388621	7.57756e-05	0.869797	0.177283	0.00140166	0.000899031	0.0184465	Au+	6.68e-28	COG5657@1|root,KOG1992@2759|Eukaryota,38C02@33154|Opisthokonta,3NVXH@4751|Fungi,3QMKJ@4890|Ascomycota,2132M@147550|Sordariomycetes,1EZB1@1028384|Glomerellales	4751|Fungi	UY	CAS/CSE protein, C-terminus	-	K18423
qsublack_gene_127582	40806	17428.9	121264	0.427116	2.97171	6.95761	0.528849	0.00287947	0.000129901	0.821246	0.177283	0.00195787	0.000870492	0.0182182	Au+	1.8e-265	COG5657@1|root,KOG1992@2759|Eukaryota,38C02@33154|Opisthokonta,3NVXH@4751|Fungi,3QMKJ@4890|Ascomycota,20BUW@147545|Eurotiomycetes,3S4E3@5042|Eurotiales	4751|Fungi	UY	Chromosome segregation protein Cse1	-	K18423
qsublack_gene_127594	83253.4	21583	213203	0.259245	2.56089	9.87827	0.217563	0.0146896	4.33004e-05	0.588496	0.182685	0.00102315	0.000911882	0.0185472	Au+	2.72e-67	COG0154@1|root,KOG1212@2759|Eukaryota,38CWX@33154|Opisthokonta,3NTYP@4751|Fungi,3QPRQ@4890|Ascomycota,20DV9@147545|Eurotiomycetes,3S4ZT@5042|Eurotiales	4751|Fungi	IJT	Acetamidase	3.5.1.4	K01426
qsublack_gene_127595	130114	80678.6	219077	0.620061	1.68373	2.71543	0.0432571	0.0288056	0.000725281	0.279663	0.203276	0.00633972	0.00178837	0.0232678	Au+	1.58e-86	COG0154@1|root,KOG1212@2759|Eukaryota,38CWX@33154|Opisthokonta,3NTYP@4751|Fungi,3QPRQ@4890|Ascomycota,20DV9@147545|Eurotiomycetes,3S4ZT@5042|Eurotiales	4751|Fungi	IJT	Acetamidase	3.5.1.4	K01426
qsublack_gene_128040	26096.2	15340.8	72202.6	0.587855	2.76679	4.70658	0.528849	0.00519604	0.000129901	0.821246	0.177283	0.00195787	0.00115923	0.0201695	Au+	1.34e-42	COG0554@1|root,KOG0728@2759|Eukaryota,38EAQ@33154|Opisthokonta,3NV58@4751|Fungi,3QKB7@4890|Ascomycota,20BSP@147545|Eurotiomycetes,3B2MT@33183|Onygenales,3FKIF@34383|Onygenales incertae sedis	4751|Fungi	O	Belongs to the AAA ATPase family	-	K03066
qsublack_gene_128583	48946.8	12517.3	124109	0.255734	2.53559	9.91498	0.0089307	0.0185434	4.33004e-05	0.140682	0.186069	0.00102315	0.000231641	0.0172216	Au+	7.34e-189	COG1053@1|root,KOG2404@2759|Eukaryota,38FMG@33154|Opisthokonta,3NU5S@4751|Fungi,3QK03@4890|Ascomycota,20KMV@147545|Eurotiomycetes,3SC9M@5042|Eurotiales	4751|Fungi	C	FAD dependent oxidoreductase	-	K18561
qsublack_gene_128605	45883.7	19436.8	93542.2	0.42361	2.03868	4.81264	0.123005	0.0185434	7.57756e-05	0.458299	0.186069	0.00140166	0.000936929	0.0187756	Au+	5.95e-270	COG2303@1|root,KOG1238@2759|Eukaryota,38UEK@33154|Opisthokonta,3NW9R@4751|Fungi,3QQIA@4890|Ascomycota,20ACT@147545|Eurotiomycetes,3S7AP@5042|Eurotiales	4751|Fungi	E	GMC oxidoreductase	-	-
qsublack_gene_128685	15384.2	6273.14	40974.6	0.407765	2.66342	6.53175	0.075256	0.035463	0.00208924	0.366523	0.214861	0.0138998	0.00422348	0.0345279	Au+	4.89e-21	COG0351@1|root,KOG2598@2759|Eukaryota,38DYW@33154|Opisthokonta,3NYCI@4751|Fungi,3QPCU@4890|Ascomycota,217V7@147550|Sordariomycetes,3TJQ4@5125|Hypocreales	4751|Fungi	HK	thiamin biosynthesis protein Thi-4	2.7.1.49,2.7.4.7,3.5.99.2	K00877
qsublack_gene_129443	38204	18443.3	106988	0.482759	2.80045	5.80092	0.314999	0.00208924	2.16502e-05	0.689797	0.177283	0.000724144	0.000349153	0.0172216	Au+	1.14e-64	COG0031@1|root,KOG1252@2759|Eukaryota,38B7H@33154|Opisthokonta,3NV6E@4751|Fungi,3QJBM@4890|Ascomycota,20E6K@147545|Eurotiomycetes,3S2SF@5042|Eurotiales	4751|Fungi	E	Belongs to the cysteine synthase cystathionine beta- synthase family	4.2.1.22	K01697
qsublack_gene_129545	17689	6828.85	70228.5	0.386051	3.97019	10.2841	0.0524259	0.0630128	0.00519604	0.309444	0.262853	0.0276405	0.00758722	0.0482842	Au+	1.29e-73	COG1022@1|root,KOG1180@2759|Eukaryota,39R6J@33154|Opisthokonta,3NVN8@4751|Fungi,3QNH5@4890|Ascomycota,20CHC@147545|Eurotiomycetes,3S4BR@5042|Eurotiales	4751|Fungi	I	Fatty acid activator Faa4	6.2.1.3	K01897
qsublack_gene_129546	33064.6	8966.91	129054	0.271193	3.90308	14.3922	0.853428	0.00287947	0.000205677	0.959386	0.177283	0.00258863	0.00120498	0.0202693	Au+	1.92e-66	COG1022@1|root,KOG1180@2759|Eukaryota,39R6J@33154|Opisthokonta,3NVN8@4751|Fungi,3QNH5@4890|Ascomycota,20CHC@147545|Eurotiomycetes,3S4BR@5042|Eurotiales	4751|Fungi	I	Fatty acid activator Faa4	6.2.1.3	K01897
qsublack_gene_129547	22315.7	8227.41	84176.8	0.368683	3.77209	10.2313	0.314999	0.0146896	0.00287947	0.689797	0.182685	0.0177096	0.00600695	0.0419856	Au+	4.04e-219	COG1022@1|root,KOG1180@2759|Eukaryota,39R6J@33154|Opisthokonta,3NVN8@4751|Fungi,3QNH5@4890|Ascomycota,20CHC@147545|Eurotiomycetes,3S4BR@5042|Eurotiales	4751|Fungi	I	Fatty acid activator Faa4	6.2.1.3	K01897
qsublack_gene_129615	30606.3	8251.68	81220.8	0.269607	2.65372	9.84294	0.165494	0.0630128	0.000129901	0.527292	0.262853	0.00195787	0.00247556	0.0267455	Au+	1.8e-27	COG3508@1|root,KOG1417@2759|Eukaryota,38B92@33154|Opisthokonta,3NY70@4751|Fungi,3QRY5@4890|Ascomycota	4751|Fungi	E	Homogentisate 1,2-dioxygenase	1.13.11.5	K00451
qsublack_gene_129801	311523	134672	435829	0.432302	1.39903	3.23623	0.0146896	0.314999	0.000129901	0.169987	0.599784	0.00195787	0.00156985	0.0221138	Au+	1.32e-129	COG0055@1|root,KOG1350@2759|Eukaryota,38CQ6@33154|Opisthokonta,3NVU5@4751|Fungi,3QPGY@4890|Ascomycota,20DV6@147545|Eurotiomycetes,3B0BQ@33183|Onygenales,3FM8D@34383|Onygenales incertae sedis	4751|Fungi	C	Produces ATP from ADP in the presence of a proton gradient across the membrane	2.4.1.18,3.6.3.14	K00700,K02133
qsublack_gene_130114	48102.8	18651.9	183957	0.387752	3.82425	9.86263	0.853428	0.00684146	0.00287947	0.959386	0.177283	0.0177096	0.0057417	0.0408591	Au+	9.58e-32	COG1249@1|root,KOG0405@2759|Eukaryota,39J8D@33154|Opisthokonta,3NVN5@4751|Fungi,3QPCN@4890|Ascomycota,2150W@147550|Sordariomycetes,3TGYQ@5125|Hypocreales	4751|Fungi	Q	Belongs to the class-I pyridine nucleotide-disulfide oxidoreductase family	1.8.1.7	K00383
qsublack_gene_130117	62208	23787.8	166803	0.382392	2.68137	7.0121	0.314999	0.00519604	2.16502e-05	0.689797	0.177283	0.000724144	0.000534492	0.0172216	Au+	2.16e-11	COG1249@1|root,KOG0405@2759|Eukaryota,39J8D@33154|Opisthokonta,3BDB0@33208|Metazoa,3D06N@33213|Bilateria	33208|Metazoa	Q	glutathione-disulfide reductase activity	1.8.1.7	K00383
qsuwhite_gene_6570	30432.6	166021	105587	5.45537	3.46955	0.635987	2.16502e-05	0.075256	0.123005	0.0132156	0.283857	0.341035	0.00135336	0.0211662	Su+	1.24e-34	COG0443@1|root,KOG0102@2759|Eukaryota,38EJA@33154|Opisthokonta,3BABY@33208|Metazoa,3CT5K@33213|Bilateria,48BEX@7711|Chordata,48XVF@7742|Vertebrata	33208|Metazoa	O	negative regulation of hematopoietic stem cell differentiation	-	K04043
qsuwhite_gene_10108	61135.2	40429.6	157648	0.661315	2.57868	3.89932	0.279861	0.00208924	0.000129901	0.655994	0.177283	0.00195787	0.000591086	0.0172216	Au+	7.36e-159	COG0508@1|root,KOG0558@2759|Eukaryota,38CZZ@33154|Opisthokonta,3NWU1@4751|Fungi,3QNFE@4890|Ascomycota,20AGV@147545|Eurotiomycetes,3S6UJ@5042|Eurotiales	4751|Fungi	I	Dihydrolipoamide acetyltransferase component of pyruvate dehydrogenase complex	2.3.1.168	K09699
qsuwhite_gene_13424	10903.7	5318.85	44859.6	0.487801	4.11415	8.43407	0.0146896	0.0146896	0.000725281	0.169987	0.182685	0.00633972	0.000853806	0.0180413	Au+	2.19e-118	COG5075@1|root,KOG3969@2759|Eukaryota,38BBX@33154|Opisthokonta,3NX8D@4751|Fungi,3QM13@4890|Ascomycota,20ADM@147545|Eurotiomycetes,3S4IH@5042|Eurotiales	4751|Fungi	S	MRNA decapping hydrolase	3.6.1.59	K12584
qsuwhite_gene_22218	78321.6	21515	221502	0.274701	2.82811	10.2952	0.075256	0.00684146	7.57756e-05	0.366523	0.177283	0.00140166	0.000467371	0.0172216	Au+	1.94e-104	COG0339@1|root,KOG2089@2759|Eukaryota,38SFI@33154|Opisthokonta,3NX1E@4751|Fungi,3QJCH@4890|Ascomycota,20BAI@147545|Eurotiomycetes,3S3SR@5042|Eurotiales	4751|Fungi	O	Peptidase family M3	3.4.24.37	K01405,K13726
qsuwhite_gene_23542	99142.9	46184.5	244574	0.465838	2.46688	5.29557	0.0630128	0.00208924	2.16502e-05	0.339389	0.177283	0.000724144	0.000174169	0.0172216	Au+	5.39e-189	COG0114@1|root,COG0657@1|root,KOG1317@2759|Eukaryota,KOG1515@2759|Eukaryota,38GHX@33154|Opisthokonta,3NTY2@4751|Fungi,3QMAA@4890|Ascomycota,20DMH@147545|Eurotiomycetes,3S5GB@5042|Eurotiales	4751|Fungi	C	Fumarate hydratase	4.2.1.2	K01679
qsuwhite_gene_23970	59444.7	27095.1	134409	0.455804	2.26107	4.96062	0.314999	0.0432571	0.000205677	0.689797	0.228284	0.00258863	0.00334812	0.030618	Au+	1.44e-272	COG0124@1|root,KOG1936@2759|Eukaryota,38DB2@33154|Opisthokonta,3NVF4@4751|Fungi,3QPJI@4890|Ascomycota,20DRE@147545|Eurotiomycetes,3S5MQ@5042|Eurotiales	4751|Fungi	J	Histidyl-tRNA synthetase, mitochondrial	6.1.1.21	K01892
qsuwhite_gene_23985	206067	95124.2	479721	0.461618	2.32799	5.0431	0.190316	0.0232306	1.08251e-05	0.555404	0.192276	0.000574593	0.000742742	0.0178661	Au+	5.84e-202	COG0492@1|root,KOG0404@2759|Eukaryota,38I0K@33154|Opisthokonta,3NW0C@4751|Fungi,3QKA3@4890|Ascomycota,20EIP@147545|Eurotiomycetes,3S814@5042|Eurotiales	4751|Fungi	O	Belongs to the class-II pyridine nucleotide-disulfide oxidoreductase family	1.6.5.5,1.8.1.9	K00344,K00384
qsuwhite_gene_24457	628849	327290	1.1749e+06	0.520458	1.86833	3.58978	0.217563	0.075256	0.00105003	0.588496	0.283857	0.00838767	0.00724284	0.0470752	Au+	8.42e-211	COG0183@1|root,KOG1390@2759|Eukaryota,38C4X@33154|Opisthokonta,3NV1W@4751|Fungi,3QNFF@4890|Ascomycota,20C6W@147545|Eurotiomycetes,3S3GH@5042|Eurotiales	4751|Fungi	I	Belongs to the thiolase family	2.3.1.9	K00626
qsuwhite_gene_25750	147347	44892.1	408173	0.304669	2.77014	9.0923	0.630529	0.0185434	0.000487129	0.869797	0.186069	0.00477035	0.0040162	0.0338535	Au+	1.36e-187	COG0075@1|root,KOG2862@2759|Eukaryota,38BJD@33154|Opisthokonta,3NW05@4751|Fungi,3QKBN@4890|Ascomycota,20BPC@147545|Eurotiomycetes,3S82C@5042|Eurotiales	4751|Fungi	E	Aminotransferase class V	2.6.1.44,2.6.1.45,2.6.1.51	K00830
qsuwhite_gene_30332	29174.2	8147.7	59893.2	0.279277	2.05295	7.35093	0.075256	0.0288056	2.16502e-05	0.366523	0.203276	0.000724144	0.000624003	0.0172216	Au+	5.1e-250	COG1034@1|root,KOG2282@2759|Eukaryota,38DHR@33154|Opisthokonta,3NW5Z@4751|Fungi,1GSKY@112252|Fungi incertae sedis	4751|Fungi	C	NADH-ubiquinone oxidoreductase-G iron-sulfur binding region	1.6.5.3,1.6.99.3	K03934
qsuwhite_gene_31254	17685	7721.53	94794.5	0.436616	5.36017	12.2766	0.578742	0.00519604	0.00150469	0.846164	0.177283	0.0106594	0.00328395	0.0305272	Au+	0	COG5096@1|root,KOG1058@2759|Eukaryota,38E3K@33154|Opisthokonta,3NU7Q@4751|Fungi,3QK7X@4890|Ascomycota,20B1I@147545|Eurotiomycetes,3S4HV@5042|Eurotiales	4751|Fungi	U	The coatomer is a cytosolic protein complex that binds to dilysine motifs and reversibly associates with Golgi non- clathrin-coated vesicles, which further mediate biosynthetic protein transport from the ER, via the Golgi up to the trans Golgi network. Coatomer complex is required for budding from Golgi membranes, and is essential for the retrograde Golgi-to-ER transport of dilysine-tagged protei…	-	K17301
qsuwhite_gene_34972	23722	7363.09	107314	0.310391	4.5238	14.5745	0.0892096	0.0288056	0.000324753	0.396036	0.203276	0.00350857	0.00173384	0.0230199	Au+	0	COG1525@1|root,KOG2039@2759|Eukaryota,38HTP@33154|Opisthokonta,3NVE3@4751|Fungi,3QP50@4890|Ascomycota,20CKK@147545|Eurotiomycetes,3S84N@5042|Eurotiales	4751|Fungi	K	Transcription factor (Snd1 p100)	-	K15979
qsuwhite_gene_34976	564256	351219	1.17514e+06	0.622446	2.08263	3.34589	0.314999	0.0432571	0.000725281	0.689797	0.228284	0.00633972	0.00549525	0.0399056	Au+	1.71e-37	COG0176@1|root,KOG2772@2759|Eukaryota,38BFF@33154|Opisthokonta,3NUE1@4751|Fungi,3QK4H@4890|Ascomycota,20B8X@147545|Eurotiomycetes,3S656@5042|Eurotiales	4751|Fungi	H	Transaldolase is important for the balance of metabolites in the pentose-phosphate pathway	2.2.1.2	K00616
qsuwhite_gene_39666	268042	102036	665297	0.38067	2.48206	6.52025	0.435872	0.0146896	1.08251e-05	0.762178	0.182685	0.000574593	0.000890947	0.0184465	Au+	2.08e-190	COG0059@1|root,2QQBF@2759|Eukaryota,38GR1@33154|Opisthokonta,3NVDN@4751|Fungi,3QMYC@4890|Ascomycota,20F3T@147545|Eurotiomycetes,3S2TG@5042|Eurotiales	4751|Fungi	E	Ketol-acid reductoisomerase	1.1.1.86	K00053
qsuwhite_gene_43652	179384	42451.2	243903	0.23665	1.35967	5.7455	0.00287947	0.352681	0.000129901	0.109855	0.637402	0.00195787	0.000745623	0.0178661	Au+	6.58e-45	COG2303@1|root,KOG1238@2759|Eukaryota,38B8Z@33154|Opisthokonta,3NXIY@4751|Fungi,3QKFY@4890|Ascomycota,20EGJ@147545|Eurotiomycetes	4751|Fungi	E	alcohol oxidase	1.1.3.13	K17066
qsuwhite_gene_44283	452197	231569	821139	0.512097	1.81589	3.54598	0.0630128	0.035463	1.08251e-05	0.339389	0.214861	0.000574593	0.000520875	0.0172216	Au+	4.28e-21	COG0049@1|root,KOG3291@2759|Eukaryota,38GCC@33154|Opisthokonta,3NVCP@4751|Fungi,3QNER@4890|Ascomycota,20FQV@147545|Eurotiomycetes	4751|Fungi	J	Belongs to the universal ribosomal protein uS7 family	-	K02989
qsuwhite_gene_44798	22891.4	9986.71	63993.5	0.436264	2.79552	6.40787	0.075256	0.00684146	1.08251e-05	0.366523	0.177283	0.000574593	0.000255508	0.0172216	Au+	9.51e-234	COG1053@1|root,COG5274@1|root,KOG0537@2759|Eukaryota,KOG2404@2759|Eukaryota,38FMG@33154|Opisthokonta,3NU5S@4751|Fungi,1GS8H@112252|Fungi incertae sedis	4751|Fungi	C	FAD binding domain	-	K18561
qsuwhite_gene_51067	19987.9	6897.87	64391.8	0.345102	3.22154	9.33503	0.190316	0.00388621	2.16502e-05	0.555404	0.177283	0.000724144	0.000370504	0.0172216	Au+	1.17e-218	COG0143@1|root,KOG2241@2759|Eukaryota,38C9W@33154|Opisthokonta,3P07W@4751|Fungi,3QMUQ@4890|Ascomycota,20EP9@147545|Eurotiomycetes,3S7XW@5042|Eurotiales	4751|Fungi	J	Cofactor for methionyl-and glutamyl-tRNA	-	K15437
qsuwhite_gene_51078	65172.5	17750	182960	0.272354	2.80732	10.3076	0.393048	0.0114962	4.33004e-05	0.732217	0.17917	0.00102315	0.0010701	0.0197444	Au+	1.26e-261	COG0442@1|root,KOG4163@2759|Eukaryota,39QW5@33154|Opisthokonta,3NWAQ@4751|Fungi,3QNQG@4890|Ascomycota,20CEQ@147545|Eurotiomycetes,3S4B2@5042|Eurotiales	4751|Fungi	J	Prolyl-tRNA synthetase	6.1.1.15	K01881
qsuwhite_gene_51097	22781.1	6077.45	90650.6	0.266776	3.9792	14.9159	0.035463	0.0185434	0.00150469	0.255676	0.186069	0.0106594	0.00194734	0.0242178	Au+	1.64e-61	COG5064@1|root,KOG0166@2759|Eukaryota,38CKN@33154|Opisthokonta,3NU5E@4751|Fungi,3QM4Y@4890|Ascomycota,20DH0@147545|Eurotiomycetes,3S7RR@5042|Eurotiales	4751|Fungi	U	Belongs to the importin alpha family	-	-
qsuwhite_gene_51159	38298.3	10200.5	138849	0.266343	3.62545	13.612	0.314999	0.0114962	0.00150469	0.689797	0.17917	0.0106594	0.00387869	0.0333467	Au+	1.01e-211	COG5159@1|root,KOG1463@2759|Eukaryota,38GDJ@33154|Opisthokonta,3NU6M@4751|Fungi,3QJG8@4890|Ascomycota,20EG6@147545|Eurotiomycetes,3S3BQ@5042|Eurotiales	4751|Fungi	O	Proteasome regulatory particle subunit (RpnF)	-	K03036
qsuwhite_gene_54285	72450.2	21662.6	161901	0.299	2.23466	7.47377	0.217563	0.0524259	2.16502e-05	0.588496	0.245851	0.000724144	0.0015161	0.021991	Au+	1.16e-80	COG1390@1|root,KOG1664@2759|Eukaryota,38FW0@33154|Opisthokonta,3NXSD@4751|Fungi,3QPPF@4890|Ascomycota,20FYW@147545|Eurotiomycetes,3S3BB@5042|Eurotiales	4751|Fungi	C	ATP synthase subunit E	-	K02150
qsuwhite_gene_55391	1.08891e+06	673601	2.3188e+06	0.618602	2.12947	3.44239	0.190316	0.0089307	7.57756e-05	0.555404	0.177283	0.00140166	0.000805642	0.0179228	Au+	6.35e-283	COG1048@1|root,KOG0453@2759|Eukaryota,38CNX@33154|Opisthokonta,3NV17@4751|Fungi,3QM32@4890|Ascomycota,20C55@147545|Eurotiomycetes,3AZGS@33183|Onygenales,3FKIV@34383|Onygenales incertae sedis	4751|Fungi	C	Belongs to the aconitase IPM isomerase family	4.2.1.3	K01681
qsuwhite_gene_56029	10760.6	7088.43	46897	0.658738	4.3582	6.61599	0.795936	0.00287947	0.000725281	0.941727	0.177283	0.00633972	0.00203205	0.0247255	Au+	0	COG0464@1|root,KOG0741@2759|Eukaryota,38CBE@33154|Opisthokonta,3NV43@4751|Fungi,3QKQE@4890|Ascomycota,20CAU@147545|Eurotiomycetes,3S59B@5042|Eurotiales	4751|Fungi	O	Vesicular fusion ATPase	3.6.4.6	K06027
qsuwhite_gene_56336	80002.4	30234.4	89330.4	0.377918	1.1166	2.9546	0.00519604	0.684211	0.00105003	0.121601	0.856286	0.00838767	0.00293524	0.0290842	Au+	2.58e-103	COG0638@1|root,KOG0176@2759|Eukaryota,38CVS@33154|Opisthokonta,3NWYW@4751|Fungi,3QJKC@4890|Ascomycota,20BVW@147545|Eurotiomycetes,3S7BQ@5042|Eurotiales	4751|Fungi	O	Proteasome subunit alpha type	3.4.25.1	K02729
qsuwhite_gene_56627	62581.3	23759.4	125809	0.379657	2.01032	5.29511	0.217563	0.00519604	1.08251e-05	0.588496	0.177283	0.000574593	0.000370504	0.0172216	Au+	0	COG0488@1|root,KOG1242@1|root,KOG0062@2759|Eukaryota,KOG1242@2759|Eukaryota,38GJ3@33154|Opisthokonta,3NWIQ@4751|Fungi,3QJH9@4890|Ascomycota,20EC3@147545|Eurotiomycetes,3S46P@5042|Eurotiales	4751|Fungi	EJ	Elongation factor	-	K03235
qsuwhite_gene_56875	151859	63292.3	276999	0.416784	1.82406	4.3765	0.0288056	0.0232306	0.000205677	0.230602	0.192276	0.00258863	0.000775052	0.0178661	Au+	1.48e-85	KOG2536@1|root,KOG2536@2759|Eukaryota,3A27E@33154|Opisthokonta,3P2ZN@4751|Fungi,3QRMH@4890|Ascomycota,20DJS@147545|Eurotiomycetes,3S6Z0@5042|Eurotiales	4751|Fungi	C	Regulatory protein SUAPRGA1	-	K15414
qsuwhite_gene_61061	72023.6	21831.9	175283	0.303121	2.43369	8.02875	0.0185434	0.0146896	0.000205677	0.188391	0.182685	0.00258863	0.000524923	0.0172216	Au+	4.15e-264	COG0624@1|root,KOG2276@2759|Eukaryota,38D4S@33154|Opisthokonta,3NVKQ@4751|Fungi,3QQ5I@4890|Ascomycota,20ACQ@147545|Eurotiomycetes,3S4MB@5042|Eurotiales	4751|Fungi	E	Glutamate carboxypeptidase	-	K15428
qsuwhite_gene_73390	18730.2	10585.4	54541.1	0.565153	2.91194	5.15247	0.630529	0.0146896	0.00150469	0.869797	0.182685	0.0106594	0.00566809	0.040625	Au+	7.62e-73	COG5040@1|root,KOG0841@2759|Eukaryota,38CKG@33154|Opisthokonta,3NU75@4751|Fungi,3QQ0I@4890|Ascomycota,3RT62@4891|Saccharomycetes	4751|Fungi	O	Belongs to the 14-3-3 family	-	K06630
qsuwhite_gene_77228	167682	86930.1	335374	0.518424	2.00007	3.85798	0.0892096	0.00519604	1.08251e-05	0.396036	0.177283	0.000574593	0.00024391	0.0172216	Au+	4.37e-174	COG1960@1|root,KOG0139@2759|Eukaryota,38H6J@33154|Opisthokonta,3NWK6@4751|Fungi,3QQB9@4890|Ascomycota,20DZF@147545|Eurotiomycetes,3S627@5042|Eurotiales	4751|Fungi	E	acyl-CoA dehydrogenase	-	-
qsuwhite_gene_78942	89533.2	29751.3	198567	0.332294	2.2178	6.67422	0.0892096	0.0185434	2.16502e-05	0.396036	0.186069	0.000724144	0.000544938	0.0172216	Au+	2.97e-233	COG1304@1|root,COG5274@1|root,KOG0537@2759|Eukaryota,KOG0538@2759|Eukaryota,38BCT@33154|Opisthokonta,3NTYS@4751|Fungi,3QMI4@4890|Ascomycota,20F48@147545|Eurotiomycetes,3S5G0@5042|Eurotiales	4751|Fungi	C	Belongs to the cytochrome b5 family	1.1.2.3	K00101
qsuwhite_gene_83115	76826.6	38614.6	166133	0.50262	2.16245	4.30235	0.165494	0.0089307	4.33004e-05	0.527292	0.177283	0.00102315	0.000624003	0.0172216	Au+	6.67e-17	KOG0118@1|root,KOG0118@2759|Eukaryota,38I3K@33154|Opisthokonta,3NZQ5@4751|Fungi,3QMAU@4890|Ascomycota,20BRV@147545|Eurotiomycetes,3B1E1@33183|Onygenales,3FU89@34384|Arthrodermataceae	4751|Fungi	A	RNA recognition motif	-	-
qsuwhite_gene_90120	155079	63354	518513	0.408529	3.34355	8.18438	1	0.00388621	0.00105003	1	0.177283	0.00838767	0.00275896	0.0280436	Au+	1.54999999986991e-314	COG0464@1|root,KOG0730@2759|Eukaryota,38BWW@33154|Opisthokonta,3NWIH@4751|Fungi,3QM44@4890|Ascomycota,20AMQ@147545|Eurotiomycetes,3S7KE@5042|Eurotiales	4751|Fungi	O	Belongs to the AAA ATPase family	-	K13525
qsuwhite_gene_91854	45285.3	11334.7	163055	0.250297	3.60062	14.3854	0.481251	0.0146896	0.00287947	0.791994	0.182685	0.0177096	0.00701293	0.0460896	Au+	0	COG1038@1|root,KOG0369@2759|Eukaryota,39RBB@33154|Opisthokonta,3NW8J@4751|Fungi,3QPPS@4890|Ascomycota,20E8Z@147545|Eurotiomycetes,3S4SC@5042|Eurotiales	4751|Fungi	C	Catalyzes a 2-step reaction, involving the ATP-dependent carboxylation of the covalently attached biotin in the first step and the transfer of the carboxyl group to pyruvate in the second	6.4.1.1	K01958
qsuwhite_gene_91857	31817	18359.9	60038	0.577047	1.88698	3.27005	0.435872	0.0089307	0.00287947	0.762178	0.177283	0.0177096	0.00532768	0.0393797	Au+	0	KOG0985@1|root,KOG0985@2759|Eukaryota,38CNM@33154|Opisthokonta,3NWB5@4751|Fungi,3QKI6@4890|Ascomycota,20AWE@147545|Eurotiomycetes,3S6Z5@5042|Eurotiales	4751|Fungi	U	Clathrin is the major protein of the polyhedral coat of coated pits and vesicles	-	K04646
qsuwhite_gene_96637	12245.4	7294.62	33626.5	0.595703	2.74605	4.60977	0.0892096	0.0232306	0.00150469	0.396036	0.192276	0.0106594	0.00317151	0.0299759	Au+	1.93e-154	COG5657@1|root,KOG2274@2759|Eukaryota,38BE2@33154|Opisthokonta,3NYWN@4751|Fungi,3QM71@4890|Ascomycota,20F5U@147545|Eurotiomycetes,3S62P@5042|Eurotiales	4751|Fungi	UY	Importin beta-5 subunit	-	K20224
qsuwhite_gene_99826	31303.4	11618.2	87722.7	0.371147	2.80234	7.55049	0.14314	0.0288056	0.00150469	0.497156	0.203276	0.0106594	0.00431158	0.0348206	Au+	0	COG1003@1|root,KOG2040@2759|Eukaryota,38E0D@33154|Opisthokonta,3NWQC@4751|Fungi,3QJE3@4890|Ascomycota,20ENQ@147545|Eurotiomycetes,3S5AE@5042|Eurotiales	4751|Fungi	E	The glycine cleavage system catalyzes the degradation of glycine	1.4.4.2	K00281
qsuwhite_gene_103112	142859	65211.6	286396	0.456476	2.00475	4.3918	0.0630128	0.0432571	0.000725281	0.339389	0.228284	0.00633972	0.00255342	0.0269507	Au+	2.12e-70	COG1249@1|root,KOG1335@2759|Eukaryota,38CSR@33154|Opisthokonta,3NXXS@4751|Fungi,3QK5N@4890|Ascomycota,20EBZ@147545|Eurotiomycetes,3S4GN@5042|Eurotiales	4751|Fungi	C	Dihydrolipoyl dehydrogenase	1.8.1.4	K00382,K17583
qsuwhite_gene_103127	68971.1	28233.7	179019	0.409356	2.59556	6.3406	0.123005	0.00519604	4.33004e-05	0.458299	0.177283	0.00102315	0.000422622	0.0172216	Au+	1.01e-252	COG2030@1|root,KOG1206@2759|Eukaryota,38D3K@33154|Opisthokonta,3NV6Q@4751|Fungi,3QN9A@4890|Ascomycota,20BK8@147545|Eurotiomycetes,3S5RS@5042|Eurotiales	4751|Fungi	Q	Peroxisomal multifunctional beta-oxidation protein	-	K14729
qsuwhite_gene_104708	137200	54179.5	264920	0.394894	1.9309	4.88968	0.0892096	0.0524259	0.000129901	0.396036	0.245851	0.00195787	0.00162551	0.0223813	Au+	2.11e-81	COG0074@1|root,KOG1255@2759|Eukaryota,38DG1@33154|Opisthokonta,3BA6W@33208|Metazoa,3CRD6@33213|Bilateria,41V7Y@6656|Arthropoda,3SGT9@50557|Insecta,44ZYS@7147|Diptera,45T3F@7214|Drosophilidae	33208|Metazoa	H	Succinyl-CoA synthetase functions in the citric acid cycle (TCA), coupling the hydrolysis of succinyl-CoA to the synthesis of either ATP or GTP and thus represents the only step of substrate-level phosphorylation in the TCA. The alpha subunit of the enzyme binds the substrates coenzyme A and phosphate, while succinate binding and specificity for either ATP or GTP is provided by different beta sub…	6.2.1.4,6.2.1.5	K01899
qsuwhite_gene_107520	105784	49725.5	245107	0.470068	2.31706	4.9292	0.123005	0.0089307	7.57756e-05	0.458299	0.177283	0.00140166	0.000658753	0.0173226	Au+	6.54e-55	COG2513@1|root,KOG1260@2759|Eukaryota,38CWA@33154|Opisthokonta,3NU9G@4751|Fungi,3QMNU@4890|Ascomycota,213N5@147550|Sordariomycetes,1EVA7@1028384|Glomerellales	4751|Fungi	C	Belongs to the isocitrate lyase PEP mutase superfamily. Isocitrate lyase family	4.1.3.1	K01637
qsuwhite_gene_111427	10769.9	7042.38	31690.3	0.653894	2.94248	4.49993	0.739364	0.0232306	0.00150469	0.920279	0.192276	0.0106594	0.00766594	0.0485333	Au+	4.63e-165	COG4225@1|root,2QT25@2759|Eukaryota,3983X@33154|Opisthokonta,3NWXE@4751|Fungi,3QNQH@4890|Ascomycota,20AMW@147545|Eurotiomycetes,3MVV4@451870|Chaetothyriomycetidae	4751|Fungi	E	Glycosyl Hydrolase Family 88	3.2.1.172	K15532
qsuwhite_gene_112859	182512	74069.6	448099	0.405834	2.45517	6.0497	0.247451	0.0232306	2.16502e-05	0.622878	0.192276	0.000724144	0.00102947	0.0193855	Au+	2.26e-167	COG0183@1|root,KOG1389@2759|Eukaryota,38F89@33154|Opisthokonta,3NUEC@4751|Fungi,3QKZ9@4890|Ascomycota,20BK5@147545|Eurotiomycetes,3S2WV@5042|Eurotiales	4751|Fungi	I	Belongs to the thiolase family	2.3.1.16	K07513
qsuwhite_gene_117297	535959	306970	1.19176e+06	0.572749	2.22361	3.88235	0.190316	0.0288056	0.00105003	0.555404	0.203276	0.00838767	0.00414787	0.034448	Au+	7.99e-30	COG0383@1|root,KOG4342@2759|Eukaryota,38EQ8@33154|Opisthokonta,3BDUC@33208|Metazoa,3CZPD@33213|Bilateria,48A3W@7711|Chordata,48WH1@7742|Vertebrata,49WUG@7898|Actinopterygii	33208|Metazoa	G	Mannosidase, alpha, class 2C, member 1	3.2.1.24	K01191
qsuwhite_gene_125436	8732.42	5432.3	14910.3	0.622084	1.70747	2.74475	0.105122	0.279861	7.57756e-05	0.428982	0.564889	0.00140166	0.00376042	0.0325207	Au+	6.63e-44	COG1960@1|root,KOG0141@2759|Eukaryota,39SMT@33154|Opisthokonta,3NZXF@4751|Fungi,3QPTF@4890|Ascomycota,20AYK@147545|Eurotiomycetes,3S7QB@5042|Eurotiales	4751|Fungi	E	acyl-CoA dehydrogenase	-	K15389
qsuwhite_gene_125491	326011	119015	604585	0.365065	1.85449	5.07988	0.00684146	0.0288056	1.08251e-05	0.131532	0.203276	0.000574593	0.000164769	0.0172216	Au+	5.74e-50	COG1100@1|root,KOG0070@2759|Eukaryota,38BDM@33154|Opisthokonta,3NVWA@4751|Fungi,3QM2K@4890|Ascomycota,20FDP@147545|Eurotiomycetes,3S502@5042|Eurotiales	4751|Fungi	U	Belongs to the small GTPase superfamily. Arf family	-	K07937,K07977
qsuwhite_gene_125499	24500.4	11850.2	67777.6	0.483673	2.76639	5.71955	0.247451	0.0114962	0.00150469	0.622878	0.17917	0.0106594	0.00352547	0.0316675	Au+	5.66e-31	COG0081@1|root,KOG1570@2759|Eukaryota,38FV6@33154|Opisthokonta,3NUHC@4751|Fungi,3QJR2@4890|Ascomycota,20AXD@147545|Eurotiomycetes,3B2TR@33183|Onygenales,3FMHU@34383|Onygenales incertae sedis	4751|Fungi	J	Belongs to the universal ribosomal protein uL1 family	-	K02865
qsuwhite_gene_126519	65315.5	28372.8	123987	0.434396	1.89828	4.36993	0.0432571	0.075256	0.00208924	0.279663	0.283857	0.0138998	0.00462271	0.0365279	Au+	9.17e-196	COG0010@1|root,KOG2964@2759|Eukaryota,38BX2@33154|Opisthokonta,3NUEG@4751|Fungi,3QQPT@4890|Ascomycota,20AXM@147545|Eurotiomycetes,3S45R@5042|Eurotiales	4751|Fungi	G	Belongs to the arginase family	3.5.3.11	K01480
qsuwhite_gene_141825	650296	438051	1.44177e+06	0.673617	2.2171	3.29134	0.217563	0.00105003	7.57756e-05	0.588496	0.177283	0.00140166	0.000332018	0.0172216	Au+	9.18e-71	KOG0749@1|root,KOG0749@2759|Eukaryota,38B82@33154|Opisthokonta,3NWSK@4751|Fungi,1GWQJ@112252|Fungi incertae sedis	4751|Fungi	C	Mitochondrial carrier protein	-	K05863
qsuwhite_gene_150304	69134.6	32131	146220	0.464761	2.115	4.55073	0.528849	0.0524259	0.000725281	0.821246	0.245851	0.00633972	0.00784607	0.0494387	Au+	4.16e-129	2CMDX@1|root,2QQ2V@2759|Eukaryota,38F57@33154|Opisthokonta,3NXGA@4751|Fungi,3QM6J@4890|Ascomycota,20D4Y@147545|Eurotiomycetes,3S6DV@5042|Eurotiales	4751|Fungi	S	BAR domain protein	-	-
qsuwhite_gene_151465	10101.7	5761.99	34551	0.570399	3.42033	5.99637	0.435872	0.0146896	0.000324753	0.762178	0.182685	0.00350857	0.00257326	0.0270433	Au+	7.56e-250	COG0488@1|root,KOG0927@2759|Eukaryota,38D7Z@33154|Opisthokonta,3NUDQ@4751|Fungi,3QM35@4890|Ascomycota,20EQG@147545|Eurotiomycetes,3S2WZ@5042|Eurotiales	4751|Fungi	S	ABC transporter	-	K06185
qsuwhite_gene_165703	72761.9	40080.4	185312	0.550843	2.54683	4.62352	0.352681	0.0146896	0.000129901	0.716613	0.182685	0.00195787	0.00165514	0.0225351	Au+	1.14e-213	COG0459@1|root,KOG0361@2759|Eukaryota,38FBW@33154|Opisthokonta,3NVKZ@4751|Fungi,1GRWS@112252|Fungi incertae sedis	4751|Fungi	O	T-complex protein 1 subunit eta	-	K09499
qsuwhite_gene_166233	9619.5	7324.77	43323	0.761449	4.50366	5.91459	0.435872	0.00684146	0.00388621	0.762178	0.177283	0.0222394	0.00550235	0.0399056	Au+	0	KOG2072@1|root,KOG2072@2759|Eukaryota,38DM9@33154|Opisthokonta,3NU0R@4751|Fungi,3QMM1@4890|Ascomycota,20E6P@147545|Eurotiomycetes,3S4CJ@5042|Eurotiales	4751|Fungi	J	RNA-binding component of the eukaryotic translation initiation factor 3 (eIF-3) complex, which is involved in protein synthesis of a specialized repertoire of mRNAs and, together with other initiation factors, stimulates binding of mRNA and methionyl-tRNAi to the 40S ribosome. The eIF-3 complex specifically targets and initiates translation of a subset of mRNAs involved in cell proliferation	-	K03254
qsuwhite_gene_169249	727593	433944	1.01618e+06	0.59641	1.39663	2.34173	0.035463	0.190316	0.000205677	0.255676	0.459935	0.00258863	0.00232688	0.0261417	Au+	4.48e-118	COG0039@1|root,KOG1494@2759|Eukaryota,38EX2@33154|Opisthokonta,3NWAG@4751|Fungi,3QNKB@4890|Ascomycota,20BBT@147545|Eurotiomycetes,3S61Q@5042|Eurotiales	4751|Fungi	C	Malate dehydrogenase	1.1.1.37	K00026
qsuwhite_gene_178803	27125.3	10583.4	74699	0.390166	2.75385	7.05815	0.578742	0.00388621	1.08251e-05	0.846164	0.177283	0.000574593	0.000502392	0.0172216	Au+	0	COG0331@1|root,2QQJX@2759|Eukaryota,38EJX@33154|Opisthokonta,3NV76@4751|Fungi,3QMNX@4890|Ascomycota,20B6S@147545|Eurotiomycetes,3S4PC@5042|Eurotiales	4751|Fungi	I	Fatty acid synthase, beta subunit	2.3.1.86	K00668
qsuwhite_gene_188234	1.38891e+06	888119	3.34136e+06	0.639438	2.40575	3.76229	1	0.0185434	0.000725281	1	0.186069	0.00633972	0.00553796	0.0400845	Au+	5.05e-13	COG0450@1|root,KOG0854@2759|Eukaryota,38CN4@33154|Opisthokonta,3NW6E@4751|Fungi,3QMF7@4890|Ascomycota,20BB3@147545|Eurotiomycetes,3S4RV@5042|Eurotiales	4751|Fungi	O	Mitochondrial peroxiredoxin PRX1	-	-
qsuwhite_gene_193422	60558.6	19584.6	58241	0.323399	0.96173	2.97381	0.0114962	0.739364	0.00208924	0.154231	0.889301	0.0138998	0.00610068	0.0422777	Au+	7.55e-82	COG0148@1|root,KOG2670@2759|Eukaryota,38C66@33154|Opisthokonta,3NXC1@4751|Fungi,1GVIF@112252|Fungi incertae sedis	4751|Fungi	G	Enolase, N-terminal domain	4.2.1.11	K01689
qsuwhite_gene_194560	434849	215645	759046	0.495906	1.74554	3.5199	0.0432571	0.0524259	4.33004e-05	0.279663	0.245851	0.00102315	0.000775052	0.0178661	Au+	0	COG1866@1|root,2QQI5@2759|Eukaryota,38BH0@33154|Opisthokonta,3NVNR@4751|Fungi,3QKP0@4890|Ascomycota,20EC9@147545|Eurotiomycetes,3S2X0@5042|Eurotiales	4751|Fungi	H	phosphoenolpyruvate carboxykinase	4.1.1.49	K01610
qsuwhite_gene_195245	118770	60690.9	352795	0.510995	2.9704	5.81299	0.684211	0.00388621	0.000487129	0.894493	0.177283	0.00477035	0.00183986	0.0235612	Au+	9.29e-225	COG0516@1|root,KOG2550@2759|Eukaryota,38FT7@33154|Opisthokonta,3NVXY@4751|Fungi,3QJYJ@4890|Ascomycota,20DHG@147545|Eurotiomycetes,3S3ZX@5042|Eurotiales	4751|Fungi	F	Catalyzes the conversion of inosine 5'-phosphate (IMP) to xanthosine 5'-phosphate (XMP), the first committed and rate- limiting step in the de novo synthesis of guanine nucleotides, and therefore plays an important role in the regulation of cell growth	1.1.1.205	K00088
qsuwhite_gene_198653	24366.2	8303.93	90609.1	0.340798	3.71865	10.9116	0.247451	0.00684146	0.00105003	0.622878	0.177283	0.00838767	0.00234497	0.0261843	Au+	8.45e-63	COG0018@1|root,KOG1195@2759|Eukaryota,38DX4@33154|Opisthokonta,3NVK0@4751|Fungi,3QKP2@4890|Ascomycota,20CVP@147545|Eurotiomycetes,3S37W@5042|Eurotiales	4751|Fungi	J	Belongs to the class-I aminoacyl-tRNA synthetase family	6.1.1.19	K01887
qsuwhite_gene_206375	108910	48482.6	282827	0.445162	2.59689	5.83358	0.190316	0.00287947	1.08251e-05	0.555404	0.177283	0.000574593	0.000264566	0.0172216	Au+	0	COG0334@1|root,KOG2250@2759|Eukaryota,390UX@33154|Opisthokonta,3NVNH@4751|Fungi,3QKWJ@4890|Ascomycota,20CED@147545|Eurotiomycetes,3S6DY@5042|Eurotiales	4751|Fungi	E	NAD( )-dependent glutamate dehydrogenase which degrades glutamate to ammonia and alpha-ketoglutarate	1.4.1.2	K15371
qsuwhite_gene_208286	269987	109805	460323	0.406703	1.70498	4.1922	0.0630128	0.105122	7.57756e-05	0.339389	0.338025	0.00140166	0.00162551	0.0223813	Au+	1.08e-177	COG0158@1|root,KOG1458@2759|Eukaryota,38D1X@33154|Opisthokonta,3NUA1@4751|Fungi,3QJK1@4890|Ascomycota,20ASS@147545|Eurotiomycetes,3S5VX@5042|Eurotiales	4751|Fungi	G	Belongs to the FBPase class 1 family	3.1.3.11	K03841
qsuwhite_gene_209531	251728	150190	574335	0.596637	2.28157	3.82406	0.279861	0.0114962	0.000487129	0.655994	0.17917	0.00477035	0.00222988	0.0256822	Au+	5.45e-24	COG1053@1|root,KOG2403@2759|Eukaryota,38CSD@33154|Opisthokonta,3BAX6@33208|Metazoa,3CW8X@33213|Bilateria,489Z8@7711|Chordata,4985W@7742|Vertebrata,4CGSE@8459|Testudines	33208|Metazoa	C	succinate dehydrogenase	1.3.5.1	K00234
qsuwhite_gene_209853	4.45901e+06	2.33182e+06	1.13938e+07	0.522947	2.55524	4.88623	0.795936	0.0114962	7.57756e-05	0.941727	0.17917	0.00140166	0.00174731	0.0230199	Au+	4.48e-254	COG1012@1|root,KOG2450@2759|Eukaryota,38CDB@33154|Opisthokonta,3NW4N@4751|Fungi,3QNF2@4890|Ascomycota,20E34@147545|Eurotiomycetes,3B1VJ@33183|Onygenales,3FKVI@34383|Onygenales incertae sedis	4751|Fungi	C	Belongs to the aldehyde dehydrogenase family	1.2.1.3,1.2.1.5	K00128,K00129
qsuwhite_gene_213363	52494.4	14808	133009	0.282087	2.53377	8.98225	0.123005	0.035463	0.00105003	0.458299	0.214861	0.00838767	0.00376042	0.0325207	Au+	2.26e-125	COG2220@1|root,KOG3798@2759|Eukaryota,39UP3@33154|Opisthokonta,3NX7Q@4751|Fungi,3QQ6X@4890|Ascomycota,20CK9@147545|Eurotiomycetes,3S6JU@5042|Eurotiales	4751|Fungi	S	Zn-dependent hydrolase oxidoreductase family protein	-	-
qsuwhite_gene_218530	22871.4	7484.42	70223.8	0.32724	3.07038	9.38267	0.165494	0.0114962	1.08251e-05	0.527292	0.17917	0.000574593	0.000479589	0.0172216	Au+	1.77e-86	COG1224@1|root,KOG1942@2759|Eukaryota,38CD9@33154|Opisthokonta,3NV13@4751|Fungi,3QNZ7@4890|Ascomycota,20CCE@147545|Eurotiomycetes,3AZFV@33183|Onygenales,3FN4U@34383|Onygenales incertae sedis	4751|Fungi	K	DNA helicase participates in several chromatin remodeling complexes, including the SWR1 and the INO80 complexes	-	K04499
qsuwhite_gene_223110	23794	11228.2	46233.8	0.471889	1.94308	4.11767	0.217563	0.0114962	0.000324753	0.588496	0.17917	0.00350857	0.00167663	0.0226343	Au+	0	COG5116@1|root,KOG2062@2759|Eukaryota,38E5Y@33154|Opisthokonta,3NUMK@4751|Fungi,3QNFY@4890|Ascomycota,20B7T@147545|Eurotiomycetes,3S7A4@5042|Eurotiales	4751|Fungi	O	26S proteasome regulatory subunit Rpn2	-	K03032
qsuwhite_gene_224248	121001	32146	272492	0.265668	2.25199	8.47669	0.00684146	0.0185434	7.57756e-05	0.131532	0.186069	0.00140166	0.000255178	0.0172216	Au+	5.46e-85	COG0045@1|root,KOG1254@2759|Eukaryota,38D3E@33154|Opisthokonta,3NU6W@4751|Fungi,3QRE1@4890|Ascomycota,20CN5@147545|Eurotiomycetes,3S4HA@5042|Eurotiales	4751|Fungi	C	ATP citrate lyase subunit (Acl)	2.3.3.8	K01648
qsuwhite_gene_224249	140050	42959.4	337396	0.306742	2.4091	7.85383	0.0232306	0.0146896	1.08251e-05	0.208025	0.182685	0.000574593	0.000209733	0.0172216	Au+	1.43e-227	COG0045@1|root,KOG1254@2759|Eukaryota,38D3E@33154|Opisthokonta,3NU6W@4751|Fungi,3QRE1@4890|Ascomycota,20CN5@147545|Eurotiomycetes,3S4HA@5042|Eurotiales	4751|Fungi	C	ATP citrate lyase subunit (Acl)	2.3.3.8	K01648
qsuwhite_gene_226715	71818.2	34400	177438	0.478987	2.47065	5.15807	0.0630128	0.00388621	2.16502e-05	0.339389	0.177283	0.000724144	0.000225448	0.0172216	Au+	3.08e-11	COG5171@1|root,KOG0864@2759|Eukaryota,38EUB@33154|Opisthokonta,3NYZB@4751|Fungi,1GTMM@112252|Fungi incertae sedis	4751|Fungi	U	Ran-binding domain	-	K15306
qsuwhite_gene_235274	18365	6495.68	48863.5	0.353699	2.66068	7.52246	0.0892096	0.105122	0.00150469	0.396036	0.338025	0.0106594	0.0064654	0.0437699	Au+	5.4e-31	28K5W@1|root,2QSKG@2759|Eukaryota,39GXX@33154|Opisthokonta,3NUA9@4751|Fungi,3QP4V@4890|Ascomycota	4751|Fungi	S	Methyltransferase	-	-
qsuwhite_gene_241812	117044	55895.9	227344	0.477563	1.94238	4.06728	0.279861	0.0524259	0.000487129	0.655994	0.245851	0.00477035	0.00489275	0.0375282	Au+	0	COG0567@1|root,KOG0450@2759|Eukaryota,38FJ2@33154|Opisthokonta,3NV83@4751|Fungi,3QNW7@4890|Ascomycota,20B7S@147545|Eurotiomycetes,3S5EQ@5042|Eurotiales	4751|Fungi	C	Dehydrogenase	1.2.4.2	K00164
qsuwhite_gene_246586	167536	69204.5	381243	0.413073	2.27559	5.50893	0.075256	0.0146896	1.08251e-05	0.366523	0.182685	0.000574593	0.000366227	0.0172216	Au+	1.67e-152	COG0656@1|root,KOG1577@2759|Eukaryota,38HH0@33154|Opisthokonta,3NV0A@4751|Fungi,3QMT9@4890|Ascomycota,20FG1@147545|Eurotiomycetes,3S3RH@5042|Eurotiales	4751|Fungi	C	Catalyzes the initial reaction in the xylose utilization pathway by reducing D-xylose into xylitol. Xylose is a major component of hemicelluloses such as xylan. Most fungi utilize D- xylose via three enzymatic reactions, xylose reductase (XR), xylitol dehydrogenase (XDH), and xylulokinase, to form xylulose 5- phosphate, which enters pentose phosphate pathway (By similarity)	1.1.1.307	K17743
qsuwhite_gene_246715	34251.4	10857.2	129005	0.316987	3.76641	11.8819	0.217563	0.0089307	0.00519604	0.588496	0.177283	0.0276405	0.0057417	0.0408591	Au+	9.69e-242	KOG0123@1|root,KOG0123@2759|Eukaryota,38F9F@33154|Opisthokonta,3NXFC@4751|Fungi,3QK28@4890|Ascomycota,20AXF@147545|Eurotiomycetes,3S4NZ@5042|Eurotiales	4751|Fungi	A	Binds the poly(A) tail of mRNA. Appears to be an important mediator of the multiple roles of the poly(A) tail in mRNA biogenesis, stability and translation. In the nucleus, involved in both mRNA cleavage and polyadenylation. Is also required for efficient mRNA export to the cytoplasm. Acts in concert with a poly(A)-specific nuclease (PAN) to affect poly(A) tail shortening, which may occur concomi…	-	K13126
qsuwhite_gene_247620	62092.8	30279.7	155589	0.487653	2.50575	5.1384	0.247451	0.00287947	2.16502e-05	0.622878	0.177283	0.000724144	0.000362934	0.0172216	Au+	2.8e-289	2CMXK@1|root,2QSJS@2759|Eukaryota,38I1X@33154|Opisthokonta,3NY7W@4751|Fungi,3QPJQ@4890|Ascomycota,20AUP@147545|Eurotiomycetes,3S3B7@5042|Eurotiales	4751|Fungi	S	Protein of unknown function (DUF2433)	-	-
qsuwhite_gene_248366	42240.9	13643.9	109627	0.323003	2.59528	8.03483	0.0232306	0.00519604	1.08251e-05	0.208025	0.177283	0.000574593	0.000133172	0.0172216	Au+	1.4e-116	KOG0118@1|root,KOG0118@2759|Eukaryota,39JCJ@33154|Opisthokonta,3NV1Z@4751|Fungi,3QM6K@4890|Ascomycota,20CXD@147545|Eurotiomycetes,3B1SR@33183|Onygenales,3FJAU@34383|Onygenales incertae sedis	4751|Fungi	J	RNA recognition motif. (a.k.a. RRM, RBD, or RNP domain)	-	K13201
qsuwhite_gene_250377	39458.7	11117.2	87566.9	0.281742	2.2192	7.87673	0.00388621	0.0524259	2.16502e-05	0.114323	0.245851	0.000724144	0.000207847	0.0172216	Au+	1.97e-138	COG3407@1|root,KOG2833@2759|Eukaryota,38DKK@33154|Opisthokonta,3NW3F@4751|Fungi,3QJFC@4890|Ascomycota,20BRB@147545|Eurotiomycetes,3S7JR@5042|Eurotiales	4751|Fungi	I	Belongs to the diphosphomevalonate decarboxylase family	4.1.1.33	K01597
qsuwhite_gene_250868	72815.8	51384.9	133269	0.705684	1.83023	2.59355	0.435872	0.0232306	0.00208924	0.762178	0.192276	0.0138998	0.00731799	0.0474374	Au+	1.16e-71	COG5023@1|root,KOG1375@2759|Eukaryota,38EHS@33154|Opisthokonta,3NVXK@4751|Fungi,3QM2R@4890|Ascomycota,20WKB@147548|Leotiomycetes	4751|Fungi	Z	Tubulin is the major constituent of microtubules. It binds two moles of GTP, one at an exchangeable site on the beta chain and one at a non-exchangeable site on the alpha chain	-	K07375
qsuwhite_gene_250911	91051.5	35679.6	220080	0.391862	2.4171	6.16824	0.190316	0.035463	1.08251e-05	0.555404	0.214861	0.000574593	0.000936929	0.0187756	Au+	8.82e-56	29YJK@1|root,2RXU4@2759|Eukaryota,39RWE@33154|Opisthokonta,3NXAF@4751|Fungi,3QPUK@4890|Ascomycota,20AG6@147545|Eurotiomycetes,3S6Q4@5042|Eurotiales	4751|Fungi	S	Mitochondrial genome maintenance protein MGM101	-	-
qsuwhite_gene_259499	65128.2	32836.1	149950	0.504177	2.30238	4.56661	0.165494	0.0185434	4.33004e-05	0.527292	0.186069	0.00102315	0.000897871	0.0184465	Au+	1.88e-85	COG1224@1|root,KOG2680@2759|Eukaryota,38DYY@33154|Opisthokonta,3NVB1@4751|Fungi,3QMDV@4890|Ascomycota,20DUJ@147545|Eurotiomycetes,3S7GB@5042|Eurotiales	4751|Fungi	L	participates in several chromatin remodeling complexes, including the SWR1 and the INO80 complexes	3.6.4.12	K11338
qsuwhite_gene_259906	419727	222831	729828	0.530895	1.73882	3.27526	0.0288056	0.0185434	4.33004e-05	0.230602	0.186069	0.00102315	0.000388121	0.0172216	Au+	1.85e-287	COG0021@1|root,KOG0523@2759|Eukaryota,38B8B@33154|Opisthokonta,3NZ8A@4751|Fungi,3QKHN@4890|Ascomycota,20EAU@147545|Eurotiomycetes,3S7UB@5042|Eurotiales	4751|Fungi	G	Catalyzes the transfer of a two-carbon ketol group from a ketose donor to an aldose acceptor, via a covalent intermediate with the cofactor thiamine pyrophosphate	2.2.1.1	K00615
qsuwhite_gene_270740	1.21153e+06	481320	1.77996e+06	0.397282	1.46918	3.69808	0.075256	0.190316	2.16502e-05	0.366523	0.459935	0.000724144	0.00173384	0.0230199	Au+	2.35e-57	COG5272@1|root,KOG0001@2759|Eukaryota,38ECC@33154|Opisthokonta,3NVIF@4751|Fungi,1GVCA@112252|Fungi incertae sedis	4751|Fungi	O	Ubiquitin-like domain	-	K08770
qsuwhite_gene_274205	32133.6	9835.35	83213	0.306077	2.5896	8.4606	0.630529	0.0185434	2.16502e-05	0.869797	0.186069	0.000724144	0.00146798	0.021757	Au+	1.38e-99	COG1156@1|root,KOG1351@2759|Eukaryota,38F6K@33154|Opisthokonta,3NWY5@4751|Fungi,1GSZR@112252|Fungi incertae sedis	4751|Fungi	C	ATP synthase alpha/beta family, nucleotide-binding domain	-	K02147
qsuwhite_gene_281782	17072.4	7779.5	54393.8	0.455677	3.18607	6.99194	0.352681	0.00287947	2.16502e-05	0.716613	0.177283	0.000724144	0.000423714	0.0172216	Au+	0	COG5308@1|root,KOG1900@2759|Eukaryota,38TTX@33154|Opisthokonta,3NU2K@4751|Fungi,3QKCD@4890|Ascomycota,20E8I@147545|Eurotiomycetes,3S6ZN@5042|Eurotiales	4751|Fungi	UY	nucleoporin	-	K14312
qsuwhite_gene_283749	22158.7	6864.97	72013.5	0.30981	3.2499	10.49	0.075256	0.0114962	0.00519604	0.366523	0.17917	0.0276405	0.00431158	0.0348206	Au+	2.43e-182	COG5277@1|root,KOG0679@2759|Eukaryota,38BYA@33154|Opisthokonta,3NUWX@4751|Fungi,3QKE8@4890|Ascomycota,20DPE@147545|Eurotiomycetes,3S89D@5042|Eurotiales	4751|Fungi	Z	Belongs to the actin family	-	K11340,K11400,K11652
qsuwhite_gene_301996	80914.8	38258.6	161606	0.472826	1.99724	4.22405	0.279861	0.0114962	7.57756e-05	0.655994	0.17917	0.00140166	0.00109384	0.0199913	Au+	0	COG5354@1|root,KOG2314@2759|Eukaryota,38C0Z@33154|Opisthokonta,3NXCR@4751|Fungi,3QM53@4890|Ascomycota,20CYU@147545|Eurotiomycetes,3B05C@33183|Onygenales	4751|Fungi	J	Component of the eukaryotic translation initiation factor 3 (eIF-3) complex, which is involved in protein synthesis and, together with other initiation factors, stimulates binding of mRNA and methionyl-tRNAi to the 40S ribosome	-	K03253
qsuwhite_gene_302331	25127.6	16952.8	52088.2	0.674668	2.07295	3.07254	0.970512	0.0232306	0.000324753	0.990388	0.192276	0.00350857	0.00459891	0.0364578	Au+	0	KOG1839@1|root,KOG1839@2759|Eukaryota,38HJZ@33154|Opisthokonta,3NVWU@4751|Fungi,3QM8K@4890|Ascomycota,20E50@147545|Eurotiomycetes,3S4NW@5042|Eurotiales	4751|Fungi	S	mRNA-binding protein involved in proper cytoplasmic distribution of mitochondria	-	K03255
qsuwhite_gene_303317	14500.1	7435.11	28371.9	0.512761	1.95667	3.81594	0.352681	0.00287947	2.16502e-05	0.716613	0.177283	0.000724144	0.000423714	0.0172216	Au+	3.12e-114	KOG0980@1|root,KOG0980@2759|Eukaryota,38H1K@33154|Opisthokonta,3Q3C0@4751|Fungi,3QKN1@4890|Ascomycota,20DKQ@147545|Eurotiomycetes,3S4Y1@5042|Eurotiales	4751|Fungi	Z	Cytoskeleton assembly control protein Sla2	-	K20040
qsuwhite_gene_309065	29871.1	7876.99	63708.2	0.2637	2.13277	8.08788	0.247451	0.075256	0.000324753	0.622878	0.283857	0.00350857	0.00476196	0.0369506	Au+	4.67e-97	COG0638@1|root,KOG0180@2759|Eukaryota,38GZR@33154|Opisthokonta,3NWF8@4751|Fungi,3QKBY@4890|Ascomycota,20BB2@147545|Eurotiomycetes,3B1IJ@33183|Onygenales,3FIVN@34383|Onygenales incertae sedis	4751|Fungi	O	Proteasome subunit beta	3.4.25.1	K02735
qsuwhite_gene_309122	63598.3	30265.9	126731	0.475891	1.99268	4.18727	0.247451	0.0185434	0.000205677	0.622878	0.186069	0.00258863	0.00188796	0.0238436	Au+	0	COG0513@1|root,KOG0335@2759|Eukaryota,38IV8@33154|Opisthokonta,3NUJV@4751|Fungi,3QJJ5@4890|Ascomycota,20B66@147545|Eurotiomycetes,3S46A@5042|Eurotiales	4751|Fungi	A	Belongs to the DEAD box helicase family	3.6.4.13	K11594
qsuwhite_gene_309572	46067.7	14818.8	107674	0.321674	2.3373	7.26606	0.0892096	0.0432571	4.33004e-05	0.396036	0.228284	0.00102315	0.00101627	0.0193855	Au+	1.8e-64	COG0330@1|root,KOG3083@2759|Eukaryota,38DP2@33154|Opisthokonta,3NW8M@4751|Fungi,3QJP3@4890|Ascomycota,20FM3@147545|Eurotiomycetes,3S78N@5042|Eurotiales	4751|Fungi	O	Prohibitin complex subunit Phb1	-	K17080
qsuwhite_gene_311769	6744.93	5280.22	19606.4	0.782842	2.90683	3.71317	0.0232306	0.0146896	0.00150469	0.208025	0.182685	0.0106594	0.00149088	0.0217954	Au+	9.54e-186	COG2843@1|root,2S32D@2759|Eukaryota,38CWE@33154|Opisthokonta,3P1K2@4751|Fungi,3QQW7@4890|Ascomycota,20CXG@147545|Eurotiomycetes,3S5A3@5042|Eurotiales	4751|Fungi	M	Polyglutamate biosynthesis protein	-	-
qsuwhite_gene_311819	23081.3	6137.89	55108.9	0.265924	2.3876	8.97848	0.00287947	0.165494	0.00150469	0.109855	0.426096	0.0106594	0.00165514	0.0225351	Au+	2.99e-230	KOG3675@1|root,KOG3675@2759|Eukaryota,38E6G@33154|Opisthokonta,3NWHP@4751|Fungi,3QMR7@4890|Ascomycota,20E8C@147545|Eurotiomycetes,3S7YE@5042|Eurotiales	4751|Fungi	O	Belongs to the peptidase M49 family	3.4.14.4	K01277
qsuwhite_gene_313947	92214.8	56632.9	221849	0.614142	2.40579	3.91731	0.314999	0.0146896	0.000129901	0.689797	0.182685	0.00195787	0.00156985	0.0221138	Au+	3.07e-42	KOG0767@1|root,KOG0767@2759|Eukaryota,38DBA@33154|Opisthokonta,3NWEF@4751|Fungi,3QJS1@4890|Ascomycota,1ZY38@147541|Dothideomycetes	4751|Fungi	C	Belongs to the mitochondrial carrier (TC 2.A.29) family	-	K15102
qsuwhite_gene_314459	27560.5	11180.4	71715.6	0.405667	2.60211	6.41439	0.578742	0.0114962	0.000324753	0.846164	0.17917	0.00350857	0.00254684	0.0269507	Au+	4.03e-113	COG0538@1|root,KOG1526@2759|Eukaryota,38CG3@33154|Opisthokonta,3NVZ4@4751|Fungi,1GT6W@112252|Fungi incertae sedis	4751|Fungi	C	Isocitrate/isopropylmalate dehydrogenase	1.1.1.42	K00031
qsuwhite_gene_315314	113841	82184.3	204277	0.721923	1.79441	2.4856	0.279861	0.0232306	0.00287947	0.655994	0.192276	0.0177096	0.00714998	0.0466788	Au+	1.59e-65	COG0627@1|root,KOG3101@2759|Eukaryota,38RFR@33154|Opisthokonta,3NW46@4751|Fungi,3QKQ7@4890|Ascomycota,20BTF@147545|Eurotiomycetes,3S7QD@5042|Eurotiales	4751|Fungi	S	Serine hydrolase involved in the detoxification of formaldehyde	3.1.2.12	K01070
qsuwhite_gene_321849	527721	313005	1.27661e+06	0.593126	2.4191	4.07855	0.630529	0.0089307	0.000725281	0.869797	0.177283	0.00633972	0.00319616	0.0300923	Au+	3.52e-135	KOG2449@1|root,KOG2449@2759|Eukaryota,38EU5@33154|Opisthokonta,3NWK1@4751|Fungi,3QQ0M@4890|Ascomycota,20ACG@147545|Eurotiomycetes,3S3R5@5042|Eurotiales	4751|Fungi	EG	Methylmalonate-semialdehyde dehydrogenase	1.2.1.18,1.2.1.27	K00140
qsuwhite_gene_322725	44261.8	19879.7	100721	0.449138	2.27558	5.06655	0.217563	0.00684146	1.08251e-05	0.588496	0.177283	0.000574593	0.000423714	0.0172216	Au+	3.26e-112	KOG0643@1|root,KOG0643@2759|Eukaryota,38D40@33154|Opisthokonta,3NV6H@4751|Fungi,3QKUY@4890|Ascomycota,20FRD@147545|Eurotiomycetes,3S3R3@5042|Eurotiales	4751|Fungi	J	component of the eukaryotic translation initiation factor 3 (eIF-3) complex, which is involved in protein synthesis of a specialized repertoire of mRNAs and, together with other initiation factors, stimulates binding of mRNA and methionyl-tRNAi to the 40S ribosome. The eIF-3 complex specifically targets and initiates translation of a subset of mRNAs involved in cell proliferation	-	K03246
qsuwhite_gene_322733	193680	104393	413955	0.538998	2.13731	3.96534	0.528849	0.0432571	0.000324753	0.821246	0.228284	0.00350857	0.00512539	0.0385457	Au+	8.23e-82	COG0538@1|root,KOG1526@2759|Eukaryota,38CG3@33154|Opisthokonta,3NVZ4@4751|Fungi,3QKEP@4890|Ascomycota,20EC2@147545|Eurotiomycetes,3B15E@33183|Onygenales,3FN3E@34383|Onygenales incertae sedis	4751|Fungi	C	Belongs to the isocitrate and isopropylmalate dehydrogenases family	1.1.1.42	K00031
qsuwhite_gene_322780	152129	67545.4	377931	0.444	2.48428	5.59522	0.123005	0.00684146	4.33004e-05	0.458299	0.177283	0.00102315	0.000479589	0.0172216	Au+	2.62e-133	COG1448@1|root,KOG1411@2759|Eukaryota,38ED5@33154|Opisthokonta,3NU8Q@4751|Fungi,3QK4W@4890|Ascomycota,20FFP@147545|Eurotiomycetes,3S3C4@5042|Eurotiales	4751|Fungi	E	Aspartate aminotransferase	2.6.1.1	K14455
qsuwhite_gene_326860	22190.8	8659.44	53471.3	0.390227	2.40962	6.17491	0.14314	0.0232306	1.08251e-05	0.497156	0.192276	0.000574593	0.000639491	0.0172216	Au+	3.93e-219	COG0665@1|root,KOG2161@1|root,KOG3263@1|root,KOG2161@2759|Eukaryota,KOG2852@2759|Eukaryota,KOG3263@2759|Eukaryota,38CWF@33154|Opisthokonta,3NVNE@4751|Fungi,3QN3K@4890|Ascomycota,20AQY@147545|Eurotiomycetes,3S88T@5042|Eurotiales	4751|Fungi	G	mannosyl-oligosaccharide glucosidase	3.2.1.106	K01228
qsuwhite_gene_334809	192210	116923	298674	0.608308	1.5539	2.55446	0.165494	0.0630128	0.00150469	0.527292	0.262853	0.0106594	0.00677281	0.0450598	Au+	6.02e-30	KOG0118@1|root,KOG0118@2759|Eukaryota,38CF6@33154|Opisthokonta,3NW7K@4751|Fungi,3QMU9@4890|Ascomycota,20ATR@147545|Eurotiomycetes,3S32A@5042|Eurotiales	4751|Fungi	A	RNP domain protein	-	-
qsuwhite_gene_335478	25152.6	6126.81	34718.3	0.243585	1.3803	5.66662	0.00388621	0.123005	1.08251e-05	0.114323	0.367761	0.000574593	0.000248357	0.0172216	Au+	2e-67	COG0054@1|root,KOG3243@2759|Eukaryota,39X3H@33154|Opisthokonta,3P149@4751|Fungi,3QPYS@4890|Ascomycota,20GVQ@147545|Eurotiomycetes,3S7KH@5042|Eurotiales	4751|Fungi	H	Catalyzes the formation of 6,7-dimethyl-8- ribityllumazine by condensation of 5-amino-6-(D- ribitylamino)uracil with 3,4-dihydroxy-2-butanone 4-phosphate. This is the penultimate step in the biosynthesis of riboflavin	2.5.1.78	K00794
qsuwhite_gene_337026	175015	94084.5	251648	0.537581	1.43787	2.6747	0.0146896	0.123005	0.00105003	0.169987	0.367761	0.00838767	0.00248837	0.0267655	Au+	0	COG0308@1|root,KOG1046@2759|Eukaryota,38CFG@33154|Opisthokonta,3NWST@4751|Fungi,3QM0X@4890|Ascomycota,20D6I@147545|Eurotiomycetes,3S41W@5042|Eurotiales	4751|Fungi	E	Aminopeptidase	-	K13721
qsuwhite_gene_339181	69298.7	21875.3	111330	0.315667	1.60652	5.0893	0.0114962	0.123005	4.33004e-05	0.154231	0.367761	0.00102315	0.000612832	0.0172216	Au+	1.28e-39	COG0612@1|root,KOG0960@2759|Eukaryota,38CT4@33154|Opisthokonta,3NU8R@4751|Fungi,3QKVR@4890|Ascomycota,20C5P@147545|Eurotiomycetes,3AZ2Y@33183|Onygenales,3FX6X@34384|Arthrodermataceae	4751|Fungi	O	Belongs to the peptidase M16 family	3.4.24.64	K17732
qsuwhite_gene_341263	134932	45257.8	241425	0.335412	1.78924	5.33443	0.035463	0.075256	0.000129901	0.255676	0.283857	0.00195787	0.00122537	0.0202693	Au+	5.84e-97	KOG0279@1|root,KOG0279@2759|Eukaryota,38BFC@33154|Opisthokonta,3NUKD@4751|Fungi,3QNC3@4890|Ascomycota,20AJ7@147545|Eurotiomycetes,3S73K@5042|Eurotiales	4751|Fungi	T	beta subunit CpcB	-	K14753
qsuwhite_gene_343527	53887.9	18823.5	152854	0.349308	2.83652	8.12039	0.393048	0.0185434	0.000205677	0.732217	0.186069	0.00258863	0.00234497	0.0261843	Au+	1.48e-84	COG0183@1|root,KOG1389@2759|Eukaryota,38F89@33154|Opisthokonta,3NX2U@4751|Fungi,3QMVR@4890|Ascomycota,20AIK@147545|Eurotiomycetes,3S6CT@5042|Eurotiales	4751|Fungi	I	Belongs to the thiolase family	2.3.1.16	K07513
qsuwhite_gene_343531	133413	51037.7	319124	0.382553	2.39199	6.25272	0.0432571	0.00105003	1.08251e-05	0.279663	0.177283	0.000574593	9.19566e-05	0.0172216	Au+	2.64e-243	COG0443@1|root,KOG0103@2759|Eukaryota,38HTW@33154|Opisthokonta,3NV9J@4751|Fungi,3QPHJ@4890|Ascomycota,20FEZ@147545|Eurotiomycetes,3S7ZU@5042|Eurotiales	4751|Fungi	O	Belongs to the heat shock protein 70 family	-	K09485,K09489
qsuwhite_gene_350631	16538.8	11227.8	54772.4	0.678875	3.31175	4.8783	0.795936	0.00208924	0.000725281	0.941727	0.177283	0.00633972	0.00168097	0.0226343	Au+	3.35e-87	COG0388@1|root,KOG0805@2759|Eukaryota,39RP6@33154|Opisthokonta,3NWGQ@4751|Fungi,3QRUY@4890|Ascomycota,20EV0@147545|Eurotiomycetes,3S72Y@5042|Eurotiales	4751|Fungi	E	Carbon-nitrogen hydrolase	3.5.5.1	K01501
qsuwhite_gene_354203	32648	8707.04	113045	0.266694	3.46254	12.9832	0.190316	0.0288056	0.00287947	0.555404	0.203276	0.0177096	0.00675536	0.0450598	Au+	1.53000001205429e-316	COG0151@1|root,KOG0237@2759|Eukaryota,38BPB@33154|Opisthokonta,3NXWQ@4751|Fungi,3QPMK@4890|Ascomycota,20DTU@147545|Eurotiomycetes,3S5SZ@5042|Eurotiales	4751|Fungi	F	Bifunctional purine biosynthetic protein Ade1	6.3.3.1,6.3.4.13	K11788
qsuwhite_gene_354205	362185	186520	686038	0.514986	1.89416	3.67808	0.0892096	0.035463	0.000205677	0.396036	0.214861	0.00258863	0.00160053	0.0221777	Au+	3.09e-183	COG5277@1|root,KOG0676@2759|Eukaryota,38C0D@33154|Opisthokonta,3NWC7@4751|Fungi,3QK5Q@4890|Ascomycota,204AI@147541|Dothideomycetes,4KDHW@92860|Pleosporales	4751|Fungi	Z	Belongs to the actin family	-	K05692
qsuwhite_gene_355163	190889	113360	391366	0.593853	2.05024	3.45243	0.911797	0.0232306	0.000129901	0.975879	0.192276	0.00195787	0.00328395	0.0305272	Au+	3.43e-58	COG0055@1|root,KOG1350@2759|Eukaryota,38CQ6@33154|Opisthokonta,3NVU5@4751|Fungi,3QPGY@4890|Ascomycota,1ZZF9@147541|Dothideomycetes	4751|Fungi	C	Produces ATP from ADP in the presence of a proton gradient across the membrane	2.4.1.18,3.6.3.14	K00700,K02133
qsuwhite_gene_357066	33338	13110.3	100013	0.393253	2.99997	7.62859	0.0630128	0.00208924	4.33004e-05	0.339389	0.177283	0.00102315	0.000214384	0.0172216	Au+	0	COG0495@1|root,KOG0437@2759|Eukaryota,38D6H@33154|Opisthokonta,3NUN2@4751|Fungi,3QKHH@4890|Ascomycota,20DDG@147545|Eurotiomycetes,3S3PS@5042|Eurotiales	4751|Fungi	J	Leucyl-tRNA synthetase	6.1.1.4	K01869
qsuwhite_gene_357080	387799	182637	661845	0.470957	1.70667	3.62384	0.0630128	0.0892096	4.33004e-05	0.339389	0.310875	0.00102315	0.00123968	0.0202693	Au+	3.7e-54	COG5045@1|root,KOG3344@2759|Eukaryota,3A3IE@33154|Opisthokonta,3P3VQ@4751|Fungi,3QMD2@4890|Ascomycota,20EUK@147545|Eurotiomycetes,3S3WV@5042|Eurotiales	4751|Fungi	J	40S ribosomal protein S10b	-	K02947
qsuwhite_gene_360349	55852.4	32762	139136	0.586583	2.49113	4.24686	0.352681	0.0114962	0.000324753	0.716613	0.17917	0.00350857	0.00207176	0.0249103	Au+	7.09e-107	KOG0266@1|root,KOG0266@2759|Eukaryota,38E6T@33154|Opisthokonta,3NUUI@4751|Fungi,3QMV0@4890|Ascomycota,20CKW@147545|Eurotiomycetes,3S30D@5042|Eurotiales	4751|Fungi	S	Transcriptional repressor	-	K06666
qsuwhite_gene_363510	640623	352650	1.45969e+06	0.55048	2.27854	4.13919	0.075256	0.00150469	1.08251e-05	0.366523	0.177283	0.000574593	0.000133172	0.0172216	Au+	0	COG0326@1|root,KOG0019@2759|Eukaryota,38B7K@33154|Opisthokonta,3NW2G@4751|Fungi,3QKC7@4890|Ascomycota,20B7E@147545|Eurotiomycetes,3S64V@5042|Eurotiales	4751|Fungi	O	Heat shock protein	-	K04079
qsuwhite_gene_363692	46723.9	18947.5	70499.5	0.40552	1.50885	3.72079	0.123005	0.105122	0.000487129	0.458299	0.338025	0.00477035	0.00465864	0.0366303	Au+	1.11e-240	COG5023@1|root,KOG1376@2759|Eukaryota,38E06@33154|Opisthokonta,3NVD8@4751|Fungi,1GSI4@112252|Fungi incertae sedis	4751|Fungi	Z	Tubulin is the major constituent of microtubules. It binds two moles of GTP, one at an exchangeable site on the beta chain and one at a non-exchangeable site on the alpha chain	-	K07374
qsuwhite_gene_364497	445177	168438	906787	0.378362	2.03691	5.3835	0.0185434	0.0288056	0.000129901	0.188391	0.203276	0.00195787	0.000577516	0.0172216	Au+	3.62e-132	COG0625@1|root,KOG1627@1|root,KOG0867@2759|Eukaryota,KOG1627@2759|Eukaryota,38CDH@33154|Opisthokonta,3NUBV@4751|Fungi,3QME4@4890|Ascomycota,20EEJ@147545|Eurotiomycetes,3S54S@5042|Eurotiales	4751|Fungi	J	Elongation factor	-	K03233
qsuwhite_gene_364556	600300	326293	1.85375e+06	0.54355	3.08804	5.68124	0.795936	0.0146896	0.00150469	0.941727	0.182685	0.0106594	0.00610068	0.0422777	Au+	1.07e-46	KOG0749@1|root,KOG0749@2759|Eukaryota,38B82@33154|Opisthokonta,3NWSK@4751|Fungi,3QJEA@4890|Ascomycota,20B1D@147545|Eurotiomycetes,3S4C0@5042|Eurotiales	4751|Fungi	C	Belongs to the mitochondrial carrier (TC 2.A.29) family	-	K05863
qsuwhite_gene_374005	133060	54073.4	209958	0.406382	1.57792	3.88284	0.0288056	0.279861	0.000487129	0.230602	0.564889	0.00477035	0.00354829	0.0316675	Au+	1.05e-254	COG0160@1|root,KOG1405@2759|Eukaryota,38EZI@33154|Opisthokonta,3NWIR@4751|Fungi,3QKFS@4890|Ascomycota,20F94@147545|Eurotiomycetes,3S40E@5042|Eurotiales	4751|Fungi	E	Belongs to the class-III pyridoxal-phosphate-dependent aminotransferase family	2.6.1.19,2.6.1.22	K13524
qsuwhite_gene_377632	404152	170635	740072	0.422205	1.83117	4.33716	0.035463	0.0630128	2.16502e-05	0.255676	0.262853	0.000724144	0.000633741	0.0172216	Au+	2e-36	KOG0092@1|root,KOG0092@2759|Eukaryota,38HB3@33154|Opisthokonta,3NVI3@4751|Fungi,3QRUG@4890|Ascomycota,3RSWY@4891|Saccharomycetes	4751|Fungi	U	to Saccharomyces cerevisiae YPT52 (YKR014C)	-	K07889,K17785
qsuwhite_gene_378964	28991.2	7284.11	114275	0.251253	3.94172	15.6883	0.123005	0.0089307	0.000205677	0.458299	0.177283	0.00258863	0.000962664	0.0190068	Au+	2.49e-129	KOG0082@1|root,KOG0082@2759|Eukaryota,38C4P@33154|Opisthokonta,3NV23@4751|Fungi,3QKMG@4890|Ascomycota,20DFQ@147545|Eurotiomycetes,3S2WJ@5042|Eurotiales	4751|Fungi	DT	G-protein complex alpha subunit GpaA FadA	-	K04630,K19860
qsuwhite_gene_380062	45987.6	20352.2	123259	0.442558	2.68028	6.05633	0.795936	0.0185434	0.000487129	0.941727	0.186069	0.00477035	0.00439017	0.035261	Au+	3.22e-127	COG0459@1|root,KOG0357@2759|Eukaryota,38CU0@33154|Opisthokonta,3NVV4@4751|Fungi,3QN0C@4890|Ascomycota,20AFB@147545|Eurotiomycetes,3B1XN@33183|Onygenales	4751|Fungi	O	assists the folding of proteins upon ATP hydrolysis	-	K09497
qsuwhite_gene_380125	41757	21649.3	133578	0.51846	3.19894	6.17008	0.352681	0.00684146	0.000725281	0.716613	0.177283	0.00633972	0.0022676	0.0258323	Au+	1.23e-147	COG0699@1|root,KOG0446@2759|Eukaryota,38C4B@33154|Opisthokonta,3NU4R@4751|Fungi,3QJWN@4890|Ascomycota,20DPX@147545|Eurotiomycetes,3S5M8@5042|Eurotiales	4751|Fungi	U	Belongs to the TRAFAC class dynamin-like GTPase superfamily. Dynamin Fzo YdjA family	3.6.5.5	K17065
qsuwhite_gene_380669	149739	54455.2	438679	0.363668	2.92963	8.05578	0.528849	0.0232306	0.000129901	0.821246	0.192276	0.00195787	0.00257326	0.0270433	Au+	2.4e-168	COG0256@1|root,KOG0875@2759|Eukaryota,38BT6@33154|Opisthokonta,3NU2R@4751|Fungi,3QN0K@4890|Ascomycota,20CCS@147545|Eurotiomycetes,3S4AU@5042|Eurotiales	4751|Fungi	J	60S ribosomal protein L5	-	K02932
qsuwhite_gene_380831	74327.4	35647.4	175217	0.4796	2.35737	4.91527	0.0185434	0.00388621	2.16502e-05	0.188391	0.177283	0.000724144	0.000133172	0.0172216	Au+	3.99e-184	KOG2753@1|root,KOG2753@2759|Eukaryota,38I1P@33154|Opisthokonta,3NX3H@4751|Fungi,3QPIM@4890|Ascomycota,20BIF@147545|Eurotiomycetes,3S5A0@5042|Eurotiales	4751|Fungi	J	component of the eukaryotic translation initiation factor 3 (eIF-3) complex, which is involved in protein synthesis of a specialized repertoire of mRNAs and, together with other initiation factors, stimulates binding of mRNA and methionyl-tRNAi to the 40S ribosome. The eIF-3 complex specifically targets and initiates translation of a subset of mRNAs involved in cell proliferation	-	K15030
qsuwhite_gene_383179	85443.9	12368.4	218544	0.144754	2.55775	17.6696	0.247451	0.0630128	0.000725281	0.622878	0.262853	0.00633972	0.00598374	0.0419836	Au+	6.88e-124	COG0626@1|root,KOG0053@2759|Eukaryota,38F3Q@33154|Opisthokonta,3NVTU@4751|Fungi,3QPPV@4890|Ascomycota,20CZZ@147545|Eurotiomycetes,3S64G@5042|Eurotiales	4751|Fungi	E	Homocysteine synthase CysD	2.5.1.47,2.5.1.49	K17069
qsuwhite_gene_386246	43355.7	13793.4	91893.3	0.318146	2.11952	6.66211	0.075256	0.0232306	2.16502e-05	0.366523	0.192276	0.000724144	0.000559906	0.0172216	Au+	0	KOG1076@1|root,KOG1076@2759|Eukaryota,38EZF@33154|Opisthokonta,3NVTJ@4751|Fungi,3QKKR@4890|Ascomycota,20DU7@147545|Eurotiomycetes	4751|Fungi	J	component of the eukaryotic translation initiation factor 3 (eIF-3) complex, which is involved in protein synthesis of a specialized repertoire of mRNAs and, together with other initiation factors, stimulates binding of mRNA and methionyl-tRNAi to the 40S ribosome. The eIF-3 complex specifically targets and initiates translation of a subset of mRNAs involved in cell proliferation	-	K03252
qsuwhite_gene_386604	42049.2	10001.5	108658	0.237852	2.58407	10.8642	0.0630128	0.0185434	0.000324753	0.339389	0.186069	0.00350857	0.00120188	0.0202693	Au+	2.38e-185	COG0404@1|root,KOG2770@2759|Eukaryota,38BS6@33154|Opisthokonta,3NUHA@4751|Fungi,3QKSH@4890|Ascomycota,20F53@147545|Eurotiomycetes,3S71F@5042|Eurotiales	4751|Fungi	E	The glycine cleavage system catalyzes the degradation of glycine	2.1.2.10	K00605
qsuy_gene_5763	219793	115469	471589	0.525353	2.14561	4.08413	0.853428	0.0114962	0.000129901	0.959386	0.17917	0.00195787	0.00212045	0.0249314	Au+	5.24e-120	COG0612@1|root,KOG0960@2759|Eukaryota,38CT4@33154|Opisthokonta,3NU8R@4751|Fungi,3QKVR@4890|Ascomycota,20C5P@147545|Eurotiomycetes,3AZ2Y@33183|Onygenales,3FX6X@34384|Arthrodermataceae	4751|Fungi	O	Belongs to the peptidase M16 family	3.4.24.64	K17732
qsuy_gene_7051	1.12432e+06	697197	2.17016e+06	0.620104	1.93019	3.1127	0.0630128	0.00388621	0.000129901	0.339389	0.177283	0.00195787	0.000413986	0.0172216	Au+	2.35e-91	COG0055@1|root,KOG1350@2759|Eukaryota,38CQ6@33154|Opisthokonta,3NVU5@4751|Fungi,3QPGY@4890|Ascomycota,20DV6@147545|Eurotiomycetes,3S2UQ@5042|Eurotiales	4751|Fungi	C	Produces ATP from ADP in the presence of a proton gradient across the membrane	2.4.1.18,3.6.3.14	K00700,K02133
qsuy_gene_12759	2.40937e+06	977378	4.1729e+06	0.405658	1.73195	4.26948	0.035463	0.0432571	1.08251e-05	0.255676	0.228284	0.000574593	0.000430326	0.0172216	Au+	8.31e-159	COG5277@1|root,KOG0676@2759|Eukaryota,38C0D@33154|Opisthokonta,3NWC7@4751|Fungi,3QK5Q@4890|Ascomycota,3RRX1@4891|Saccharomycetes,47CIB@766764|Debaryomycetaceae	4751|Fungi	Z	Belongs to the actin family	-	K05692
qsuy_gene_22026	36827.6	24425.6	104785	0.663241	2.84529	4.28997	0.970512	0.00519604	0.000725281	0.990388	0.177283	0.00633972	0.00271656	0.0278305	Au+	5.89e-18	COG5047@1|root,KOG1986@2759|Eukaryota	2759|Eukaryota	U	COPII-coated vesicle budding	-	K14006
qsuy_gene_23562	247756	81176	318230	0.327645	1.28445	3.92024	7.57756e-05	0.247451	1.08251e-05	0.0292135	0.528602	0.000574593	7.48036e-05	0.0172216	Au+Sp+	9.52e-65	COG0499@1|root,KOG1370@2759|Eukaryota,38CN8@33154|Opisthokonta,3NU46@4751|Fungi,3QKDU@4890|Ascomycota,20DSA@147545|Eurotiomycetes,3S6UF@5042|Eurotiales	4751|Fungi	H	Adenosylhomocysteinase	3.3.1.1	K01251
qsuy_gene_24605	19650.3	9513.79	25556.7	0.484156	1.30058	2.68628	0.00388621	0.853428	0.00150469	0.114323	0.935273	0.0106594	0.00313894	0.0298607	Au+	2.65e-248	COG1304@1|root,COG5274@1|root,KOG0537@2759|Eukaryota,KOG0538@2759|Eukaryota,39T5X@33154|Opisthokonta,3NVI4@4751|Fungi,3QM7R@4890|Ascomycota,20FZD@147545|Eurotiomycetes,3S57X@5042|Eurotiales	4751|Fungi	C	Belongs to the cytochrome b5 family	1.1.2.3	K00101
qsuy_gene_31785	73712.3	27610.2	168635	0.374567	2.28775	6.1077	0.035463	0.0114962	4.33004e-05	0.255676	0.17917	0.00102315	0.000343789	0.0172216	Au+	0	COG0138@1|root,KOG2555@2759|Eukaryota,38H8U@33154|Opisthokonta,3NY4C@4751|Fungi,3QPYH@4890|Ascomycota,20AQZ@147545|Eurotiomycetes,3S4TM@5042|Eurotiales	4751|Fungi	F	Phosphoribosylaminoimidazolecarboxamide formyltransferase IMP	2.1.2.3,3.5.4.10	K00602
qsuy_gene_31886	12611.1	7328.12	26872	0.581086	2.13082	3.66697	0.190316	0.0185434	0.00105003	0.555404	0.186069	0.00838767	0.00334812	0.030618	Au+	6.49e-167	COG1657@1|root,KOG0497@2759|Eukaryota,38CDP@33154|Opisthokonta,3NX15@4751|Fungi,3QJEM@4890|Ascomycota,20B79@147545|Eurotiomycetes,3S6GG@5042|Eurotiales	4751|Fungi	I	Belongs to the terpene cyclase mutase family	5.4.99.7	K01852
qsuy_gene_34624	347881	204413	645636	0.587595	1.85591	3.15848	0.075256	0.0185434	7.57756e-05	0.366523	0.186069	0.00140166	0.000739873	0.0178661	Au+	3.48e-52	COG5078@1|root,KOG0417@2759|Eukaryota,38B6R@33154|Opisthokonta,3NWPW@4751|Fungi,3QNHS@4890|Ascomycota,3RRH7@4891|Saccharomycetes,47A2K@766764|Debaryomycetaceae	4751|Fungi	O	Belongs to the ubiquitin-conjugating enzyme family	2.3.2.23	K06689
qsuy_gene_36780	6160.45	13856.4	5511.68	2.24925	0.894687	0.39777	0.00208924	0.165494	0.00150469	0.109855	0.426096	0.0106594	0.00145854	0.021757	Su+	1.55e-22	COG0056@1|root,KOG1353@2759|Eukaryota,38ERH@33154|Opisthokonta,3NUHW@4751|Fungi,3QKF2@4890|Ascomycota,21K8K@147550|Sordariomycetes,3UUZN@5151|Ophiostomatales	4751|Fungi	C	ATP synthase alpha/beta chain, C terminal domain	-	K02132
qsuy_gene_40356	39609.8	26489.8	112692	0.668768	2.84505	4.25417	0.528849	0.00105003	0.000129901	0.821246	0.177283	0.00195787	0.000555588	0.0172216	Au+	0	COG0495@1|root,KOG0437@2759|Eukaryota,38D6H@33154|Opisthokonta,3NUN2@4751|Fungi,3QKHH@4890|Ascomycota,20DDG@147545|Eurotiomycetes,3S3PS@5042|Eurotiales	4751|Fungi	J	Leucyl-tRNA synthetase	6.1.1.4	K01869
qsuy_gene_42281	36294.6	6381.43	36875.8	0.175823	1.01601	5.7786	7.57756e-05	0.630529	0.000725281	0.0292135	0.825934	0.00633972	0.000417204	0.0172216	Au+Sp+	3.56e-64	COG0080@1|root,KOG0886@2759|Eukaryota,38GQE@33154|Opisthokonta,3NU9E@4751|Fungi,3QR2P@4890|Ascomycota,20EP4@147545|Eurotiomycetes,3S30M@5042|Eurotiales	4751|Fungi	J	Belongs to the universal ribosomal protein uL11 family	-	K02870
qsuy_gene_44171	131110	75381.9	263737	0.574952	2.01157	3.49868	0.247451	0.0146896	0.000324753	0.622878	0.182685	0.00350857	0.00200083	0.0244676	Au+	1.27e-110	COG1028@1|root,KOG0725@2759|Eukaryota,38HKW@33154|Opisthokonta,3NYCF@4751|Fungi,3RMQ7@4890|Ascomycota,20U5W@147545|Eurotiomycetes	4751|Fungi	Q	Enoyl-(Acyl carrier protein) reductase	-	-
qsuy_gene_51352	282690	214139	563367	0.757508	1.99288	2.63084	0.314999	0.00519604	0.000487129	0.689797	0.177283	0.00477035	0.00160467	0.0221777	Au+	1.88e-26	COG1012@1|root,KOG2450@2759|Eukaryota,38CDB@33154|Opisthokonta,3NW4N@4751|Fungi,3QNF2@4890|Ascomycota,20W0A@147548|Leotiomycetes	4751|Fungi	C	Belongs to the aldehyde dehydrogenase family	1.2.1.3,1.2.1.5	K00128,K00129
qsuy_gene_53518	71149.8	42261.9	141624	0.593985	1.9905	3.35109	0.0892096	0.00684146	0.000205677	0.396036	0.177283	0.00258863	0.000742742	0.0178661	Au+	2.35e-146	COG0050@1|root,KOG0460@2759|Eukaryota,38BHM@33154|Opisthokonta,3NV4W@4751|Fungi,3QK50@4890|Ascomycota,20EW2@147545|Eurotiomycetes,3S3SX@5042|Eurotiales	4751|Fungi	J	This protein promotes the GTP-dependent binding of aminoacyl-tRNA to the A-site of ribosomes during protein biosynthesis	-	K02358
qsuy_gene_58227	583557	210614	839273	0.360915	1.4382	3.98488	0.000725281	0.314999	7.57756e-05	0.102167	0.599784	0.00140166	0.000329882	0.0172216	Au+	1.01e-127	COG1100@1|root,KOG0070@2759|Eukaryota,38BDM@33154|Opisthokonta,3NVWA@4751|Fungi,3QM2K@4890|Ascomycota,3RREK@4891|Saccharomycetes,47AB0@766764|Debaryomycetaceae	4751|Fungi	U	Belongs to the small GTPase superfamily. Arf family	-	K07937,K07977
qsuy_gene_64453	39224.4	25078.4	114831	0.639359	2.92754	4.57887	0.578742	0.0089307	7.57756e-05	0.846164	0.177283	0.00140166	0.00133257	0.0209916	Au+	1.39e-32	KOG4747@1|root,KOG4747@2759|Eukaryota,3A5QI@33154|Opisthokonta,3P5HM@4751|Fungi,3QVSS@4890|Ascomycota,20I28@147545|Eurotiomycetes,3S940@5042|Eurotiales	4751|Fungi	T	Phosphotransmitter protein Ypd1	-	K11232
qsuy_gene_65742	4.76607e+06	2.53161e+06	8.50116e+06	0.531174	1.78368	3.358	0.0524259	0.0630128	7.57756e-05	0.309444	0.262853	0.00140166	0.00113262	0.0199913	Au+	0	COG0443@1|root,KOG0101@2759|Eukaryota,38BSZ@33154|Opisthokonta,3NVJE@4751|Fungi,3QJZ7@4890|Ascomycota,20FRR@147545|Eurotiomycetes,3S4PY@5042|Eurotiales	4751|Fungi	O	Belongs to the heat shock protein 70 family	-	K03283
qsuy_gene_68073	89901.5	32811.6	223383	0.364973	2.48475	6.80806	0.190316	0.0089307	1.08251e-05	0.555404	0.177283	0.000574593	0.000452535	0.0172216	Au+	7.31e-144	COG1208@1|root,KOG1460@2759|Eukaryota,38DS2@33154|Opisthokonta,3NTWK@4751|Fungi,3QQM9@4890|Ascomycota,20EIC@147545|Eurotiomycetes,3S7DH@5042|Eurotiales	4751|Fungi	GMO	GDP-mannose pyrophosphorylase A	2.7.7.13	K00966
qsuy_gene_85051	28494.3	9747.84	75177.8	0.342098	2.63835	7.71225	0.00150469	0.00684146	1.08251e-05	0.10398	0.177283	0.000574593	5.00131e-05	0.0172216	Au+	3.74e-138	KOG4840@1|root,KOG4840@2759|Eukaryota,39XSM@33154|Opisthokonta,3P03V@4751|Fungi,3QRPT@4890|Ascomycota,20CKX@147545|Eurotiomycetes,3S4SH@5042|Eurotiales	4751|Fungi	S	Siderophore biosynthesis lipase esterase	-	-
qsuy_gene_88538	44316.7	25463.3	112102	0.574576	2.52956	4.40249	0.279861	0.00684146	7.57756e-05	0.655994	0.177283	0.00140166	0.000845038	0.0179939	Au+	4.97e-81	COG2513@1|root,KOG1260@2759|Eukaryota,38CWA@33154|Opisthokonta,3NU9G@4751|Fungi,3QMNU@4890|Ascomycota,20AYR@147545|Eurotiomycetes	4751|Fungi	C	Belongs to the isocitrate lyase PEP mutase superfamily. Isocitrate lyase family	4.1.3.1	K01637
qsuy_gene_97480	28534.5	12601.1	48683	0.441607	1.70611	3.86341	0.0185434	0.14314	0.00105003	0.188391	0.394322	0.00838767	0.00295805	0.0290842	Au+	2.87e-185	COG3733@1|root,KOG1186@2759|Eukaryota,38EP0@33154|Opisthokonta,3NTVH@4751|Fungi,3QMPW@4890|Ascomycota,20AH5@147545|Eurotiomycetes	4751|Fungi	Q	amine oxidase	1.4.3.21	K00276
qsuy_gene_98826	494326	269705	740799	0.545602	1.4986	2.7467	0.0630128	0.165494	0.000725281	0.339389	0.426096	0.00633972	0.00489275	0.0375282	Au+	2.82e-133	COG0055@1|root,KOG1350@2759|Eukaryota,38CQ6@33154|Opisthokonta,3NVU5@4751|Fungi,3QPGY@4890|Ascomycota,3RRFU@4891|Saccharomycetes,47AD1@766764|Debaryomycetaceae	4751|Fungi	C	Produces ATP from ADP in the presence of a proton gradient across the membrane	2.4.1.18,3.6.3.14	K00700,K02133
qsuy_gene_104420	225868	76926.6	285083	0.340582	1.26217	3.70591	0.00519604	0.481251	1.08251e-05	0.121601	0.736711	0.000574593	0.000536565	0.0172216	Au+	2.9e-71	COG0473@1|root,KOG0785@2759|Eukaryota,38CQA@33154|Opisthokonta,3NVMJ@4751|Fungi,3QMCG@4890|Ascomycota,3RSMM@4891|Saccharomycetes,47B81@766764|Debaryomycetaceae	4751|Fungi	C	Isocitrate dehydrogenase NAD subunit, mitochondrial	1.1.1.41	K00030
qsuy_gene_105380	47665.1	24997.7	129279	0.524444	2.71223	5.17164	0.528849	0.0089307	0.000205677	0.821246	0.177283	0.00258863	0.00181627	0.0233817	Au+	7.55e-38	COG0111@1|root,KOG0068@2759|Eukaryota,38GJA@33154|Opisthokonta,3NU0Y@4751|Fungi,3QJMR@4890|Ascomycota,20CZU@147545|Eurotiomycetes,3AZG6@33183|Onygenales,3FKWI@34383|Onygenales incertae sedis	4751|Fungi	EH	Belongs to the D-isomer specific 2-hydroxyacid dehydrogenase family	1.1.1.399,1.1.1.95	K00058
qsuy_gene_117871	59698.1	31055.4	109756	0.520207	1.83852	3.53421	0.0432571	0.0892096	0.000324753	0.279663	0.310875	0.00350857	0.00211498	0.0249314	Au+	1.52e-193	COG0045@1|root,KOG1254@2759|Eukaryota,38D3E@33154|Opisthokonta,3NU6W@4751|Fungi,3QRE1@4890|Ascomycota,20CN5@147545|Eurotiomycetes,3S4HA@5042|Eurotiales	4751|Fungi	C	ATP citrate lyase subunit (Acl)	2.3.3.8	K01648
qsuy_gene_121713	182944	88981	334000	0.486385	1.8257	3.7536	0.0892096	0.0146896	2.16502e-05	0.396036	0.182685	0.000724144	0.000485818	0.0172216	Au+	6e-186	COG2057@1|root,KOG3822@2759|Eukaryota,38C4R@33154|Opisthokonta,3NXV8@4751|Fungi,3QPTB@4890|Ascomycota,20E3Y@147545|Eurotiomycetes,3S51B@5042|Eurotiales	4751|Fungi	H	Key enzyme for ketone body catabolism. Transfers the CoA moiety from succinate to acetoacetate. Formation of the enzyme-CoA intermediate proceeds via an unstable anhydride species formed between the carboxylate groups of the enzyme and substrate	2.8.3.5	K01027
qsuy_gene_124748	20964.1	7029.61	37492.8	0.335317	1.78843	5.33356	0.352681	0.0892096	0.000324753	0.716613	0.310875	0.00350857	0.00636606	0.0437033	Au+	3.28e-44	COG0647@1|root,KOG2882@2759|Eukaryota,38E0U@33154|Opisthokonta,3NUE7@4751|Fungi,3QKE2@4890|Ascomycota,20C74@147545|Eurotiomycetes,3S4Z6@5042|Eurotiales	4751|Fungi	P	4-nitrophenylphosphatase	3.1.3.41	K01101
qsuy_gene_127424	54677	29978.5	158539	0.548283	2.89955	5.28842	0.0892096	0.00150469	4.33004e-05	0.396036	0.177283	0.00102315	0.000217168	0.0172216	Au+	1.22e-216	COG0112@1|root,KOG2467@2759|Eukaryota,38EKT@33154|Opisthokonta,3NVHZ@4751|Fungi,3QKZB@4890|Ascomycota,20C46@147545|Eurotiomycetes,3S7TG@5042|Eurotiales	4751|Fungi	H	Interconversion of serine and glycine	2.1.2.1	K00600
qsuy_gene_136593	34504.6	7310.69	100657	0.211876	2.91722	13.7685	0.0524259	0.00684146	1.08251e-05	0.309444	0.177283	0.000574593	0.00021605	0.0172216	Au+	2.93e-188	COG1208@1|root,KOG1460@2759|Eukaryota,38DS2@33154|Opisthokonta,3NTWK@4751|Fungi,3QQM9@4890|Ascomycota,20EIC@147545|Eurotiomycetes,3S7DH@5042|Eurotiales	4751|Fungi	GMO	GDP-mannose pyrophosphorylase A	2.7.7.13	K00966
qsuy_gene_153766	393355	190053	750572	0.483157	1.90813	3.94929	0.0630128	0.0524259	2.16502e-05	0.339389	0.245851	0.000724144	0.000775052	0.0178661	Au+	1.43e-41	COG1100@1|root,KOG0087@2759|Eukaryota,38FAA@33154|Opisthokonta,3NV4U@4751|Fungi,3QNA3@4890|Ascomycota,213BM@147550|Sordariomycetes,3TGQ1@5125|Hypocreales,1FR1X@110618|Nectriaceae	4751|Fungi	U	gtp-binding protein	-	K07904,K07905
qsuy_gene_154297	124213	44530.7	243492	0.358503	1.96028	5.46796	0.0146896	0.0432571	1.08251e-05	0.169987	0.228284	0.000574593	0.000280383	0.0172216	Au+	0	COG1190@1|root,KOG1885@2759|Eukaryota,38C95@33154|Opisthokonta,3NX3M@4751|Fungi,3QRKZ@4890|Ascomycota,20F30@147545|Eurotiomycetes,3S6HY@5042|Eurotiales	4751|Fungi	J	lysyl-tRNA synthetase	6.1.1.6	K04567
qsuy_gene_158807	528927	284651	624326	0.538167	1.18037	2.19331	0.00684146	0.795936	0.000205677	0.131532	0.911971	0.00258863	0.00183986	0.0235612	Au+	1.53e-103	KOG3126@1|root,KOG3126@2759|Eukaryota,38G4B@33154|Opisthokonta,3NXEA@4751|Fungi,3QKG0@4890|Ascomycota,20FSJ@147545|Eurotiomycetes,3S5JA@5042|Eurotiales	4751|Fungi	P	Outer mitochondrial membrane protein porin	-	K15040
qsuy_gene_159911	45212.3	17698	162976	0.391442	3.60468	9.20871	0.481251	0.00519604	0.000487129	0.791994	0.177283	0.00477035	0.00188309	0.0238436	Au+	7.68e-33	KOG0750@1|root,KOG0750@2759|Eukaryota,38DKN@33154|Opisthokonta,3NUAX@4751|Fungi,3QPZA@4890|Ascomycota,20D8R@147545|Eurotiomycetes,3S2XD@5042|Eurotiales	4751|Fungi	C	Belongs to the mitochondrial carrier (TC 2.A.29) family	-	-
qsuy_gene_162956	883417	391288	1.50378e+06	0.442925	1.70224	3.84317	0.0630128	0.0432571	1.08251e-05	0.339389	0.228284	0.000574593	0.000577516	0.0172216	Au+	5.26e-33	COG1552@1|root,KOG0003@2759|Eukaryota,39ZU5@33154|Opisthokonta,3P1TN@4751|Fungi,3QMXK@4890|Ascomycota,20GXI@147545|Eurotiomycetes,3S8G4@5042|Eurotiales	4751|Fungi	J	Ribosomal_L40e	-	K02927,K15219
qsuy_gene_165369	86224.1	33994.9	210548	0.394262	2.44187	6.19351	0.0892096	0.035463	0.000324753	0.396036	0.214861	0.00350857	0.00191742	0.0240087	Au+	1.49e-49	COG5256@1|root,KOG0052@2759|Eukaryota,38G33@33154|Opisthokonta,3NU3J@4751|Fungi,3QNF5@4890|Ascomycota,20D3Y@147545|Eurotiomycetes,3S5ZN@5042|Eurotiales	4751|Fungi	J	This protein promotes the GTP-dependent binding of aminoacyl-tRNA to the A-site of ribosomes during protein biosynthesis	-	K03231
qsuy_gene_170151	821348	489511	1.5689e+06	0.595985	1.91016	3.20504	0.247451	0.0232306	0.000129901	0.622878	0.192276	0.00195787	0.00177687	0.0232006	Au+	2.58e-118	COG0372@1|root,KOG2617@2759|Eukaryota,38CK5@33154|Opisthokonta,3NU5Z@4751|Fungi,3QKJD@4890|Ascomycota,20CUQ@147545|Eurotiomycetes,3S6SU@5042|Eurotiales	4751|Fungi	H	Belongs to the citrate synthase family	2.3.3.1	K01647
qsuy_gene_173345	260037	93723.9	603325	0.360425	2.32015	6.43726	0.105122	0.0185434	1.08251e-05	0.428982	0.186069	0.000574593	0.000485818	0.0172216	Au+	0	COG4284@1|root,KOG2638@2759|Eukaryota,38CTH@33154|Opisthokonta,3NWDG@4751|Fungi,3QKAS@4890|Ascomycota,20AYC@147545|Eurotiomycetes,3S4C2@5042|Eurotiales	4751|Fungi	G	UTP-glucose-1-phosphate uridylyltransferase	2.7.7.9	K00963
qsuy_gene_173493	643328	422343	1.04986e+06	0.656497	1.63192	2.4858	0.190316	0.105122	0.000487129	0.555404	0.338025	0.00477035	0.00587662	0.0414304	Au+	2.05e-132	COG0055@1|root,KOG1350@2759|Eukaryota,38CQ6@33154|Opisthokonta,3NVU5@4751|Fungi,3QPGY@4890|Ascomycota,20DV6@147545|Eurotiomycetes,3B0BQ@33183|Onygenales	4751|Fungi	C	Produces ATP from ADP in the presence of a proton gradient across the membrane	2.4.1.18,3.6.3.14	K00700,K02133
qsuy_gene_182479	10563.4	7284.04	39888.3	0.689551	3.77607	5.47612	0.105122	0.000324753	4.33004e-05	0.428982	0.177283	0.00102315	0.000131804	0.0172216	Au+	1.25e-89	COG0154@1|root,KOG1212@2759|Eukaryota,38CWX@33154|Opisthokonta,3NTYP@4751|Fungi,3QKVY@4890|Ascomycota,20JZ8@147545|Eurotiomycetes,3SA20@5042|Eurotiales	4751|Fungi	IJT	Amidase	3.5.1.4	K01426
qsuy_gene_188957	168719	65310.7	300025	0.387098	1.77826	4.59382	0.0146896	0.0630128	0.000129901	0.169987	0.262853	0.00195787	0.000739873	0.0178661	Au+	7.98e-217	COG1448@1|root,KOG1411@2759|Eukaryota,38ED5@33154|Opisthokonta,3NU8Q@4751|Fungi,3QK4W@4890|Ascomycota,3RSWV@4891|Saccharomycetes,479CZ@766764|Debaryomycetaceae	4751|Fungi	E	Aspartate aminotransferase	2.6.1.1	K14454,K14455
qsuy_gene_195334	47605.5	17242.2	118788	0.362188	2.49525	6.88938	0.393048	0.035463	0.000324753	0.732217	0.214861	0.00350857	0.00395449	0.0334488	Au+	3.56e-75	KOG3174@1|root,KOG3174@2759|Eukaryota,38E7G@33154|Opisthokonta,3NUTC@4751|Fungi,3QKF8@4890|Ascomycota,20G2F@147545|Eurotiomycetes,3S6GS@5042|Eurotiales	4751|Fungi	Z	F-actin capping protein beta subunit	-	K10365
qsuy_gene_195439	66642	30841.1	173227	0.462788	2.59936	5.61674	0.795936	0.0185434	0.000324753	0.941727	0.186069	0.00350857	0.00375072	0.0325207	Au+	2.48e-122	KOG0379@1|root,KOG0379@2759|Eukaryota,39S97@33154|Opisthokonta,3NXQV@4751|Fungi,3QSB1@4890|Ascomycota,20FFT@147545|Eurotiomycetes,3S6CF@5042|Eurotiales	4751|Fungi	S	Kelch repeat protein	-	-
qsuy_gene_198346	9894.31	5069.39	32003.4	0.512354	3.23453	6.31308	0.0288056	0.000205677	1.08251e-05	0.230602	0.177283	0.000574593	4.47601e-05	0.0172216	Au+	2.04e-13	COG0362@1|root,KOG2653@2759|Eukaryota,38BP7@33154|Opisthokonta,3BBQ7@33208|Metazoa,3CW4B@33213|Bilateria,41XSN@6656|Arthropoda,3SI9H@50557|Insecta,450RE@7147|Diptera,45H4M@7148|Nematocera	33208|Metazoa	G	Catalyzes the oxidative decarboxylation of 6- phosphogluconate to ribulose 5-phosphate and CO(2), with concomitant reduction of NADP to NADPH	1.1.1.343,1.1.1.44	K00033,K11511
qsuy_gene_202125	50468.5	22200.5	107433	0.439889	2.12871	4.8392	0.528849	0.0432571	0.000129901	0.821246	0.228284	0.00195787	0.00370264	0.0325207	Au+	1.47e-106	COG1889@1|root,KOG1596@2759|Eukaryota,38EYU@33154|Opisthokonta,3NV08@4751|Fungi,3QMKQ@4890|Ascomycota,20D1T@147545|Eurotiomycetes,3S608@5042|Eurotiales	4751|Fungi	A	Fibrillarin	-	K14563
qsuy_gene_210484	283882	150553	722869	0.530335	2.54637	4.80143	0.352681	0.00150469	1.08251e-05	0.716613	0.177283	0.000574593	0.000259495	0.0172216	Au+	5.8e-116	COG0508@1|root,KOG0557@2759|Eukaryota,38BJW@33154|Opisthokonta,3NVAH@4751|Fungi,3QJQR@4890|Ascomycota,3RR8H@4891|Saccharomycetes,47C1D@766764|Debaryomycetaceae	4751|Fungi	I	The pyruvate dehydrogenase complex catalyzes the overall conversion of pyruvate to acetyl-CoA and CO(2)	2.3.1.12	K00627
qsuy_gene_223162	50709.6	27304.5	83219.8	0.538447	1.6411	3.04784	0.075256	0.035463	7.57756e-05	0.366523	0.214861	0.00140166	0.00101627	0.0193855	Au+	2.61e-253	COG0372@1|root,KOG2617@2759|Eukaryota,38CK5@33154|Opisthokonta,3NU5Z@4751|Fungi,3QJB5@4890|Ascomycota,20E1K@147545|Eurotiomycetes,3S6KU@5042|Eurotiales	4751|Fungi	H	Belongs to the citrate synthase family	2.3.3.1	K01647
qsuy_gene_229078	61548.9	32290.8	166973	0.524637	2.71286	5.17092	0.352681	0.00519604	7.57756e-05	0.716613	0.177283	0.00140166	0.000818214	0.0179228	Au+	8.97e-215	COG5069@1|root,KOG0046@2759|Eukaryota,38BRY@33154|Opisthokonta,3NW26@4751|Fungi,3QKKG@4890|Ascomycota,20CZW@147545|Eurotiomycetes,3S640@5042|Eurotiales	4751|Fungi	Z	Actin-bundling protein Sac6	-	K17275
qsuy_gene_229302	86739.8	46059.1	151716	0.531003	1.7491	3.29395	0.0892096	0.075256	0.000487129	0.396036	0.283857	0.00477035	0.0033223	0.0306112	Au+	2.4e-265	KOG3677@1|root,KOG3677@2759|Eukaryota,38IDV@33154|Opisthokonta,3NV6Y@4751|Fungi,3QQA0@4890|Ascomycota,20D9Y@147545|Eurotiomycetes,3S48B@5042|Eurotiales	4751|Fungi	JK	component of the eukaryotic translation initiation factor 3 (eIF-3) complex, which is involved in protein synthesis of a specialized repertoire of mRNAs and, together with other initiation factors, stimulates binding of mRNA and methionyl-tRNAi to the 40S ribosome. The eIF-3 complex specifically targets and initiates translation of a subset of mRNAs involved in cell proliferation	-	K15029
qsuy_gene_237748	104985	45220.9	293398	0.430738	2.79467	6.4881	0.578742	0.0185434	0.000725281	0.846164	0.186069	0.00633972	0.00455168	0.036201	Au+	2.51e-234	COG5026@1|root,KOG1369@2759|Eukaryota,38DFC@33154|Opisthokonta,3NW32@4751|Fungi,3QJI5@4890|Ascomycota,20BQ8@147545|Eurotiomycetes,3S3KN@5042|Eurotiales	4751|Fungi	G	Belongs to the hexokinase family	2.7.1.1	K00844
qsuy_gene_249392	35142.8	11618.1	76867.6	0.330598	2.18729	6.61618	0.190316	0.0630128	0.000129901	0.555404	0.262853	0.00195787	0.00266793	0.0276348	Au+	9.53e-77	COG0639@1|root,KOG0374@2759|Eukaryota,38BV2@33154|Opisthokonta,3NWPJ@4751|Fungi,3QN3J@4890|Ascomycota,3RRXN@4891|Saccharomycetes,47AWZ@766764|Debaryomycetaceae	4751|Fungi	T	Serine threonine-protein phosphatase	3.1.3.16	K06269
qsuy_gene_252958	238716	118785	405570	0.497599	1.69896	3.41433	0.075256	0.14314	0.000487129	0.366523	0.394322	0.00477035	0.00422348	0.0345279	Au+	5.1e-23	KOG0394@1|root,KOG0394@2759|Eukaryota,38C61@33154|Opisthokonta,3NWMV@4751|Fungi,3QKEZ@4890|Ascomycota,3RSFU@4891|Saccharomycetes,47A52@766764|Debaryomycetaceae	4751|Fungi	U	GTP-binding protein	-	K07897
qsuy_gene_255089	63976.7	151423	67504.4	2.36685	1.05514	0.445799	0.00519604	0.435872	0.00150469	0.121601	0.703717	0.0106594	0.00336545	0.0306998	Su+	4.53e-76	28NVQ@1|root,2QVFP@2759|Eukaryota,39WTH@33154|Opisthokonta,3NUWT@4751|Fungi,3QS6X@4890|Ascomycota,3RTFU@4891|Saccharomycetes,479IG@766764|Debaryomycetaceae	4751|Fungi	S	Maintenance of telomere capping protein 6	-	-
qsuy_gene_256559	31081.9	9599.18	50782.2	0.308835	1.63382	5.29026	0.0146896	0.190316	0.000487129	0.169987	0.459935	0.00477035	0.00212045	0.0249314	Au+	5.14e-11	COG0638@1|root,KOG0863@2759|Eukaryota,38BYM@33154|Opisthokonta,3BG1T@33208|Metazoa,3CVEY@33213|Bilateria	33208|Metazoa	O	The proteasome is a multicatalytic proteinase complex which is characterized by its ability to cleave peptides with Arg, Phe, Tyr, Leu, and Glu adjacent to the leaving group at neutral or slightly basic pH	3.4.25.1	K02725,K13141
qsuy_gene_258932	168132	79346.3	291123	0.471929	1.73152	3.66902	0.00684146	0.0524259	0.000205677	0.131532	0.245851	0.00258863	0.000591086	0.0172216	Au+	6.1e-228	COG1062@1|root,KOG0022@2759|Eukaryota,38BN7@33154|Opisthokonta,3NVMR@4751|Fungi,3QMD3@4890|Ascomycota,3RSYW@4891|Saccharomycetes,47CAP@766764|Debaryomycetaceae	4751|Fungi	Q	Belongs to the zinc-containing alcohol dehydrogenase family. Class-III subfamily	1.1.1.1,1.1.1.284	K00121
qsuy_gene_262682	122718	65457	289003	0.533394	2.35501	4.41515	0.14314	0.00287947	1.08251e-05	0.497156	0.177283	0.000574593	0.000232539	0.0172216	Au+	1.15e-193	COG0652@1|root,KOG0546@2759|Eukaryota,38D8M@33154|Opisthokonta,3NXZR@4751|Fungi,3QM0C@4890|Ascomycota,20AMR@147545|Eurotiomycetes,3S6KR@5042|Eurotiales	4751|Fungi	O	Peptidyl-prolyl cis-trans isomerase	5.2.1.8	K05864
qsuy_gene_267687	20871.9	11606.6	39965	0.556089	1.91478	3.44329	0.0185434	0.14314	0.00519604	0.188391	0.394322	0.0276405	0.00675536	0.0450598	Au+	1.25e-149	COG0087@1|root,KOG0746@2759|Eukaryota,38CDY@33154|Opisthokonta,3NUF5@4751|Fungi,3QP4Y@4890|Ascomycota,20D3T@147545|Eurotiomycetes,3B038@33183|Onygenales,3FKQP@34383|Onygenales incertae sedis	4751|Fungi	J	Belongs to the universal ribosomal protein uL3 family	-	K02925
qsuy_gene_270155	846853	413525	1.96391e+06	0.488308	2.31906	4.74918	0.14314	0.0185434	0.000129901	0.497156	0.186069	0.00195787	0.00121435	0.0202693	Au+	1.34e-306	COG1053@1|root,COG5274@1|root,KOG0537@2759|Eukaryota,KOG2404@2759|Eukaryota,38FMG@33154|Opisthokonta,3NU5S@4751|Fungi,3QK03@4890|Ascomycota,20C0M@147545|Eurotiomycetes,3S7W1@5042|Eurotiales	4751|Fungi	C	fumarate reductase	-	K18561
qsuy_gene_281703	166322	64410.8	325498	0.387266	1.95703	5.05347	0.0089307	0.0089307	1.08251e-05	0.140682	0.177283	0.000574593	0.000111163	0.0172216	Au+	9.68e-24	KOG0279@1|root,KOG0279@2759|Eukaryota,38BFC@33154|Opisthokonta,3NUKD@4751|Fungi,3QNC3@4890|Ascomycota,20AJ7@147545|Eurotiomycetes,3S73K@5042|Eurotiales	4751|Fungi	T	beta subunit CpcB	-	K14753
qsuy_gene_284399	1.09542e+06	485321	1.65926e+06	0.443047	1.51473	3.4189	0.0232306	0.165494	0.000324753	0.208025	0.426096	0.00350857	0.00208787	0.0249314	Au+	5.13e-298	COG0056@1|root,KOG1353@2759|Eukaryota,38ERH@33154|Opisthokonta,3NUHW@4751|Fungi,3QKF2@4890|Ascomycota,20CDI@147545|Eurotiomycetes,3S2NV@5042|Eurotiales	4751|Fungi	C	Produces ATP from ADP in the presence of a proton gradient across the membrane	-	K02132
qsuy_gene_284400	61357.5	15662.9	174630	0.255272	2.8461	11.1493	0.279861	0.0114962	0.000129901	0.655994	0.17917	0.00195787	0.0013121	0.0208484	Au+	7.03e-16	COG0056@1|root,KOG1353@2759|Eukaryota,38ERH@33154|Opisthokonta,3NUHW@4751|Fungi,3QKF2@4890|Ascomycota	4751|Fungi	C	Produces ATP from ADP in the presence of a proton gradient across the membrane	-	K02132
qsuy_gene_284423	219019	93130.2	445867	0.425214	2.03574	4.78756	0.075256	0.0089307	1.08251e-05	0.366523	0.177283	0.000574593	0.000288829	0.0172216	Au+	1.99e-90	COG0126@1|root,KOG1367@2759|Eukaryota,38EF9@33154|Opisthokonta,3NVNN@4751|Fungi,3QPZ4@4890|Ascomycota,20CR1@147545|Eurotiomycetes,3S5H4@5042|Eurotiales	4751|Fungi	G	Belongs to the phosphoglycerate kinase family	2.7.2.3	K00927
qsuy_gene_288330	14761.6	6473.86	44191.4	0.438561	2.99368	6.82613	0.0146896	0.0524259	0.00287947	0.169987	0.245851	0.0177096	0.00294662	0.0290842	Au+	2.83e-115	KOG0116@1|root,KOG0116@2759|Eukaryota,390RG@33154|Opisthokonta,3NXYT@4751|Fungi,3QP14@4890|Ascomycota,20AV5@147545|Eurotiomycetes,3S2Z6@5042|Eurotiales	4751|Fungi	A	NTF2 and RRM domain protein	-	K19718
qsuy_gene_297224	304178	199146	501916	0.654702	1.65007	2.52034	0.190316	0.0524259	0.00150469	0.555404	0.245851	0.0106594	0.00659176	0.0443957	Au+	6.18e-96	COG0330@1|root,KOG3083@2759|Eukaryota,38DP2@33154|Opisthokonta,3NW8M@4751|Fungi,3QJP3@4890|Ascomycota,20FM3@147545|Eurotiomycetes,3S78N@5042|Eurotiales	4751|Fungi	O	Prohibitin complex subunit Phb1	-	K17080
qsuy_gene_298715	34322	7686.64	121175	0.223957	3.53053	15.7643	0.0432571	0.0524259	0.00519604	0.279663	0.245851	0.0276405	0.0064654	0.0437699	Au+	5.86e-126	KOG0660@1|root,KOG0660@2759|Eukaryota,38BZX@33154|Opisthokonta,3NVP2@4751|Fungi,3QNMV@4890|Ascomycota,20AVW@147545|Eurotiomycetes,3S3HC@5042|Eurotiales	4751|Fungi	T	Mitogen-activated protein kinase	2.7.11.24	K04464
qsuy_gene_301836	76817.6	26726.9	147786	0.347927	1.92385	5.52947	0.00287947	0.0288056	1.08251e-05	0.109855	0.203276	0.000574593	0.000114511	0.0172216	Au+	4.55e-76	COG0612@1|root,KOG2583@2759|Eukaryota,38G11@33154|Opisthokonta,3NXHG@4751|Fungi,3QRRF@4890|Ascomycota,20EN6@147545|Eurotiomycetes,3S3BW@5042|Eurotiales	4751|Fungi	C	Ubiquinol-cytochrome c reductase complex core protein 2	-	K00415
qsuy_gene_303255	1.14399e+06	611756	2.21744e+06	0.534756	1.93834	3.62472	0.165494	0.0114962	0.000205677	0.527292	0.17917	0.00258863	0.00123808	0.0202693	Au+	5.3e-82	COG0480@1|root,KOG0469@2759|Eukaryota,38CUM@33154|Opisthokonta,3NW98@4751|Fungi,3QKTN@4890|Ascomycota,3RSGV@4891|Saccharomycetes,3RZVA@4893|Saccharomycetaceae	4751|Fungi	J	to Saccharomyces cerevisiae EFT2 (YDR385W) and EFT1 (YOR133W)	-	K03234
