# Supplementary material for: Quantitative metaproteomics reveals composition and metabolism characteristics of microbial communities in Chinese liquor fermentation starters
Source: Front Microbiol. 2023 Jan 9;13:1098268. doi: 10.3389/fmicb.2022.1098268 (PMC9868298; doi:10.3389/fmicb.2022.1098268)
Supplement: Supplementary file 6 [file Data_Sheet_6.XLSX]

## Sheet: Eurotiomycetes
Supplementary Data 6: The differential proteins in black Daqu microbiota across seasons with KEGG pathway enrichment.
ID	Description	GeneRatio	BgRatio	pvalue	p.adjust	qvalue	geneID	Count
ko01200	Carbon metabolism	52/323	84/1991	2.89146e-22	2.51557e-20	1.58269e-20	K01810/K00927/K01070/K01689/K00831/K00074/K01900/K01895/K17069/K00814/K01624/K01958/K00658/K14729/K00234/K00161/K00030/K00626/K00863/K00134/K01681/K00627/K01803/K00873/K00031/K00026/K01647/K17066/K00382/K03781/K07511/K00600/K00058/K00162/K05605/K00844/K01679/K00033/K14454/K00850/K01738/K01610/K03841/K00164/K00830/K00615/K00140/K14455/K00616/K00605/K00281/K01637	52
ko01230	Biosynthesis of amino acids	44/323	99/1991	8.18462e-12	3.56031e-10	2.24e-10	K00789/K01655/K00927/K00293/K01689/K00831/K01850/K00549/K00826/K17069/K01697/K13501/K00814/K01624/K01733/K01958/K00030/K01940/K00052/K00134/K01681/K00133/K12659/K01694/K01803/K05824/K00873/K00817/K00031/K01647/K01739/K01760/K00053/K01687/K00600/K00058/K01755/K00147/K14454/K00850/K01738/K00615/K14455/K00616	44
ko00280	Valine, leucine and isoleucine degradation	19/323	25/1991	4.2758e-11	1.23998e-09	7.80146e-10	K01968/K00128/K00166/K00826/K01969/K07513/K00167/K00626/K01640/K00020/K01027/K00382/K07511/K00253/K05605/K00249/K09699/K00140/K13524	19
ko00020	Citrate cycle (TCA cycle)	17/323	21/1991	8.27991e-11	1.80088e-09	1.13304e-09	K01900/K01958/K00658/K00234/K00161/K00030/K01681/K00627/K01648/K00031/K00026/K01647/K00382/K00162/K01679/K01610/K00164	17
ko00010	Glycolysis / Gluconeogenesis	18/323	27/1991	4.55287e-09	7.92199e-08	4.98419e-08	K01810/K00128/K00927/K01689/K01895/K01785/K01624/K00161/K00134/K00627/K01803/K00873/K00382/K00162/K00844/K00850/K01610/K03841	18
ko01110	Biosynthesis of secondary metabolites	98/323	380/1991	5.80807e-08	8.4217e-07	5.29859e-07	K00789/K01655/K01810/K00128/K17819/K00927/K00293/K01188/K01756/K01689/K00831/K01850/K00549/K01900/K01895/K00166/K00966/K00826/K17069/K01697/K13501/K00700/K05894/K01785/K01624/K01733/K00658/K07513/K00234/K00161/K00030/K01940/K00167/K00626/K00088/K01640/K00052/K00134/K01681/K00133/K00627/K12659/K01694/K01923/K01803/K01648/K00939/K05824/K00873/K00817/K00228/K00031/K00026/K01647/K01580/K01739/K01760/…	98
ko03050	Proteasome	19/323	36/1991	3.63605e-07	4.5191e-06	2.84323e-06	K03065/K03030/K03036/K03064/K03066/K03063/K02726/K02725/K03035/K02732/K02736/K03031/K03028/K02731/K03062/K02738/K03032/K02735/K02729	19
ko00250	Alanine, aspartate and glutamate metabolism	15/323	25/1991	7.25586e-07	7.89075e-06	4.96453e-06	K00294/K01756/K13566/K00814/K01940/K00135/K00820/K01580/K01955/K01755/K14454/K15371/K00830/K14455/K13524	15
ko01210	2-Oxocarboxylic acid metabolism	15/323	28/1991	5.18218e-06	5.00944e-05	3.15173e-05	K01655/K00826/K00814/K00030/K00052/K01681/K00133/K12659/K05824/K00031/K01647/K00053/K01687/K14454/K14455	15
ko00640	Propanoate metabolism	12/323	20/1991	1.0073e-05	7.96683e-05	5.0124e-05	K01900/K01895/K00166/K14729/K00167/K01720/K00382/K07511/K05605/K09699/K00140/K13524	12
ko00680	Methane metabolism	12/323	20/1991	1.0073e-05	7.96683e-05	5.0124e-05	K01070/K01689/K00831/K01895/K01624/K00863/K17066/K00600/K00058/K00850/K03841/K00830	12
ko00630	Glyoxylate and dicarboxylate metabolism	14/323	27/1991	1.78546e-05	0.000129446	8.1442e-05	K01895/K00626/K01681/K18123/K22133/K00026/K01647/K00382/K03781/K00600/K00830/K00605/K00281/K01637	14
ko00620	Pyruvate metabolism	16/323	34/1991	2.15375e-05	0.000144136	9.06844e-05	K01069/K01655/K00128/K01759/K01895/K01958/K00161/K00626/K00627/K00873/K00026/K00382/K00162/K01679/K01610/K00101	16
ko00270	Cysteine and methionine metabolism	17/323	38/1991	2.71192e-05	0.000168526	0.00010603	K08963/K00789/K00797/K00831/K00549/K00826/K17069/K01697/K00133/K00026/K01739/K01760/K00058/K14454/K01738/K14455/K01251	17
ko00410	beta-Alanine metabolism	8/323	14/1991	0.000539433	0.00312871	0.00196846	K00128/K14729/K01580/K07511/K05605/K00140/K13524/K00276	8
ko00260	Glycine, serine and threonine metabolism	14/323	36/1991	0.000827039	0.00449702	0.00282934	K16066/K00831/K01697/K01733/K00133/K01694/K00382/K00600/K00058/K00130/K00830/K00605/K00281/K00276	14
ko00052	Galactose metabolism	8/323	15/1991	0.000994435	0.00508917	0.00320189	K01684/K01784/K01785/K00844/K07407/K00849/K00850/K00963	8
ko00970	Aminoacyl-tRNA biosynthesis	16/323	46/1991	0.00147167	0.00711306	0.00447525	K01870/K01868/K01875/K01886/K01883/K01890/K01873/K01874/K01876/K01889/K01893/K01887/K01892/K01869/K01881/K04567	16
ko00220	Arginine biosynthesis	8/323	17/1991	0.00278312	0.0127438	0.00801785	K00814/K01940/K01427/K12659/K01755/K14454/K15371/K14455	8
ko00650	Butanoate metabolism	8/323	18/1991	0.00431408	0.0187662	0.0118069	K00074/K00626/K01640/K01027/K00135/K01580/K07511/K13524	8
ko04141	Protein processing in endoplasmic reticulum	21/323	74/1991	0.00511173	0.0211772	0.0133238	K09580/K03283/K08288/K09481/K08054/K09490/K14005/K14007/K05546/K12666/K14018/K14004/K14009/K07953/K12670/K13525/K10080/K09486/K13993/K01228/K04079	21
ko00360	Phenylalanine metabolism	7/323	15/1991	0.00547875	0.021666	0.0136314	K01426/K00074/K00457/K00817/K14454/K14455/K00276	7
ko00030	Pentose phosphate pathway	8/323	19/1991	0.00641931	0.0242817	0.0152771	K01810/K00852/K01624/K00033/K00850/K03841/K00615/K00616	8
ko04145	Phagosome	11/323	31/1991	0.00682525	0.0247415	0.0155664	K02150/K07374/K02154/K09481/K02145/K02151/K08054/K02148/K02147/K07889/K02146	11
ko00380	Tryptophan metabolism	9/323	25/1991	0.0127107	0.0413749	0.0260314	K01426/K00128/K14264/K00658/K00626/K01501/K00382/K03781/K07511	9
ko01250	Biosynthesis of nucleotide sugars	9/323	25/1991	0.0127107	0.0413749	0.0260314	K00972/K01810/K01836/K00966/K01784/K00820/K00844/K00849/K00963	9
ko00350	Tyrosine metabolism	8/323	21/1991	0.0128405	0.0413749	0.0260314	K00457/K00451/K00135/K00817/K02510/K14454/K14455/K00276	8
ko00071	Fatty acid degradation	6/323	14/1991	0.0164373	0.0502192	0.0315958	K00128/K01897/K07513/K00626/K07511/K00249	6
ko00040	Pentose and glucuronate interconversions	9/323	26/1991	0.0167397	0.0502192	0.0315958	K00854/K17818/K18106/K00008/K05351/K18107/K00065/K17743/K00963	9
ko00330	Arginine and proline metabolism	9/323	27/1991	0.0216294	0.0627252	0.0394641	K01426/K00128/K00797/K00294/K18123/K00147/K14454/K01480/K14455	9
ko00480	Glutathione metabolism	7/323	19/1991	0.023898	0.0670685	0.0421968	K00681/K00797/K00799/K01469/K00031/K00033/K15428	7
ko00310	Lysine degradation	7/323	20/1991	0.0318014	0.0864601	0.0543972	K00128/K00293/K00658/K00626/K00135/K00382/K07511	7
ko00920	Sulfur metabolism	6/323	16/1991	0.0329435	0.086851	0.0546431	K17069/K01082/K01739/K00958/K00860/K01738	6
ko00051	Fructose and mannose metabolism	9/323	29/1991	0.0343323	0.0878502	0.0552717	K00009/K00966/K01624/K00863/K01803/K00008/K00844/K00850/K03841	9
ko01212	Fatty acid metabolism	8/323	25/1991	0.0378566	0.0941008	0.0592043	K01897/K07512/K07513/K00626/K07511/K00667/K00668/K00249	8
ko00230	Purine metabolism	13/323	50/1991	0.0500358	0.12092	0.0760778	K01756/K01514/K00088/K01427/K01923/K00939/K00958/K00942/K00860/K00759/K18550/K11788/K00602	13
ko00290	Valine, leucine and isoleucine biosynthesis	4/323	10/1991	0.0636074	0.149563	0.0940991	K00826/K00052/K00053/K01687	4
ko04144	Endocytosis	15/323	65/1991	0.0918176	0.210214	0.132258	K03283/K05758/K17917/K18584/K10365/K05754/K07889/K12562/K05755/K17260/K19366/K01115/K05757/K07937/K04646	15
ko00520	Amino sugar and nucleotide sugar metabolism	9/323	35/1991	0.100171	0.223459	0.140592	K00972/K01810/K01836/K00966/K01784/K00820/K00844/K00849/K00963	9
ko00190	Oxidative phosphorylation	19/323	88/1991	0.108262	0.233017	0.146605	K02150/K02154/K02145/K01535/K02151/K02133/K03953/K00234/K02148/K02147/K01507/K02137/K03943/K02141/K02146/K00413/K03934/K02132/K00415	19
ko00400	Phenylalanine, tyrosine and tryptophan biosynthesis	6/323	21/1991	0.110534	0.233017	0.146605	K01850/K13501/K01694/K00817/K14454/K14455	6
ko04146	Peroxisome	11/323	46/1991	0.112491	0.233017	0.146605	K12261/K01897/K13352/K07513/K01640/K11187/K00031/K03781/K00624/K04565/K00830	11
ko00670	One carbon pool by folate	4/323	12/1991	0.115269	0.233218	0.146731	K00288/K00600/K00605/K00602	4
ko00300	Lysine biosynthesis	4/323	13/1991	0.146217	0.289111	0.181897	K01655/K00293/K00133/K05824	4
ko00500	Starch and sucrose metabolism	7/323	29/1991	0.17794	0.344016	0.216441	K01810/K01210/K01188/K00700/K00697/K00844/K00963	7
ko03013	Nucleocytoplasmic transport	12/323	60/1991	0.257629	0.479083	0.301419	K14298/K18423/K14290/K20224/K12877/K14293/K14004/K12812/K15436/K18752/K14312/K03231	12
ko00730	Thiamine metabolism	3/323	11/1991	0.258815	0.479083	0.301419	K18278/K04487/K00939	3
ko00770	Pantothenate and CoA biosynthesis	4/323	17/1991	0.292692	0.530505	0.333772	K00128/K00826/K00053/K01687	4
ko01240	Biosynthesis of cofactors	21/323	116/1991	0.323836	0.574974	0.36175	K00789/K00128/K18278/K01756/K00831/K00762/K04487/K00966/K00826/K00457/K00275/K00939/K00228/K00382/K00288/K03809/K00600/K01955/K01591/K00794/K00963	21
ko00062	Fatty acid elongation	2/323	10/1991	0.500295	0.853444	0.536952	K07512/K07511	2
ko00130	Ubiquinone and other terpenoid-quinone biosynthesis	2/323	10/1991	0.500295	0.853444	0.536952	K00457/K03809	2
ko01232	Nucleotide metabolism	6/323	36/1991	0.541794	0.906464	0.57031	K01756/K00088/K00939/K00942/K00759/K18550	6
ko00561	Glycerolipid metabolism	4/323	24/1991	0.562393	0.923173	0.580823	K00128/K18097/K00863/K07407	4
ko03018	RNA degradation	8/323	51/1991	0.602028	0.969934	0.610243	K12620/K04077/K01689/K04043/K13126/K12614/K00850/K12584	8
ko00900	Terpenoid backbone biosynthesis	3/323	19/1991	0.61702	0.976014	0.614068	K00626/K00787/K01597	3
ko00340	Histidine metabolism	2/323	13/1991	0.648618	0.999995	0.629156	K00128/K00817	2
ko00240	Pyrimidine metabolism	4/323	28/1991	0.689333	0.999995	0.629156	K16066/K00762/K01955/K01591	4
ko00910	Nitrogen metabolism	2/323	15/1991	0.726647	0.999995	0.629156	K01501/K15371	2
ko03250	Viral life cycle - HIV-1	2/323	15/1991	0.726647	0.999995	0.629156	K14290/K15436	2
ko00510	N-Glycan biosynthesis	4/323	30/1991	0.742159	0.999995	0.629156	K05546/K12666/K12670/K01228	4
ko00562	Inositol phosphate metabolism	3/323	24/1991	0.773119	0.999995	0.629156	K01803/K21797/K00140	3
ko00760	Nicotinate and nicotinamide metabolism	2/323	17/1991	0.789519	0.999995	0.629156	K00135/K18550	2
ko03060	Protein export	2/323	18/1991	0.815912	0.999995	0.629156	K09481/K09490	2
ko00053	Ascorbate and aldarate metabolism	1/323	11/1991	0.858081	0.999995	0.629156	K00128	1
ko04122	Sulfur relay system	1/323	11/1991	0.858081	0.999995	0.629156	K04487	1
ko03010	Ribosome	15/323	116/1991	0.870614	0.999995	0.629156	K02865/K02984/K02981/K02973/K02908/K02995/K02891/K02989/K02938/K02941/K02947/K02932/K02927/K02925/K02870	15
ko04138	Autophagy - yeast	8/323	67/1991	0.874912	0.999995	0.629156	K05758/K06027/K18584/K05754/K05755/K17260/K05757/K04464	8
ko00740	Riboflavin metabolism	1/323	12/1991	0.881232	0.999995	0.629156	K00794	1
ko01040	Biosynthesis of unsaturated fatty acids	1/323	12/1991	0.881232	0.999995	0.629156	K07513	1
ko00564	Glycerophospholipid metabolism	4/323	39/1991	0.899143	0.999995	0.629156	K06128/K06130/K00006/K01115	4
ko03015	mRNA surveillance pathway	5/323	47/1991	0.900585	0.999995	0.629156	K03456/K12877/K13126/K12812/K03267	5
ko04139	Mitophagy - yeast	3/323	31/1991	0.900654	0.999995	0.629156	K17065/K03097/K04464	3
ko04011	MAPK signaling pathway - yeast	6/323	58/1991	0.928437	0.999995	0.629156	K06630/K03781/K00006/K06666/K04464/K11232	6
ko00513	Various types of N-glycan biosynthesis	2/323	25/1991	0.931285	0.999995	0.629156	K12666/K12670	2
ko00860	Porphyrin metabolism	1/323	17/1991	0.951321	0.999995	0.629156	K00228	1
ko00600	Sphingolipid metabolism	1/323	18/1991	0.959286	0.999995	0.629156	K07407	1
ko00100	Steroid biosynthesis	1/323	19/1991	0.965951	0.999995	0.629156	K01852	1
ko03430	Mismatch repair	1/323	19/1991	0.965951	0.999995	0.629156	K04802	1
ko03410	Base excision repair	1/323	20/1991	0.971528	0.999995	0.629156	K04802	1
ko04070	Phosphatidylinositol signaling system	1/323	20/1991	0.971528	0.999995	0.629156	K21797	1
ko03030	DNA replication	1/323	29/1991	0.994334	0.999995	0.629156	K04802	1
ko04120	Ubiquitin mediated proteolysis	3/323	59/1991	0.997998	0.999995	0.629156	K10599/K03178/K02927	3
ko03420	Nucleotide excision repair	1/323	36/1991	0.998395	0.999995	0.629156	K04802	1
ko03008	Ribosome biogenesis in eukaryotes	3/323	71/1991	0.999683	0.999995	0.629156	K14290/K03097/K14563	3
ko04113	Meiosis - yeast	2/323	60/1991	0.999733	0.999995	0.629156	K03456/K04630	2
ko03040	Spliceosome	4/323	87/1991	0.99985	0.999995	0.629156	K03283/K10599/K12877/K12812	4
ko04111	Cell cycle - yeast	2/323	83/1991	0.999995	0.999995	0.629156	K03456/K06666	2

## Sheet: Saccharomycetes
ID	Description	GeneRatio	BgRatio	pvalue	p.adjust	qvalue	geneID	Count
ko01200	Carbon metabolism	6/17	80/1997	2.98053e-05	0.000924632	0.000501395	K00031/K00030/K14454/K14455/K00627/K00121	6
ko01210	2-Oxocarboxylic acid metabolism	4/17	27/1997	5.60383e-05	0.000924632	0.000501395	K00031/K00030/K14454/K14455	4
ko00350	Tyrosine metabolism	3/17	16/1997	0.000268257	0.00295082	0.00160013	K14454/K14455/K00121	3
ko00020	Citrate cycle (TCA cycle)	3/17	21/1997	0.0006205	0.00511913	0.00277592	K00031/K00030/K00627	3
ko04144	Endocytosis	4/17	67/1997	0.0019819	0.0130806	0.00709312	K03283/K07889/K07897/K07937	4
ko00360	Phenylalanine metabolism	2/17	11/1997	0.00358733	0.0197303	0.0106991	K14454/K14455	2
ko01110	Biosynthesis of secondary metabolites	7/17	295/1997	0.00734745	0.0315174	0.0170908	K00031/K00030/K14454/K14455/K00627/K00121/K00700	7
ko01230	Biosynthesis of amino acids	4/17	97/1997	0.00764057	0.0315174	0.0170908	K00031/K00030/K14454/K14455	4
ko00220	Arginine biosynthesis	2/17	17/1997	0.00860782	0.031562	0.017115	K14454/K14455	2
ko00400	Phenylalanine, tyrosine and tryptophan biosynthesis	2/17	20/1997	0.0118465	0.0390933	0.0211989	K14454/K14455	2
ko00330	Arginine and proline metabolism	2/17	23/1997	0.0155397	0.046619	0.0252799	K14454/K14455	2
ko00250	Alanine, aspartate and glutamate metabolism	2/17	25/1997	0.0182433	0.0501691	0.0272049	K14454/K14455	2
ko00010	Glycolysis / Gluconeogenesis	2/17	28/1997	0.0226448	0.0574831	0.031171	K00627/K00121	2
ko00620	Pyruvate metabolism	2/17	31/1997	0.027443	0.0603746	0.032739	K00627/K00121	2
ko04145	Phagosome	2/17	31/1997	0.027443	0.0603746	0.032739	K07889/K07897	2
ko00270	Cysteine and methionine metabolism	2/17	38/1997	0.0400676	0.0826395	0.0448125	K14454/K14455	2
ko00071	Fatty acid degradation	1/17	14/1997	0.113152	0.219648	0.119108	K00121	1
ko03250	Viral life cycle - HIV-1	1/17	15/1997	0.120755	0.221384	0.120049	K07936	1
ko04141	Protein processing in endoplasmic reticulum	2/17	77/1997	0.137529	0.225024	0.122023	K03283/K06689	2
ko00480	Glutathione metabolism	1/17	18/1997	0.143197	0.225024	0.122023	K00031	1
ko00680	Methane metabolism	1/17	18/1997	0.143197	0.225024	0.122023	K00121	1
ko04213	Longevity regulating pathway - multiple species	1/17	22/1997	0.172282	0.256401	0.139037	K03283	1
ko00190	Oxidative phosphorylation	2/17	91/1997	0.179724	0.256401	0.139037	K02137/K02133	2
ko00500	Starch and sucrose metabolism	1/17	24/1997	0.186474	0.256401	0.139037	K00700	1
ko04146	Peroxisome	1/17	46/1997	0.328192	0.433213	0.234916	K00031	1
ko03015	mRNA surveillance pathway	1/17	49/1997	0.34561	0.438658	0.237869	K06269	1
ko04120	Ubiquitin mediated proteolysis	1/17	60/1997	0.405906	0.496107	0.269022	K06689	1
ko03013	Nucleocytoplasmic transport	1/17	67/1997	0.441511	0.520352	0.282169	K07936	1
ko03008	Ribosome biogenesis in eukaryotes	1/17	78/1997	0.493431	0.55746	0.302291	K07936	1
ko04138	Autophagy - yeast	1/17	81/1997	0.506782	0.55746	0.302291	K07897	1
ko04011	MAPK signaling pathway - yeast	1/17	91/1997	0.548932	0.584347	0.316871	K06630	1
ko03040	Spliceosome	1/17	96/1997	0.568713	0.586485	0.31803	K03283	1
ko04113	Meiosis - yeast	1/17	102/1997	0.591372	0.591372	0.32068	K06269	1

## Sheet: Sordariomycetes
ID	Description	GeneRatio	BgRatio	pvalue	p.adjust	qvalue	geneID	Count
ko01200	Carbon metabolism	6/20	87/2033	0.000123577	0.00308943	0.00221138	K00873/K01637/K17066/K01895/K14729/K01647	6
ko00630	Glyoxylate and dicarboxylate metabolism	3/20	28/2033	0.00228166	0.0285208	0.0204149	K01637/K01895/K01647	3
ko00730	Thiamine metabolism	2/20	12/2033	0.00572235	0.0476863	0.0341333	K00877/K04487	2
ko00640	Propanoate metabolism	2/20	20/2033	0.0157146	0.0944108	0.0675783	K01895/K14729	2
ko00680	Methane metabolism	2/20	22/2033	0.0188822	0.0944108	0.0675783	K17066/K01895	2
ko00040	Pentose and glucuronate interconversions	2/20	28/2033	0.0298282	0.121164	0.0867281	K18106/K17818	2
ko00010	Glycolysis / Gluconeogenesis	2/20	30/2033	0.033926	0.121164	0.0867281	K00873/K01895	2
ko00620	Pyruvate metabolism	2/20	35/2033	0.0450659	0.140831	0.100805	K00873/K01895	2
ko01110	Biosynthesis of secondary metabolites	7/20	364/2033	0.0514685	0.142968	0.102335	K00873/K01637/K00700/K01895/K01647/K00010/K00290	7
ko01230	Biosynthesis of amino acids	3/20	100/2033	0.0716813	0.179203	0.128272	K00873/K01647/K00290	3
ko04122	Sulfur relay system	1/20	11/2033	0.103288	0.233661	0.167252	K04487	1
ko00300	Lysine biosynthesis	1/20	12/2033	0.112157	0.233661	0.167252	K00290	1
ko03013	Nucleocytoplasmic transport	2/20	64/2033	0.129023	0.246908	0.176734	K18423/K20222	2
ko00410	beta-Alanine metabolism	1/20	15/2033	0.138268	0.246908	0.176734	K14729	1
ko00310	Lysine degradation	1/20	20/2033	0.180173	0.285757	0.204542	K00290	1
ko00020	Citrate cycle (TCA cycle)	1/20	21/2033	0.188319	0.285757	0.204542	K01647	1
ko00480	Glutathione metabolism	1/20	22/2033	0.196387	0.285757	0.204542	K00383	1
ko00562	Inositol phosphate metabolism	1/20	24/2033	0.212296	0.285757	0.204542	K00010	1
ko00190	Oxidative phosphorylation	2/20	89/2033	0.217175	0.285757	0.204542	K02133/K02132	2
ko01210	2-Oxocarboxylic acid metabolism	1/20	28/2033	0.24322	0.298535	0.213688	K01647	1
ko00500	Starch and sucrose metabolism	1/20	29/2033	0.250769	0.298535	0.213688	K00700	1
ko04145	Phagosome	1/20	33/2033	0.280256	0.318472	0.227959	K08054	1
ko01240	Biosynthesis of cofactors	2/20	122/2033	0.339877	0.369431	0.264435	K00877/K04487	2
ko04144	Endocytosis	1/20	67/2033	0.490047	0.510465	0.365386	K07904	1
ko04141	Protein processing in endoplasmic reticulum	1/20	76/2033	0.534969	0.534969	0.382925	K08054	1

## Sheet: Bacilli
ID	Description	GeneRatio	BgRatio	pvalue	p.adjust	qvalue	geneID	Count
ko00640	Propanoate metabolism	3/11	64/3199	0.00112407	0.0208049	0.0145999	K01720/K00248/K01903	3
ko00071	Fatty acid degradation	2/11	24/3199	0.00284748	0.0208049	0.0145999	K00248/K00249	2
ko01200	Carbon metabolism	4/11	192/3199	0.00297212	0.0208049	0.0145999	K00615/K00248/K01903/K00658	4
ko01212	Fatty acid metabolism	2/11	31/3199	0.00473472	0.0248573	0.0174437	K00248/K00249	2
ko00020	Citrate cycle (TCA cycle)	2/11	40/3199	0.00780899	0.0286792	0.0201257	K01903/K00658	2
ko00280	Valine, leucine and isoleucine degradation	2/11	41/3199	0.00819405	0.0286792	0.0201257	K00248/K00249	2
ko00750	Vitamin B6 metabolism	1/11	12/3199	0.0405599	0.12168	0.0853892	K06215	1
ko00660	C5-Branched dibasic acid metabolism	1/11	16/3199	0.0537437	0.123447	0.0866298	K01903	1
ko00230	Purine metabolism	2/11	112/3199	0.0543645	0.123447	0.0866298	K01945/K11175	2
ko00670	One carbon pool by folate	1/11	20/3199	0.0667627	0.123447	0.0866298	K11175	1
ko03018	RNA degradation	1/11	20/3199	0.0667627	0.123447	0.0866298	K04043	1
ko00410	beta-Alanine metabolism	1/11	22/3199	0.0732109	0.123447	0.0866298	K00248	1
ko00710	Carbon fixation in photosynthetic organisms	1/11	23/3199	0.0764198	0.123447	0.0866298	K00615	1
ko00053	Ascorbate and aldarate metabolism	1/11	27/3199	0.0891547	0.13352	0.0936984	K03077	1
ko00380	Tryptophan metabolism	1/11	29/3199	0.0954621	0.13352	0.0936984	K00658	1
ko00310	Lysine degradation	1/11	31/3199	0.10173	0.13352	0.0936984	K00658	1
ko00040	Pentose and glucuronate interconversions	1/11	56/3199	0.176814	0.216334	0.151813	K03077	1
ko00030	Pentose phosphate pathway	1/11	59/3199	0.185429	0.216334	0.151813	K00615	1
ko00650	Butanoate metabolism	1/11	80/3199	0.24348	0.269109	0.188849	K00248	1
ko01230	Biosynthesis of amino acids	1/11	169/3199	0.450086	0.47259	0.331642	K00615	1
ko01240	Biosynthesis of cofactors	1/11	248/3199	0.588968	0.588968	0.413311	K06215	1
